# Supplementary material
Source: PubMed Central journal article supplement (PMC4084837)
Supplement: ol5016724_si_001.pdf [file ol5016724_si_001.pdf]

# ***Enantiospecific, Nickel-Catalyzed Cross-Couplings of Allylic Pivalates and Arylboroxines***

Harathi D. Srinivas, Qi Zhou, Mary P. Watson\*

Department of Chemistry and Biochemistry, University of Delaware, Newark, DE 19716

mpwatson@udel.edu

## Supporting Information

|                                                                                                                                                      |             |
|------------------------------------------------------------------------------------------------------------------------------------------------------|-------------|
| <b>General Information.....</b>                                                                                                                      | <b>S2</b>   |
| <b>Stereospecific Cross Coupling of Allylic Pivalates with Boroxines .....</b>                                                                       | <b>S4</b>   |
| <b>General Procedure for the Stereospecific, Nickel-Catalyzed Coupling of Allylic Pivalates with Boroxines .....</b>                                 | <b>S4</b>   |
| <b>Benchmark Experiment: Preparation of (<i>S,E</i>)-But-1-ene-1,3-diyl dibenzene (2).....</b>                                                       | <b>S17</b>  |
| <b>Cross Coupling of Pivalate 27 .....</b>                                                                                                           | <b>S17</b>  |
| <b>Cross Coupling of Pivalate 28 .....</b>                                                                                                           | <b>S18</b>  |
| <b>General Procedure for the Preparation of Allylic Pivalates: Preparation of (<i>R</i>)-4-Phenylbutan-2-yl Pivalate (1a).....</b>                   | <b>S20</b>  |
| <b>Preparation of Enantioenriched Allylic Alcohols .....</b>                                                                                         | <b>S25</b>  |
| <b>General Procedure for the Preparation of Allylic Alcohols S-1a to S-1i: Preparation of (<i>R</i>)-4-(4-Cyanophenyl)-3-buten-2-ol (S-1e) .....</b> | <b>S26</b>  |
| <b>Preparation of Allylic Alcohols S-27 and S-28 .....</b>                                                                                           | <b>S27</b>  |
| <b>Preparation of (<i>S</i>)-Ketoprofen .....</b>                                                                                                    | <b>S28</b>  |
| <b>NMR Spectra .....</b>                                                                                                                             | <b>S30</b>  |
| <b>HPLC Spectra .....</b>                                                                                                                            | <b>S107</b> |
| <b>Crystal Structure Report for (<i>S</i>)-17 .....</b>                                                                                              | <b>S147</b> |

## General Information

Reactions were performed either in a N<sub>2</sub>-atmosphere glovebox in oven-dried 1-dram vials with Teflon-lined caps or in oven-dried round-bottomed flasks unless otherwise noted. Flasks were fitted with rubber septa, and reactions were conducted under a positive pressure of N<sub>2</sub>. Stainless steel syringes or cannulae were used to transfer air- and moisture-sensitive liquids. Flash chromatography was performed on silica gel 60 (40-63 μm, 60Å) unless otherwise noted. Thin layer chromatography (TLC) was performed on glass plates coated with silica gel 60 with F254 indicator. Commercial reagents were purchased from Sigma Aldrich, Acros, Fisher, Strem, TCI, Combi Blocks, Alfa Aesar, or Cambridge Isotopes Laboratories and used as received with the following exceptions: toluene, CH<sub>2</sub>Cl<sub>2</sub>, dioxane, MeCN and Et<sub>2</sub>O were dried by passing through drying columns.<sup>1</sup> Toluene and MeCN were then degassed by sparging with N<sub>2</sub> and stored over activated 4Å MS in a N<sub>2</sub>-atmosphere glovebox. Pivaloyl chloride was purchased from Sigma Aldrich and distilled before use. Boronic acids were purchased from Combi Blocks and were converted to the boroxines according to literature procedure.<sup>2</sup> Racemic products **2–24** were prepared from the corresponding racemic pivalates using the General Procedure for the cross coupling described below. CDCl<sub>3</sub> was stored over oven-dried potassium carbonate. Proton nuclear magnetic resonance (<sup>1</sup>H NMR) spectra and carbon nuclear magnetic resonance (<sup>13</sup>C NMR) spectra were recorded on both 400 MHz and 600 MHz spectrometers. Chemical shifts for protons are reported in parts per million downfield from tetramethylsilane and are referenced to residual protium in the NMR solvent (CHCl<sub>3</sub> = δ 7.26; (CD<sub>3</sub>)<sub>2</sub>CO = δ 2.07). Chemical shifts for carbon are reported in parts per million downfield from tetramethylsilane and are referenced to the carbon resonances of the solvent (CDCl<sub>3</sub> = δ 77.2; (CD<sub>3</sub>)<sub>2</sub>CO = δ 28.94). Data are represented as follows: chemical shift, multiplicity (br = broad, s = singlet, d = doublet, t = triplet, q = quartet, p = pentet, m = multiplet, dd = doublet of doublets, h = heptet), coupling constants in Hertz (Hz), integration. Infrared (IR) spectra were obtained using FTIR spectrophotometers with material loaded onto a NaCl plate. The mass spectral data were

---

<sup>1</sup> Pangborn, A. B.; Giardello, M. A.; Grubbs, R. H.; Rosen, R. K.; Timmers, F. J. *Organometallics* **1996**, *15*, 1518.

<sup>2</sup> Xiao, Q.; Tian, L.; Tan, R.; Xia, Y.; Qiu, D.; Zhang, Y.; Wang, J. *Org. Lett.* **2012**, *14*, 4230.

obtained at the University of Delaware mass spectrometry facility. Optical rotations were measured using a 2.5 mL cell with a 0.1 dm path length. Melting points were taken on a Stuart SMP10 instrument.

## Stereospecific Cross Coupling of Allylic Pivalates with Boroxines

### General Procedure for the Stereospecific, Nickel-Catalyzed Coupling of Allylic Pivalates with Boroxines

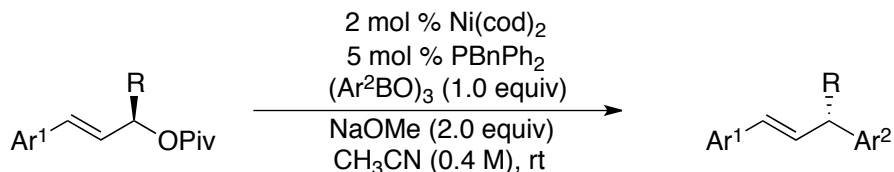

In a N<sub>2</sub>-atmosphere glovebox, Ni(cod)<sub>2</sub> (1.7 mg, 0.06 mmol, 2 mol %), benzyl diphenyl phosphine (4.2 mg, 0.015 mmol, 5 mol %) and NaOMe (32.5 mg, 0.6 mmol, 2.0 equiv) were weighed into a 1-dram vial. Allylic pivalate (0.30 mmol, 1.0 equiv) and boroxine (0.30 mmol, 1.0 equiv) were added, followed by acetonitrile (0.75 mL, 0.4 M). The vial was capped with a Teflon-lined cap and removed from the glovebox. The mixture was stirred at room temperature for the time specified below. The reaction mixture was then diluted with Et<sub>2</sub>O (1.5 mL) and filtered through a plug of silica gel, which was rinsed with Et<sub>2</sub>O (10 mL). The filtrate was concentrated and then purified by silica gel chromatography to give the arylated product.

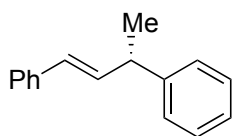

**(*S,E*)-But-1-ene-1,3-diylidibenzene (2).** Product **2** was prepared via the General Procedure using pivalate **1a** (prepared in 96% ee). The reaction was stirred at room temperature for 4 h. The crude material was purified by silica gel chromatography (100% hexanes) to give compound **2** (run 1: 55.6 mg, 89%; run 2: 54.3 mg, 87%) as colorless oil. The enantiomeric excess was determined to be 95% (run 1: 95% ee; run 2: 95% ee) by chiral HPLC analysis (CHIRALCEL OD-H, 1.0 mL/min, 0.1% *i*-PrOH/hexane  $\lambda=254$  nm);  $t_R(\text{major})=6.07$  min,  $t_R(\text{minor})=6.48$  min.  $[\alpha]_D^{24} = -21.1^\circ$  (c 1.42, CHCl<sub>3</sub>); <sup>1</sup>H NMR (400 MHz, CDCl<sub>3</sub>)  $\delta$  7.40 – 7.36 (m, 2H), 7.35 – 7.27 (m, 6H), 7.25 – 7.19 (m, 2H), 6.46 – 6.37 (m, 2H), 3.69 – 3.63(m, 1H), 1.49 (d,  $J = 7.0$  Hz, 3H); <sup>13</sup>C NMR (101 MHz, (CD<sub>3</sub>)<sub>2</sub>CO)  $\delta$  145.8, 137.6, 135.2, 128.5, 128.43, 128.40, 127.1,

127.0, 126.11, 126.07, 42.6, 20.9. The spectral data for this compound matches that reported in the literature.<sup>3</sup>

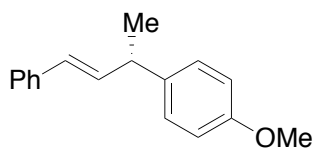

**(S)-2-(1-Phenylethyl)naphthalene (3).** Compound **3** was prepared via the General Procedure using pivalate **1a** (prepared in 96% ee). The crude material was purified by silica gel chromatography (2% Et<sub>2</sub>O/hexanes) to give compound **3** (run 1: 65.9 mg, 92%; run 2: 63.0 mg, 88%) as colorless oil. The enantiomeric excess was determined to be 88% (run 1: 87% ee; run 2: 89% ee) by chiral HPLC analysis (CHIRALCEL OD-H, 0.8 mL/min, 0.1% *i*-PrOH/hexane,  $\lambda=254$  nm);  $t_{\text{R}}(\text{major})=14.47$  min,  $t_{\text{R}}(\text{minor})=13.13$  min.  $[\alpha]_{\text{D}}^{24} = -2.8^{\circ}$  (c 3.56, CHCl<sub>3</sub>): <sup>1</sup>H NMR (400 MHz, CDCl<sub>3</sub>)  $\delta$  7.41 – 7.35 (m, 2H), 7.34 – 7.26 (m, 2H), 7.25 – 7.16 (m, 3H), 6.93 – 6.84 (m, 2H), 6.45 – 6.34 (m, 2H), 3.81 (s, 3H), 3.66 – 3.55 (m, 1H), 1.46 (d,  $J = 7.0$  Hz, 3H); <sup>13</sup>C NMR (101 MHz, CDCl<sub>3</sub>)  $\delta$  158.1, 137.8, 137.7, 135.7, 128.6, 128.39, 128.36, 127.2, 126.3, 114.0, 55.4, 41.9, 21.5. The spectral data for this compound matches that reported in the literature.<sup>4</sup>

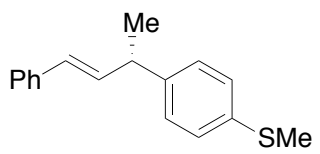

**((S,E)-Methyl(4-(4-phenylbut-3-en-2-yl)phenyl)sulfane (4).** Compound **4** was prepared via the General Procedure using pivalate **1a** (prepared in 96% ee). The crude material was purified by silica gel chromatography (100% hexanes) to give compound **4** (run 1: 73.2 mg, 96%; run 2: 70.6 mg, 93%) as a white amorphous solid (mp 49–51 °C). The enantiomeric excess was determined to be 93% (run 1: 93% ee; run 2: 92% ee) by chiral HPLC analysis (CHIRALPAK IA, 1.0 mL/min, 100% hexanes,  $\lambda=254$  nm);  $t_{\text{R}}(\text{major})=13.90$  min,  $t_{\text{R}}(\text{minor})=17.71$  min.  $[\alpha]_{\text{D}}^{24} = -8.3^{\circ}$  (c 1.44, CHCl<sub>3</sub>): <sup>1</sup>H NMR (600 MHz, (CD<sub>3</sub>)<sub>2</sub>CO)  $\delta$  7.43 – 7.38 (m, 2H), 7.32 – 7.16 (m, 7H), 6.48 – 6.44 (m, 2H), 3.68 – 3.60 (m, 1H), 2.46 (s, 3H), 1.43 (d,  $J = 7.0$  Hz, 3H); <sup>13</sup>C NMR (151 MHz,

<sup>3</sup> Sanz, R.; Miguel, D.; Martínez, A.; Álvarez-Gutiérrez, J. M.; Rodríguez, F. *Org. Lett.* **2007**, *9*, 727.

<sup>4</sup> Malkov, A. V.; Davis, S. L.; Baxendale, I. R.; Mitchell, W. L.; Kocovský, P. *J. Org. Chem.* **1999**, *64*, 2751.

CDCl<sub>3</sub>)  $\delta$  142.8, 137.5, 135.9, 135.0, 128.6, 128.5, 127.9, 127.2, 127.1, 126.2, 42.1, 21.2, 16.3; FTIR (NaCl/thin film) 3023, 2963, 2920, 2869, 1891, 1799, 1598, 1493, 1446, 1010, 964, 746; HRMS (EI+) [M]<sup>+</sup> calculated for C<sub>17</sub>H<sub>18</sub>S: 254.1129, found: 254.1134.

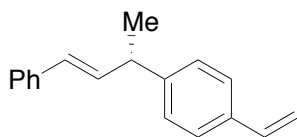

**(*S,E*)-1-(4-Phenylbut-3-en-2-yl)-4-vinylbenzene (5).**

Compound **5** was prepared via the General Procedure using pivalate **1a** (prepared in 96% ee). The crude material was purified by silica gel chromatography (100% hexanes) to give compound **5** (run 1: 65.4 mg, 93%; run 2: 64.8 mg, 92%) as yellow oil. The enantiomeric excess was determined to be 91% (run 1: 91% ee; run 2: 91% ee) by chiral HPLC analysis (CHIRALPAK IA, 1.0 mL/min, 100% hexanes,  $\lambda$ =254 nm);  $t_R$ (major)=7.82 min,  $t_R$ (minor)=9.24 min.  $[\alpha]_D^{24} = -22.6^\circ$  (c 2.21, CHCl<sub>3</sub>): <sup>1</sup>H NMR (400 MHz, CDCl<sub>3</sub>)  $\delta$  7.43 – 7.35 (m, 4H), 7.33 – 7.17 (m, 5H), 6.73 (dd,  $J = 17.6, 10.9$  Hz, 1H), 6.49 – 6.34 (m, 2H), 5.75 (dd,  $J = 17.6, 1.0$  Hz, 1H), 5.23 (dd,  $J = 10.8, 1.0$  Hz, 1H), 3.66 (qd,  $J = 6.9, 5.4$  Hz, 1H), 1.48 (d,  $J = 7.0$  Hz, 3H); <sup>13</sup>C NMR (101 MHz, CDCl<sub>3</sub>)  $\delta$  145.5, 137.7, 136.7, 135.8, 135.2, 128.74, 128.67, 127.6, 127.3, 126.5, 126.3, 113.4, 42.5, 21.3; FTIR (NaCl/thin film) 3023, 2964, 2928, 1629, 1509, 1494, 965, 838, 746 cm<sup>-1</sup>; HRMS (EI+) [M]<sup>+</sup> calculated for C<sub>18</sub>H<sub>18</sub>: 234.1409, found: 234.1412.

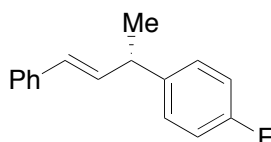

**(*S,E*)-1-Fluoro-4-(4-phenylbut-3-en-2-yl)benzene (6).**

Compound **6** was prepared via the General Procedure using pivalate **1a** (prepared in 95% ee). The crude material was purified by silica gel chromatography (100% hexanes) to give compound **6** (run 1: 57.6 mg, 87%; run 2: 58.9 mg, 85%) as a yellow oil. The enantiomeric excess was determined to be 93% (run 1: 93% ee; run 2: 93% ee) by chiral HPLC analysis (CHIRALPAK IB, 1.0 mL/min, 100% hexanes,  $\lambda$ =254 nm);  $t_R$ (major)=7.86 min,  $t_R$ (minor)=7.41 min.  $[\alpha]_D^{24} = -15.4^\circ$  (c 2.34, CHCl<sub>3</sub>): <sup>1</sup>H NMR (400 MHz, CDCl<sub>3</sub>)  $\delta$  7.41 – 7.18 (m, 7H), 7.07 – 6.97 (m, 2H), 6.46 – 6.31 (m, 2H), 3.69 – 3.60 (m, 1H), 1.47 (d,  $J = 7.0$  Hz, 3H); <sup>13</sup>C NMR (101 MHz, CDCl<sub>3</sub>)  $\delta$  161.5 (d,  $J_{C-F} = 243.8$  Hz), 141.4 (d,  $J_{C-F} = 3.2$  Hz), 137.5, 135.1, 128.9, 128.8 (d,  $J_{C-F} = 1.4$  Hz), 128.7,

127.3, 126.3, 115.4 (d,  $J_{C-F} = 21.0$  Hz), 42.0, 21.5. The spectral data for this compound matches that reported in the literature.<sup>5</sup>

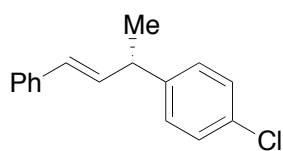

**(*S,E*)-1-Chloro-4-(4-phenylbut-3-en-2-yl)benzene (7).**

Compound **7** was prepared via the General Procedure using pivalate **1a** (prepared in 96% ee). The crude material was purified by silica gel chromatography (100% hexanes) to give compound **7** (run 1: 53.7 mg, 74%; run 2: 54.6 mg, 75%) as a yellow oil. The enantiomeric excess was determined to be 94% (run 1: 94% ee; run 2: 94% ee) by chiral HPLC analysis (CHIRALPAK IA, 1.0 mL/min, 100% hexanes,  $\lambda = 254$  nm);  $t_R(\text{major}) = 7.38$  min,  $t_R(\text{minor}) = 8.11$  min.  $[\alpha]_D^{24} = -13.9^\circ$  (c 3.36  $\text{CHCl}_3$ ):  $^1\text{H NMR}$  (400 MHz,  $\text{CDCl}_3$ )  $\delta$  7.41 – 7.28 (m, 6H), 7.25 – 7.18 (m, 3H), 6.46 – 6.29 (m, 2H), 3.68 – 3.59 (m, 1H), 1.46 (d,  $J = 7.0$  Hz, 3H);  $^{13}\text{C NMR}$  (101 MHz,  $\text{CDCl}_3$ )  $\delta$  144.2, 137.5, 134.7, 132.0, 129.0, 128.9, 128.74, 128.71, 127.4, 126.3, 42.1, 21.3. The spectral data for this compound matches that reported in the literature.<sup>6</sup>

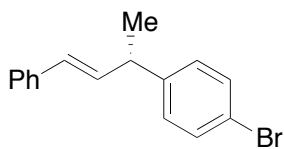

**(*S,E*)-1-Bromo-4-(4-phenylbut-3-en-2-yl)benzene (8).**

Compound **8** was prepared via the General Procedure using pivalate **1a** (prepared in 96% ee). The crude material was purified by silica gel chromatography (100% hexanes) to give compound **7** (run 1: 53.4 mg, 62%; run 2: 54.2 mg, 63%) as a yellow oil. The enantiomeric excess was determined to be 96% (run 1: 96% ee; run 2: 95% ee) by chiral HPLC analysis (CHIRALPAK IA, 1.0 mL/min, 100% hexanes,  $\lambda = 254$  nm);  $t_R(\text{major}) = 8.22$  min,  $t_R(\text{minor}) = 9.44$  min.  $[\alpha]_D^{24} = -5.8^\circ$  (c 1.38,  $\text{CHCl}_3$ ):  $^1\text{H NMR}$  (400 MHz,  $\text{CDCl}_3$ )  $\delta$  7.47 – 7.42 (m, 2H), 7.38 – 7.34 (m, 2H), 7.30 (dd,  $J = 8.5, 6.7$  Hz, 2H), 7.24 – 7.19 (m, 1H), 7.18 – 7.13 (m, 2H), 6.47 – 6.29 (m, 2H), 3.66 – 3.57 (m, 1H), 1.45 (d,  $J = 7.0$  Hz, 3H);  $^{13}\text{C NMR}$  (101 MHz,  $\text{CDCl}_3$ )  $\delta$  144.7, 137.4, 134.6, 131.7, 129.3,

<sup>5</sup> Mauleón, P.; Carretero, J. C. *Org. Lett.* **2004**, 6, 3195.

<sup>6</sup> Li, M.-B.; Wang, Y.; Tian, S.-K. *Angew. Chem. Int. Ed.* **2012**, 51, 2968.

129.1, 128.7, 127.4, 126.3, 120.1, 42.2, 21.3. The spectral data for this compound matches that reported in the literature.<sup>7</sup>

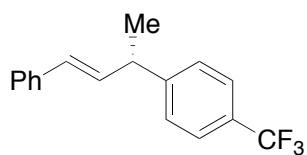

**(*S,E*)-1-(4-Phenylbut-3-en-2-yl)-4-(trifluoromethyl)benzene**

**(9).** Compound **9** was prepared via the General Procedure using pivalate **1a** (prepared in 96% ee). The crude material was purified by silica gel chromatography (100% hexanes) to give compound **9** (run 1: 64.6 mg, 78%; run 2: 63.8 mg, 77%) as a colorless oil. The enantiomeric excess was determined to be 91% (run 1: 90% ee; run 2: 91% ee) by chiral HPLC analysis (CHIRALCEL OD-H, 0.6 mL/min, 0.1% *i*-PrOH/hexane,  $\lambda=254$  nm);  $t_R(\text{major})=11.14$  min,  $t_R(\text{minor})=12.14$  min.  $[\alpha]_D^{24} = -9.4^\circ$  (c 2.32, CHCl<sub>3</sub>); <sup>1</sup>H NMR (400 MHz, CDCl<sub>3</sub>)  $\delta$  7.58 (d,  $J = 8.1$  Hz, 2H), 7.43 – 7.35 (m, 4H), 7.31 (dd,  $J = 8.5, 6.7$  Hz, 2H), 7.25 – 7.19 (m, 1H), 6.47 – 6.32 (m, 2H), 3.76 – 3.68 (m, 1H), 1.49 (d,  $J = 7.0$  Hz, 3H); <sup>13</sup>C NMR (101 MHz, CDCl<sub>3</sub>)  $\delta$  149.8 (q,  $J_{C-F} = 1.3$  Hz), 137.3, 134.2, 129.5, 128.72, 128.69 (q,  $J_{C-F} = 32.2$  Hz), 127.8, 127.5, 125.6 (q,  $J_{C-F} = 3.8$  Hz), 124.5 (q,  $J_{C-F} = 271.6$  Hz), 120.4, 42.6, 21.2. The spectral data for this compound matches that reported in the literature.<sup>8</sup>

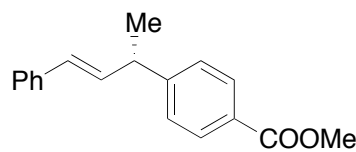

**(*S,E*)-Methyl 4-(4-phenylbut-3-en-2-yl)benzoate (10).**

Compound **10** was prepared via the General Procedure using pivalate **1a** (prepared in 96% ee). The crude material was purified by silica gel chromatography (5% Et<sub>2</sub>O/hexanes) to give compound **10** (run 1: 75.1 mg, 94%; run 2: 73.4mg, 92%) as a colorless oil. The enantiomeric excess was determined to be 89% (run 1: 89% ee; run 2: 89% ee) by chiral HPLC analysis (CHIRALPAK IA, 0.8 mL/min, 1% *i*-PrOH/hexane,  $\lambda=254$  nm);  $t_R(\text{major})=21.99$  min,  $t_R(\text{minor})=19.68$  min.  $[\alpha]_D^{24} = -30.2^\circ$  (c 2.91, CHCl<sub>3</sub>):

<sup>7</sup> Zhou, T.; Peters, B.; Maldonado, M. F.; Govender, T.; Andersson, P. G. *J. Am. Chem. Soc.* **2012**, 134, 13592.

<sup>8</sup> Zhao, J.; Ye, J.; Zhang, Y. *J. Adv. Synth. Catal.* **2013**, 355, 491.



$^1\text{H}$  NMR (400 MHz,  $\text{CDCl}_3$ )  $\delta$  8.07 – 7.97 (m, 2H), 7.43 – 7.28 (m, 6H), 7.25 – 7.18 (m, 1H), 6.50 – 6.30 (m, 2H), 3.92 (s, 3H), 3.75 – 3.67 (m, 1H), 1.49 (d,  $J = 7.0$  Hz, 3H);  $^{13}\text{C}$  NMR (101 MHz,  $\text{CDCl}_3$ )  $\delta$  167.2, 151.1, 137.4, 134.3, 130.0, 129.3, 128.7, 128.3, 127.5, 127.4, 126.3, 52.2, 42.8, 21.2. The spectral data for this compound matches that reported in the literature.<sup>9</sup>

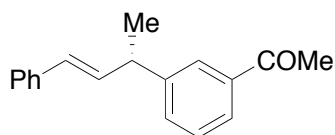

**(*S,E*)-1-(3-(4-Phenylbut-3-en-2-yl)phenyl)ethanone (11).**

Compound **11** was prepared via the General Procedure using pivalate **1a** (prepared in 95% ee). The crude material was purified by silica gel chromatography (6%  $\text{Et}_2\text{O}$ /hexanes) to give compound **11** (run 1: 65.4 mg, 87%; run 2: 64.2 mg, 85%) as a colorless oil. The enantiomeric excess was determined to be 91% ee (run 1: 91% ee; run 2: 91% ee) by chiral HPLC analysis (CHIRALPAK IB, 1.0 mL/min, 0.5% *i*-PrOH/hexane,  $\lambda=254$  nm);  $t_{\text{R}}(\text{major})=18.72$  min,  $t_{\text{R}}(\text{minor})=21.37$  min.  $[\alpha]_{\text{D}}^{24} = -26.1^\circ$  (c 2.64,  $\text{CHCl}_3$ ):  $^1\text{H}$  NMR (400 MHz,  $\text{CDCl}_3$ )  $\delta$  7.88 (t,  $J = 1.8$  Hz, 1H), 7.81 (dt,  $J = 7.6$ , 1.5 Hz, 1H), 7.49 (dt,  $J = 7.7$ , 1.6 Hz, 1H), 7.42 (t,  $J = 7.6$  Hz, 1H), 7.39 – 7.34 (m, 2H), 7.33 – 7.27 (m, 2H), 7.24 – 7.18 (m, 1H), 6.57 – 6.22 (m, 2H), 3.76 – 3.68 (m, 1H), 2.62 (s, 3H), 1.50 (d,  $J = 7.0$  Hz, 3H);  $^{13}\text{C}$  NMR (101 MHz,  $\text{CDCl}_3$ )  $\delta$  198.5, 146.4, 137.5, 137.4, 134.6, 132.4, 129.2, 128.9, 128.7, 127.4, 127.1, 126.7, 126.3, 42.7, 26.9, 21.3; FTIR (NaCl/thin film) 3025, 2965, 2927, 1681, 1598, 1448, 1356, 1264, 966, 750, 693  $\text{cm}^{-1}$ ; HRMS (EI+)  $[\text{M}]^+$  calculated for  $\text{C}_{18}\text{H}_{18}\text{O}$ : 250.1358, found: 250.1376.

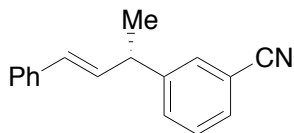

**(*S,E*)-3-(4-Phenylbut-3-en-2-yl)benzonitrile (12).** Compound

**12** was prepared via the General Procedure using pivalate **1a** (prepared in 96% ee). The crude material was purified by silica gel chromatography (2%  $\text{Et}_2\text{O}$ /hexanes) to give compound **12** (run 1: 60.2 mg, 85%; run 2: 58.4 mg, 83%) as a colorless oil. The enantiomeric excess was determined to be 93% (run 1: 92% ee; run 2: 93% ee) by chiral HPLC analysis (CHIRALPAK IA, 1.0 mL/min, 2.0% *i*-PrOH/hexane,  $\lambda=254$  nm);

<sup>9</sup> Liao, L.; Sigman, M. S. *J. Am. Chem. Soc.* **2010**, 132, 10209.

$t_R(\text{major})=9.53$  min,  $t_R(\text{minor})=10.52$  min.  $[\alpha]_D^{24} = -19.5^\circ$  (c 2.40,  $\text{CHCl}_3$ ):  $^1\text{H}$  NMR (400 MHz,  $\text{CDCl}_3$ )  $\delta$  7.57 (t,  $J = 1.7$  Hz, 1H), 7.52 (dd,  $J = 8.2, 1.4$  Hz, 2H), 7.46 – 7.28 (m, 5H), 7.26 – 7.20 (m, 1H), 6.48 – 6.40 (m, 1H), 6.31 (dd,  $J = 15.9, 6.7$  Hz, 1H), 3.73 – 3.64 (m, 1H), 1.48 (d,  $J = 7.0$  Hz, 3H);  $^{13}\text{C}$  NMR (101 MHz,  $\text{CDCl}_3$ )  $\delta$  147.1, 137.1, 133.6, 132.2, 131.1, 130.2, 129.8, 129.4, 128.7, 127.6, 126.3, 119.2, 112.6, 42.3, 21.1; FTIR (NaCl/thin film) 3025, 2967, 2930, 2228, 1590, 1481, 1446, 960, 798, 751  $\text{cm}^{-1}$ ; HRMS (EI+)  $[\text{M}]^+$  calculated for  $\text{C}_{17}\text{H}_{15}\text{N}$ : 233.1204, found: 233.1221.

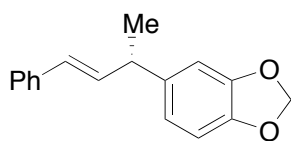

**(*S,E*)-5-(4-Phenylbut-3-en-2-yl)benzo[*d*][1,3]dioxole (13).**

Compound **13** was prepared via the General Procedure using pivalate **1a** (prepared in 96% ee). The crude material was purified by silica gel chromatography (2%  $\text{Et}_2\text{O}$ /hexanes) to give compound **13** (run 1: 67.3 mg, 89%; run 2: 65.1 mg, 86%) as a colorless oil. The enantiomeric excess was determined to be 92% (run 1: 92% ee; run 2: 91% ee) by chiral HPLC analysis (CHIRALPAK IA, 0.6 mL/min, 0.1% *i*-PrOH/hexane,  $\lambda=254$  nm);  $t_R(\text{major})=13.70$  min,  $t_R(\text{minor})=14.68$  min.  $[\alpha]_D^{24} = -7.7^\circ$  (c 2.98,  $\text{CHCl}_3$ ):  $^1\text{H}$  NMR (400 MHz,  $\text{CDCl}_3$ )  $\delta$  7.40 – 7.34 (m, 2H), 7.29 (dd,  $J = 8.5, 6.8$  Hz, 2H), 7.24 – 7.16 (m, 1H), 6.84 – 6.70 (m, 3H), 6.44 – 6.30 (m, 2H), 5.93 (s, 2H), 3.61 – 3.52 (m, 1H), 1.43 (d,  $J = 7.0$  Hz, 3H);  $^{13}\text{C}$  NMR (101 MHz,  $\text{CDCl}_3$ )  $\delta$  147.8, 146.0, 139.8, 137.6, 135.4, 128.6, 128.5, 127.2, 126.3, 120.2, 108.3, 108.0, 101.0, 42.4, 21.5; FTIR (NaCl/thin film) 3024, 2964, 2873, 2228, 1486, 1437, 1245, 1040, 938, 693  $\text{cm}^{-1}$ ; HRMS (EI+)  $[\text{M}]^+$  calculated for  $\text{C}_{17}\text{H}_{16}\text{O}_2$ : 252.1150, found: 252.1156.

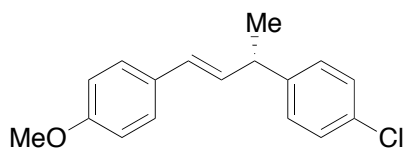

**(*S,E*)-1-Chloro-4-(4-(4-methoxyphenyl)but-3-en-2-yl)benzene (14).** Compound **14** was prepared via the General Procedure using pivalate **1b** (prepared in 82% ee). The crude material was purified by silica gel chromatography (4%  $\text{Et}_2\text{O}$ /hexanes) to give compound **14** (run 1: 68.2 mg, 83%; run 2: 62.5 mg, 82%) as a white solid (mp 58–61  $^\circ\text{C}$ ). The enantiomeric excess was determined to be 76% ee (run 1: 76% ee; run 2: 75% ee) by chiral HPLC analysis (CHIRALPAK IA, 0.8 mL/min, 0.1%

*i*-PrOH/hexane,  $\lambda=254$  nm);  $t_R(\text{major})=11.45$  min,  $t_R(\text{minor})=13.71$  min.  $[\alpha]_D^{24} = -8.3^\circ$  (c 1.07, CHCl<sub>3</sub>); <sup>1</sup>H NMR (400 MHz, CDCl<sub>3</sub>)  $\delta$  7.33 – 7.27 (m, 4H), 7.23 – 7.18 (m, 2H), 6.88 – 6.81 (m, 2H), 6.40 – 6.30 (m, 1H), 6.19 (dd,  $J = 15.9, 6.7$  Hz, 1H), 3.80 (s, 3H), 3.66 – 3.55 (m, 1H), 1.44 (d,  $J = 7.0$  Hz, 3H); <sup>13</sup>C NMR (101 MHz, CDCl<sub>3</sub>)  $\delta$  159.1, 144.5, 132.6, 131.9, 130.3, 128.9, 128.7, 128.4, 127.4, 114.1, 55.5, 42.1, 21.4; FTIR (NaCl/thin film) 3030, 2963, 2931, 2835, 1607, 1510, 1251, 1174, 1035, 816 cm<sup>-1</sup>; HRMS (EI+) [M]<sup>+</sup> calculated for C<sub>17</sub>H<sub>17</sub>ClO: 272.0968, found: 272.0960.

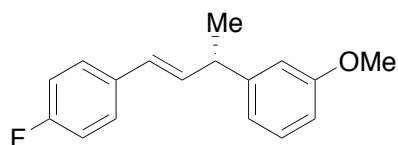

**(*S,E*)-1-(4-(4-Fluorophenyl)but-3-en-2-yl)-3-methoxybenzene (15).**

Compound **15** was prepared via the General Procedure using pivalate **1c** (prepared in 98% ee). The crude material was purified by silica gel chromatography (2% Et<sub>2</sub>O/hexanes) to give compound **15** (run 1: 69.4 mg, 90%; run 2: 68.2 mg, 89%) as a colorless oil. The enantiomeric excess was determined to be 91% (run 1: 91% ee; run 2: 91% ee) by chiral HPLC analysis (CHIRALPAK IB, 0.6 mL/min, 0.1% *i*-PrOH/hexane,  $\lambda=254$  nm);  $t_R(\text{major})=14.19$  min,  $t_R(\text{minor})=17.07$  min.  $[\alpha]_D^{24} = -18.9^\circ$  (c 2.80, CHCl<sub>3</sub>); <sup>1</sup>H NMR (400 MHz, CDCl<sub>3</sub>)  $\delta$  7.36 – 7.29 (m, 2H), 7.29 – 7.23 (m, 1H), 7.02 – 6.95 (m, 2H), 6.90 – 6.75 (m, 3H), 6.39 (d,  $J = 15.9$  Hz, 1H), 6.29 (dd,  $J = 15.9, 6.5$  Hz, 1H), 3.82 (s, 3H), 3.65 – 3.56 (m, 1H), 1.47 (d,  $J = 7.0$  Hz, 3H); <sup>13</sup>C NMR (101 MHz, CDCl<sub>3</sub>)  $\delta$  162.1 (d,  $J_{C-F} = 245.9$  Hz), 159.9, 147.4, 134.93 (d,  $J_{C-F} = 2.3$  Hz), 133.80 (d,  $J_{C-F} = 3.2$  Hz), 129.64, 127.72 (d,  $J_{C-F} = 7.8$  Hz), 127.53, 119.83, 115.47 (d,  $J_{C-F} = 21.5$  Hz), 113.46, 111.34, 55.33, 42.73, 21.30; FTIR (NaCl/thin film) 2964, 2834, 1600, 1508, 1259, 1227, 1157, 779 cm<sup>-1</sup>; HRMS (EI+) [M]<sup>+</sup> calculated for C<sub>17</sub>H<sub>17</sub>FO: 256.1263, found: 256.1252.

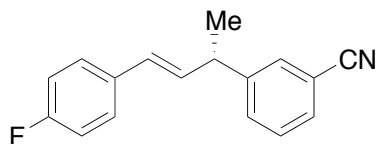

**(*S,E*)-3-(4-(4-Fluorophenyl)but-3-en-2-yl)benzonitrile (16).**

Compound **16** was prepared via the General Procedure using pivalate **1c** (prepared in 98% ee). The crude material was purified by silica gel chromatography (5% Et<sub>2</sub>O/hexanes) to give compound **16** (run 1: 56.4 mg, 75%; run 2: 55.2 mg, 73%) as a

colorless oil. The enantiomeric excess was determined to be 96% (run 1: 96% ee; run 2: 95% ee) by chiral HPLC analysis (CHIRALPAK IA, 1.0 mL/min, 0.1% *i*-PrOH/hexane,  $\lambda=254$  nm);  $t_R(\text{major})=11.64$  min,  $t_R(\text{minor})=12.68$  min.  $[\alpha]_D^{24} = -5.0^\circ$  (c 2.80, CHCl<sub>3</sub>): <sup>1</sup>H NMR (400 MHz, CDCl<sub>3</sub>)  $\delta$  7.61 – 7.47 (m, 3H), 7.42 (t,  $J = 7.7$  Hz, 1H), 7.36 – 7.29 (m, 2H), 7.03 – 6.96 (m, 2H), 6.38 (dd,  $J = 15.9, 1.3$  Hz, 1H), 6.22 (dd,  $J = 15.9, 6.8$  Hz, 1H), 3.74 – 3.61 (m, 1H), 1.47 (d,  $J = 7.0$  Hz, 3H); <sup>13</sup>C NMR (101 MHz, CDCl<sub>3</sub>)  $\delta$  162.3 (d,  $J_{C-F} = 246.6$  Hz), 147.0, 133.4 (d,  $J_{C-F} = 2.2$  Hz), 133.2 (d,  $J_{C-F} = 3.3$  Hz), 132.1, 131.1, 130.2, 129.5, 128.7, 127.8 (d,  $J_{C-F} = 8.0$  Hz), 119.2, 115.6 (d,  $J_{C-F} = 21.5$  Hz), 112.7, 42.3, 21.1; FTIR (NaCl/thin film) 3038, 2968, 2228, 1600, 1507, 1481 1227, 1157, 967, 816, 693 cm<sup>-1</sup>; HRMS (EI+)  $[M]^+$  calculated for C<sub>17</sub>H<sub>14</sub>FN: 251.1110, found: 251.1115.

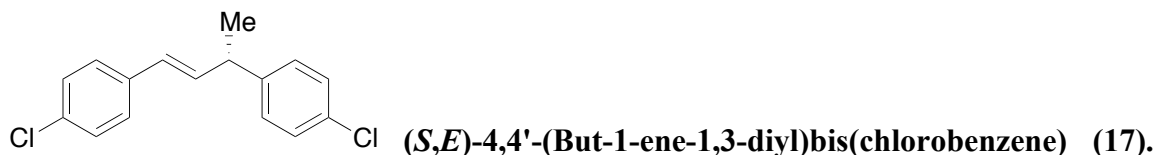

Compound **17** was prepared via the General Procedure using pivalate **1d** (prepared in 96% ee). The crude material was purified by silica gel chromatography (100% hexanes) to give compound **17** (run 1: 72.1 mg, 87%; run 2: 70.8 mg, 85%) as a white solid (mp 69–73 °C). The enantiomeric excess was determined to be 90% (run 1: 90% ee; run 2: 90% ee) by chiral HPLC analysis (CHIRALCEL OD-H, 0.4 mL/min, 100% hexanes,  $\lambda=254$  nm);  $t_R(\text{major})=26.72$  min,  $t_R(\text{minor})=24.66$  min.  $[\alpha]_D^{24} = -11.7^\circ$  (c 0.76, CHCl<sub>3</sub>): <sup>1</sup>H NMR (400 MHz, CDCl<sub>3</sub>)  $\delta$  7.34 – 7.22 (m, 6H), 7.23 – 7.15 (m, 2H), 6.41 – 6.24 (m, 2H), 3.61 (qd,  $J = 7.0, 4.8$  Hz, 1H), 1.44 (d,  $J = 7.0$  Hz, 3H); <sup>13</sup>C NMR (101 MHz, CDCl<sub>3</sub>)  $\delta$  143.9, 136.0, 135.5, 132.9, 132.2, 128.83, 128.81, 128.79, 127.9, 127.5, 42.1, 21.2. The spectral data for this compound matches that reported in the literature.<sup>10</sup>

X-ray quality crystals were obtained from an Et<sub>2</sub>O/hexanes mixture cooled to –18 °C. The crystal structure demonstrated that the absolute configuration is *S* (Fig S1).

<sup>10</sup> Sanz, R.; Miguel, D.; Martinez, A.; Álvarez-Gutierrez, J. M.; Rodriguez, F. *Org. Lett.* **2007**, *9*, 2027.

**Figure S1.** Molecular diagram of (*S*)-**17** with ellipsoids at 30% probability. H-atoms depicted with arbitrary radii. (CCDC-973168)

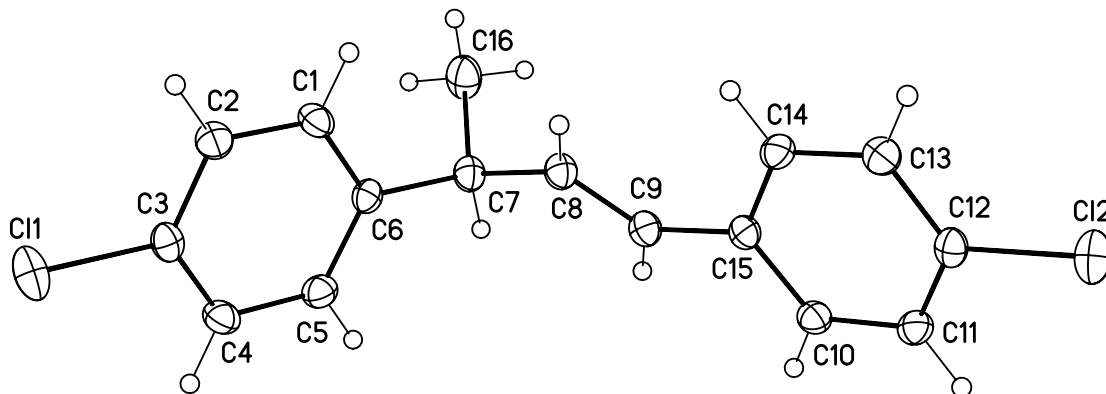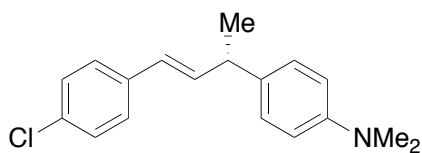

**(*S,E*)-4-(4-(4-Chlorophenyl)but-3-en-2-yl)-*N,N*-**

**dimethylaniline (18).** Compound **18** was prepared via the General Procedure using pivalate **1d** (prepared in 96% ee). The crude material was purified by silica gel chromatography (5% Et<sub>2</sub>O/hexanes) to give compound **18** (run 1: 71.8 mg, 84%; run 2: 70.2 mg, 82%) as a colorless oil. The enantiomeric excess was determined to be 89% (run 1: 89% ee; run 2: 88% ee) by chiral HPLC analysis (CHIRALPAK IA, 0.8 mL/min, 0.5% *i*-PrOH/hexane,  $\lambda=254$  nm);  $t_R(\text{major})=10.18$  min,  $t_R(\text{minor})=8.99$  min.  $[\alpha]_D^{24} = -14.8^\circ$  (c 0.74, CHCl<sub>3</sub>); <sup>1</sup>H NMR (400 MHz, CDCl<sub>3</sub>)  $\delta$  7.32 – 7.20 (m, 4H), 7.19 – 7.10 (m, 2H), 6.78 – 6.69 (m, 2H), 6.40 – 6.29 (m, 2H), 3.56 (qd,  $J = 7.0, 4.4$  Hz, 1H), 2.93 (s, 6H), 1.43 (d,  $J = 7.0$  Hz, 3H); <sup>13</sup>C NMR (101 MHz, CDCl<sub>3</sub>)  $\delta$  149.5, 137.0, 136.4, 133.4, 132.5, 128.7, 128.0, 127.5, 126.8, 113.1, 41.7, 41.0, 21.3; FTIR (NaCl/thin film) 2962, 2926, 2799, 1895, 1646, 1521, 1489 1403, 1090, 1011, 947, 809 cm<sup>-1</sup>; HRMS (EI+) [M]<sup>+</sup> calculated for C<sub>18</sub>H<sub>20</sub>ClN: 285.1284, found: 285.1260.

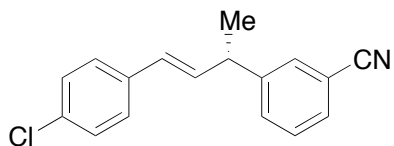

**(*S,E*)-3-(4-(4-Chlorophenyl)but-3-en-2-yl)benzonitrile**

**(19).** Compound **19** was prepared via the General Procedure using pivalate **1d** (prepared in 96% ee). The crude material was purified by silica gel chromatography (5% Et<sub>2</sub>O/hexanes) to give compound **19** (run 1: 69.6 mg, 87%; run 2: 68.3mg, 85%) as a colorless oil. The enantiomeric excess was determined to be 90% ee (run 1: 90% ee; run 2: 90% ee) by chiral HPLC analysis (CHIRALCEL OD-H, 0.8 mL/min, 1.0% *i*-PrOH/hexane,  $\lambda=254$  nm);  $t_R(\text{major})=15.06$  min,  $t_R(\text{minor})=17.46$  min.  $[\alpha]_D^{24} = -22.1^\circ$  (c 2.76, CHCl<sub>3</sub>); <sup>1</sup>H NMR (400 MHz, CDCl<sub>3</sub>)  $\delta$  7.56 – 7.48 (m, 3H), 7.45 – 7.40 (m, 1H), 7.27 (s, 4H), 6.37 (dd,  $J = 15.9, 1.1$  Hz, 1H), 6.28 (dd,  $J = 15.9, 6.5$  Hz, 1H), 3.71 – 3.63 (m, 1H), 1.47 (d,  $J = 7.0$  Hz, 3H); <sup>13</sup>C NMR (101 MHz, CDCl<sub>3</sub>)  $\delta$  146.9, 135.6, 134.3, 133.2, 132.1, 131.1, 130.3, 129.5, 128.9, 128.7, 127.6, 119.2, 112.7, 42.3, 21.0; FTIR (NaCl/thin film) 3028, 2967, 2871, 2229, 1896, 1581, 1490, 1091, 968 cm<sup>-1</sup>; HRMS (EI+) [M]<sup>+</sup> calculated for C<sub>17</sub>H<sub>14</sub>ClN: 267.0815, found: 267.0807.

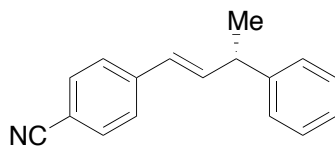

**(*S,E*)-4-(3-Phenylbut-1-en-1-yl)benzonitrile** **(20).**

Compound **20** was prepared via the General Procedure using pivalate **1e** (prepared in 80% ee). The crude material was purified by silica gel chromatography (5% Et<sub>2</sub>O/hexanes) to give compound **20** (run 1: 60.2 mg, 86%; run 2: 58.6 mg, 84%) as a colorless oil. The enantiomeric excess was determined to be 76% (run 1: 76% ee; run 2: 76% ee) by chiral HPLC analysis (CHIRALPAK IA, 0.8 mL/min, 1.0% *i*-PrOH/hexane,  $\lambda=254$  nm);  $t_R(\text{major})=15.73$  min,  $t_R(\text{minor})=14.13$  min.  $[\alpha]_D^{24} = -51.7^\circ$  (c 2.28, CHCl<sub>3</sub>); <sup>1</sup>H NMR (400 MHz, CDCl<sub>3</sub>)  $\delta$  7.57 (d,  $J = 8.4$  Hz, 2H), 7.42 (d,  $J = 8.3$  Hz, 2H), 7.38 – 7.31 (m, 2H), 7.27 – 7.21 (m, 3H), 6.54 (dd,  $J = 15.9, 6.7$  Hz, 1H), 6.41 (dd,  $J = 15.8, 1.3$  Hz, 1H), 3.75 – 3.63 (m, 1H), 1.49 (d,  $J = 7.0$  Hz, 3H); <sup>13</sup>C NMR (101 MHz, CDCl<sub>3</sub>)  $\delta$  144.8, 142.2, 139.6, 132.5, 128.8, 127.4, 127.3, 126.8, 126.7, 119.3, 110.3, 42.9, 21.1; FTIR (NaCl/thin film) 3060, 3027, 2967, 2225, 1645, 1581, 1492, 1299, 1012, 969, 819 cm<sup>-1</sup>; HRMS (EI+) [M]<sup>+</sup> calculated for C<sub>17</sub>H<sub>15</sub>N: 233.1204, found: 233.1230.

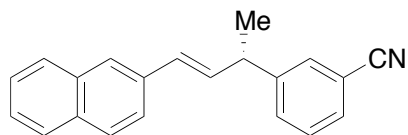

**(*S,E*)-3-(4-(Naphthalen-2-yl)but-3-en-2-**

**yl)benzonitrile (21).** Compound **21** was prepared via the General Procedure using pivalate **1f** (prepared in 96% ee). The crude material was purified by silica gel chromatography (6% Et<sub>2</sub>O/hexanes) to give compound **21** (run 1: 66.5 mg, 78%; run 2: 64.2 mg, 76%) as a white solid (mp 90–92 °C). The enantiomeric excess was determined to be 91% (run 1: 90% ee; run 2: 91% ee) by chiral HPLC analysis (CHIRALPAK IB, 1.0 mL/min, 1.0% *i*-PrOH/hexane, λ=254 nm); *t*<sub>R</sub>(major)=18.77 min, *t*<sub>R</sub>(minor)=23.33 min. [α]<sub>D</sub><sup>24</sup> = –17.8° (c 0.56, CHCl<sub>3</sub>); <sup>1</sup>H NMR (400 MHz, CDCl<sub>3</sub>) δ 7.83 – 7.75 (m, 3H), 7.71 (s, 1H), 7.63 – 7.51 (m, 4H), 7.50 – 7.40 (m, 3H), 6.59 (d, *J* = 15.9 Hz, 1H), 6.44 (dd, *J* = 15.9, 6.8 Hz, 1H), 3.78 – 3.69 (m, 1H), 1.52 (d, *J* = 7.0 Hz, 3H); <sup>13</sup>C NMR (101 MHz, CDCl<sub>3</sub>) δ 147.1, 134.6, 134.1, 133.7, 133.0, 132.2, 131.2, 130.3, 130.0, 129.5, 128.4, 128.1, 127.8, 126.5, 126.2, 126.0, 123.6, 119.2, 112.7, 42.5, 21.2; FTIR (NaCl/thin film) 3057, 2967, 2927, 2228, 1627, 1597, 1481, 1267, 934, 813, 747, 694 cm<sup>-1</sup>; HRMS (EI+) [M]<sup>+</sup> calculated for C<sub>21</sub>H<sub>17</sub>N: 283.1361, found: 283.1335.

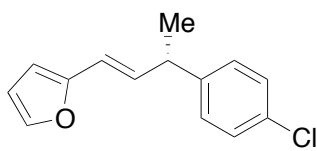

**(*S,E*)-2-(3-(4-chlorophenyl)but-1-en-1-yl)furan (22).**

Compound **22** was prepared via the General Procedure using pivalate **1g** (prepared in 97% ee). The crude material was purified by silica gel chromatography (100% hexanes) to give compound **22** (56.8mg mg, 82%) as a colorless oil. The enantiomeric excess was determined to be 86% by chiral HPLC analysis (CHIRALCEL OD-H, 0.8 mL/min, 100% hexanes, λ=254 nm); *t*<sub>R</sub>(major)=10.25 min, *t*<sub>R</sub>(minor)=11.07 min. [α]<sub>D</sub><sup>24</sup> = –48.5° (c 1.38, CHCl<sub>3</sub>); <sup>1</sup>H NMR (600 MHz, CDCl<sub>3</sub>) δ 7.31 – 7.30 (m, 1H), 7.29 – 7.26 (m, 2H), 7.19 – 7.16 (m, 2H), 6.34 (dd, *J* = 3.3, 1.8 Hz, 1H), 6.30 (dd, *J* = 15.9, 6.7 Hz, 1H), 6.20 – 6.13 (m, 2H), 3.65 – 3.53 (m, 1H), 1.42 (d, *J* = 7.0 Hz, 3H); <sup>13</sup>C NMR (151 MHz, CDCl<sub>3</sub>) δ 153.0, 144.0, 141.7, 133.7, 132.1, 128.9, 128.8, 117.9, 111.4, 107.1, 41.9, 21.2; FTIR (NaCl/thin film) 2966, 2928, 2871, 1897, 1491 1454, 1150, 1094, 1012, 963, 826, 733 cm<sup>-1</sup>; HRMS (EI+) [M]<sup>+</sup> calculated for C<sub>14</sub>H<sub>13</sub>ClO: 232.0655, found: 232.0667.

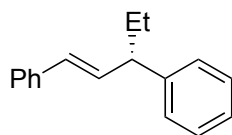

**(S,E)-Pent-1-ene-1,3-diylidibenzene (23).** Compound **23** was

prepared via the General Procedure using pivalate **1h** (prepared in 90% ee). The crude material was purified by silica gel chromatography (100% hexanes) to give compound **23** (run 1: 52.7 mg, 79%; run 2: 54.7 mg, 82%) as a colorless oil. The enantiomeric excess was determined to be 82% (run 1: 82% ee; run 2: 81% ee) by chiral HPLC analysis (CHIRALCEL OD-H, 0.4 mL/min, 0.1% *i*-PrOH/hexane,  $\lambda=254$  nm);  $t_R(\text{major})=13.87\text{min}$ ,  $t_R(\text{minor})=14.76$  min.  $[\alpha]_D^{24} = -15.1^\circ$  (c 1.45,  $\text{CHCl}_3$ ):  $^1\text{H NMR}$  (600 MHz,  $\text{CDCl}_3$ )  $\delta$  7.37 – 7.33 (m, 2H), 7.33 – 7.30 (m, 2H), 7.29 – 7.25 (m, 4H), 7.24 – 7.18 (m, 2H), 6.41 (d,  $J = 15.9$  Hz, 1H), 6.35 (dd,  $J = 15.9, 7.6$  Hz, 1H), 3.32 (q,  $J = 7.5$  Hz, 1H), 1.91 – 1.78 (m, 2H), 0.93 (t,  $J = 7.4$  Hz, 3H);  $^{13}\text{C NMR}$  (101 MHz,  $(\text{CD}_3)_2\text{CO}$ )  $\delta$  145.7, 138.6, 135.1, 130.2, 129.30, 129.27, 128.4, 127.8, 126.94, 126.90, 52.0, 29.7, 12.5. The spectral data for this compound matches that reported in the literature.<sup>11</sup>

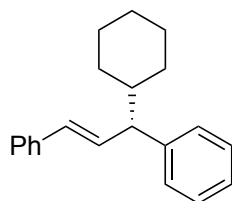

**(R,E)-(3-Cyclohexylpent-1-en-1-yl)benzene (24).** Compound **24** was

prepared via the General Procedure using pivalate **1i** (prepared in 87% ee). The crude material was purified by silica gel chromatography (0.5%  $\text{Et}_2\text{O}$ /hexanes) to give compound **24** (run 1: 73.8 mg, 89%; run 2: 76.2 mg, 92%) as a colorless oil. The enantiomeric excess was determined to be 62% (run 1: 62% ee; run 2: 61% ee) by chiral HPLC analysis (CHIRALCEL OD-H, 0.8 mL/min, 100% hexanes,  $\lambda=254$  nm);  $t_R(\text{major})=8.46\text{min}$ ,  $t_R(\text{minor})=8.04\text{min}$ .  $[\alpha]_D^{24} = -6.8^\circ$  (c 1.89,  $\text{CHCl}_3$ ):  $^1\text{H NMR}$  (400 MHz,  $\text{CDCl}_3$ )  $\delta$  7.38 – 7.25 (m, 5H), 7.24 – 7.15 (m, 5H), 6.49 – 6.19 (m, 2H), 3.08 (dt,  $J = 8.8, 4.5$  Hz, 1H), 2.00 – 1.88 (m, 1H), 1.79 – 1.60 (m, 4H), 1.52 – 1.42 (m, 1H), 1.31 – 1.08 (m, 3H), 1.06 – 0.78 (m, 2H);  $^{13}\text{C NMR}$  (101 MHz,  $\text{CDCl}_3$ )  $\delta$  144.2, 137.8, 133.4,

<sup>11</sup> Sarkar, S. M.; Uozumi, Y.; Yamada, Y. M. A. *Angew. Chem. Int. Ed.* **2011**, 50, 9437.



130.3, 128.59, 128.58, 128.1, 127.1, 126.3, 126.2, 56.9, 42.8, 33.2, 31.7, 31.6, 26.8, 26.5.  
The spectral data for this compound matches that reported in the literature.<sup>12</sup>

### Benchtop Experiment: Preparation of (*S,E*)-But-1-ene-1,3-diylidibenzene (**2**)

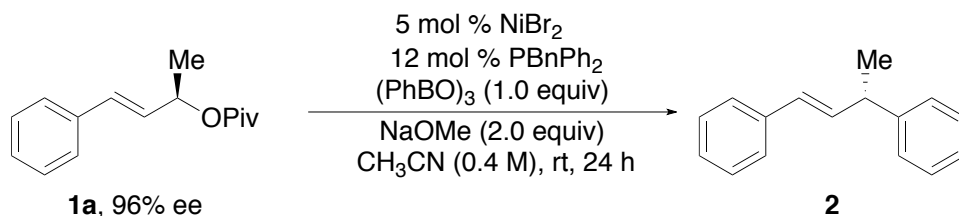

This experiment, including weighing of reagents, was conducted entirely on the benchtop without the use of a glovebox. NiBr<sub>2</sub> (5.5 mg, 0.025 mmol, 5 mol %), benzyldiphenyl phosphine (16.6 mg, 0.06 mmol, 12 mol %) and NaOMe (54.03 mg, 1.0 mmol, 2.0 equiv) were weighed into a 1-dram vial. Pivalate **1a** (116.2 mg, 0.5 mmol, 1.0 equiv, 96% ee), phenylboroxine (156 mg, 0.5 mmol, 1.0 equiv) and zinc (32.6 mg, 0.5 mmol, 1.0 equiv) were added. Capped with a Teflon-lined cap, the vial was evacuated and backfilled with N<sub>2</sub> three times. Acetonitrile (1.25 mL, 0.4 M) was then added. The mixture was stirred for 24 h at room temperature. The reaction mixture was then diluted with Et<sub>2</sub>O (3.0 mL) and filtered through a plug of silica gel, which was rinsed with Et<sub>2</sub>O (15 mL). The filtrate was concentrated and purified by silica gel chromatography (100% hexanes) to give compound **2** (54.4 mg, 53%) as a colorless oil. The enantiomeric excess of the product was determined to be 93% by chiral HPLC analysis.

### Cross Coupling of Pivalate **27**

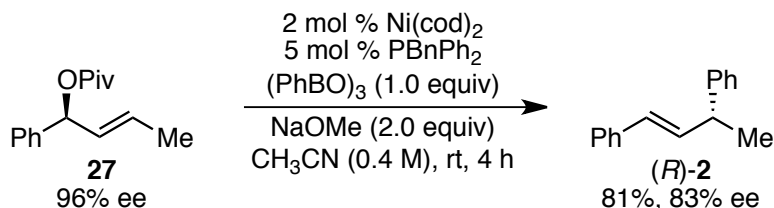

The arylation of **27** was performed according to the General Procedure, but on a 0.2-mmol scale. In a N<sub>2</sub>-atmosphere glovebox, Ni(cod)<sub>2</sub> (1.1 mg, 0.04 mmol, 2 mol %),

<sup>12</sup> Miranda, M. A.; Pérez-Prieto, J.; Font-Sanchis, E.; Kónya, K.; Scaiano, J. C. *J. Org. Chem.* **1997**, *62*, 5713.

benzyl diphenyl phosphine (2.8 mg, 0.010 mmol, 5 mol %) and NaOMe (21.7 mg, 0.40 mmol, 2.0 equiv) were weighed into a 1-dram vial. Allylic pivalate **27** (46.5 mg, 96% ee, 0.20 mmol, 1.0 equiv) and phenylboroxine (62.2 mg, 0.20 mmol, 1.0 equiv) were added, followed by acetonitrile (0.5 mL, 0.4 M). The vial was capped with a Teflon-lined cap and removed from the glovebox. The mixture was stirred at room temperature for 4 h. The reaction mixture was then diluted with Et<sub>2</sub>O (1.5 mL) and filtered through a plug of silica gel, which was rinsed with Et<sub>2</sub>O (10 mL). The filtrate was concentrated and purified by silica gel chromatography (1% Et<sub>2</sub>O/hexanes) to afford (*R*)-**2** (33.8 mg, 81%) as a colorless oil. The absolute configuration was determined by comparison to the HPLC trace and optical rotation of (*S*)-**2**. The enantiomeric excess was determined by chiral HPLC analysis (CHIRALCEL OD-H, 1.0 mL/min, 0.1% *i*-PrOH/hexane  $\lambda$ =254 nm);  $t_{R}(\text{major})=6.59$  min,  $t_{R}(\text{minor})=6.18$  min.  $[\alpha]_{D}^{24} = +12.9^{\circ}$  (c 1.39, CHCl<sub>3</sub>).

### Cross Coupling of Pivalate **28**

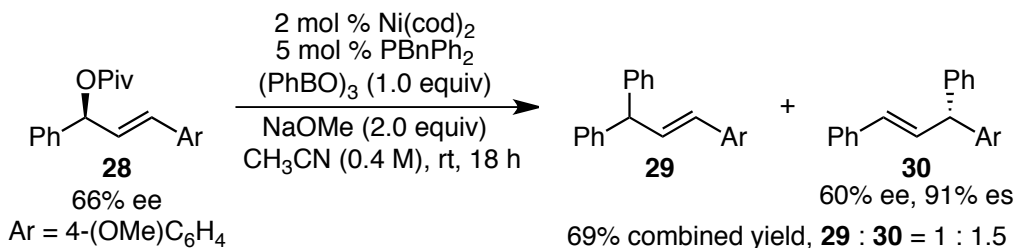

The arylation of **28** was performed according to the General Procedure, but on a 0.2-mmol scale. In a N<sub>2</sub>-atmosphere glovebox, Ni(cod)<sub>2</sub> (1.1 mg, 0.04 mmol, 2 mol %), benzyl diphenyl phosphine (2.8 mg, 0.010 mmol, 5 mol %) and NaOMe (21.7 mg, 0.40 mmol, 2.0 equiv) were weighed into a 1-dram vial. Allylic pivalate **28** (64.9 mg, 66% ee, 0.20 mmol, 1.0 equiv) and phenylboroxine (62.2 mg, 0.20 mmol, 1.0 equiv) were added, followed by acetonitrile (0.5 mL, 0.4 M). The vial was capped with a Teflon-lined cap and removed from the glovebox. The mixture was stirred at room temperature for 18 h. The reaction mixture was then diluted with Et<sub>2</sub>O (1.5 mL) and filtered through a plug of silica gel, which was rinsed with Et<sub>2</sub>O (10 mL). The filtrate was concentrated and purified by silica gel chromatography (5% Et<sub>2</sub>O/hexanes) to afford a 1: 1.5 mixture of **29**<sup>13</sup> and **30**<sup>14</sup> (41.7 mg, 69% combined yield) as colorless oil. The enantiomeric excess of

<sup>13</sup> Baba, A.; Kajioka, M.; Nishimoto, Y.; Saito, T.; Yasuda, M. *Chem. Comm.*, **2008**, 47, 6396.

**30** was determined by chiral HPLC analysis (CHIRALCEL OD-H, 0.4 mL/min, 0.1% *i*-PrOH/hexane  $\lambda=254$  nm);  $t_R(\text{major})=43.72$  min,  $t_R(\text{minor})=37.96$  min.  $[\alpha]_D^{24} = +22.6^\circ$  (c 0.66, CHCl<sub>3</sub>). The spectral data of each compound in the mixture matches that reported in the literature.<sup>13,14</sup>

---

<sup>14</sup> Ji, J.-X.; Li, M.-M.; Wei, W.; Yang, Y.-R.; Yue, H.-L. *Adv. Synth. Catal.* , **2011**, 1 353 , 3139.

## General Procedure for the Preparation of Allylic Pivalates: Preparation of (*R*)-4-Phenylbutan-2-yl Pivalate (**1a**)

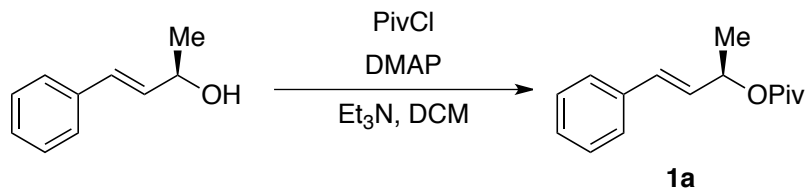

(*R*)-4-Phenyl-3-buten-2-ol (1.80 g, 12.2 mmol, 1.0 equiv, 96% ee) and DMAP (149.5 mg, 1.22 mmol, 0.10 equiv) were dissolved in CH<sub>2</sub>Cl<sub>2</sub> (20 mL, 0.61 M). Et<sub>3</sub>N (3.5 mL, 24.5 mmol, 2.0 equiv) and pivaloyl chloride (1.80 mL, 14.7 mmol, 1.2 equiv) were then added. The reaction mixture was then stirred for 15 h at room temperature, before H<sub>2</sub>O (20 mL) was added. The organic layer was extracted with CH<sub>2</sub>Cl<sub>2</sub> (2 x 40 mL). The combined organic layers were washed with aq. KOH (2.0 M, 40 mL), dried (MgSO<sub>4</sub>), filtered and concentrated. The resulting residue was purified by silica gel chromatography (5% Et<sub>2</sub>O/hexanes) to give compound **1a** (2.20 g, 77%) as a white solid (mp 47–50 °C). The enantiomeric excess was determined to be 96% by chiral HPLC analysis (CHIRALPAK IC, 0.8 mL/min, 1.0% *i*-PrOH/hexane, λ=254 nm); *t*<sub>R</sub>(major)=6.80 min, *t*<sub>R</sub>(minor)=8.01 min. [α]<sub>D</sub><sup>24</sup> = +106.1° (c 2.78, CHCl<sub>3</sub>): <sup>1</sup>H NMR (400 MHz, CDCl<sub>3</sub>) δ 7.40 – 7.35 (m, 2H), 7.34 – 7.28 (m, 2H), 7.25 – 7.21 (m, 1H), 6.59 (d, *J* = 16.0 Hz, 1H), 6.19 (dd, *J* = 16.0, 6.5 Hz, 1H), 5.54 – 5.46 (m, 1H), 1.39 (d, *J* = 6.5 Hz, 3H), 1.21 (s, 9H); <sup>13</sup>C NMR (151 MHz, CDCl<sub>3</sub>) δ 178.0, 136.6, 131.2, 129.3, 128.73, 128.70, 126.7, 70.7, 38.9, 27.3, 20.5; FTIR (NaCl/thin film) 2977, 2932, 1727, 1479, 1279, 1159, 1041, 965, 747, 692 cm<sup>-1</sup>; HRMS (EI) [M]<sup>+</sup> calculated for C<sub>15</sub>H<sub>20</sub>O<sub>2</sub>: 232.1463, found: 232.1479.

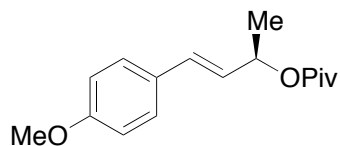

### (*R,E*)-4-(4-Methoxyphenyl)but-3-en-2-yl pivalate (**1b**).

Prepared according to the General Procedure on a 2.48 mmol scale to give **1b** (500 mg, 77%) as a white solid (mp 76–80 °C). The enantiomeric excess was determined to be 82% by chiral HPLC analysis (CHIRALPAK IC, 0.7 mL/min, 2.0% *i*-PrOH/hexane,

$\lambda=254$  nm);  $t_R(\text{major})=9.23$  min,  $t_R(\text{minor})=10.47$  min.  $[\alpha]_D^{24} = +116.1^\circ$  (c 1.08,  $\text{CHCl}_3$ ):  $^1\text{H}$  NMR (400 MHz,  $\text{CDCl}_3$ )  $\delta$  7.36 – 7.27 (m, 2H), 6.89 – 6.81 (m, 2H), 6.53 (d,  $J = 15.9$  Hz, 1H), 6.05 (dd,  $J = 15.9, 6.7$  Hz, 1H), 5.52 – 5.43 (m, 1H), 3.81 (s, 3H), 1.37 (d,  $J = 6.5$  Hz, 3H), 1.20 (s, 9H);  $^{13}\text{C}$  NMR (101 MHz,  $\text{CDCl}_3$ )  $\delta$  178.0, 159.5, 130.8, 129.4, 127.9, 127.1, 114.1, 70.9, 55.5, 38.9, 27.3, 20.6; FTIR (NaCl/thin film) 2830, 2821, 1714, 1573, 1380, 1080, 754  $\text{cm}^{-1}$ ; HRMS (EI+)  $[\text{M}]^+$  calculated for  $\text{C}_{16}\text{H}_{22}\text{O}_3$ : 262.1569, found: 262.1569.

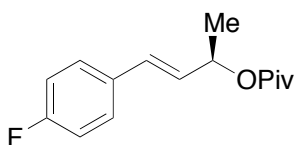

**(*R,E*)-4-(4-Fluorophenyl)but-3-en-2-yl pivalate (1c).** Prepared according to the General Procedure on a 3.32 mmol scale to give **1c** (660 mg, 79%) as a colorless oil. The enantiomeric excess was determined to be 98% by chiral HPLC analysis (CHIRALPAK IA, 1.0 mL/min, 2.0% *i*-PrOH/hexane,  $\lambda=254$  nm);  $t_R(\text{major})=4.66$  min,  $t_R(\text{minor})=5.49$  min.  $[\alpha]_D^{24} = +134.2^\circ$  (c 0.92,  $\text{CHCl}_3$ ):  $^1\text{H}$  NMR (400 MHz,  $\text{CDCl}_3$ )  $\delta$  7.38 – 7.30 (m, 2H), 7.05 – 6.96 (m, 2H), 6.55 (d,  $J = 16.0$  Hz, 1H), 6.10 (dd,  $J = 16.0, 6.5$  Hz, 1H), 5.53 – 5.44 (m, 1H), 1.38 (d,  $J = 6.5$  Hz, 3H), 1.24 – 1.19 (m, 9H);  $^{13}\text{C}$  NMR (101 MHz,  $\text{CDCl}_3$ )  $\delta$  177.9, 162.6 (d,  $J = 247.1$  Hz), 132.76 (d,  $J = 3.3$  Hz), 130.05, 129.02 (d,  $J = 2.3$  Hz), 128.2 (d,  $J = 8.0$  Hz), 115.6 (d,  $J = 21.6$  Hz), 70.6, 38.9, 27.3, 20.5; FTIR (NaCl/thin film) 2977, 2935, 2873, 1727, 1509, 1231, 1157, 1041  $\text{cm}^{-1}$ ; HRMS (EI+)  $[\text{M}]^+$  calculated for  $\text{C}_{15}\text{H}_{19}\text{FO}_2$ : 250.1369, found: 250.1388.

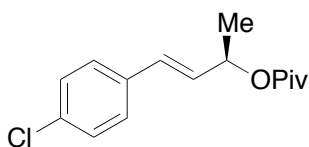

**(*R,E*)-4-(4-Chlorophenyl)but-3-en-2-yl pivalate (1d).** Prepared according to the General Procedure on a 5.40 mmol scale to give **1d** (1.3 g, 92%) as a white solid (mp 72–74 °C). The enantiomeric excess was determined to be 96% by chiral HPLC analysis (CHIRALPAK IA, 0.8 mL/min, 1.0% *i*-PrOH/hexane,  $\lambda=254$  nm);  $t_R(\text{major})=6.09$  min,  $t_R(\text{minor})=7.06$  min.  $[\alpha]_D^{24} = +150.8^\circ$  (c 0.68,  $\text{CHCl}_3$ ):  $^1\text{H}$  NMR (400 MHz,  $\text{CDCl}_3$ )  $\delta$  7.34 – 7.24 (m, 4H), 6.53 (dd,  $J = 15.9, 1.2$  Hz, 1H), 6.16 (dd,  $J = 16.0, 6.4$  Hz, 1H), 5.53 – 5.44 (m, 1H), 1.38 (d,  $J = 6.5$  Hz, 3H), 1.21 (s, 9H);  $^{13}\text{C}$  NMR (101 MHz,  $\text{CDCl}_3$ )  $\delta$  177.9, 135.1, 133.6, 130.0, 129.9, 128.9, 127.9, 70.5, 39.0,

27.3, 20.4; FTIR (NaCl/thin film) 2923, 2840, 1824, 1713, 1569, 1417, 1380, 1340, 1080  $\text{cm}^{-1}$ ; HRMS (EI+)  $[\text{M}]^+$  calculated for  $\text{C}_{15}\text{H}_{19}\text{ClO}_2$ : 266.1074, found: 266.1060.

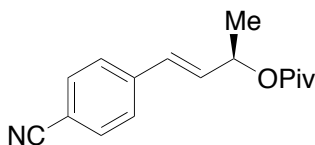

**(*R,E*)-4-(4-Cyanophenyl)but-3-en-2-yl pivalate (1e).**

Prepared according to the General Procedure on a 2.49 mmol scale to give **1e** (425 mg, 66%) as a white solid (mp 84–86 °C). The enantiomeric excess was determined to be 80% by chiral HPLC analysis (CHIRALPAK IC, 1.0 mL/min, 2.0% *i*-PrOH/hexane,  $\lambda=254$  nm);  $t_{\text{R}}(\text{major})=24.46$  min,  $t_{\text{R}}(\text{minor})=32.11$  min.  $[\alpha]_{\text{D}}^{24} = +115.0^\circ$  (c 1.00,  $\text{CHCl}_3$ ):  $^1\text{H}$  NMR (400 MHz,  $\text{CDCl}_3$ )  $\delta$  7.64 – 7.56 (m, 2H), 7.49 – 7.42 (m, 2H), 6.58 (d,  $J = 16.0$  Hz, 1H), 6.31 (dd,  $J = 16.0, 6.1$  Hz, 1H), 5.55 – 5.47 (m, 1H), 1.40 (d,  $J = 6.5$  Hz, 3H), 1.22 (s, 9H);  $^{13}\text{C}$  NMR (101 MHz,  $\text{CDCl}_3$ )  $\delta$  177.8, 141.1, 133.3, 132.7, 129.3, 127.2, 119.1, 111.2, 70.1, 39.0, 27.3, 20.3; FTIR (NaCl/thin film) 2978, 2935, 2872, 2227, 1717, 1604, 1480, 1282, 1173, 1039, 968  $\text{cm}^{-1}$ ; HRMS (EI+)  $[\text{M}]^+$  calculated for  $\text{C}_{16}\text{H}_{19}\text{NO}_2$ : 257.1416, found: 257.1408.

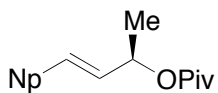

**(*R,E*)-4-(Naphthalen-2-yl)but-3-en-2-yl pivalate (1f).** Prepared according to the General Procedure on a 2.36 mmol scale to give **1f** (515 mg, 77%) as a white solid (mp 103–105 °C). The enantiomeric excess was determined to be 96% by chiral HPLC analysis (CHIRALPAK IA, 1.0 mL/min, 1.0% *i*-PrOH/hexane,  $\lambda=254$  nm);  $t_{\text{R}}(\text{major})=6.12$  min,  $t_{\text{R}}(\text{minor})=6.92$  min.  $[\alpha]_{\text{D}}^{24} = +141.9^\circ$  (c 0.82,  $\text{CHCl}_3$ ):  $^1\text{H}$  NMR (400 MHz,  $\text{CDCl}_3$ )  $\delta$  7.84 – 7.71 (m, 4H), 7.59 (dd,  $J = 8.6, 1.8$  Hz, 1H), 7.51 – 7.40 (m, 2H), 6.75 (d,  $J = 15.7$  Hz, 1H), 6.32 (dd,  $J = 16.0, 6.4$  Hz, 1H), 5.60 – 5.52 (m, 1H), 1.43 (d,  $J = 6.5$  Hz, 3H), 1.24 (s, 9H);  $^{13}\text{C}$  NMR (101 MHz,  $\text{CDCl}_3$ )  $\delta$  178.0, 134.1, 133.7, 133.2, 131.2, 129.6, 128.3, 128.1, 127.8, 126.8, 126.4, 126.1, 123.7, 70.7, 39.0, 27.3, 20.5; FTIR (NaCl/thin film) 2974, 1718, 1653, 1368, 1278, 1164, 1035, 972, 743  $\text{cm}^{-1}$ ; HRMS (EI+)  $[\text{M}]^+$  calculated for  $\text{C}_{19}\text{H}_{22}\text{O}_2$ : 282.1620, found: 282.1634.

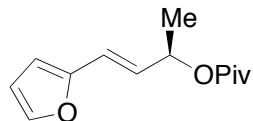

**(*R,E*)-4-(Furan-2-yl)but-3-en-2-yl pivalate (1g).** Prepared

according to the General Procedure on a 1.66 mmol scale to give **1g** (320 mg, 74%) as a colorless oil. The enantiomeric excess was determined to be 97% by chiral HPLC analysis (CHIRALPAK IA, 0.6 mL/min, 0.1% *i*-PrOH/hexane,  $\lambda=254$  nm);  $t_R(\text{major})=8.98$  min,  $t_R(\text{minor})=9.95$  min.  $[\alpha]_D^{24} = +124.1^\circ$  (c 1.25,  $\text{CHCl}_3$ ):  $^1\text{H NMR}$  (400 MHz,  $\text{CDCl}_3$ )  $\delta$  7.37 – 7.32 (m, 1H), 6.44 – 6.34 (m, 2H), 6.25 (d,  $J = 3.3$  Hz, 1H), 6.12 (dd,  $J = 15.9, 6.4$  Hz, 1H), 5.50 – 5.42 (m, 1H), 1.36 (d,  $J = 6.4$  Hz, 3H), 1.21 (s, 9H);  $^{13}\text{C NMR}$  (151 MHz,  $\text{CDCl}_3$ )  $\delta$  177.9, 152.3, 142.3, 127.9, 119.5, 111.5, 108.7, 70.3, 39.0, 27.3, 20.4; FTIR (NaCl/thin film) 2976, 2933, 2872, 1727, 1480, 1280, 1161, 1040, 959, 734  $\text{cm}^{-1}$ ; HRMS (EI+)  $[M]^+$  calculated for  $\text{C}_{13}\text{H}_{18}\text{O}_3$ : 222.1256, found: 222.1262.

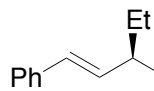

**(*R,E*)-1-Phenylpent-1-en-3-yl pivalate (1h).** Prepared according to the General Procedure on a 1.50 mmol scale to give **1h** (295 mg, 70%) as a pale yellow oil. The enantiomeric excess was determined to be 90% by chiral HPLC analysis (CHIRALCEL OD-H, 0.8 mL/min, 1.0% *i*-PrOH/hexane,  $\lambda=254$  nm);  $t_R(\text{major})=7.37$  min,  $t_R(\text{minor})=5.84$  min.  $[\alpha]_D^{24} = +87.1^\circ$  (c 2.41,  $\text{CHCl}_3$ ):  $^1\text{H NMR}$  (600 MHz,  $\text{CDCl}_3$ )  $\delta$  7.40 – 7.35 (m, 2H), 7.31 (t,  $J = 7.6$  Hz, 2H), 7.27 – 7.21 (m, 1H), 6.59 (d,  $J = 15.9$  Hz, 1H), 6.13 (dd,  $J = 16.0, 6.9$  Hz, 1H), 5.37 – 5.30 (m, 1H), 1.78 – 1.69 (m, 2H), 1.23 (s, 9H), 0.95 (t,  $J = 7.4$  Hz, 3H);  $^{13}\text{C NMR}$  (151 MHz,  $\text{CDCl}_3$ )  $\delta$  178.0, 136.7, 132.1, 128.7, 128.0, 127.9, 126.7, 75.5, 39.10, 27.9, 27.4, 9.7. The spectral data for this compound matches that reported in the literature.<sup>15</sup>

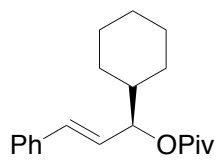

**(*R,E*)-1-Cyclohexyl-3-phenylallyl pivalate (1i).** Prepared according to the General Procedure on a 1.50 mmol scale to give **1i** (295 mg, 70%) as a white solid

<sup>15</sup> Phipps, R. J.; McMurray, L.; Ritter, S.; Duong, H. A.; Gaunt, M. J. *J. Am. Chem. Soc.* **2012**, 134, 10773.

(mp 69–71 °C). The enantiomeric excess was determined to be 87% by chiral HPLC analysis (CHIRALCEL OD-H, 0.8 mL/min, 1.0% *i*-PrOH/hexane,  $\lambda=254$  nm);  $t_R(\text{major})=6.89$  min,  $t_R(\text{minor})=5.32$  min.  $[\alpha]_D^{24} = +29.2^\circ$  (c 0.82, CHCl<sub>3</sub>): <sup>1</sup>H NMR (400 MHz, CDCl<sub>3</sub>)  $\delta$  7.41 – 7.19 (m, 5H), 6.55 (d,  $J = 15.9$  Hz, 1H), 6.12 (dd,  $J = 15.9, 7.4$  Hz, 1H), 5.23 – 5.14 (m, 1H), 1.85 – 1.59 (m, 6H), 1.22 (s, 10H), 1.22 – 0.99 (m, 4H); <sup>13</sup>C NMR (101 MHz, CDCl<sub>3</sub>)  $\delta$  177.9, 136.8, 132.8, 128.7, 127.9, 127.0, 126.7, 78.4, 42.3, 39.2, 29.07, 28.6, 27.4, 26.6, 26.2, 26.1; FTIR (NaCl/thin film) 3026, 2929, 2854, 1728, 1479, 1280, 1158, 966, 748 cm<sup>-1</sup>; HRMS (EI+)  $[M]^+$  calculated for C<sub>20</sub>H<sub>28</sub>O<sub>2</sub>: 300.2089, found: 300.2066.

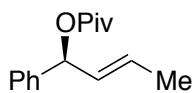

**(*S,E*)-1-Phenylbut-2-en-1-yl pivalate (27)**. Prepared according to the General Procedure on a 0.6 mmol scale to give **27** (103.5 mg, 78%) as a colorless oil. The enantiomeric excess was assumed to be unchanged from allylic alcohol **S-27** (96% ee).  $[\alpha]_D^{24} = -10.2^\circ$  (c 2.15, CHCl<sub>3</sub>): <sup>1</sup>H NMR (600 MHz, CDCl<sub>3</sub>)  $\delta$  7.39 – 7.26 (m, 5H), 6.17 (d,  $J = 6.9$  Hz, 1H), 5.80 – 5.70 (m, 1H), 5.67 – 5.60 (m, 1H), 1.71 (d,  $J = 6.6$  Hz, 3H), 1.22 (s, 9H); <sup>13</sup>C NMR (151 MHz, CDCl<sub>3</sub>)  $\delta$  177.5, 140.3, 130.0, 129.2, 128.6, 127.8, 126.7, 76.0, 39.0, 27.3, 17.9; FTIR (NaCl/thin film) 2972, 1732, 1480, 1455, 1278, 1149, 963 cm<sup>-1</sup>; HRMS (EI+)  $[M]^+$  calculated for C<sub>21</sub>H<sub>24</sub>O<sub>3</sub>: 232.1463, found: 232.1470.

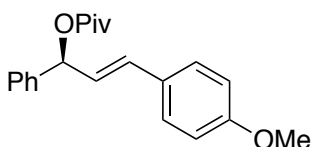

**(*S,E*)-3-(4-Methoxyphenyl)-1-phenylallyl pivalate (28)**. Compound **28** was prepared via the General Procedure a 1.0 mmol scale. The crude material was purified by silica gel chromatography (5–7.5% Et<sub>2</sub>O/hexanes, silica gel pre-saturated with Et<sub>3</sub>N) to give **28** (167 mg, 54%) as a colorless oil. The enantiomeric excess was determined to be 66% by chiral HPLC analysis (CHIRALPAK IA, 1.0 mL/min, 5% *i*-PrOH/hexane,  $\lambda=210$  nm);  $t_R(\text{major})=7.21$  min,  $t_R(\text{minor})=6.26$  min.  $[\alpha]_D^{24} = +4.1^\circ$  (c 4.83, CHCl<sub>3</sub>): <sup>1</sup>H NMR (400 MHz, CDCl<sub>3</sub>)  $\delta$  7.40 – 7.29 (m, 7H), 6.84 (d,  $J = 8.8$  Hz, 2H), 6.46 (d,  $J = 15.6$  Hz, 1H), 6.37 (d,  $J = 7.2$  Hz, 1H), 6.17 (dd,  $J = 15.6, 6.8$  Hz, 1H), 3.80 (s, 3H), 1.24 (s, 9H); <sup>13</sup>C NMR (101 MHz, CDCl<sub>3</sub>)  $\delta$  177.4, 159.5, 139.9, 131.9,



129.0, 128.6, 128.0, 127.9, 126.7, 125.6, 113.9, 76.0, 55.3, 38.9, 27.1; FTIR (NaCl/thin film) 2971, 2933, 1732, 1608, 1512, 1277, 1252, 1149, 699  $\text{cm}^{-1}$ ; HRMS (LIFDI)  $[\text{M}]^+$  calculated for  $\text{C}_{21}\text{H}_{24}\text{O}_3$ : 324.1720, found: 324.1725.

## Preparation of Enantioenriched Allylic Alcohols

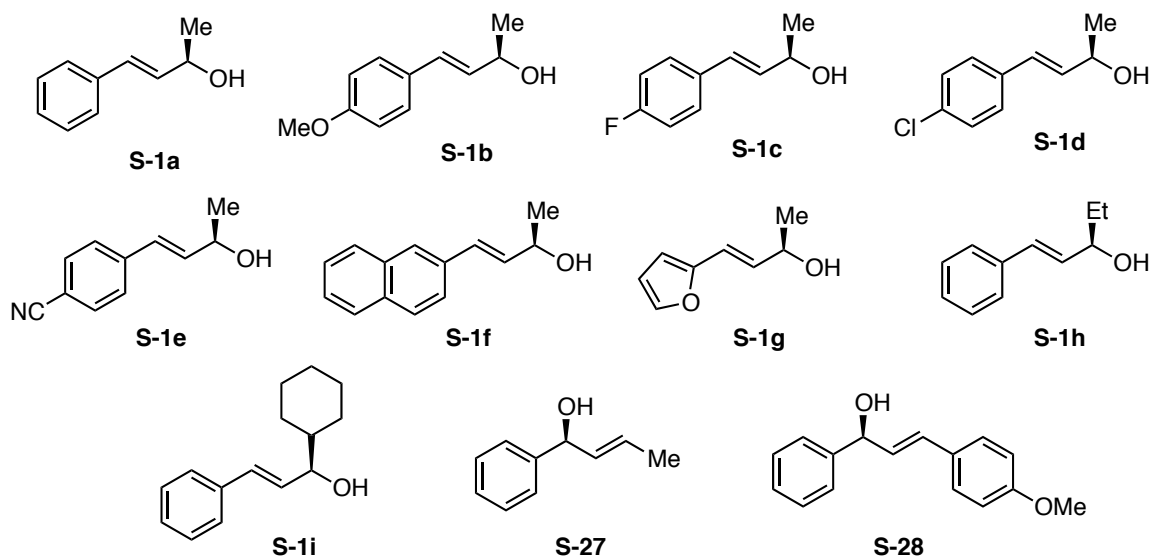

Enantioenriched allylic alcohols (**S-1a** to **S-1i**) were prepared via CBS reduction of the corresponding ketones according to the procedure reported in the literature.<sup>16</sup> These reductions are known to give the stereochemistry shown. A detailed example of the synthesis of **S-1e** obtained by this method is given below. **S-27** and **S-28** were prepared according to a reported procedure.<sup>17</sup>

<sup>16</sup> (a) Corey, E. J.; Bakshi, R. K. *Tetrahedron Lett.* **1990**, 31, 611. (b) Corey, E. J.; Helal, C. J. *Tetrahedron Lett.* **1995**, 36, 9153.

<sup>17</sup> Hidaka, I.; Michiko, S.; Kei, T.; Masatoshi, K.; Kentaro, Y. *Chem. Eur. J.* **2009**, 15, 4663.

## General Procedure for the Preparation of Allylic Alcohols S-1a to S-1i:

### Preparation of (*R*)-4-(4-Cyanophenyl)-3-buten-2-ol (S-1e)

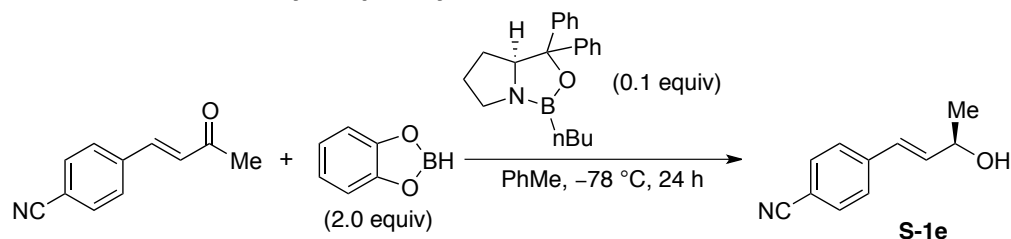

In an oven-dried, 100-mL round-bottomed flask, (*E*)-4-(4-cyanophenyl)-3-buten-2-one (1.08 g, 5.84 mmol, 1.0 equiv) was dissolved in 10 mL PhMe. Under N<sub>2</sub>, (*S*)-(-)-2-butyl-CBS-oxazaborolidine (0.58 mL, 0.58 mmol, 1.0 M in PhMe, 0.1 equiv) was added. After stirring at room temperature for 15 min, the mixture was cooled to -78 °C, and catecholborane (1.25 mL, 11.68 mmol, 2.0 equiv) was added slowly. The mixture was stirred at -78 °C for additional 24 h. Sat. NaHCO<sub>3</sub> (10 mL) was added, and the crude product was extracted with EtOAc (3 x 20 mL). The combined organic layers were washed with aq. NaOH (1.5 M) until the color of the solution was light yellow, indicating the complete removal of residual catecholborane. The organic layers were then treated with sat. NaCl, dried (MgSO<sub>4</sub>), filtered and concentrated. The resulting residue was purified by silica gel chromatography (50% Et<sub>2</sub>O/hexanes) to give compound **S-1e** (920 mg, 92%) as a yellow oil. The enantiomeric excess was determined to be 80% by chiral HPLC analysis (CHIRALPAK IA, 1.0 mL/min, 6.0% *i*-PrOH/hexane, λ = 254 nm); *t*<sub>R</sub>(major)=21.77 min, *t*<sub>R</sub>(minor)=19.56 min. [α]<sub>D</sub><sup>24</sup> = -9.2° (c 2.39, CHCl<sub>3</sub>); <sup>1</sup>H NMR (600 MHz, CDCl<sub>3</sub>) δ 7.60 (d, J = 8.2 Hz, 2H), 7.45 (d, J = 8.2 Hz, 2H), 6.60 (d, J = 16.0 Hz, 1H), 6.39 (dd, J = 15.9, 5.8 Hz, 1H), 4.57 – 4.50 (m, 1H), 1.65 (brs, 1H), 1.39 (d, J = 6.4 Hz, 3H); <sup>13</sup>C NMR (151 MHz, CDCl<sub>3</sub>) δ 141.5, 137.6, 132.57, 127.6, 127.1, 119.1, 111.0, 68.6, 23.6; FTIR (NaCl/thin film) 3421(brs), 2973, 2226, 1604, 1504, 1142, 971 cm<sup>-1</sup>; HRMS (EI) [M]<sup>+</sup> calculated for C<sub>11</sub>H<sub>11</sub>NO: 173.0841, found: 173.0867.

## Preparation of Allylic Alcohols **S-27** and **S-28**

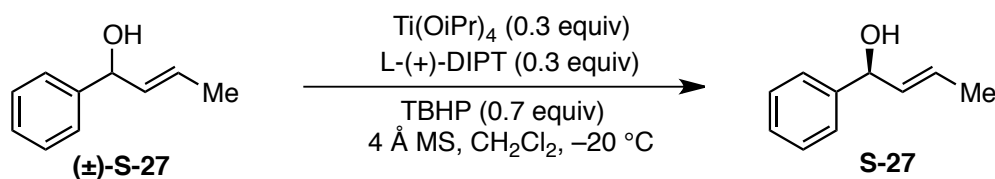

In an oven-dried, 100-mL round-bottomed flask, L-(+)-DIPT (0.74 mL, 3.54 mmol, 0.3 equiv) was added to a suspension of (*E*)-1-phenyl-2-buten-1-ol (1.76g, 11.8 mmol, 1.0 equiv), 4 Å MS (0.85 g, crushed before use), and CH<sub>2</sub>Cl<sub>2</sub> (47 mL). The suspension was then cooled to -20 °C, and Ti(O<sup>i</sup>Pr)<sub>4</sub> (1.06 mL, 3.54 mmol, 0.3 equiv) and TBHP (1.5 mL, 8.25 mmol, 5.5 M in decane, 0.7 equiv) were added. The mixture was stirred for 3 h at -20 °C. FeSO<sub>4</sub>·7H<sub>2</sub>O (6.5 g) and H<sub>2</sub>O (40 mL) were then added, followed by tartaric acid (2.2 g), H<sub>2</sub>O (20 mL), and aq. HCl (1.0 M, 30 mL) to dissolve the precipitate. The layers were separated. The organic layer was then washed with sat. NaCl, dried (Na<sub>2</sub>SO<sub>4</sub>), filtered, and concentrated. The resulting residue was purified by silica gel chromatography (15% Et<sub>2</sub>O/hexanes) to give compound **S-27** (240 mg, 27%) as colorless oil. The enantiomeric excess was determined to be 96% by chiral GC analysis (Agilent 19091C-133/HP-225, 50% cyanopropyl, 50% phenylmethyl polysiloxane capillary column, initial temperature of 40 °C, ramp 1.0 °C/min to 180 °C, hold for 10 min); *t*<sub>R</sub>(major)=105.67 min, *t*<sub>R</sub>(minor)=106.02 min. [α]<sub>D</sub><sup>24</sup> = +16.2° (c 3.29, CHCl<sub>3</sub>). The absolute configuration was determined to be *S* by comparison of the optical rotation to that reported in the literature.<sup>18</sup>

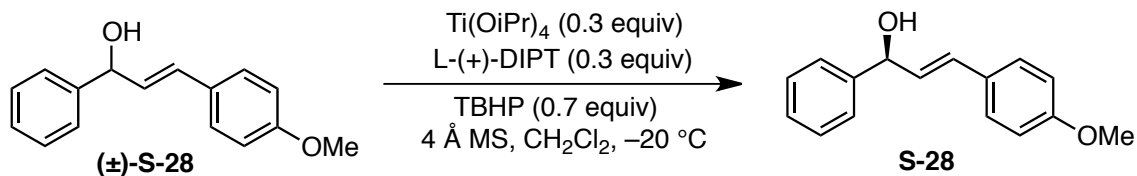

**S-28** was prepared on a 8.0-mmol scale from (±)-**S-28** according to the procedure described for **S-27** above. **S-28** (662 mg, 70%) was obtained as a sticky yellow oil from the crude residue by silica gel chromatography (33% Et<sub>2</sub>O/hexanes). The enantiomeric

<sup>18</sup> Hayashi, T.; Yamamoto, A.; Hagishita, T. *J. Org. Chem.* **1986**, 51, 723.

excess was determined to be 67% by chiral HPLC analysis (CHIRALPAK IA, 1.0 mL/min, 8.0% *i*-PrOH/hexane,  $\lambda = 254$  nm);  $t_R(\text{major}) = 20.38$  min,  $t_R(\text{minor}) = 17.82$  min.  $[\text{m}_D^{24} = -5.1^\circ$  (c 4.26,  $\text{CHCl}_3$ ). The spectral data for this compound matches that reported in the literature.<sup>19</sup>

## Preparation of (*S*)-Ketoprofen

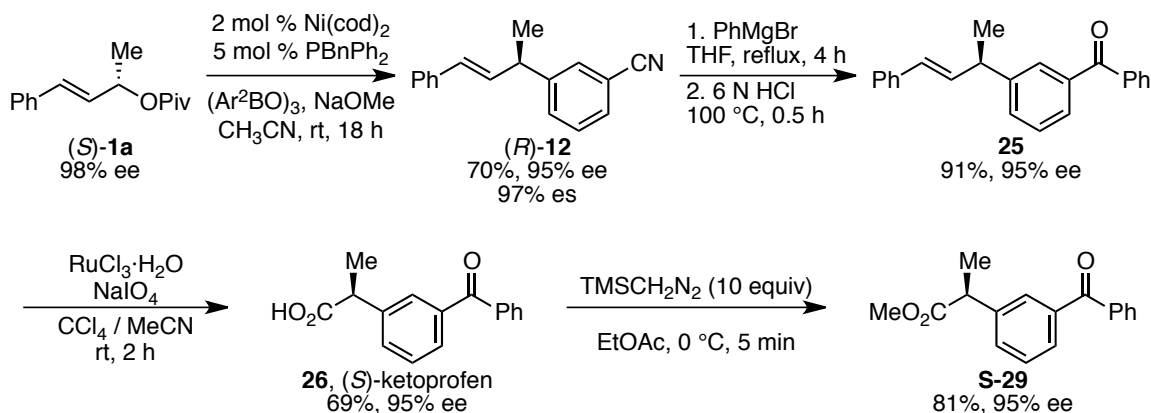

Compound (*R*)-**12** was prepared in 95% ee via the General Procedure using pivalate (*S*)-**1a** (prepared in 98% ee), as described above.

The conversion of (*R*)-**12** to **25** followed a procedure adapted from the literature.<sup>20</sup> In a 25-mL, three-neck round-bottomed flask equipped with a reflux condenser, **12** (180 mg, 0.77 mmol, 95% ee, 1.0 equiv) and THF (1.6 mL) were combined. PhMgBr (1.0 M in THF, 3.9 mL, 3.9 mmol, 5.0 equiv) was added slowly at room temperature. Upon completion of addition, the mixture was refluxed for 4 h. After cooling to room temperature, HCl (6 N, 2 mL) was added. The mixture was heated at 100 °C for 30 min. After cooling to room temperature, H<sub>2</sub>O (20 mL) was added. The crude product was extracted with Et<sub>2</sub>O (3 x 10 mL), dried (MgSO<sub>4</sub>), filtered, and concentrated. The resulting material was purified by silica gel chromatography (5% Et<sub>2</sub>O/hexanes) to give **25** (219 mg, 91%) as a light yellow oil. The enantiomeric excess was determined to be 95% by chiral HPLC analysis (CHIRALPAK IA, 1.0 mL/min, 1.0% *i*-PrOH/hexane,  $\lambda = 220$  nm);  $t_R(\text{major}) = 13.43$  min,  $t_R(\text{minor}) = 14.41$  min.  $[\alpha]_D^{24} = +35.2^\circ$  (c 1.7,  $\text{CHCl}_3$ ):

<sup>19</sup> Xu, W.; Zhou, Y.; Wang, R.; Wu, G.; Chen, P. *Org. Biomol. Chem.* **2012**, 10, 367.

<sup>20</sup> Riva, E.; Gagliardi, M.; Martinelli, M.; Passarella, D.; Vigo, D.; Rencurosi, A. *Tetrahedron* **2010**, 66, 3242.

$^1\text{H}$  NMR (600 MHz,  $\text{CDCl}_3$ )  $\delta$  7.84 – 7.79 (m, 2H), 7.75 (s, 1H), 7.64 – 7.61 (m, 1H), 7.60 – 7.56 (m, 1H), 7.53 – 7.45 (m, 3H), 7.42 (t,  $J = 7.6$  Hz, 1H), 7.38 – 7.34 (m, 2H), 7.32 – 7.27 (m, 2H), 7.23 – 7.18 (m, 1H), 6.48 – 6.34 (m, 2H), 3.76 – 3.69 (m, 1H), 1.50 (d,  $J = 7.0$  Hz, 3H);  $^{13}\text{C}$  NMR (151 MHz,  $\text{CDCl}_3$ )  $\delta$  197.0, 146.2, 138.0, 137.8, 137.5, 134.7, 132.5, 131.6, 130.2, 129.2, 129.0, 128.7, 128.5, 128.39, 128.38, 127.4, 126.3, 42.7, 21.3; FTIR (NaCl/thin film) 3024, 2965, 1658, 1597, 1493, 1447, 1317, 1178, 966  $\text{cm}^{-1}$ ; HRMS (EI)  $[\text{M}]^+$  calculated for  $\text{C}_{23}\text{H}_{20}\text{O}$ : 312.1514, found: 312.1534.

The conversion of **25** to **26** followed a procedure adapted from the literature.<sup>21</sup> A suspension of  $\text{RuCl}_3 \cdot \text{H}_2\text{O}$  (7.3 mg, 0.035 mmol, 0.05 equiv) in  $\text{H}_2\text{O}$  (7.3 mL) was added to a solution of **25** (219 mg, 0.7 mmol, 1.0 equiv),  $\text{NaIO}_4$  (749 mg, 3.5 mmol, 5.0 equiv), and  $\text{CCl}_4/\text{MeCN}$  (v/v = 1/1, 9.4 mL) at 0 °C. The mixture was then stirred at room temperature for 2 h.  $\text{Et}_2\text{O}$  (30 mL) was added, and the crude product was then extracted with sat.  $\text{NaHCO}_3$  (5 x 15 mL). The combined aqueous layers were then cooled to 0 °C, and  $\text{HCl}$  (6 N) was carefully added until the  $\text{pH} \leq 1$ . The crude product was then extracted from aqueous layer with  $\text{CH}_2\text{Cl}_2$  (5 x 15 mL). The combined organic layers were dried ( $\text{Na}_2\text{SO}_4$ ), filtered, and concentrated. The crude material was purified by silica gel chromatography (0–3%  $\text{MeOH}/\text{CH}_2\text{Cl}_2$ ) to give (*S*)-ketoprofen (**26**) as an off-white solid (124 mg, 69%). The spectral data of **26** matches that reported in the literature.<sup>22</sup>

The enantiomeric excess of **26** was determined to be 95% based on the corresponding methyl ester **S-29**, which was prepared via a reported procedure on a 0.17 mmol scale.<sup>22a</sup> The spectral data of **S-29** matches that reported in the literature.<sup>22</sup> The enantiomeric excess of **S-29** was determined to be 95% by chiral HPLC analysis (CHIRALPAK IB, 0.8 mL/min, 0.5%  $\text{EtOH}/\text{hexane}$ ,  $\lambda = 254$  nm);  $t_{\text{R}}(\text{major}) = 39.65$  min,  $t_{\text{R}}(\text{minor}) = 37.39$  min.  $[\alpha]_{\text{D}}^{24} = +43.5^\circ$  (c 0.80,  $\text{CHCl}_3$ ). The absolute configuration of **S-29** was determined to be *S* by comparing the optical rotation with reported data.<sup>23</sup>

---

<sup>21</sup> Norinder, J.; Bogár, K.; Kanupp, L.; Bäckvall, J.-E. *Org. Lett.* **2007**, 9, 5095.

<sup>22</sup> (a) Allen, A. E.; MacMillan, D. W. C. *J. Am. Chem. Soc.*, **2011**, 133, 4260; (b) Shiina, I.; Nakata, K.; Onda, Y.-S. *Eur. J. Org. Chem.* **2008**, 5887; (c) Fadel, A. *Synlett* **1992**, 48.

<sup>23</sup> Neumann, H.; Brennführer, A.; Beller, M. *Adv. Synth. Catal.* **2008**, 350, 2437.

compound 2

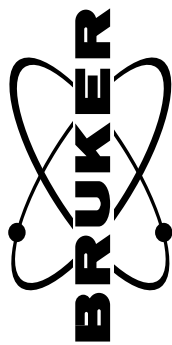

1.480  
1.492

3.649  
3.660  
3.671

6.409  
6.419  
6.424  
7.209  
7.229  
7.287  
7.299  
7.313  
7.322  
7.335  
7.365  
7.378

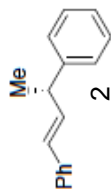

Current Data Parameters  
NAME QZ-4-296-1  
EXPNO 1  
PROCNO 1

F2 - Acquisition Parameters  
Date\_ 20131112  
Time\_ 18.45  
INSTRUM spect  
PROBHD 5 mm PABBO BB/  
PULPROG zg30  
TD 65536  
SOLVENT CDC13  
NS 8  
DS 2  
SWH 8403.361 Hz  
FIDRES 0.128225 Hz  
AQ 3.8994420 sec  
RG 101  
DW 59.500 usec  
DE 17.39 usec  
TE 298.0 K  
D1 1.00000000 sec  
TD0 1

==== CHANNEL f1 =====  
SFO1 600.3233018 MHz  
NUC1 1H  
P1 10.77 usec

F2 - Processing parameters  
SI 65536  
SF 600.3200139 MHz  
WDW EM  
SSB 0  
LB 0.30 Hz  
GB 0  
PC 1.00

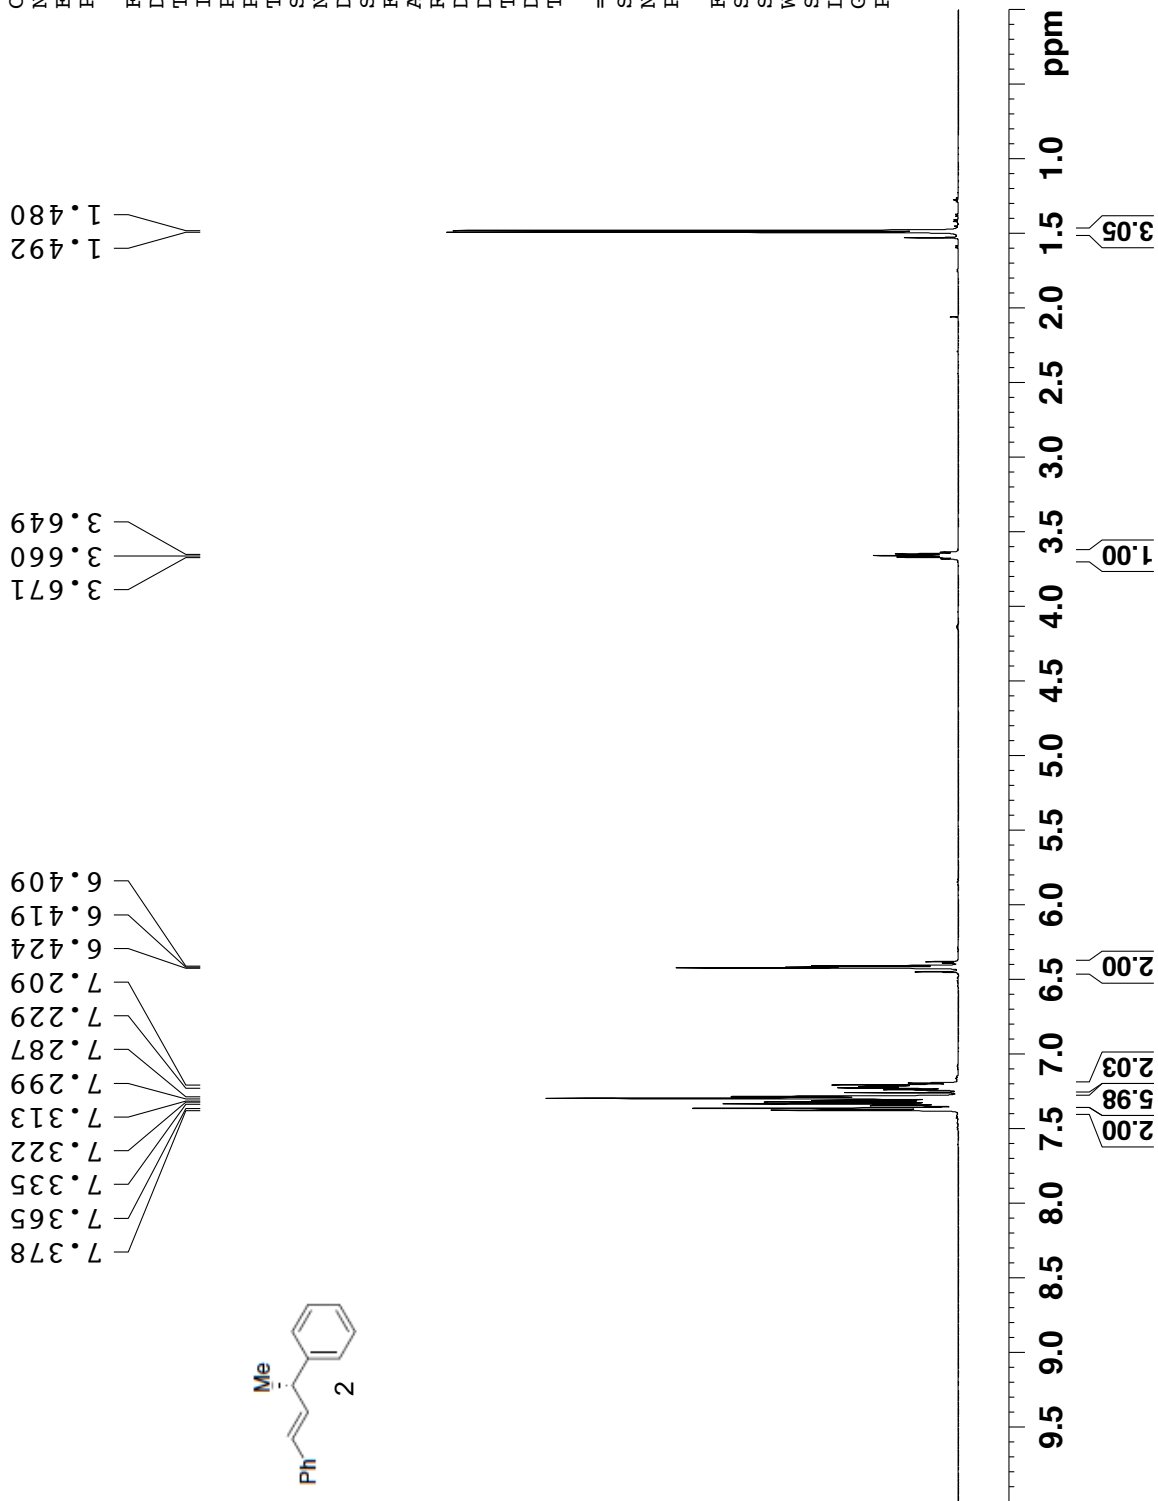

compound 2

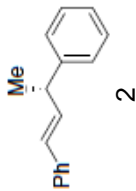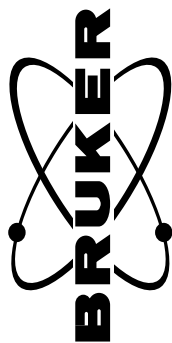

145.83  
137.65  
135.19  
128.48  
128.44  
128.39  
127.15  
126.99  
126.99  
126.11  
126.07

42.65  
20.93

Current Data Parameters  
NAME QZ-3-244rs1  
EXPNO 2  
PROCNO 1

F2 - Acquisition Parameters  
Date\_ 20130524  
Time 23.45  
INSTRUM spect  
PROBHD 5 mm CPQNP 1H/  
PULPROG zgpg30  
TD 65536  
SOLVENT Acetone  
NS 1024  
DS 4  
SWH 23980.814 Hz  
FIDRES 0.365918 Hz  
AQ 1.3664756 sec  
RG 512  
DW 20.850 usec  
DE 18.00 usec  
TE 298.2 K  
D1 2.00000000 sec  
D11 0.03000000 sec  
TD0 1

==== CHANNEL f1 =====  
NUC1 13C  
P1 9.25 usec  
PL1 0.55 dB  
PL1W 35.18820572 W  
SFO1 100.6228298 MHz

==== CHANNEL f2 =====  
CPDPRG2 waltz16  
NUC2 1H  
PCPD2 90.00 usec  
PL2 4.90 dB  
PL12 20.46 dB  
PL13 21.00 dB  
PL2W 3.30822015 W  
PL12W 0.09195905 W  
PL13W 0.08120718 W  
SFO2 400.1316005 MHz

F2 - Processing parameters  
SI 32768  
SF 100.6127690 MHz  
EM  
SSB 0  
LB 1.00 Hz  
GB 0  
PC 1.40

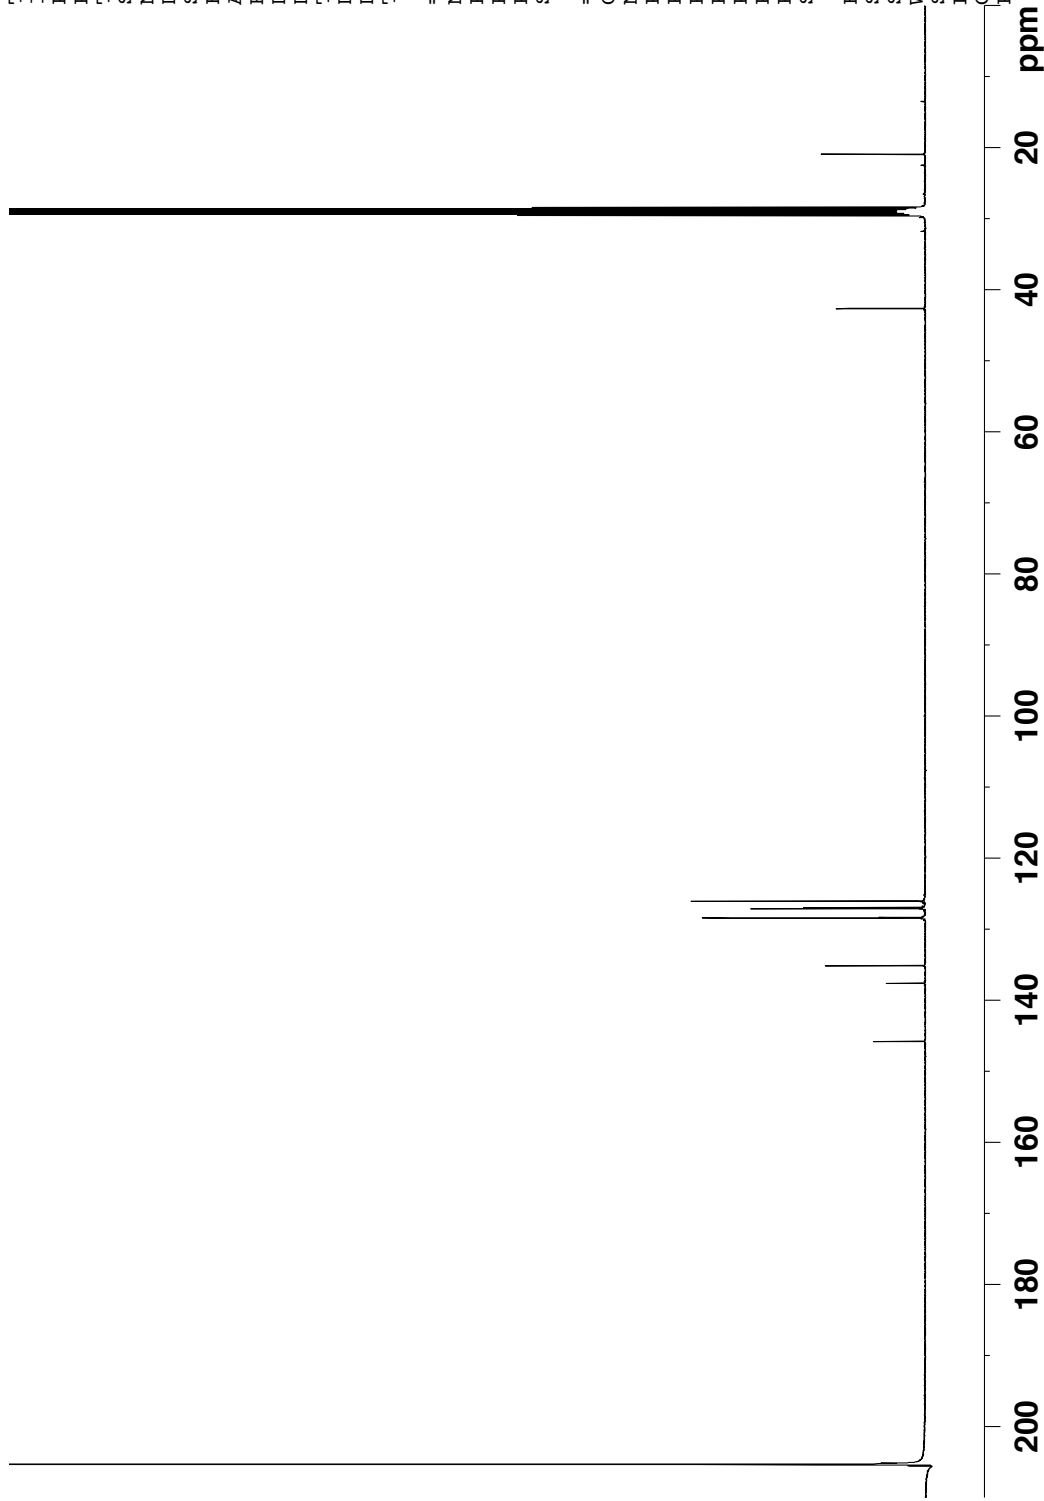



compound 3

7.384  
7.381  
7.363  
7.321  
7.316  
7.302  
7.283  
7.260  
7.226  
7.220  
7.215  
7.208  
7.203  
7.199  
7.191  
6.894  
6.889  
6.877  
6.872  
6.398  
6.386

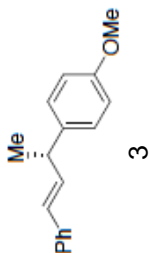

3.812  
3.632  
3.620  
3.615  
3.603

1.468  
1.450

Current Data Parameters  
NAME HH-4-250A  
EXPNO 1  
PROCNO 1

F2 - Acquisition Parameters  
Date\_ 20130429  
Time\_ 17.31  
INSTRUM spect  
PROBHD 5 mm CPQNP 1H/  
PULPROG zg30  
TD 65536  
SOLVENT CDCl3  
NS 16  
DS 2  
SWH 8278.146 Hz  
FIDRES 0.126314 Hz  
AQ 3.9584243 sec  
RG 10.1  
DW 60.400 usec  
DE 6.00 usec  
TE 298.2 K  
D1 1.00000000 sec  
TD0 1

==== CHANNEL f1 =====  
NUC1 1H  
P1 15.00 usec  
PL1 4.90 dB  
PL1W 3.30822015 W  
SFO1 400.1324710 MHz

F2 - Processing parameters  
SI 32768  
SF 400.1300093 MHz  
WDW EM  
SSB 0  
LB 0.30 Hz  
GB 0  
PC 1.00

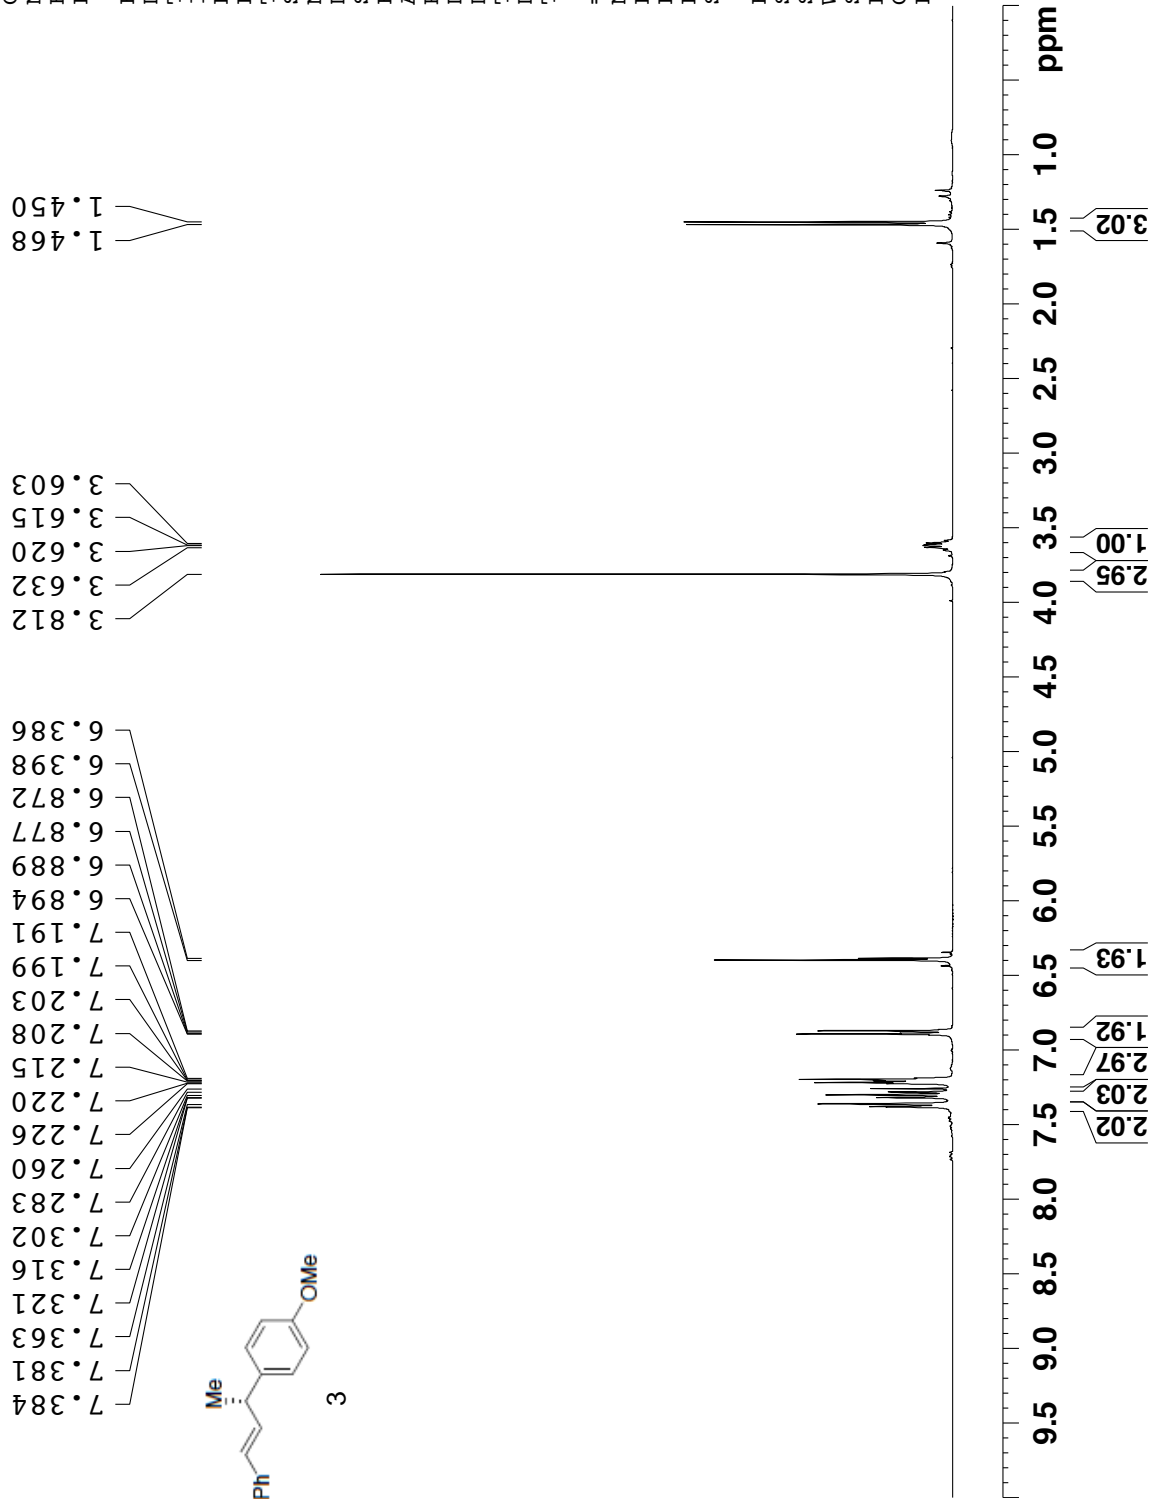





compound 3

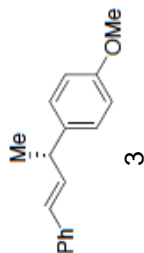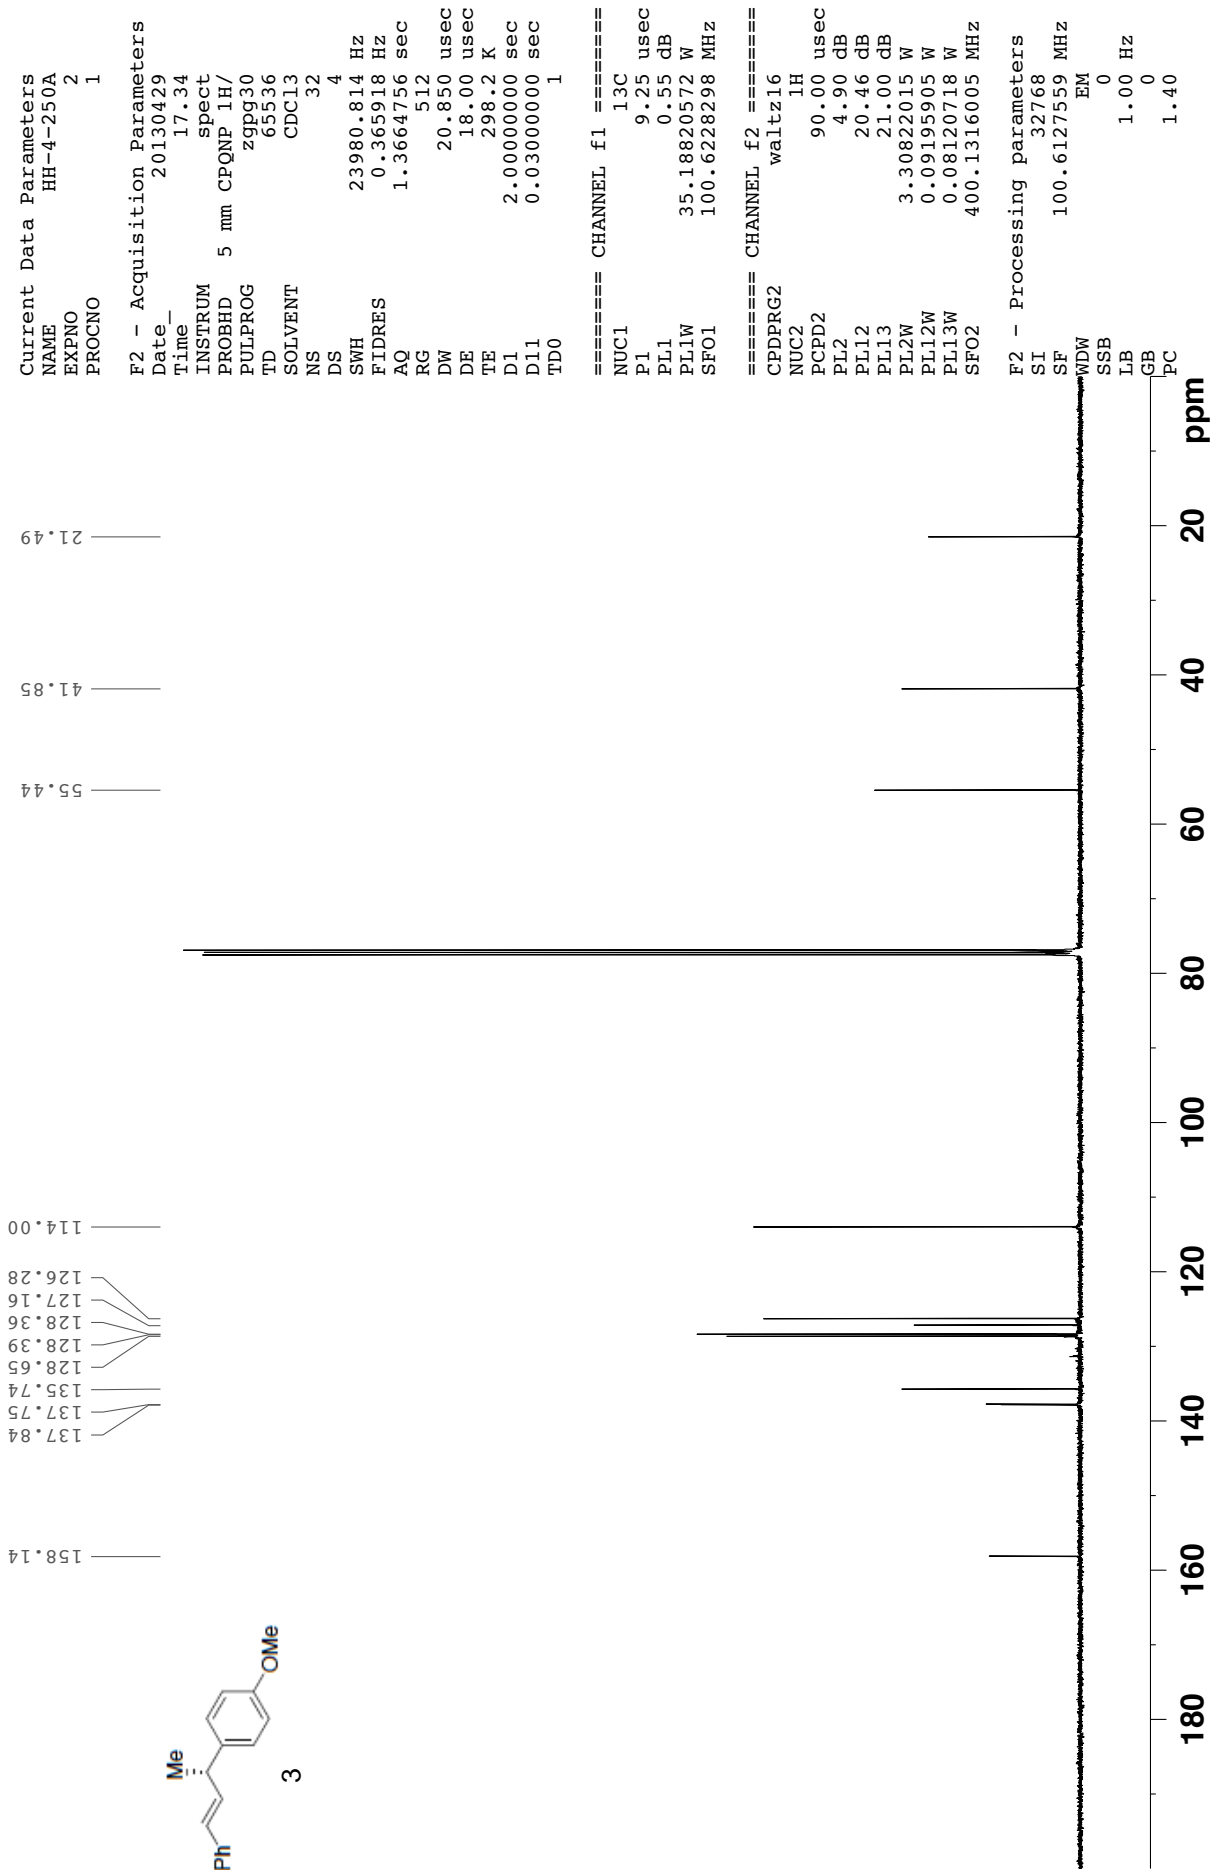

compound 4



Current Data Parameters  
NAME HH-4-247B-PURE  
EXPNO 1  
PROCNO 1

F2 - Acquisition Parameters  
Date\_ 20130629  
Time\_ 13.04  
INSTRUM spect  
PROBHD 5 mm PABBO BB/  
PULPROG zg30  
TD 65536  
SOLVENT Acetone  
NS 8  
DS 2  
SWH 8403.361 Hz  
FIDRES 0.128225 Hz  
AQ 3.8994420 sec  
RG 57  
DW 59.500 usec  
DE 17.39 usec  
TE 298.0 K  
D1 1.00000000 sec  
TD0 1

==== CHANNEL f1 =====  
SFO1 600.3233018 MHz  
NUC1 1H  
P1 10.77 usec

F2 - Processing parameters  
SI 65536  
SF 600.3200119 MHz  
WDW EM  
SSB 0  
LB 0.30 Hz  
GB 0  
PC 1.00

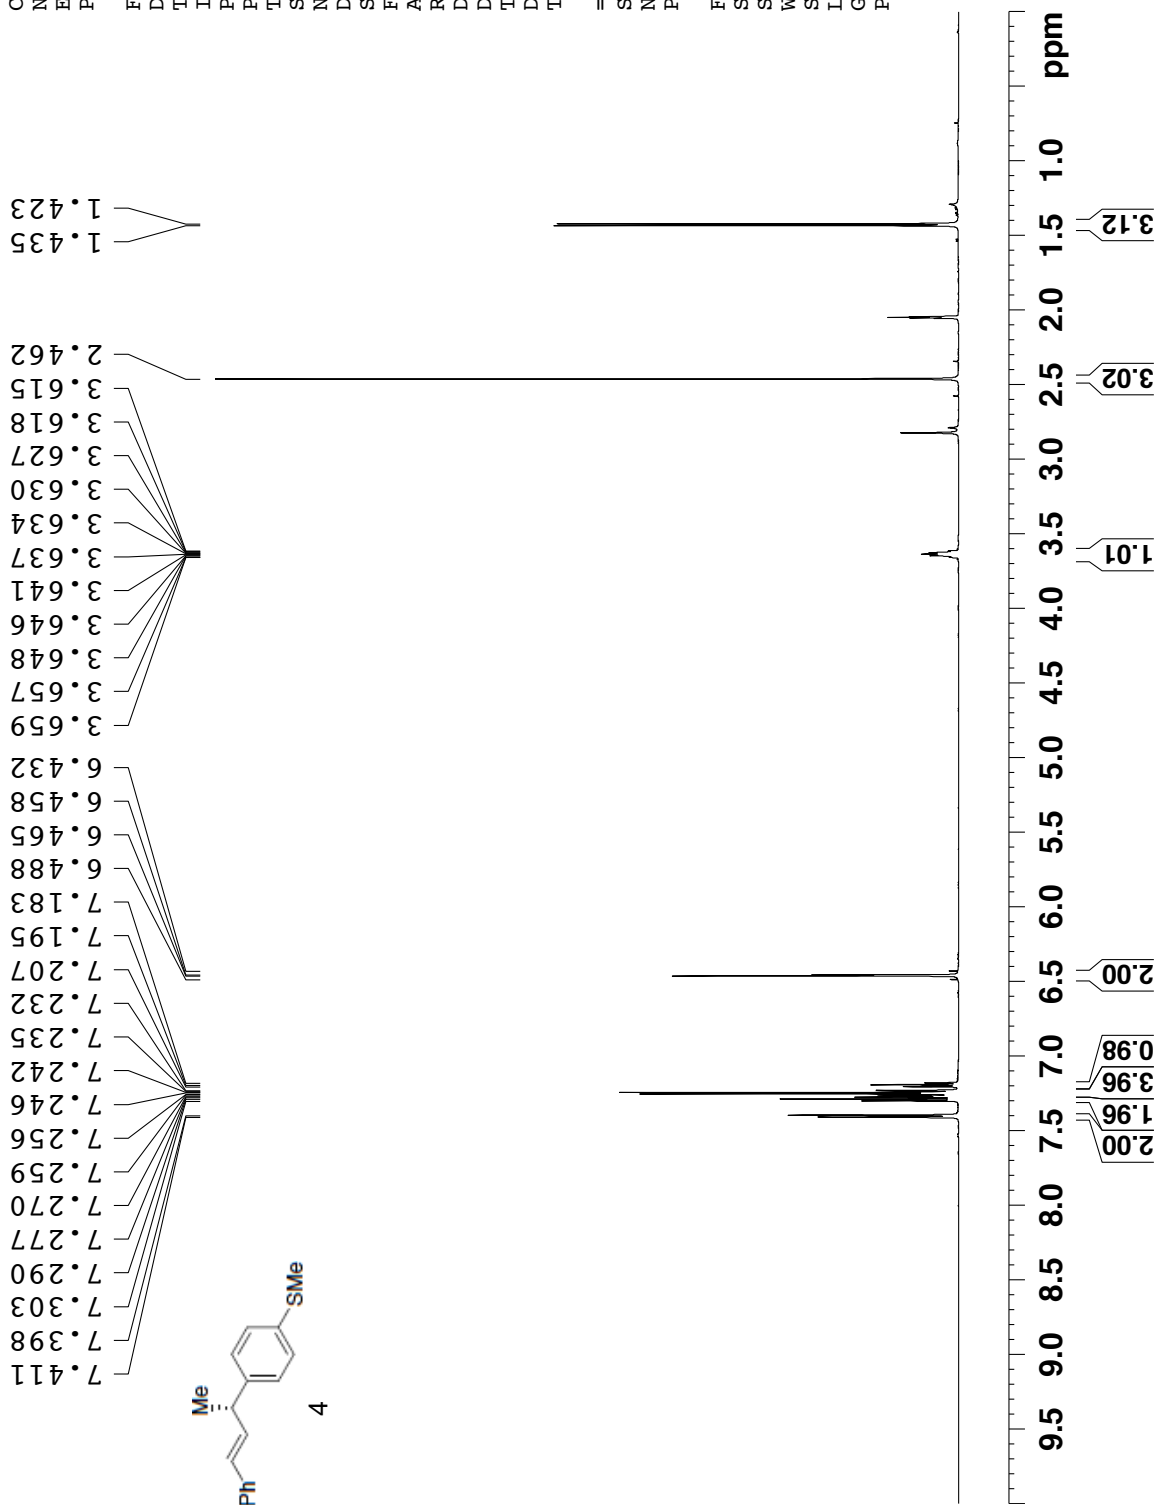



compound 5

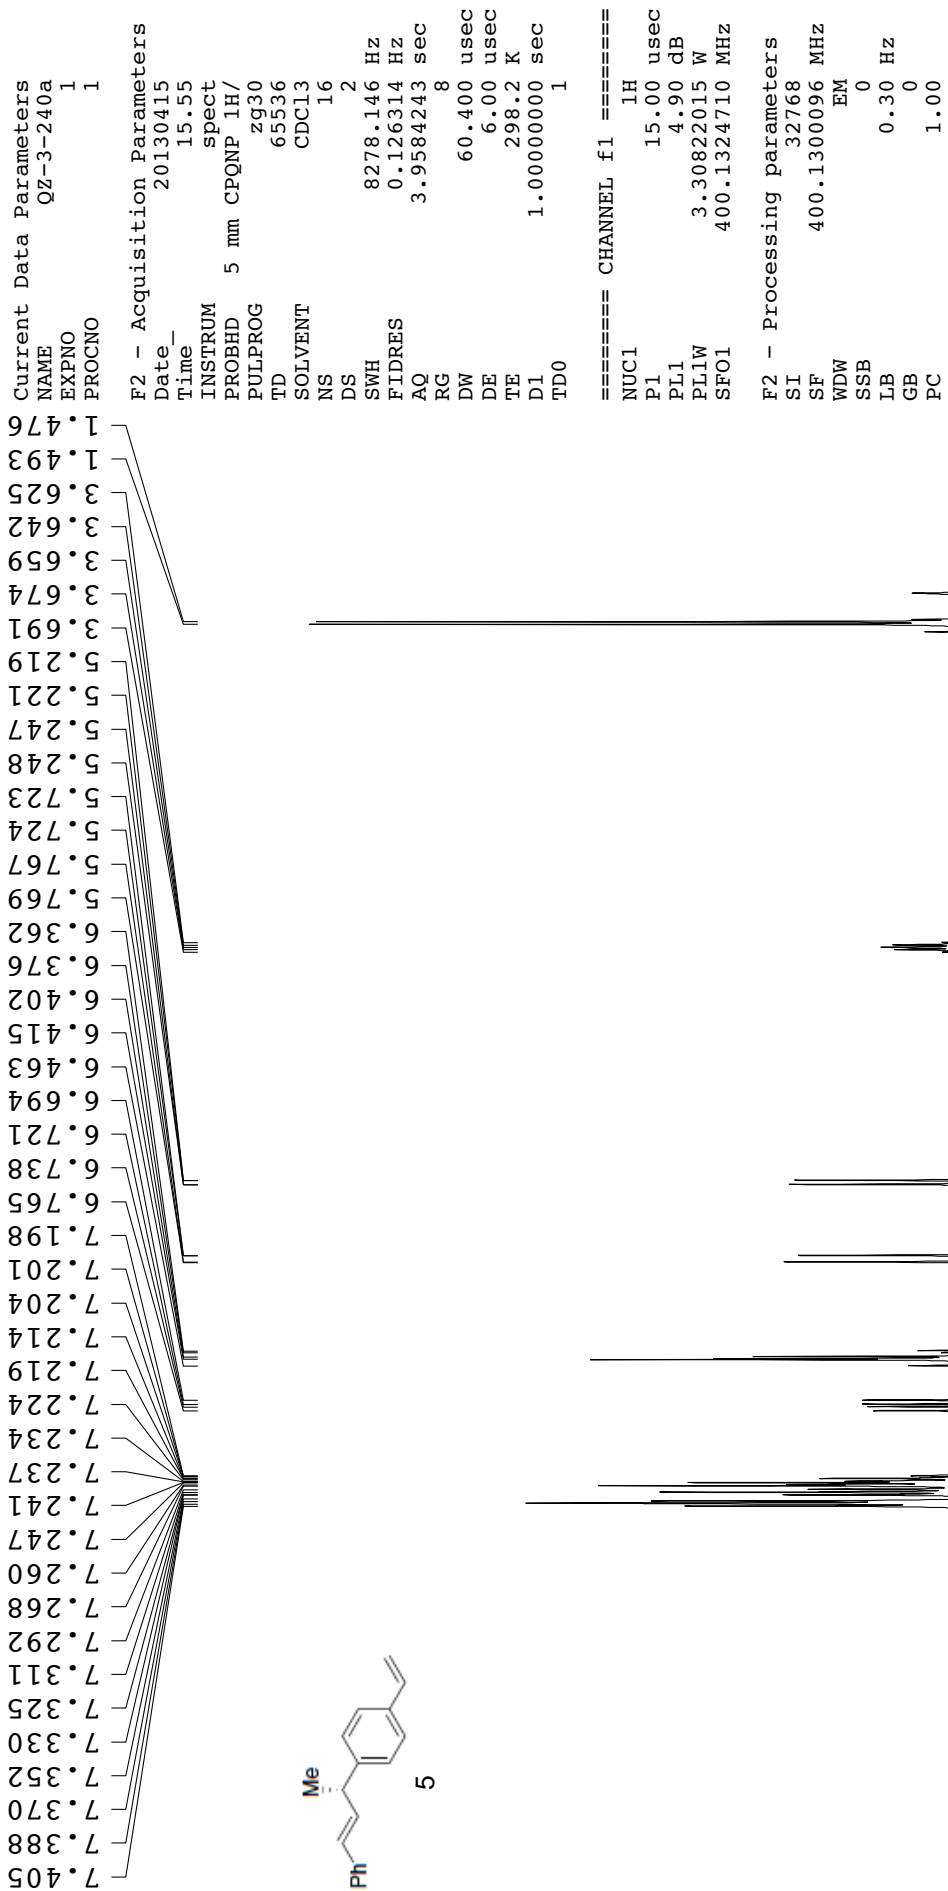

compound 5

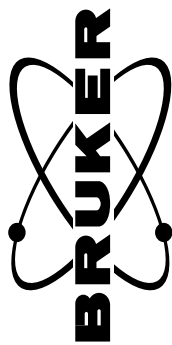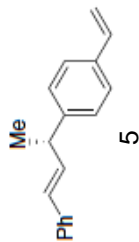

145.47  
137.66  
136.74  
135.82  
135.19  
128.74  
128.67  
127.66  
127.25  
126.53  
126.31  
113.44

42.46  
21.32

Current Data Parameters  
NAME QZ-3-240a  
EXPNO 2  
PROCNO 1

F2 - Acquisition Parameters  
Date\_ 20130415  
Time 22.07  
INSTRUM spect  
PROBHD 5 mm CPQNP 1H/  
PULPROG zgpg30  
TD 65536  
SOLVENT CDC13  
NS 1024  
DS 4  
SWH 23980.814 Hz  
FIDRES 0.365918 Hz  
AQ 1.3664756 sec  
RG 512  
DW 20.850 usec  
DE 18.00 usec  
TE 298.1 K  
D1 2.00000000 sec  
D11 0.03000000 sec  
TD0 1

=====  
CHANNEL f1  
NUC1 13C  
P1 9.25 usec  
PL1 0.55 dB  
PL1W 35.18820572 W  
SFO1 100.6228298 MHz

=====  
CHANNEL f2  
CPDPRG2 waltz16  
NUC2 1H  
PCPD2 90.00 usec  
PL2 4.90 dB  
PL12 20.46 dB  
PL13 21.00 dB  
PL2W 3.30822015 W  
PL12W 0.09195905 W  
PL13W 0.08120718 W  
SFO2 400.1316005 MHz

F2 - Processing parameters  
SI 32768  
SF 100.6127561 MHz  
EM  
WDW 0  
SSB 0  
LB 1.00 Hz  
GB 0  
PC 1.40

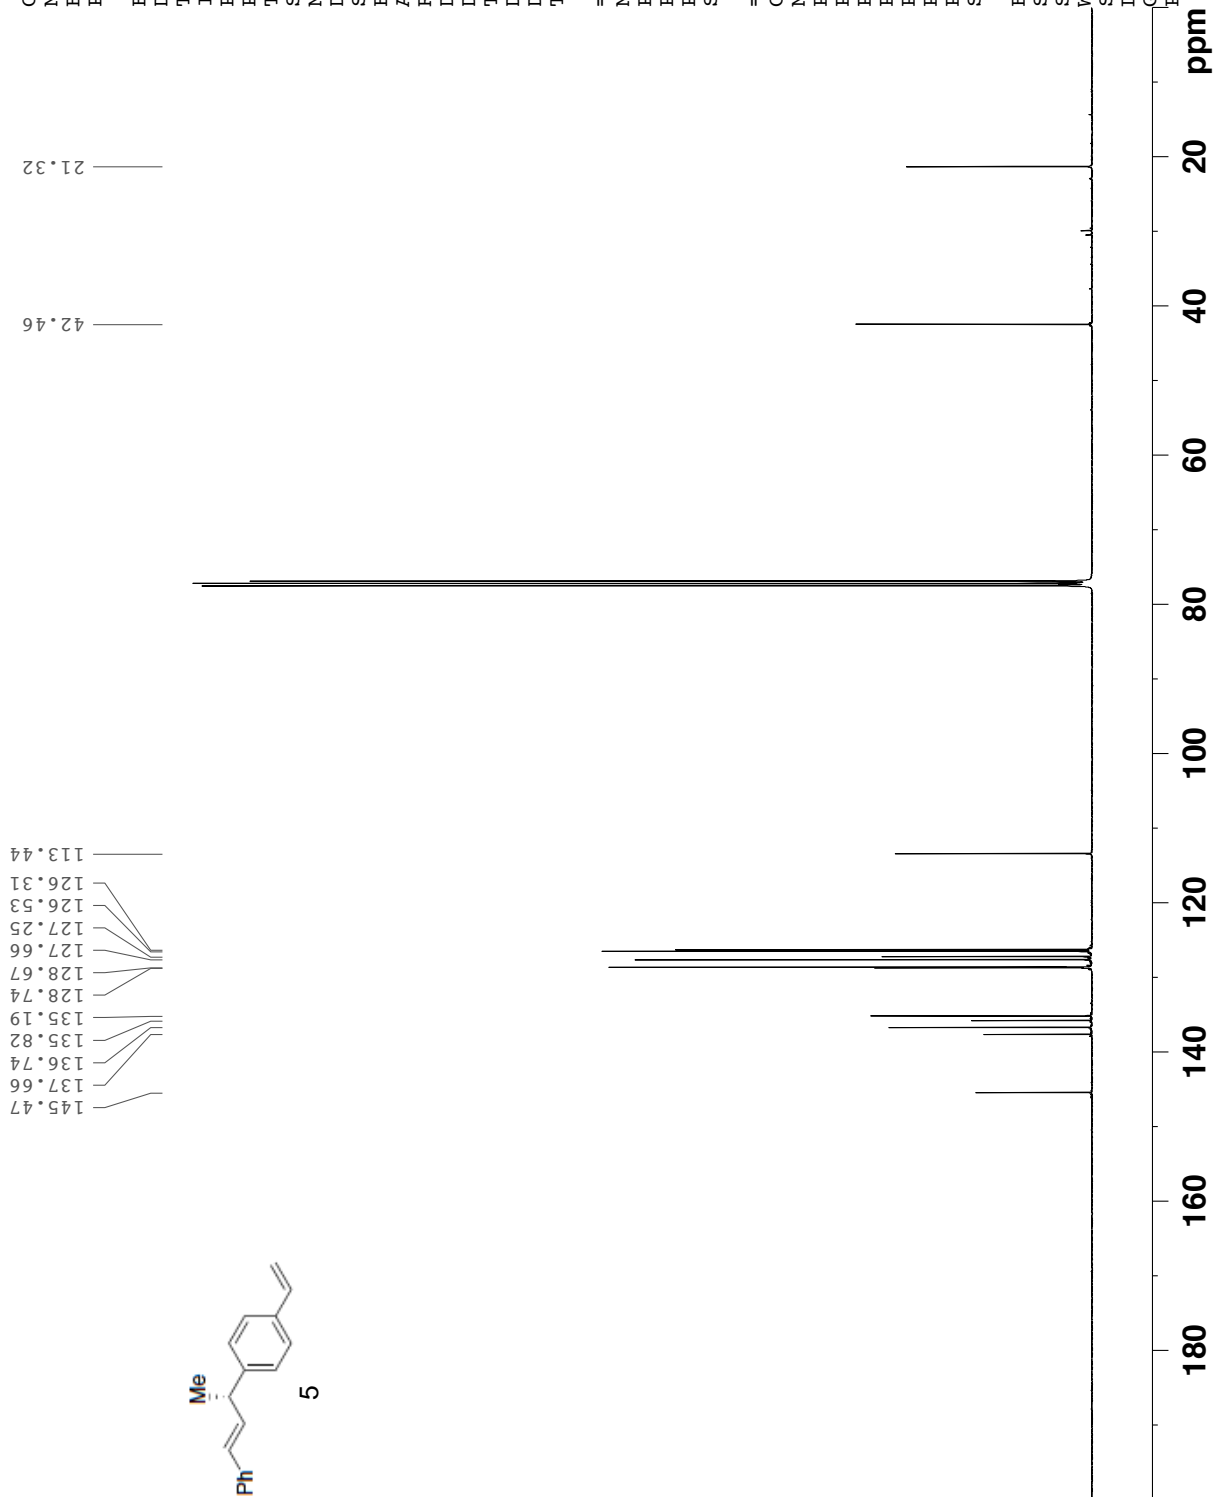



compound 6

7.330  
7.326  
7.312  
7.293  
7.260  
7.257  
7.252  
7.243  
7.241  
7.236  
7.227  
7.222  
7.204  
7.048  
7.041  
7.035  
7.019  
7.014  
7.002  
6.997  
6.989  
6.438  
6.398  
6.386  
6.371  
6.346  
6.331  
3.681  
3.664  
3.647  
3.631  
3.614

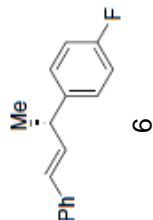

1.474  
1.457

Current Data Parameters  
NAME HH-4-242  
EXPNO 1  
PROCNO 1

F2 - Acquisition Parameters  
Date\_ 20130413  
Time\_ 5.33  
INSTRUM spect  
PROBHD 5 mm CPQNP 1H/  
PULPROG zg30  
TD 65536  
SOLVENT CDCl3  
NS 16  
DS 2  
SWH 8278.146 Hz  
FIDRES 0.126314 Hz  
AQ 3.9584243 sec  
RG 8  
DW 60.400 usec  
DE 6.00 usec  
TE 298.1 K  
D1 1.00000000 sec  
TD0 1

==== CHANNEL f1 =====  
NUC1 1H  
P1 15.00 usec  
PL1 4.90 dB  
PL1W 3.30822015 W  
SFO1 400.1324710 MHz

F2 - Processing parameters  
SI 32768  
SF 400.1300092 MHz  
WDW EM  
SSB 0  
LB 0.30 Hz  
GB 0  
PC 1.00

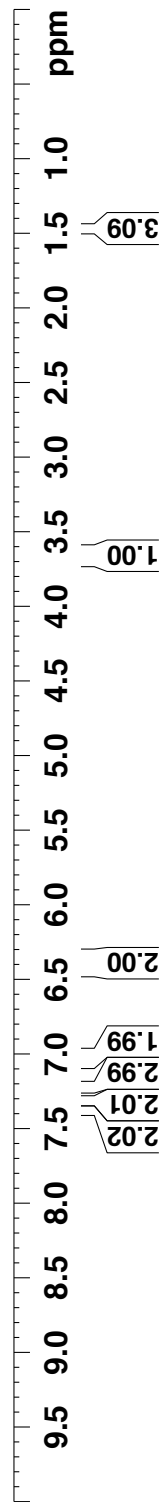



compound 6

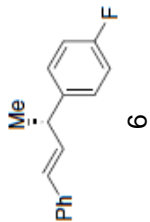

162.76  
160.34  
141.39  
141.36  
137.55  
135.14  
128.90  
128.81  
128.80  
128.70  
127.33  
126.31  
115.46  
115.25

41.97  
21.49

Current Data Parameters  
NAME HH-4-242  
EXPNO 2  
PROCNO 1

F2 - Acquisition Parameters  
Date\_ 20130413  
Time 6.34  
INSTRUM spect  
PROBHD 5 mm CPQNP 1H/  
PULPROG zgpg30  
TD 65536  
SOLVENT CDCl3  
NS 1024  
DS 4  
SWH 23980.814 Hz  
FIDRES 0.365918 Hz  
AQ 1.3664756 sec  
RG 512  
DW 20.850 usec  
DE 18.00 usec  
TE 298.2 K  
D1 2.00000000 sec  
D11 0.03000000 sec  
TD0 1

=====  
CHANNEL f1  
NUC1 13C  
P1 9.25 usec  
PL1 0.55 dB  
PL1W 35.18820572 W  
SFO1 100.6228298 MHz

=====  
CHANNEL f2  
CPDPRG2 waltz16  
NUC2 1H  
PCPD2 90.00 usec  
PL2 4.90 dB  
PL12 20.46 dB  
PL13 21.00 dB  
PL2W 3.30822015 W  
PL12W 0.09195905 W  
PL13W 0.08120718 W  
SFO2 400.1316005 MHz

F2 - Processing parameters  
SI 32768  
SF 100.6127555 MHz  
WDW EM  
SSB 0  
LB 1.00 Hz  
GB 0  
PC 1.40

180 160 140 120 100 80 60 40 20 ppm



compound 7

Current Data Parameters  
NAME HH-4-243  
EXPNO 1  
PROCNO 1

F2 - Acquisition Parameters  
Date\_ 20130413  
Time\_ 6.40  
INSTRUM spect  
PROBHD 5 mm CPQNP 1H/  
PULPROG zg30  
TD 65536  
SOLVENT CDCl3  
NS 16  
DS 2  
SWH 8278.146 Hz  
FIDRES 0.126314 Hz  
AQ 3.9584243 sec  
RG 8  
DW 60.400 usec  
DE 6.00 usec  
TE 298.1 K  
D1 1.00000000 sec  
TD0 1

==== CHANNEL f1 =====  
NUC1 1H  
P1 15.00 usec  
PL1 4.90 dB  
PL1W 3.30822015 W  
SFO1 400.1324710 MHz

F2 - Processing parameters  
SI 32768  
SF 400.1300097 MHz  
WDW EM  
SSB 0  
LB 0.30 Hz  
GB 0  
PC 1.00

1.469  
1.452

3.668  
3.651  
3.634  
3.617  
3.600

7.381  
7.378  
7.360  
7.329  
7.324  
7.310  
7.289  
7.283  
7.260  
7.244  
7.241  
7.237  
7.223  
7.202  
6.437  
6.397  
6.372  
6.356  
6.332  
6.316

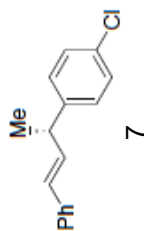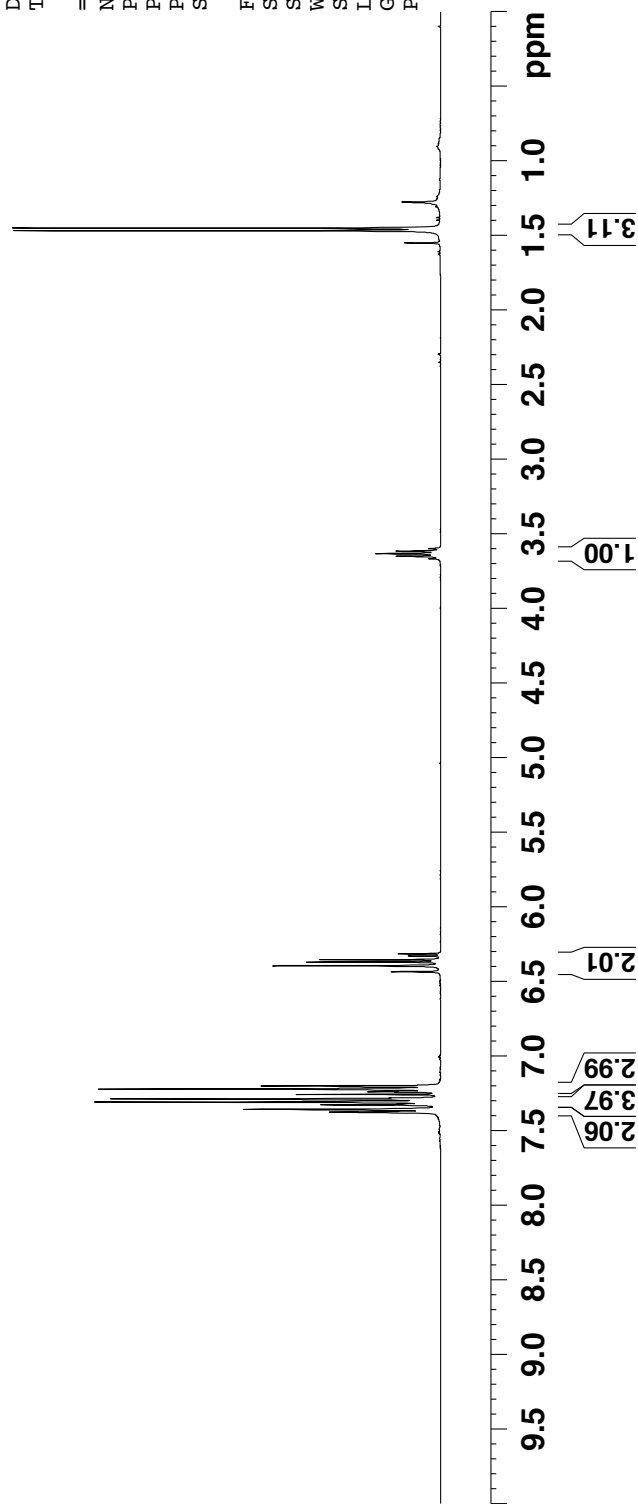



compound 7

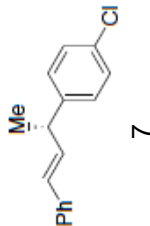

144.21  
137.47  
134.73  
132.04  
129.05  
128.87  
128.87  
128.74  
128.71  
127.39  
126.32

42.11  
21.33

Current Data Parameters  
NAME HH-4-243  
EXPNO 2  
PROCNO 1

F2 - Acquisition Parameters  
Date\_ 20130413  
Time 7.40  
INSTRUM spect  
PROBHD 5 mm CPQNP 1H/  
PULPROG zgpg30  
TD 65536  
SOLVENT CDC13  
NS 1024  
DS 4  
SWH 23980.814 Hz  
FIDRES 0.365918 Hz  
AQ 1.3664756 sec  
RG 512  
DW 20.850 usec  
DE 18.00 usec  
TE 298.2 K  
D1 2.00000000 sec  
D11 0.03000000 sec  
TD0 1

==== CHANNEL f1 =====  
NUC1 13C  
P1 9.25 usec  
PL1 0.55 dB  
PL1W 35.18820572 W  
SFO1 100.6228298 MHz

==== CHANNEL f2 =====  
CPDPRG2 waltz16  
NUC2 1H  
PCPD2 90.00 usec  
PL2 4.90 dB  
PL12 20.46 dB  
PL13 21.00 dB  
PL2W 3.30822015 W  
PL12W 0.09195905 W  
PL13W 0.08120718 W  
SFO2 400.1316005 MHz

F2 - Processing parameters  
SI 32768  
SF 100.6127555 MHz  
WDW EM  
SSB 0  
LB 1.00 Hz  
GB 0  
PC 1.40

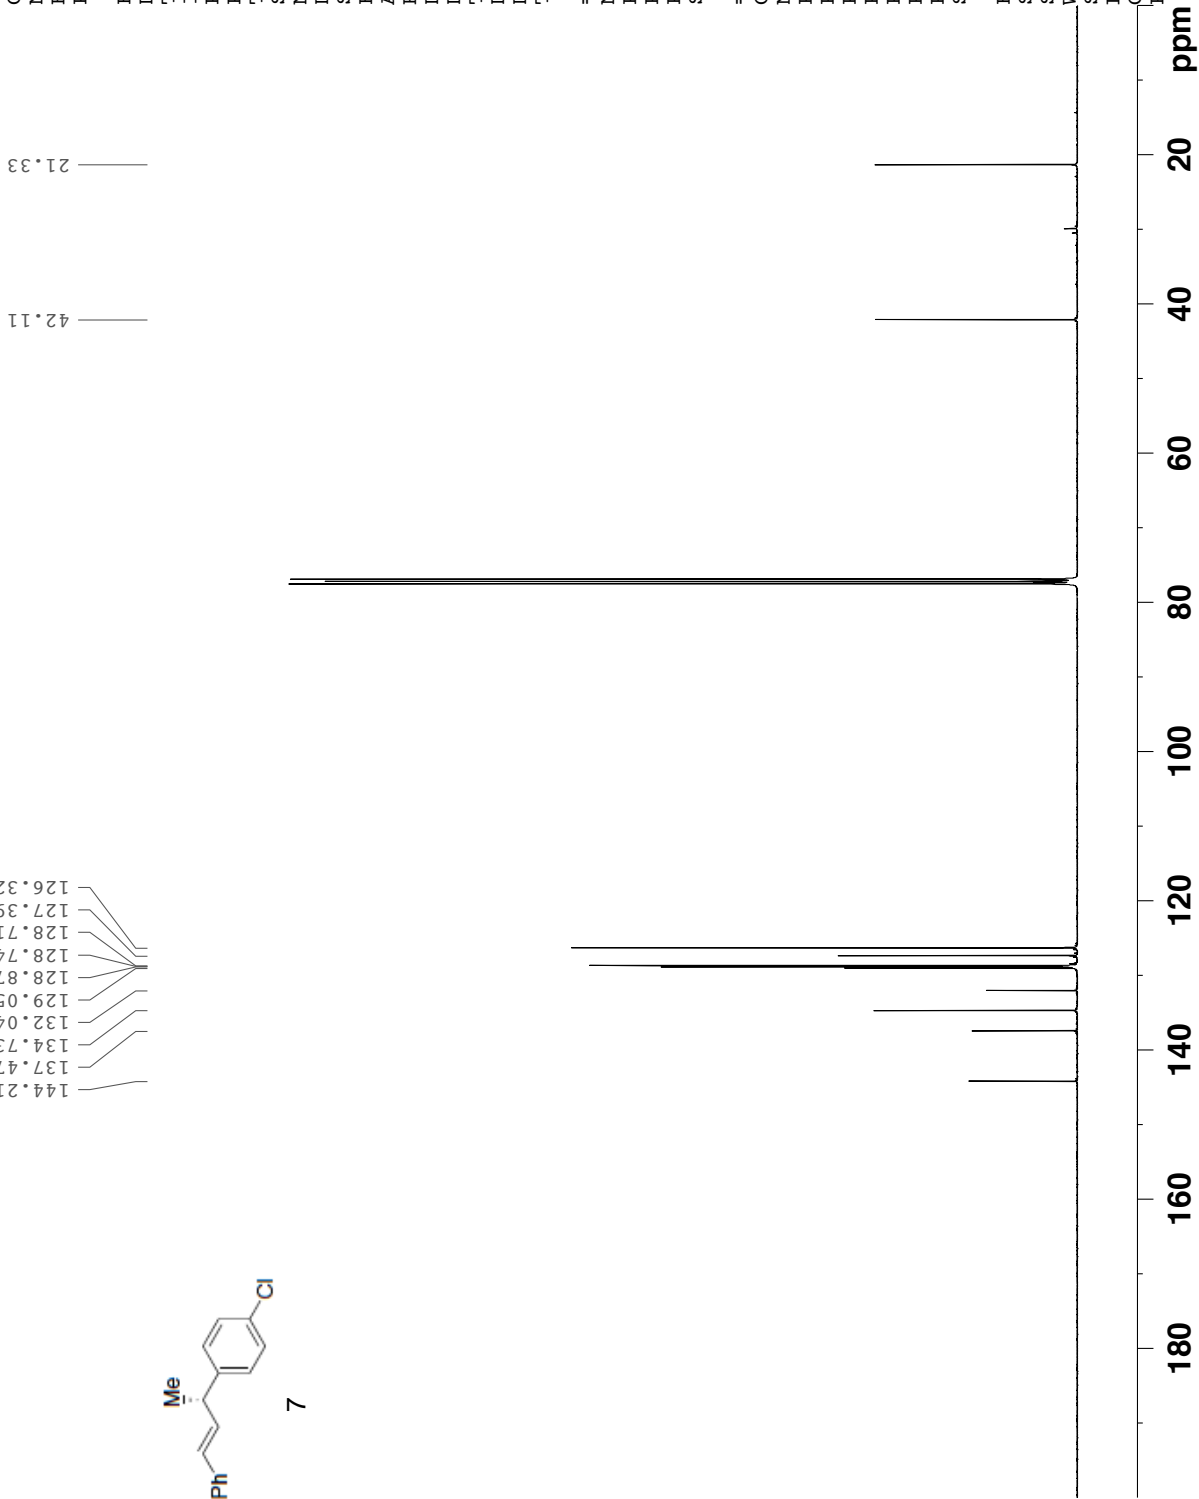



compound 8

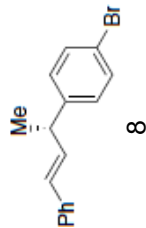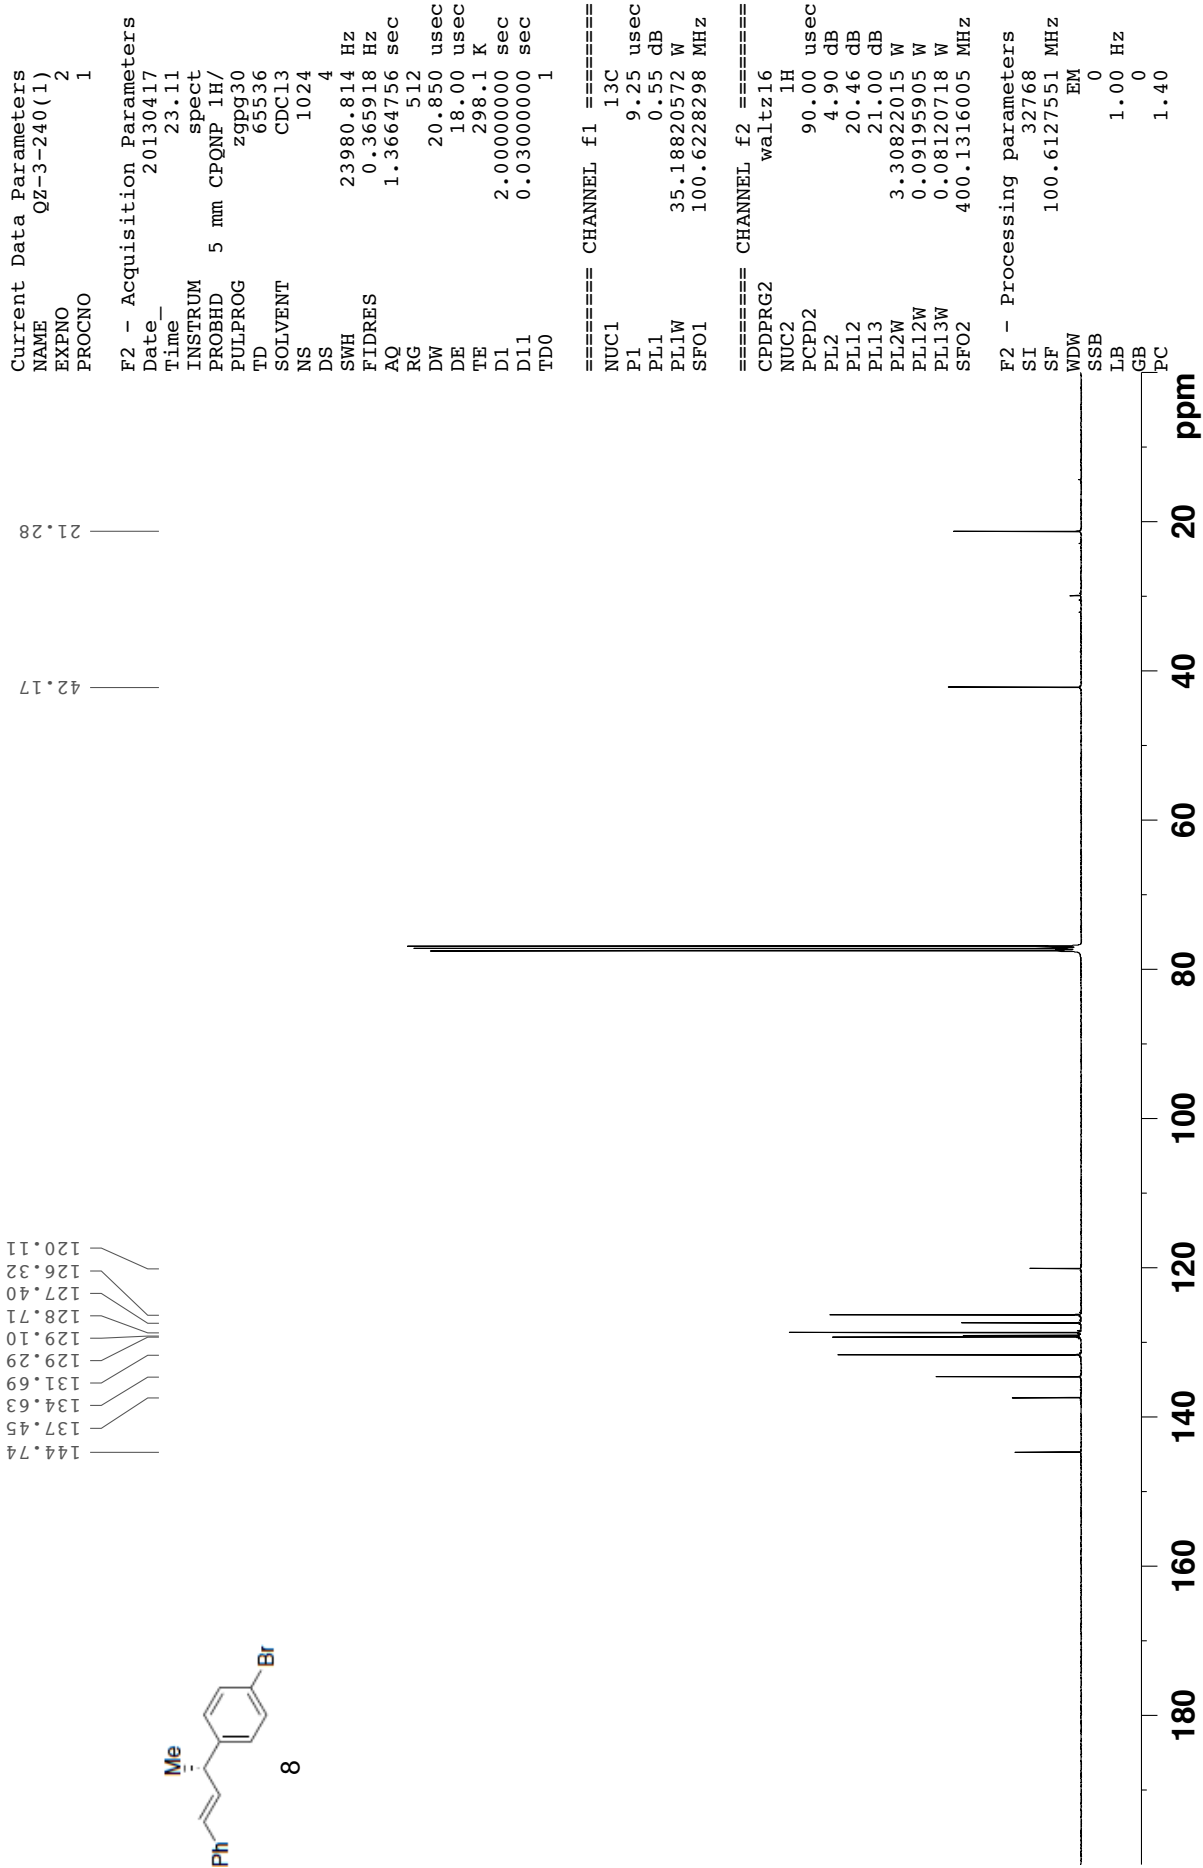



compound 9

Current Data Parameters  
NAME HH-4-258A  
EXPNO 1  
PROCNO 1

F2 - Acquisition Parameters  
Date\_ 20130513  
Time\_ 12.30  
INSTRUM spect  
PROBHD 5 mm CPQNP 1H/  
PULPROG zg30  
TD 65536  
SOLVENT CDCl3  
NS 16  
DS 2  
SWH 8278.146 Hz  
FIDRES 0.126314 Hz  
AQ 3.9584243 sec  
RG 9  
DW 60.400 usec  
DE 6.00 usec  
TE 298.2 K  
D1 1.00000000 sec  
TD0 1

==== CHANNEL f1 =====  
NUC1 1H  
P1 15.00 usec  
PL1 4.90 dB  
PL1W 3.30822015 W  
SFO1 400.1324710 MHz

F2 - Processing parameters  
SI 32768  
SF 400.1300094 MHz  
WDW EM  
SSB 0  
LB 0.30 Hz  
GB 0  
PC 1.00

7.592  
7.572  
7.403  
7.328  
7.324  
7.310  
7.291  
7.260  
7.247  
7.243  
7.240  
7.231  
7.225  
7.220  
7.207  
6.997  
6.463  
6.423  
6.383  
6.367  
6.343  
6.327  
3.749  
3.732  
3.715  
3.698  
3.681  
1.502  
1.485

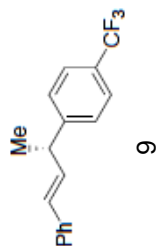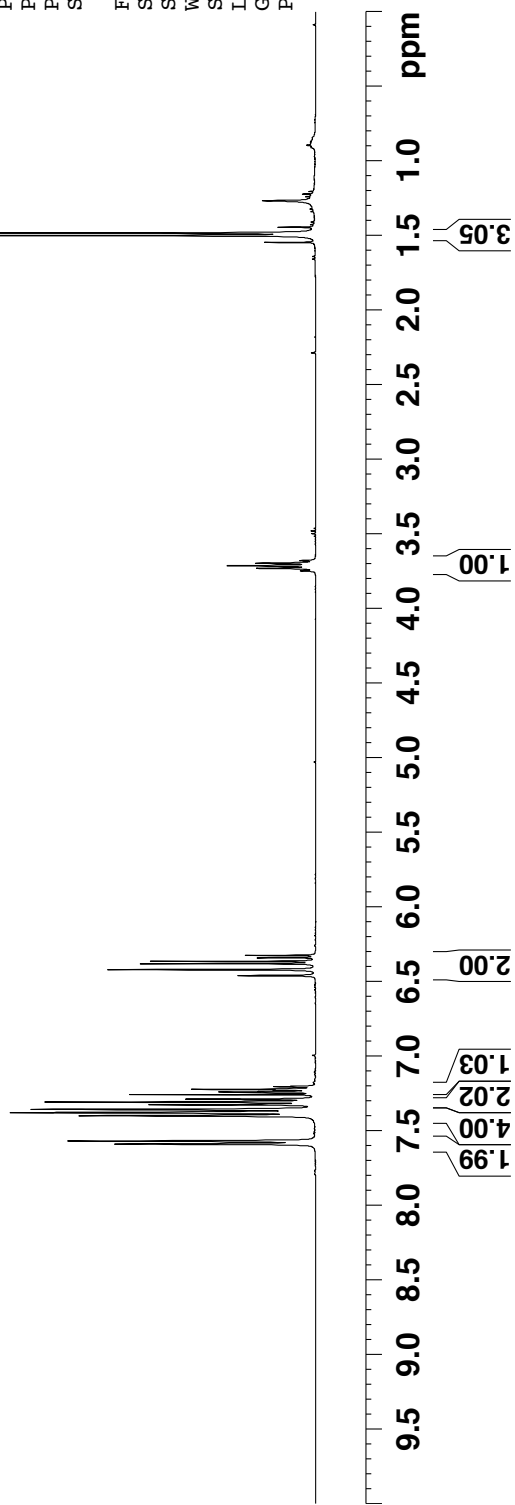

compound 9

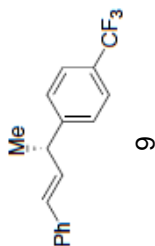

149.84  
137.32  
134.16  
129.46  
128.86  
128.73  
128.54  
128.51  
128.22  
127.83  
127.50  
126.35  
125.66  
125.62  
125.59  
125.55  
123.11  
120.41

42.61  
21.24

Current Data Parameters  
NAME HH-4-258A  
EXPNO 2  
PROCNO 1

F2 - Acquisition Parameters  
Date\_ 20130513  
Time\_ 22.23  
INSTRUM spect  
PROBHD 5 mm CPQNP 1H/  
PULPROG zgpg30  
TD 65536  
SOLVENT CDC13  
NS 1024  
DS 4  
SWH 23980.814 Hz  
FIDRES 0.365918 Hz  
AQ 1.3664756 sec  
RG 512  
DW 20.850 usec  
DE 18.00 usec  
TE 298.2 K  
D1 2.00000000 sec  
D11 0.03000000 sec  
TD0 1

==== CHANNEL f1 =====  
NUC1 13C  
P1 9.25 usec  
PL1 0.55 dB  
PL1W 35.18820572 W  
SFO1 100.6228298 MHz

==== CHANNEL f2 =====  
CPDPRG2 waltz16  
NUC2 1H  
PCPD2 90.00 usec  
PL2 4.90 dB  
PL12 20.46 dB  
PL13 21.00 dB  
PL2W 3.30822015 W  
PL12W 0.09195905 W  
PL13W 0.08120718 W  
SFO2 400.1316005 MHz

F2 - Processing parameters  
SI 32768  
SF 100.6127547 MHz  
WDW EM  
SSB 0  
LB 1.00 Hz  
GB 0  
PC 1.40

180 160 140 120 100 80 60 40 20 ppm



compound 10

Current Data Parameters  
 NAME HH-4-241A  
 EXPNO 1  
 PROCNO 1

F2 - Acquisition Parameters  
 Date\_ 20130413  
 Time\_ 4.26  
 INSTRUM spect  
 PROBHD 5 mm CPQNP 1H/  
 PULPROG zg30  
 TD 65536  
 SOLVENT CDCl3  
 NS 16  
 DS 2  
 SWH 8278.146 Hz  
 FIDRES 0.126314 Hz  
 AQ 3.9584243 sec  
 RG 5.7  
 DW 60.400 usec  
 DE 6.00 usec  
 TE 298.1 K  
 D1 1.00000000 sec  
 TDO 1

==== CHANNEL f1 =====  
 NUC1 1H  
 P1 15.00 usec  
 PL1 4.90 dB  
 PL1W 3.30822015 W  
 SFO1 400.1324710 MHz

F2 - Processing parameters  
 SI 32768  
 SF 400.1300093 MHz  
 WDW EM  
 SSB 0  
 LB 0.30 Hz  
 GB 0  
 PC 1.00

8.020  
7.999  
7.379  
7.364  
7.364  
7.344  
7.327  
7.309  
7.290  
7.260  
7.240  
7.222  
7.204  
6.459  
6.419  
6.395  
6.380  
6.356  
6.340  
3.918  
3.744  
3.727  
3.710  
3.693  
3.676  
1.501  
1.484

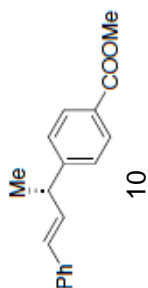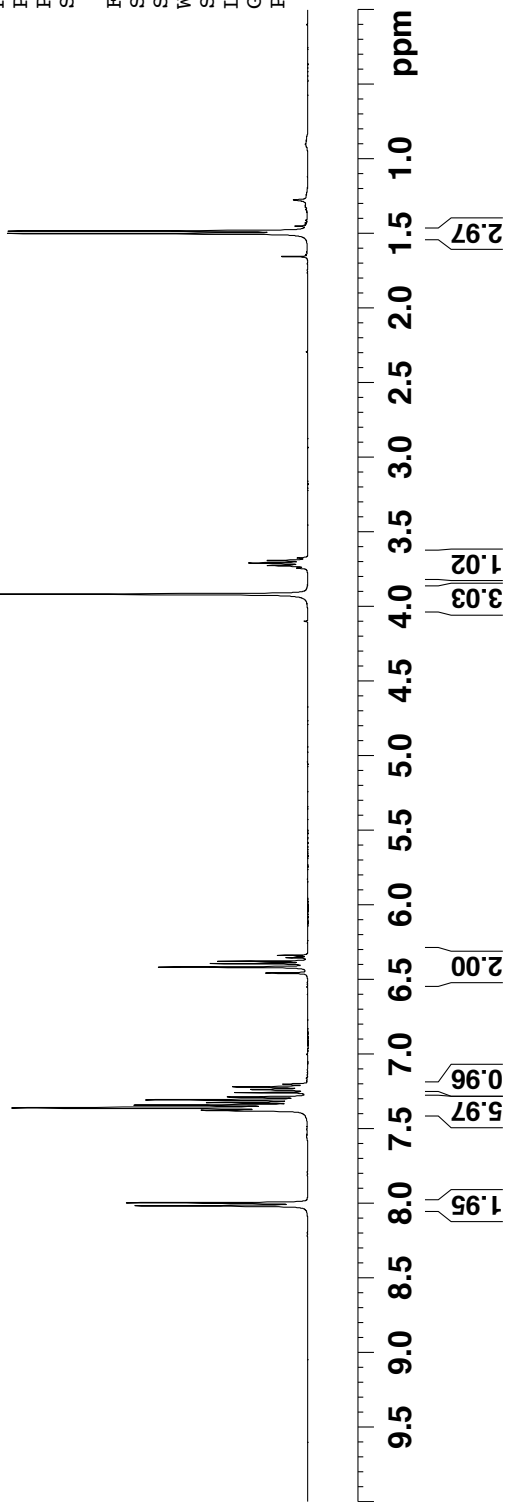



compound 10

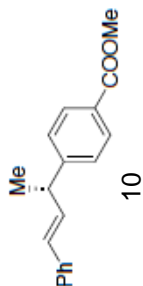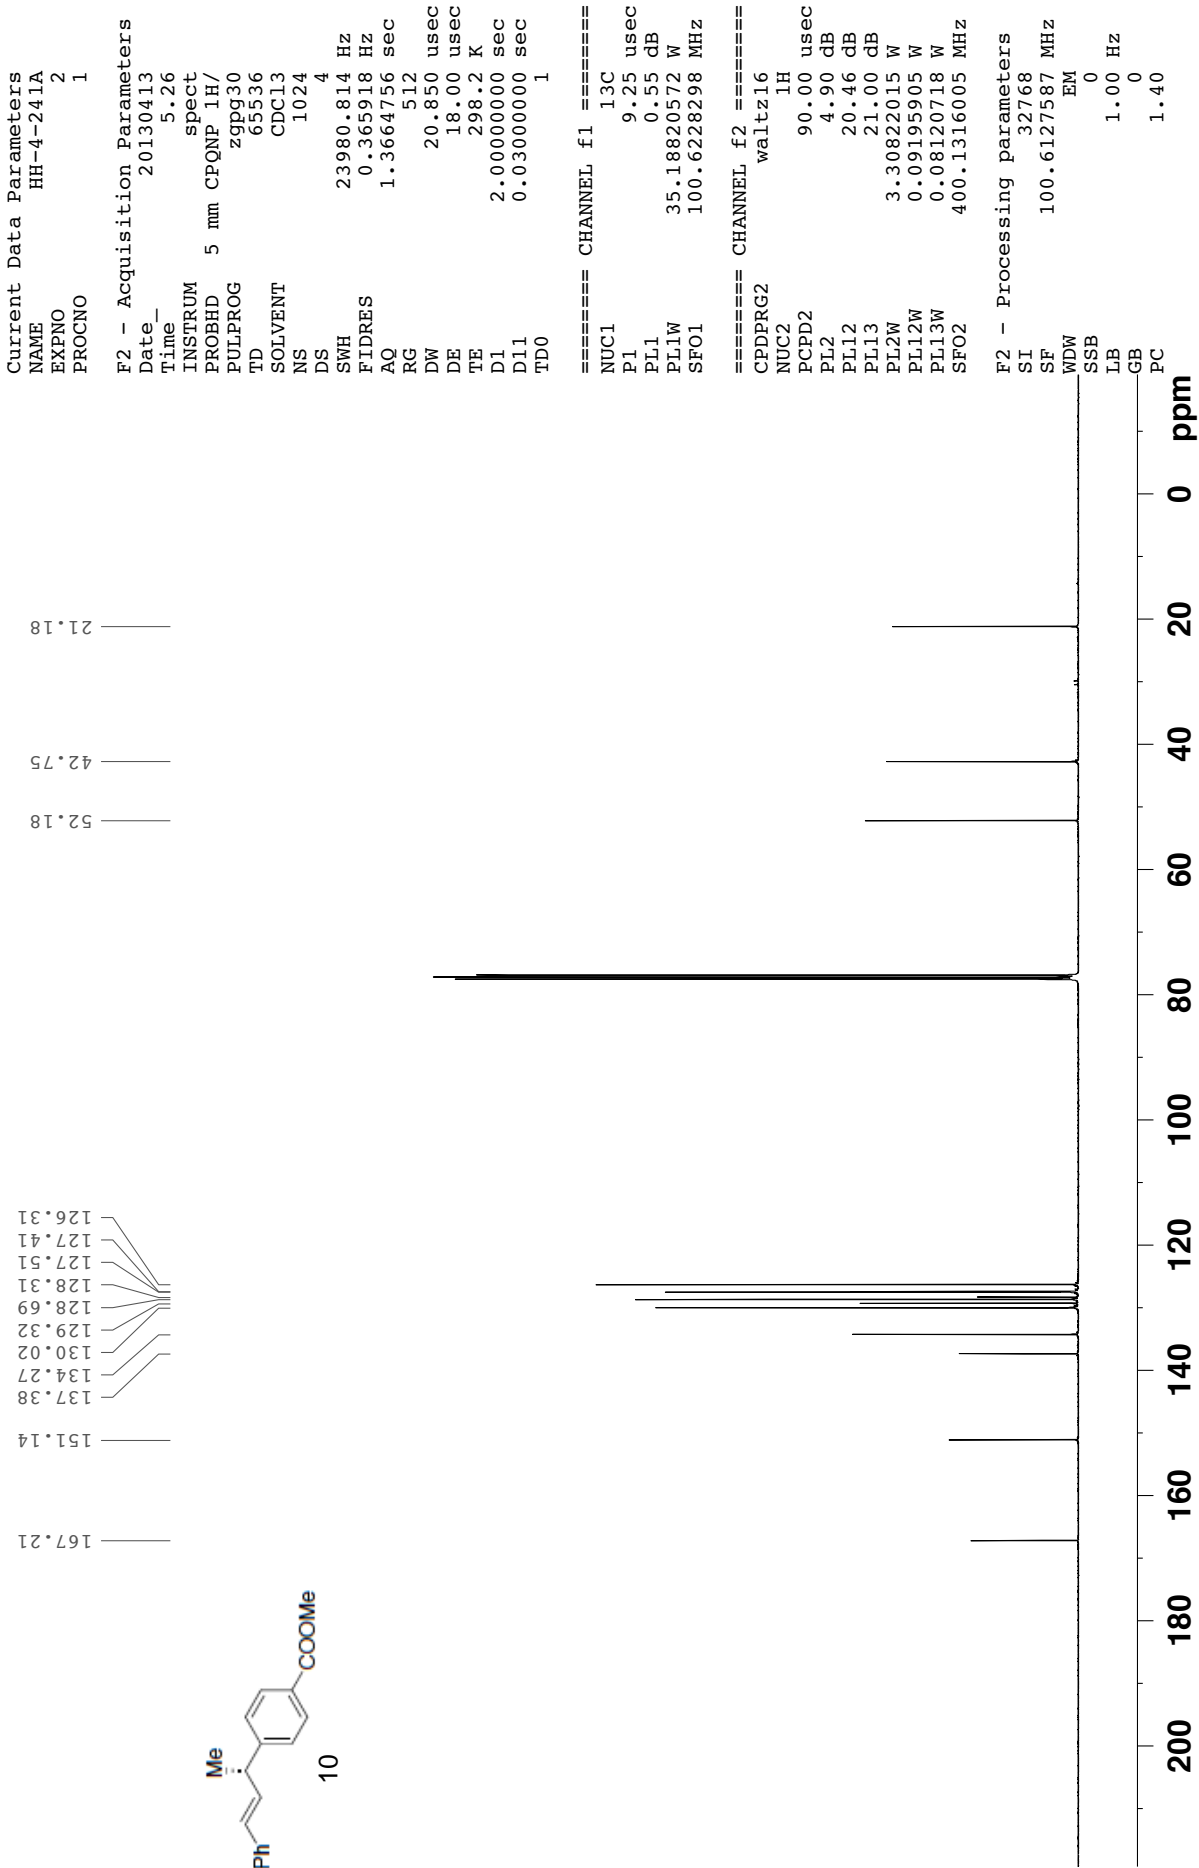



compound 11

Current Data Parameters  
NAME HH-4-262A  
EXPNO 1  
PROCNO 1

F2 - Acquisition Parameters  
Date\_ 20130517  
Time\_ 18.28  
INSTRUM spect  
PROBHD 5 mm CPQNP 1H/  
PULPROG zg30  
TD 65536  
SOLVENT CDCl3  
NS 16  
DS 2  
SWH 8278.146 Hz  
FIDRES 0.126314 Hz  
AQ 3.9584243 sec  
RG 7.1  
DW 60.400 usec  
DE 6.00 usec  
TE 298.1 K  
D1 1.00000000 sec  
TD0 1

==== CHANNEL f1 =====  
NUC1 1H  
P1 15.00 usec  
PL1 4.90 dB  
PL1W 3.30822015 W  
SFO1 400.1324710 MHz

F2 - Processing parameters  
SI 32768  
SF 400.1300092 MHz  
WDW EM  
SSB 0  
LB 0.30 Hz  
GB 0  
PC 1.00

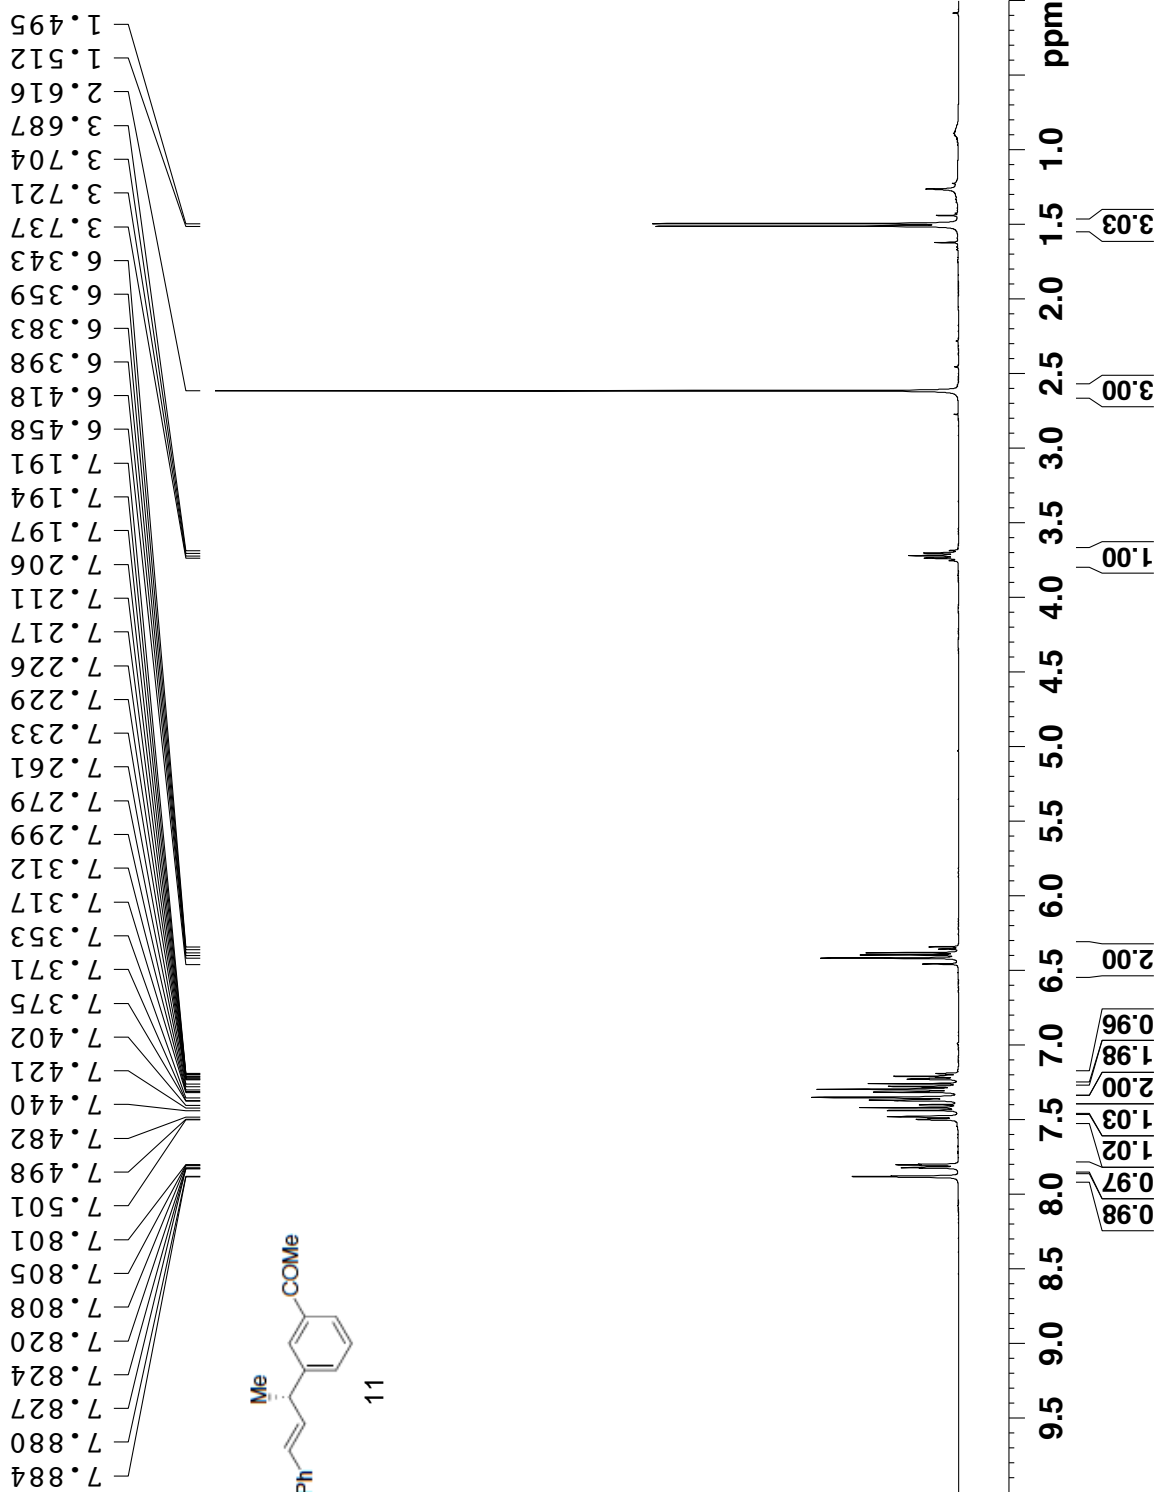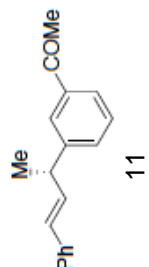





compound 11

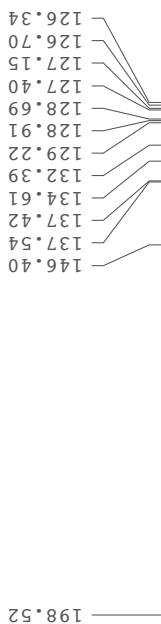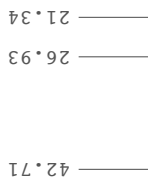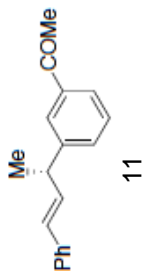

Current Data Parameters  
NAME HH-4-262A  
EXPNO 2  
PROCNO 1

F2 - Acquisition Parameters  
Date\_ 20130517  
Time 18.32  
INSTRUM spect  
PROBHD 5 mm CPQNP 1H/  
PULPROG zgpg30  
TD 65536  
SOLVENT CDC13  
NS 32  
DS 4  
SWH 23980.814 Hz  
FIDRES 0.365918 Hz  
AQ 1.3664756 sec  
RG 512  
DW 20.850 usec  
DE 18.00 usec  
TE 298.2 K  
D1 2.00000000 sec  
D11 0.03000000 sec  
TD0 1

==== CHANNEL f1 =====  
NUC1 13C  
P1 9.25 usec  
PL1 0.55 dB  
PL1W 35.18820572 W  
SFO1 100.6228298 MHz

==== CHANNEL f2 =====  
CPDPRG2 waltz16  
NUC2 1H  
PCPD2 90.00 usec  
PL2 4.90 dB  
PL12 20.46 dB  
PL13 21.00 dB  
PL2W 3.30822015 W  
PL12W 0.09195905 W  
PL13W 0.08120718 W  
SFO2 400.1316005 MHz

F2 - Processing parameters  
SI 32768  
SF 100.6127558 MHz  
WDW EM  
SSB 0  
LB 1.00 Hz  
GB 0  
PC 1.40

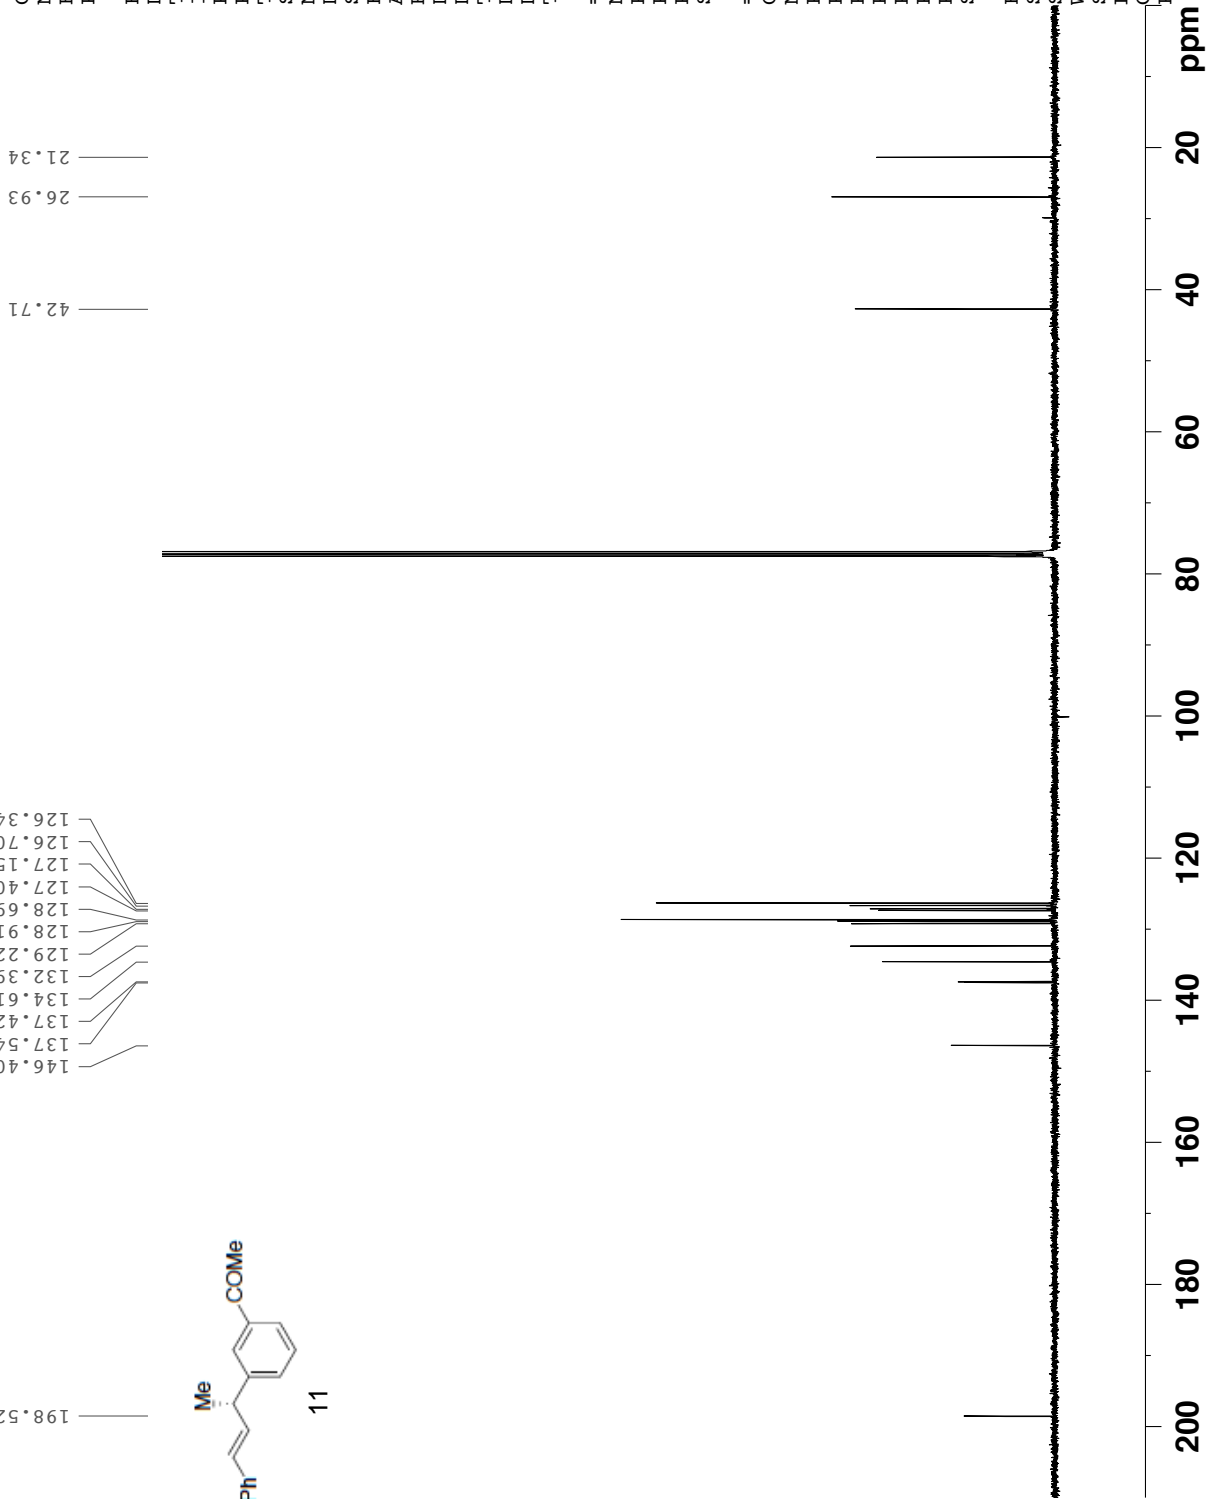

compound 12



Current Data Parameters  
NAME HH-4-240  
EXPNO 1  
PROCNO 1

F2 - Acquisition Parameters  
Date\_ 20130411  
Time\_ 18.37  
INSTRUM spect  
PROBHD 5 mm CPQNP 1H/  
PULPROG zg30  
TD 65536  
SOLVENT CDCl3  
NS 16  
DS 2  
SWH 8278.146 Hz  
FIDRES 0.126314 Hz  
AQ 3.9584243 sec  
RG 10.1  
DW 60.400 usec  
DE 6.00 usec  
TE 298.1 K  
D1 1.00000000 sec  
TDO 1

==== CHANNEL f1 =====  
NUC1 1H  
P1 15.00 usec  
PL1 4.90 dB  
PL1W 3.30822015 W  
SFO1 400.1324710 MHz

F2 - Processing parameters  
SI 32768  
SF 400.1300097 MHz  
WDW EM  
SSB 0  
LB 0.30 Hz  
GB 0  
PC 1.00

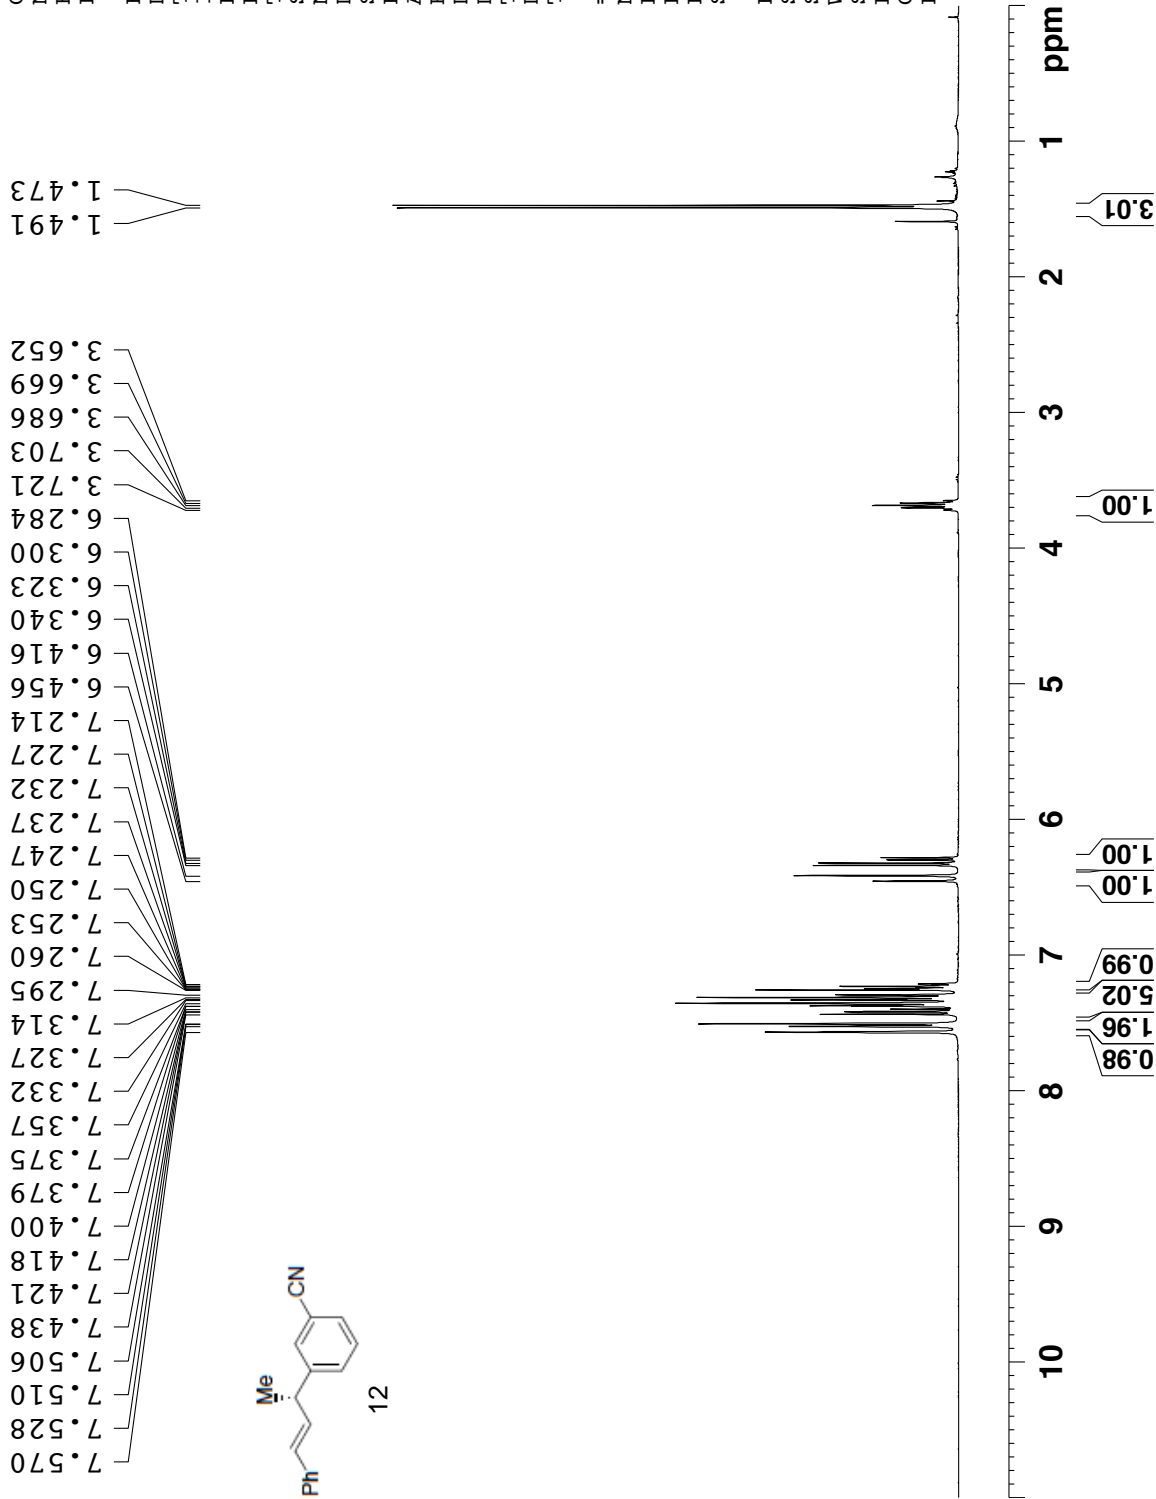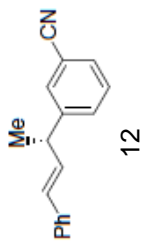

compound 12

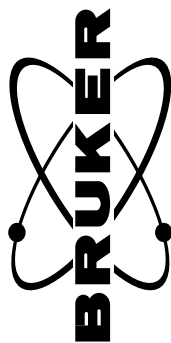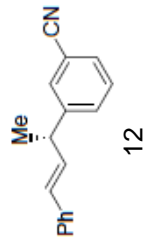

147.14  
137.09  
133.60  
132.18  
131.11  
130.20  
129.82  
129.44  
128.75  
127.62  
126.35  
119.20  
112.62

42.32  
21.10

Current Data Parameters  
NAME HH-4-240  
EXPNO 2  
PROCNO 1

F2 - Acquisition Parameters  
Date\_ 20130412  
Time 4.48  
INSTRUM spect  
PROBHD 5 mm CPQNP 1H/  
PULPROG zgpg30  
TD 65536  
SOLVENT CDC13  
NS 1024  
DS 4  
SWH 23980.814 Hz  
FIDRES 0.365918 Hz  
AQ 1.3664756 sec  
RG 512  
DW 20.850 usec  
DE 18.00 usec  
TE 298.2 K  
D1 2.00000000 sec  
D11 0.03000000 sec  
TD0 1

==== CHANNEL f1 =====  
NUC1 13C  
P1 9.25 usec  
PL1 0.55 dB  
PL1W 35.18820572 W  
SFO1 100.6228298 MHz

==== CHANNEL f2 =====  
CPDPRG2 waltz16  
NUC2 1H  
PCPD2 90.00 usec  
PL2 4.90 dB  
PL12 20.46 dB  
PL13 21.00 dB  
PL2W 3.30822015 W  
PL12W 0.09195905 W  
PL13W 0.08120718 W  
SFO2 400.1316005 MHz

F2 - Processing parameters  
SI 32768  
SF 100.6127574 MHz  
WDW EM  
SSB 0  
LB 1.00 Hz  
GB 0  
PC 1.40

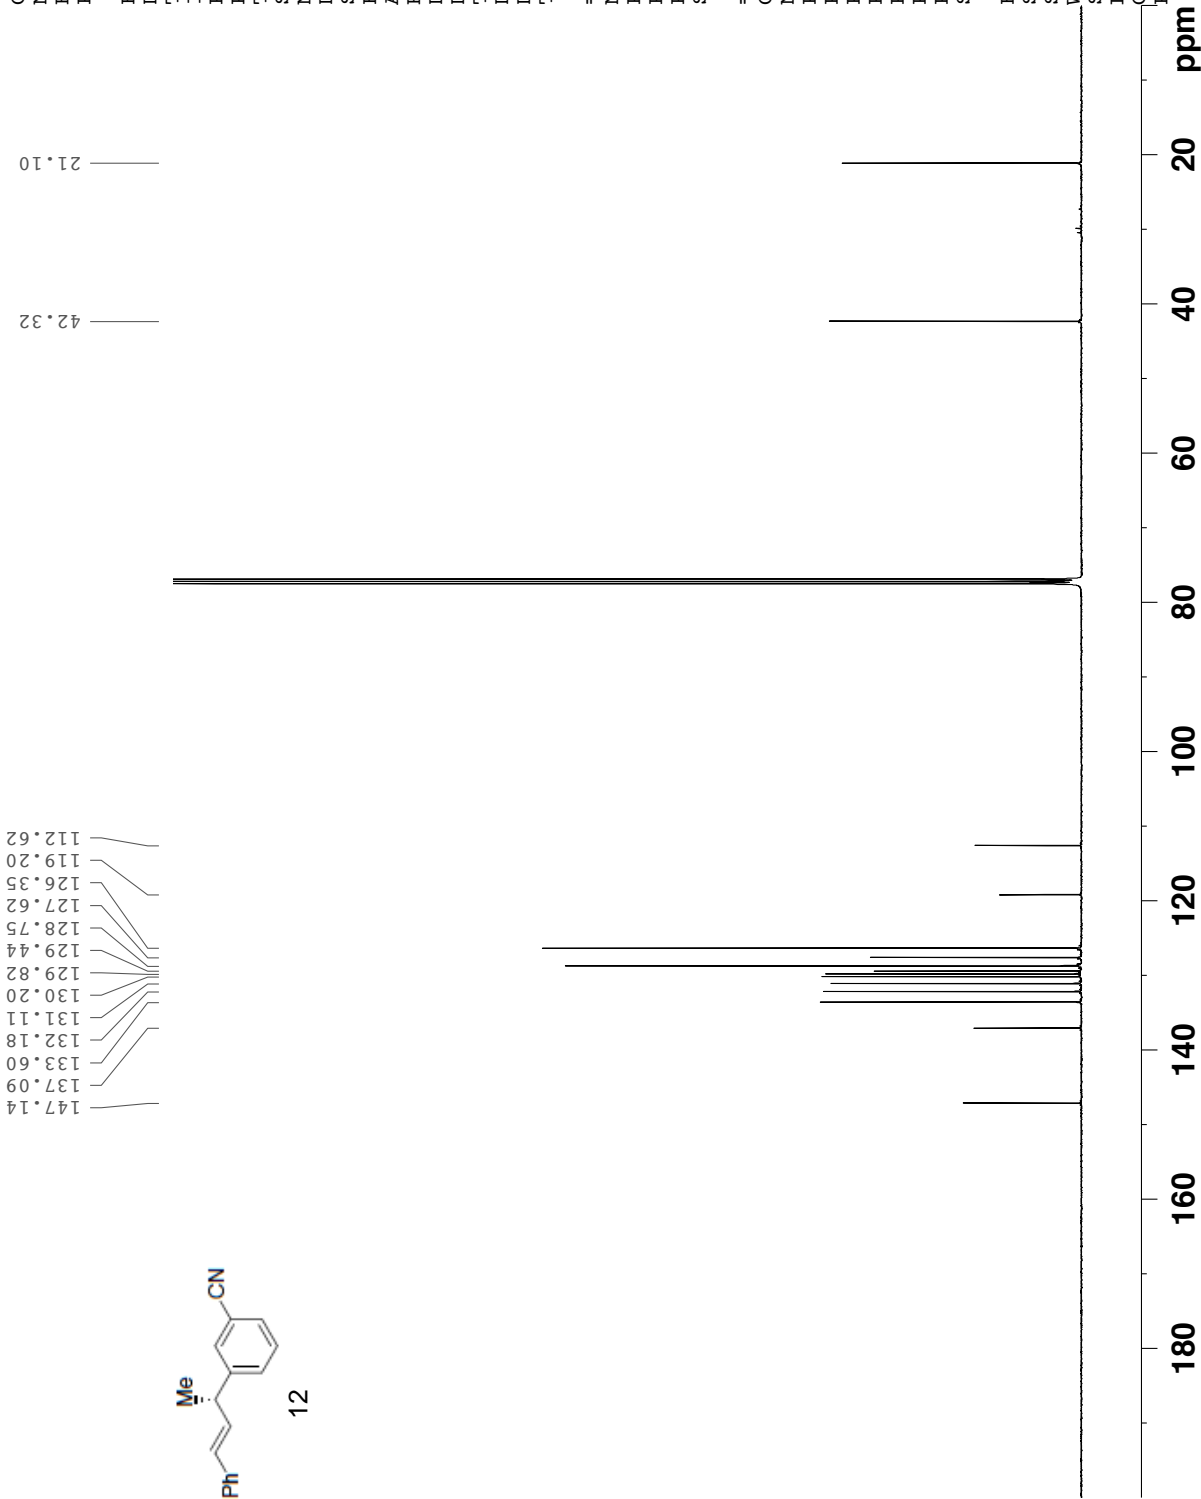



compound 13

Current Data Parameters  
NAME HH-4-249B  
EXPNO 1  
PROCNO 1

F2 - Acquisition Parameters  
Date\_ 20130429  
Time\_ 17.21  
INSTRUM spect  
PROBHD 5 mm CPQNP 1H/  
PULPROG zg30  
TD 65536  
SOLVENT CDCl3  
NS 16  
DS 2  
SWH 8278.146 Hz  
FIDRES 0.126314 Hz  
AQ 3.9584243 sec  
RG 11.3  
DW 60.400 usec  
DE 6.00 usec  
TE 298.1 K  
D1 1.00000000 sec  
TD0 1

==== CHANNEL f1 =====  
NUC1 1H  
P1 15.00 usec  
PL1 4.90 dB  
PL1W 3.30822015 W  
SFO1 400.1324710 MHz

F2 - Processing parameters  
SI 32768  
SF 400.1300095 MHz  
WDW EM  
SSB 0  
LB 0.30 Hz  
GB 0  
PC 1.00

7.369  
7.350  
7.312  
7.294  
7.274  
7.260  
7.220  
7.201  
7.183  
6.778  
6.774  
6.770  
6.759  
6.739  
6.736  
6.720  
6.716  
6.422  
6.413  
6.400  
6.382  
6.363  
6.348  
6.323  
6.308  
3.606  
3.589  
3.572  
3.556  
3.538  
1.438  
1.420

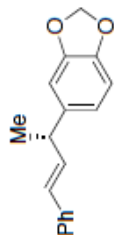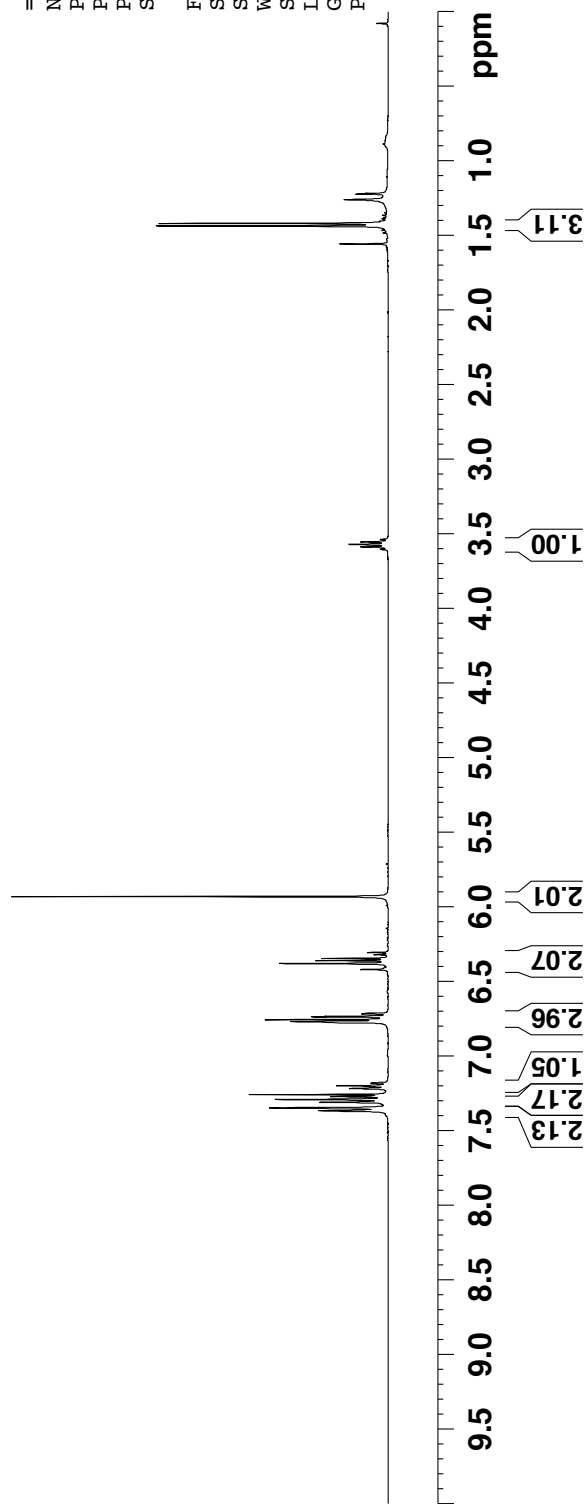

compound 13

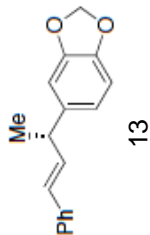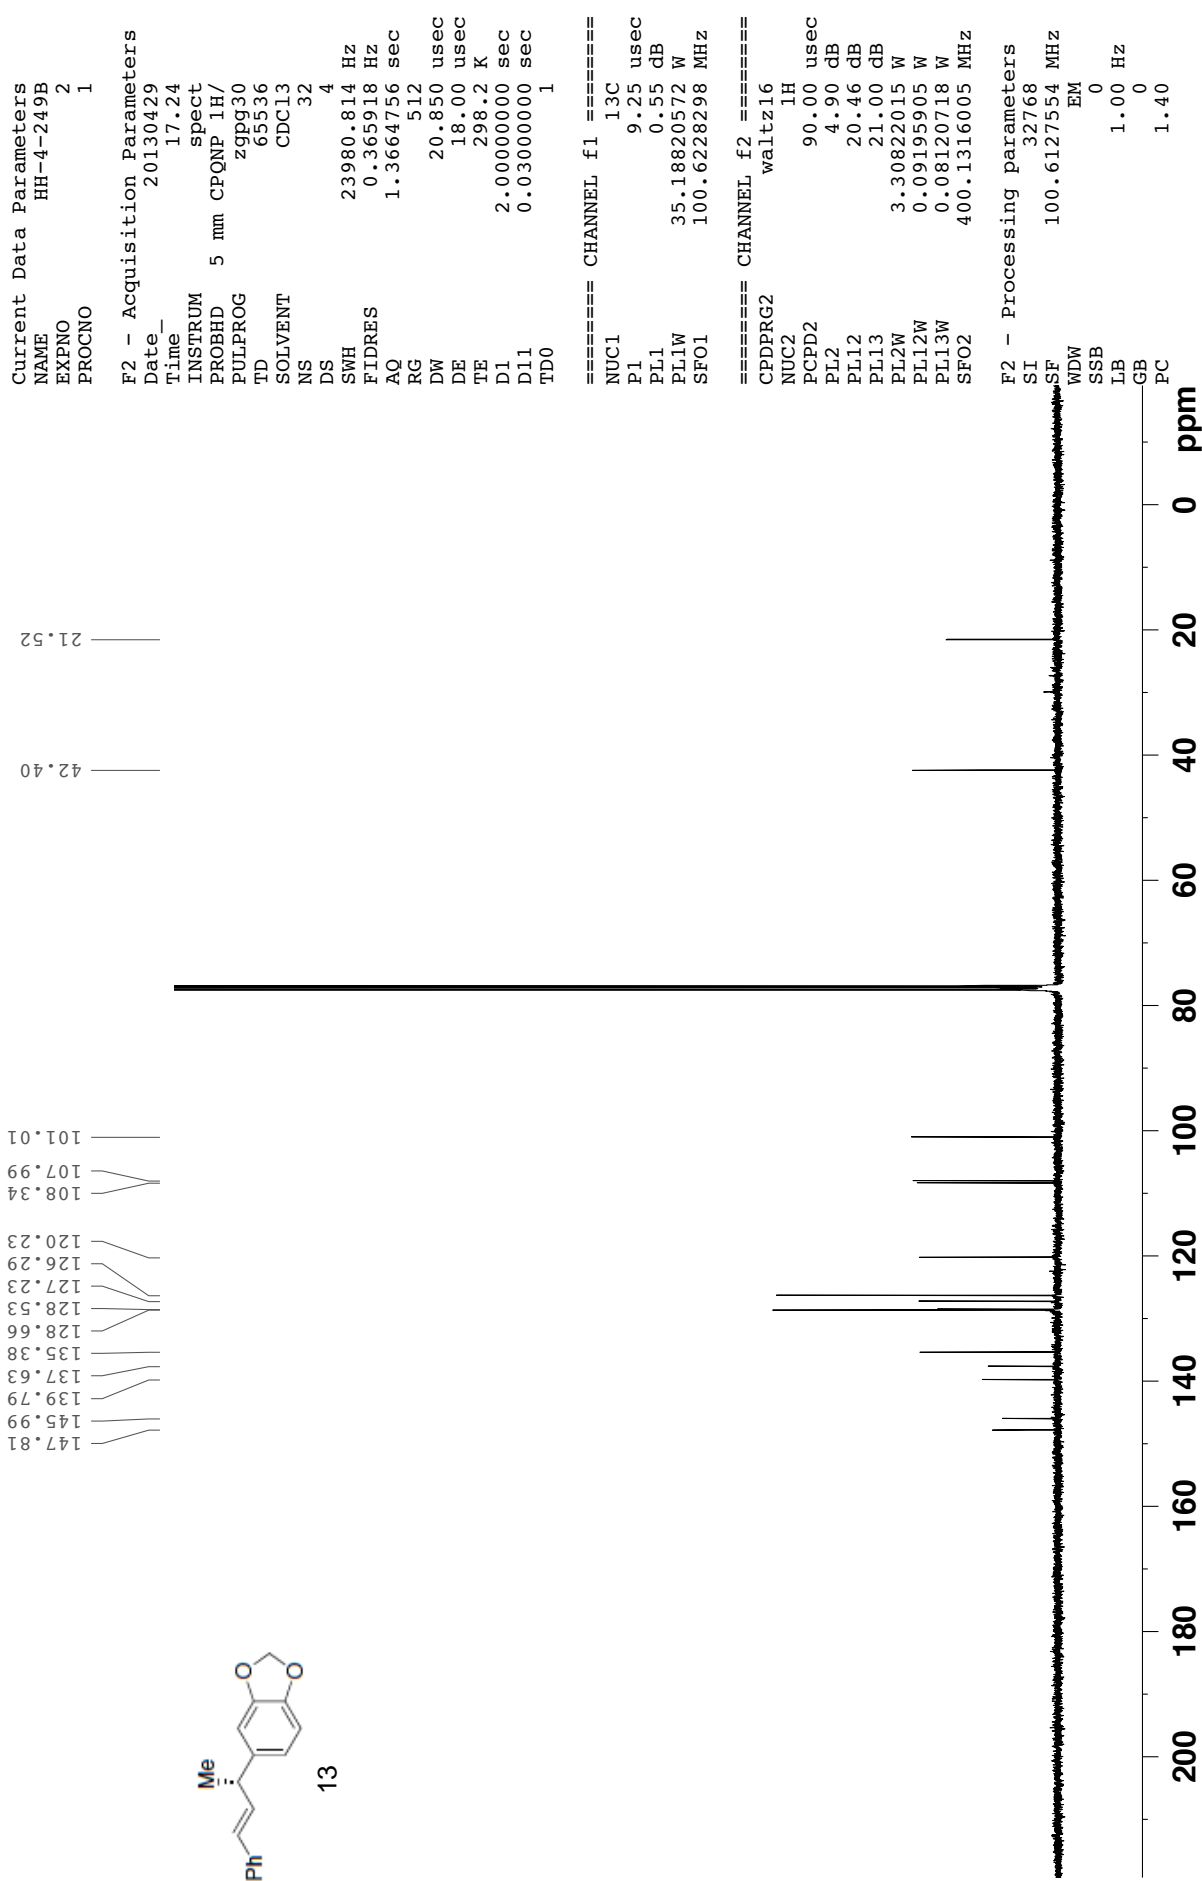



compound 14

Current Data Parameters  
NAME HH-4-264Br  
EXPNO 1  
PROCNO 1

F2 - Acquisition Parameters  
Date\_ 20130522  
Time\_ 13.42  
INSTRUM spect  
PROBHD 5 mm CPQNP 1H/  
PULPROG zg30  
TD 65536  
SOLVENT CDCl3  
NS 16  
DS 2  
SWH 8278.146 Hz  
FIDRES 0.126314 Hz  
AQ 3.9584243 sec  
RG 8  
DW 60.400 usec  
DE 6.00 usec  
TE 298.1 K  
D1 1.00000000 sec  
TD0 1

==== CHANNEL f1 =====  
NUC1 1H  
P1 15.00 usec  
PL1 4.90 dB  
PL1W 3.30822015 W  
SFO1 400.1324710 MHz

F2 - Processing parameters  
SI 32768  
SF 400.1300094 MHz  
WDW EM  
SSB 0  
LB 0.30 Hz  
GB 0  
PC 1.00

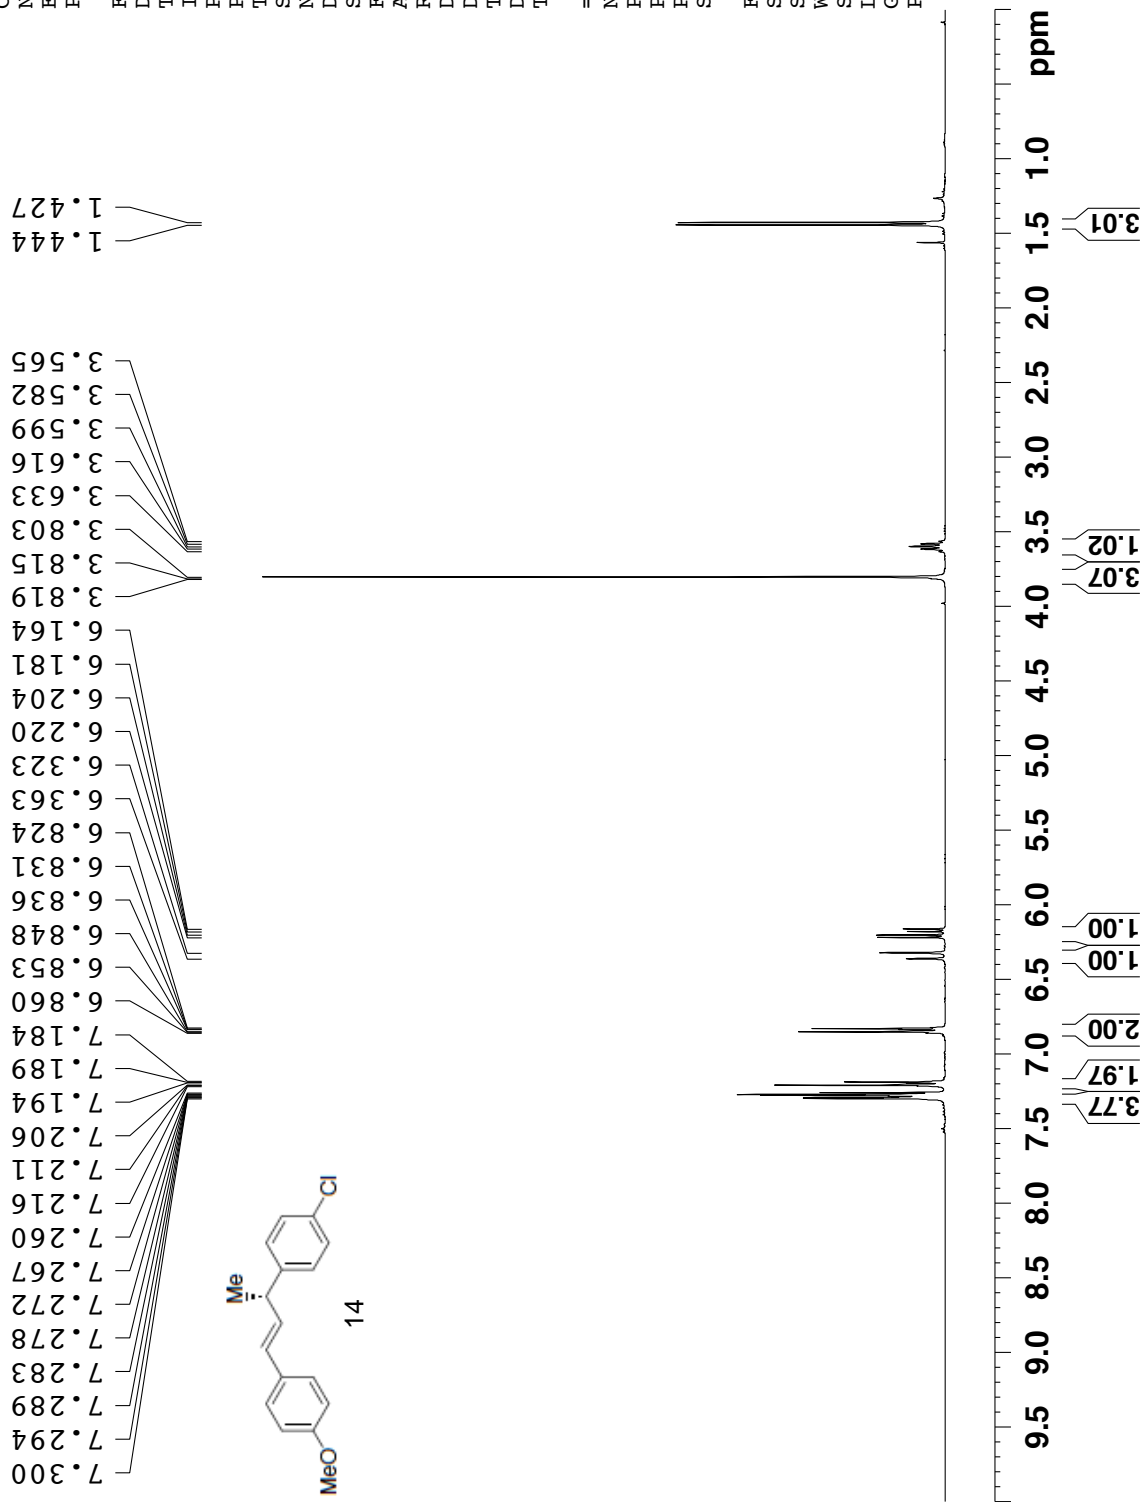

compound 14

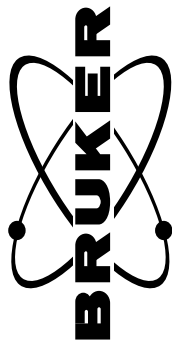

Current Data Parameters  
NAME HH-4-264Brs  
EXPNO 2  
PROCNO 1

F2 - Acquisition Parameters  
Date\_ 20130522  
Time 13.45  
INSTRUM spect  
PROBHD 5 mm CPQNP 1H/  
PULPROG zgpg30  
TD 65536  
SOLVENT CDC13  
NS 32  
DS 4  
SWH 23980.814 Hz  
FIDRES 0.365918 Hz  
AQ 1.3664756 sec  
RG 512  
DW 20.850 usec  
DE 18.00 usec  
TE 298.2 K  
D1 2.00000000 sec  
D11 0.03000000 sec  
TD0 1

==== CHANNEL f1 =====  
NUC1 13C  
P1 9.25 usec  
PL1 0.55 dB  
PL1W 35.18820572 W  
SFO1 100.6228298 MHz

==== CHANNEL f2 =====  
CPDPRG2 waltz16  
NUC2 1H  
PCPD2 90.00 usec  
PL2 4.90 dB  
PL12 20.46 dB  
PL13 21.00 dB  
PL2W 3.30822015 W  
PL12W 0.09195905 W  
PL13W 0.08120718 W  
SFO2 400.1316005 MHz

F2 - Processing parameters  
SI 32768  
SF 100.6127547 MHz  
WDW EM  
SSB 0  
LB 1.00 Hz  
GB 0  
PC 1.40

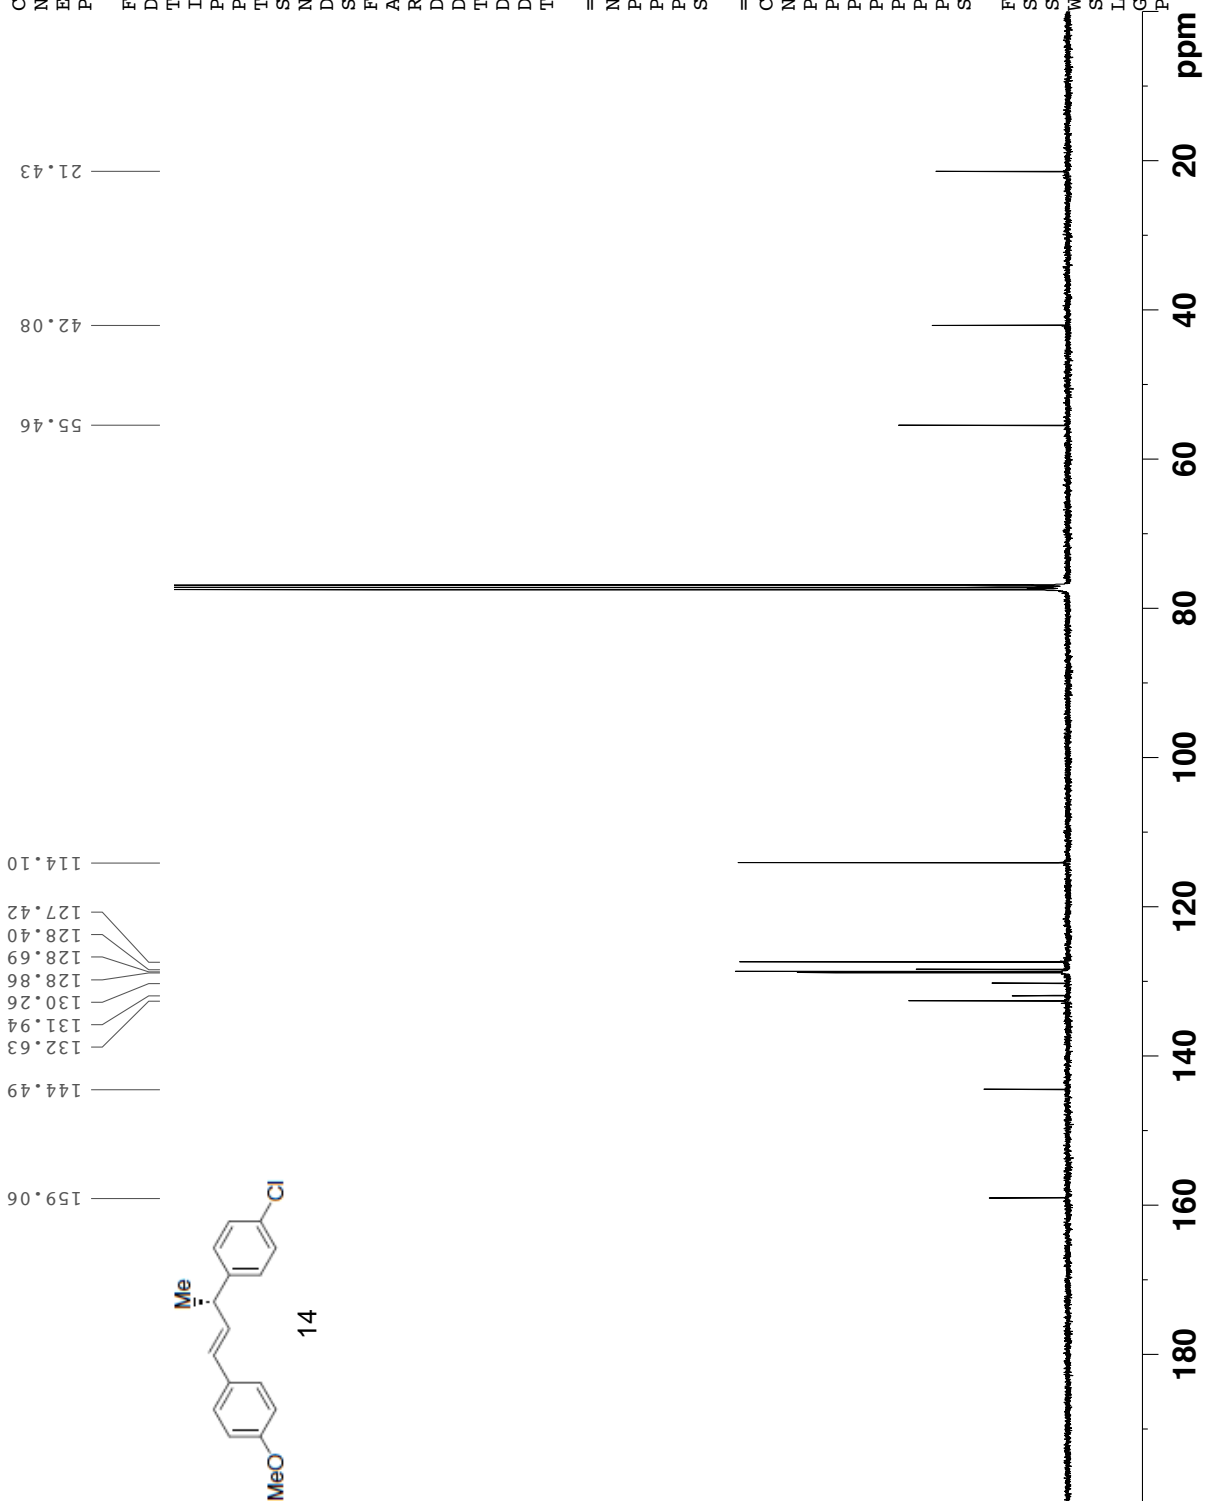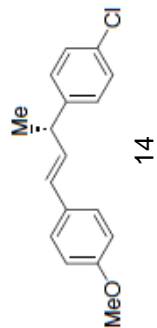

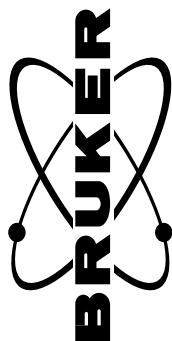

compound 15

Current Data Parameters  
NAME HH-4-252A  
EXPNO 1  
PROCNO 1

F2 - Acquisition Parameters  
Date\_ 20130502  
Time\_ 17:32  
INSTRUM spect  
PROBHD 5 mm CPQNP 1H/  
PULPROG zg30  
TD 65536  
SOLVENT CDC13  
NS 16  
DS 2  
SWH 8278.146 Hz  
FIDRES 0.126314 Hz  
AQ 3.9584243 sec  
RG 8  
DW 60.400 usec  
DE 6.00 usec  
TE 298.2 K  
D1 1.00000000 sec  
TD0 1

==== CHANNEL f1 =====  
NUC1 1H  
P1 15.00 usec  
PL1 4.90 dB  
PL1W 3.30822015 W  
SFO1 400.1324710 MHz

F2 - Processing parameters  
SI 32768  
SF 400.1300094 MHz  
WDW EM  
SSB 0  
LB 0.30 Hz  
GB 0  
PC 1.00

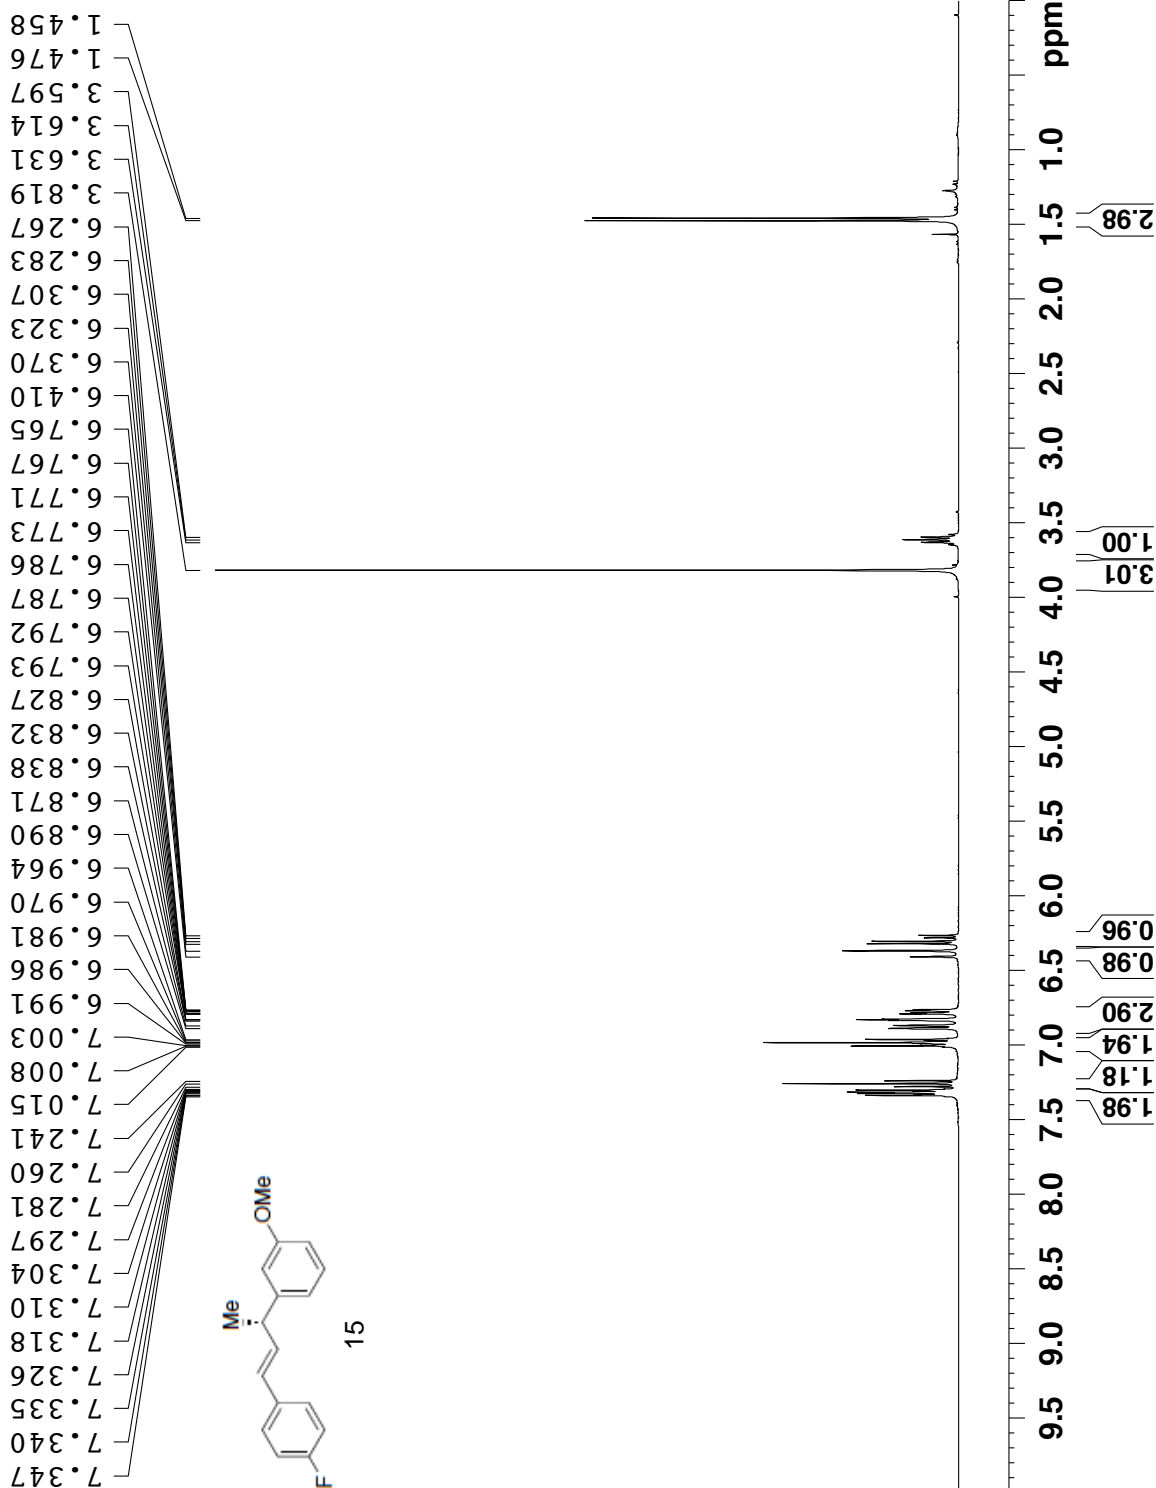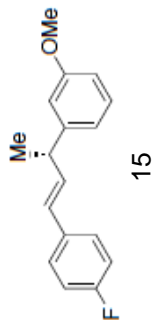





compound 15

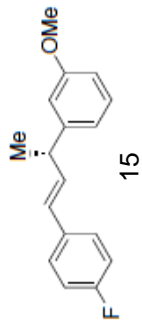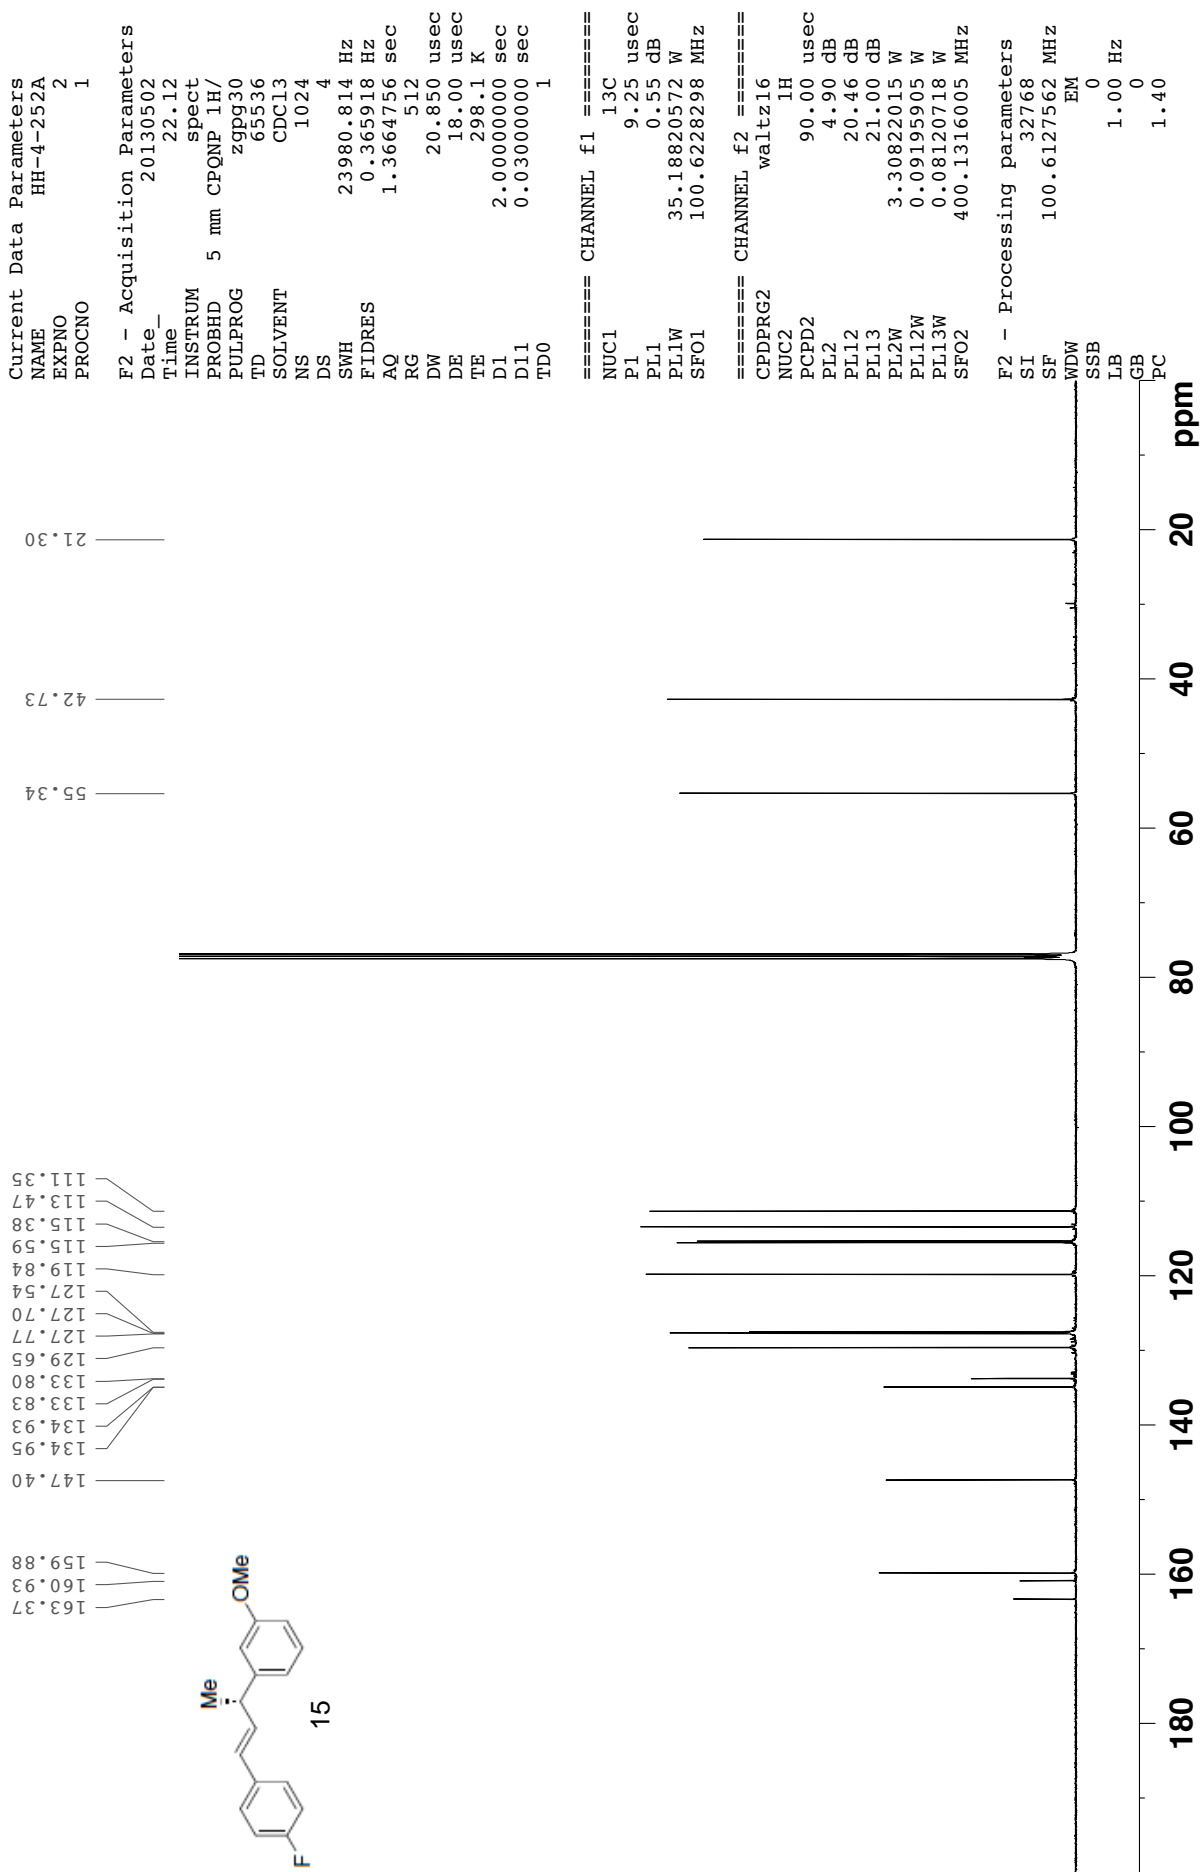

compound 16



Current Data Parameters  
NAME HH-4-246B  
EXPNO 1  
PROCNO 1

F2 - Acquisition Parameters  
Date\_ 20130504  
Time\_ 8.06  
INSTRUM spect  
PROBHD 5 mm CPQNP 1H/  
PULPROG zg30  
TD 65536  
SOLVENT CDCl3  
NS 16  
DS 2  
SWH 8278.146 Hz  
FIDRES 0.126314 Hz  
AQ 3.9584243 sec  
RG 4  
DW 60.400 usec  
DE 6.00 usec  
TE 298.2 K  
D1 1.00000000 sec  
TD0 1

==== CHANNEL f1 =====  
NUC1 1H  
P1 15.00 usec  
PL1 4.90 dB  
PL1W 3.30822015 W  
SFO1 400.1324710 MHz

F2 - Processing parameters  
SI 32768  
SF 400.1300098 MHz  
WDW EM  
SSB 0  
LB 0.30 Hz  
GB 0  
PC 1.00

1.479  
1.462

3.489  
3.633  
3.651  
3.668  
3.685  
3.702  
6.190  
6.207  
6.230  
6.247  
6.364  
6.404  
6.972  
6.977  
7.011  
7.022  
7.299  
7.304  
7.313  
7.321  
7.329  
7.334  
7.401  
7.420  
7.439  
7.496  
7.500  
7.504  
7.508  
7.511  
7.516  
7.520  
7.522

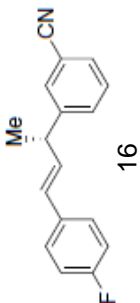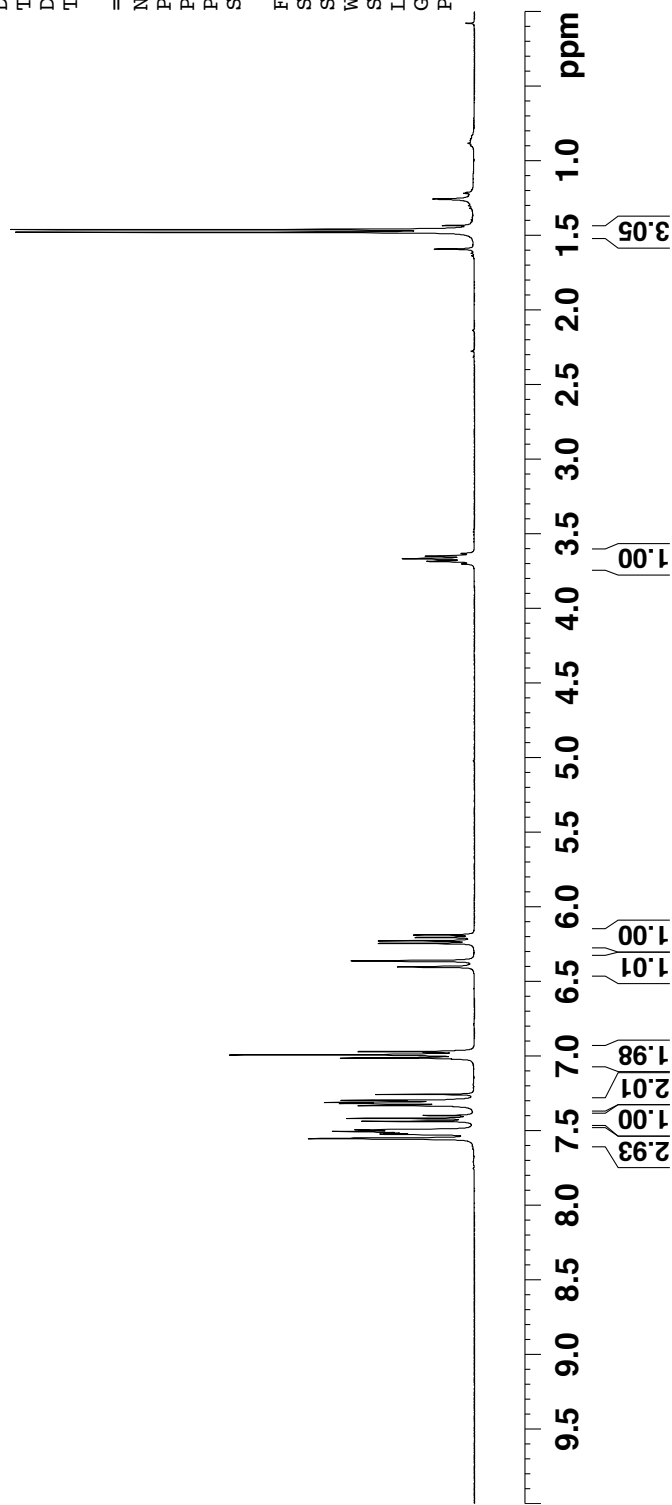



compound 16

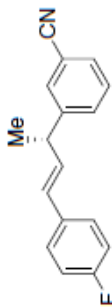

163.57  
161.12  
147.04  
133.39  
133.37  
133.26  
133.23  
133.14  
132.14  
131.09  
130.24  
129.47  
128.66  
127.88  
127.80  
119.18  
115.73  
115.52  
112.66

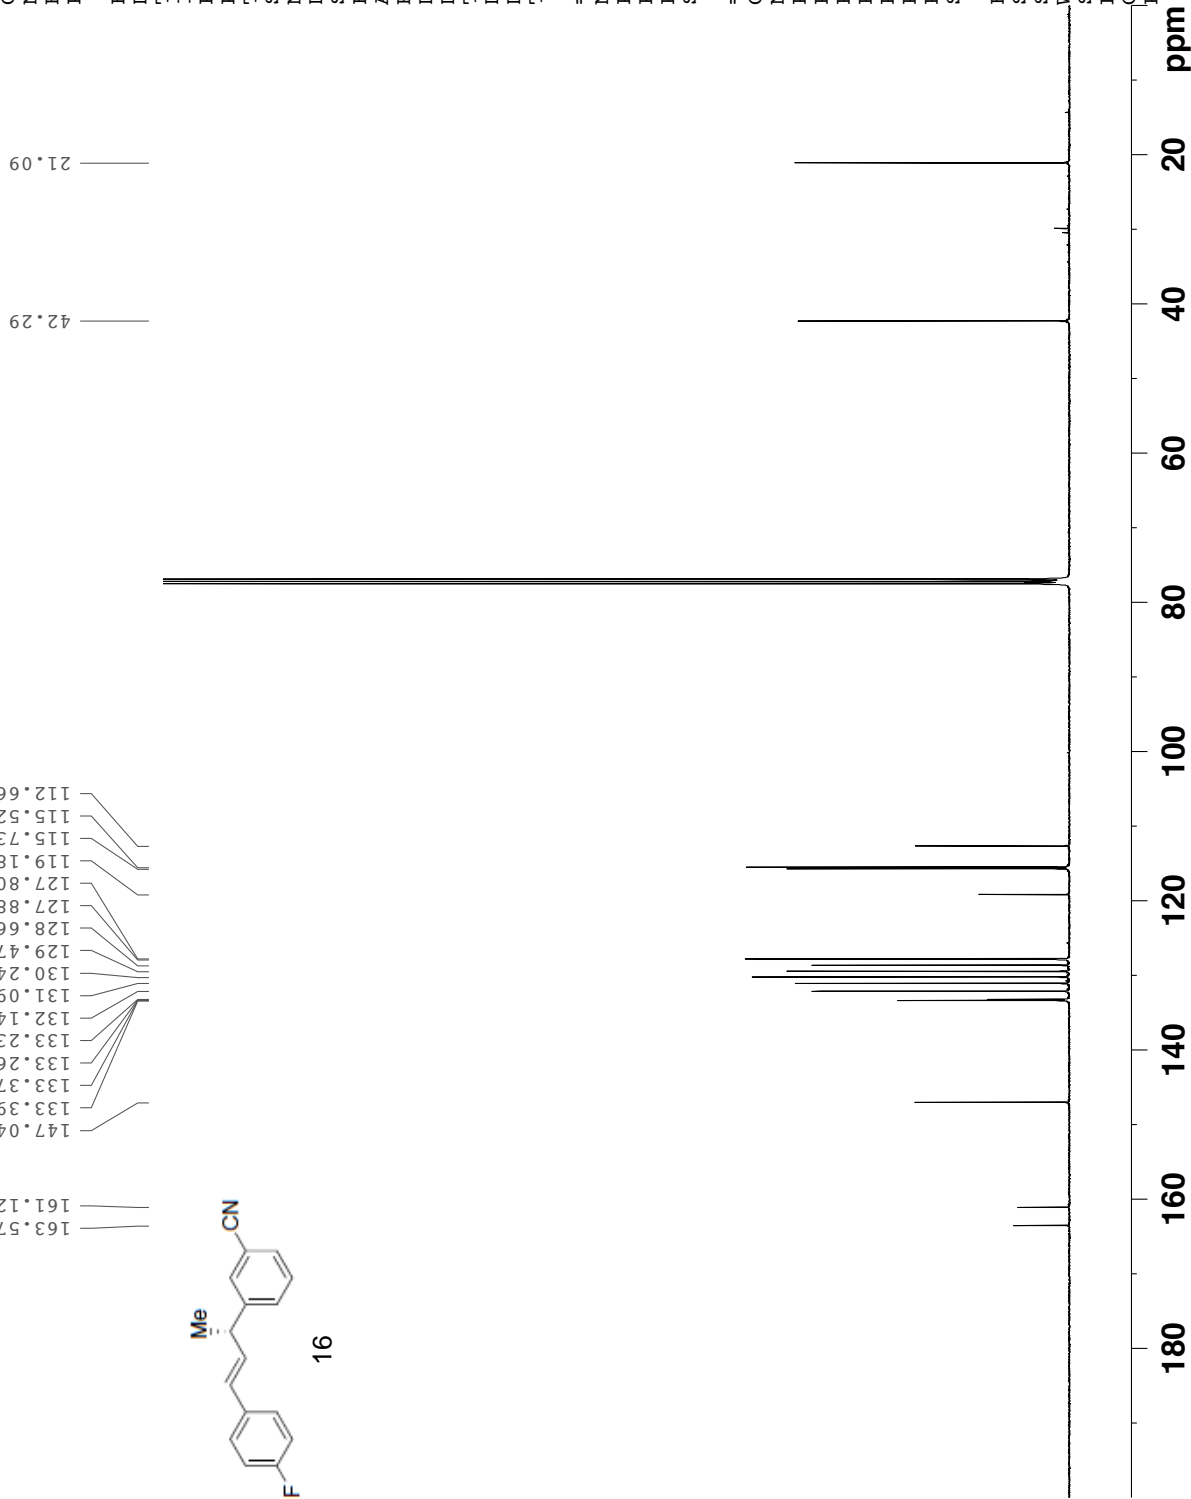

Current Data Parameters  
NAME HH-4-246B  
EXPNO 2  
PROCNO 1

F2 - Acquisition Parameters  
Date\_ 20130504  
Time\_ 21.03  
INSTRUM spect  
PROBHD 5 mm CPQNP 1H/  
PULPROG zgpg30  
TD 65536  
SOLVENT CDC13  
NS 1024  
DS 4  
SWH 23980.814 Hz  
FIDRES 0.365918 Hz  
AQ 1.3664756 sec  
RG 512  
DW 20.850 usec  
DE 18.00 usec  
TE 298.2 K  
D1 2.00000000 sec  
D11 0.03000000 sec  
TD0 1

==== CHANNEL f1 =====  
NUC1 13C  
P1 9.25 usec  
PL1 0.55 dB  
PL1W 35.18820572 W  
SFO1 100.6228298 MHz

==== CHANNEL f2 =====  
CPDPRG2 waltz16  
NUC2 1H  
PCPD2 90.00 usec  
PL2 4.90 dB  
PL12 20.46 dB  
PL13 21.00 dB  
PL2W 3.30822015 W  
PL12W 0.09195905 W  
PL13W 0.08120718 W  
SFO2 400.1316005 MHz

F2 - Processing parameters  
SI 32768  
SF 100.6127567 MHz  
WDW EM  
SSB 0  
LB 1.00 Hz  
GB 0  
PC 1.40



compound 17

Current Data Parameters  
NAME HH-4-257A  
EXPNO 1  
PROCNO 1

F2 - Acquisition Parameters  
Date\_ 20130513  
Time\_ 2.34  
INSTRUM spect  
PROBHD 5 mm CPQNP 1H/  
PULPROG zg30  
TD 65536  
SOLVENT CDCl3  
NS 16  
DS 2  
SWH 8278.146 Hz  
FIDRES 0.126314 Hz  
AQ 3.9584243 sec  
RG 11.3  
DW 60.400 usec  
DE 6.00 usec  
TE 298.1 K  
D1 1.00000000 sec  
TD0 1

==== CHANNEL f1 =====  
NUC1 1H  
P1 15.00 usec  
PL1 4.90 dB  
PL1W 3.30822015 W  
SFO1 400.1324710 MHz

F2 - Processing parameters  
SI 32768  
SF 400.1300105 MHz  
WDW EM  
SSB 0  
LB 0.30 Hz  
GB 0  
PC 1.00

1.448  
1.431

3.642  
3.625  
3.612  
3.607  
3.595  
3.577

7.304  
7.298  
7.293  
7.282  
7.277  
7.271  
7.260  
7.246  
7.239  
7.237  
7.201  
7.195  
7.179  
7.174  
6.364  
6.324  
6.322  
6.309  
6.269

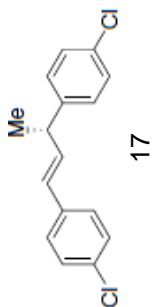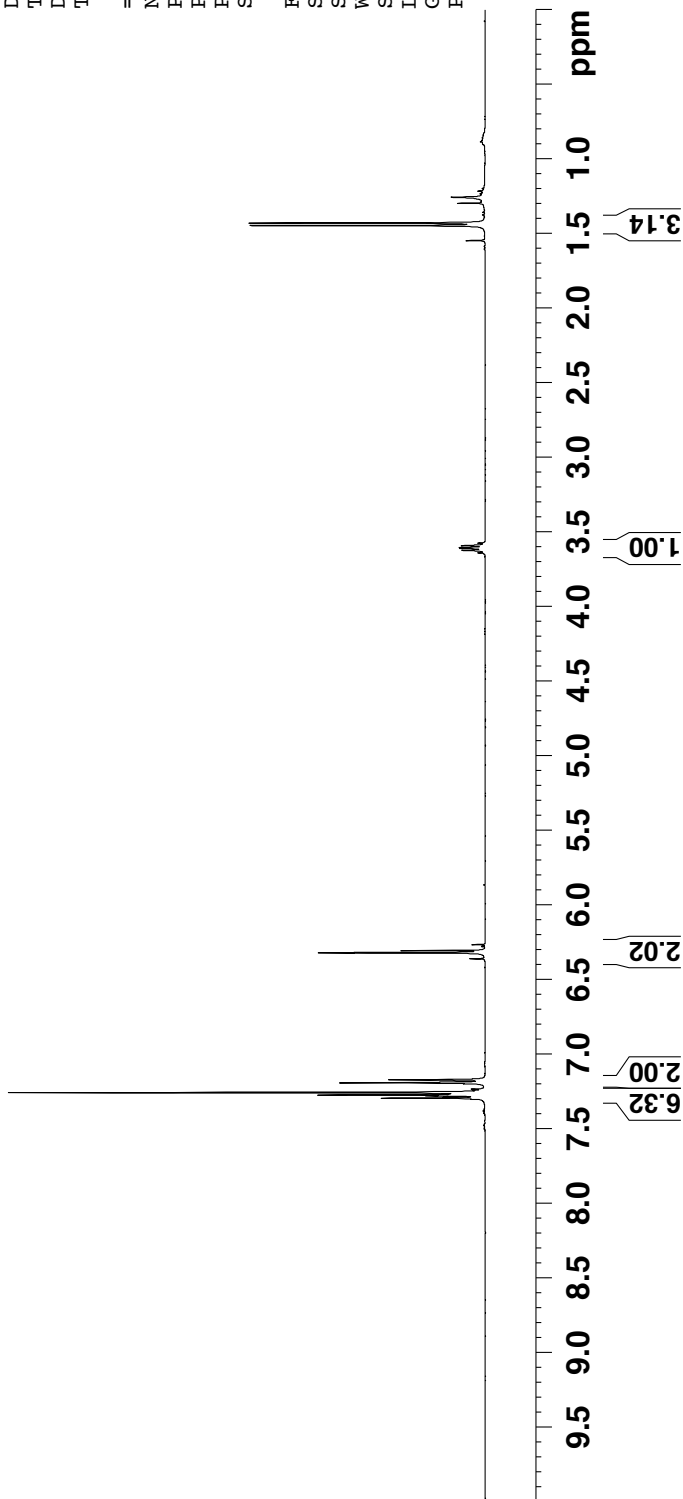

compound 17

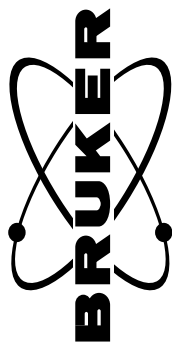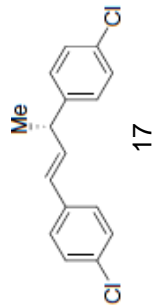

143.91  
135.97  
135.47  
132.92  
132.16  
128.84  
128.83  
128.80  
127.89  
127.53

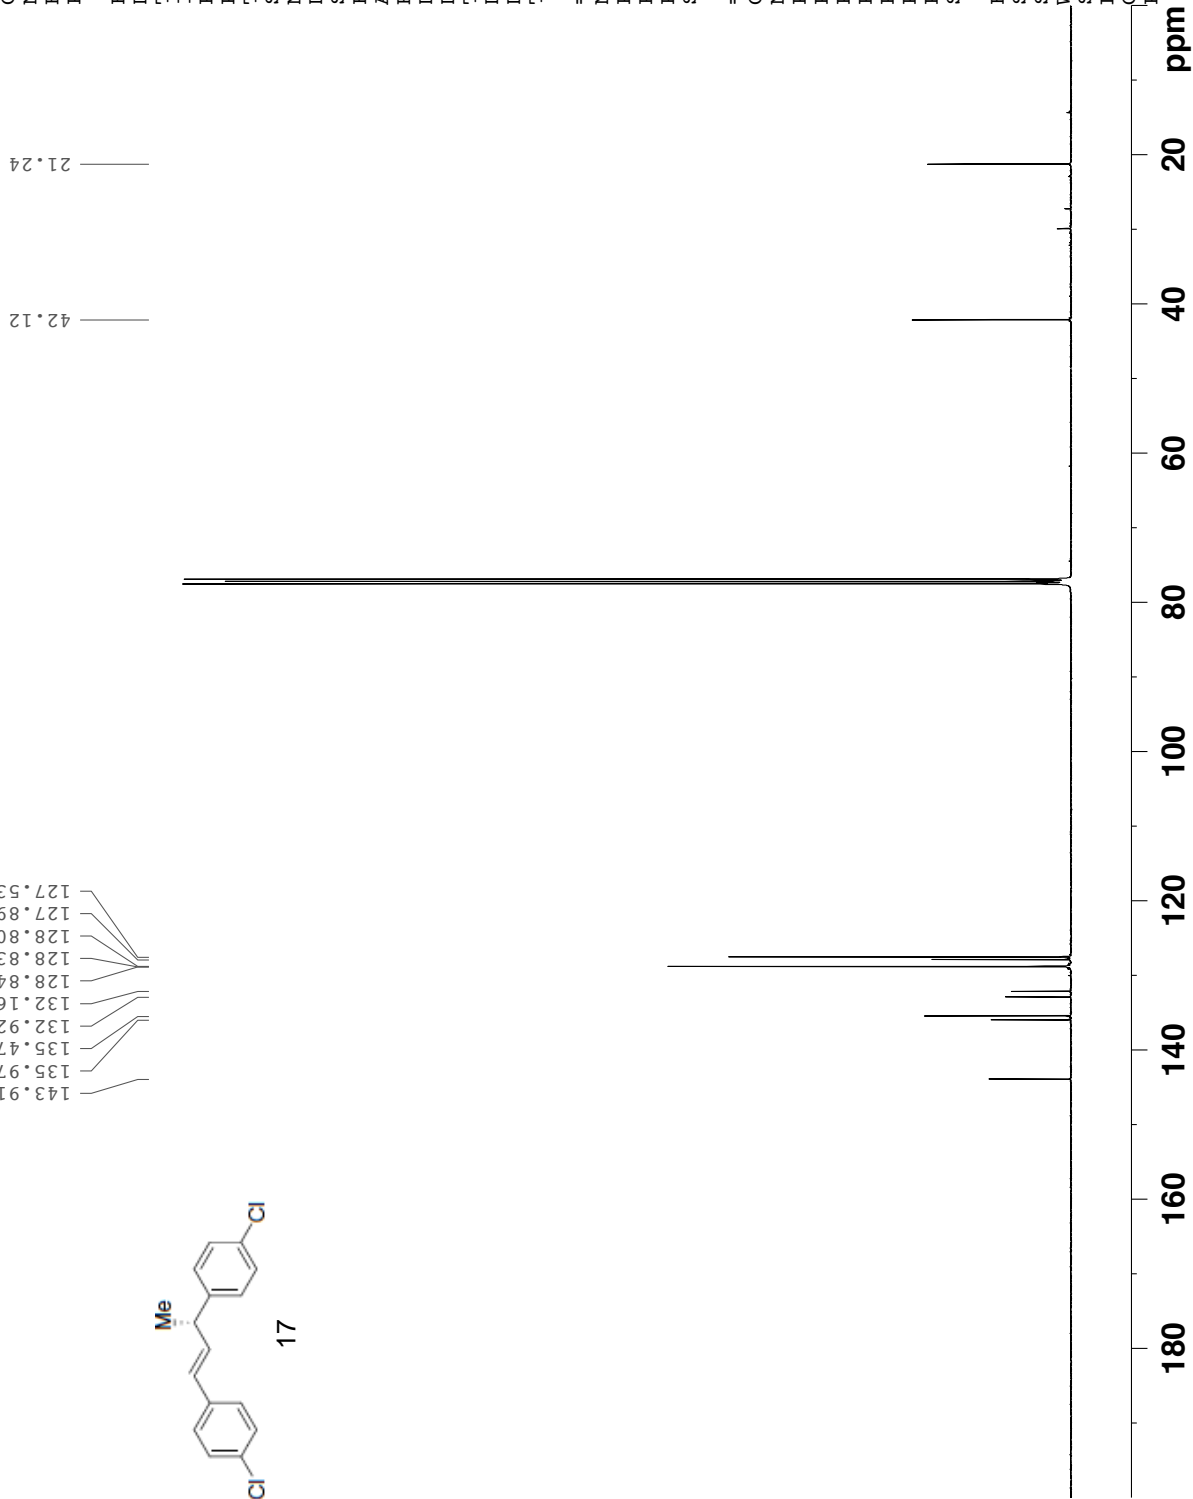

Current Data Parameters  
 NAME HH-4-257A  
 EXPNO 2  
 PROCNO 1

F2 - Acquisition Parameters  
 Date\_ 20130513  
 Time 3.34  
 INSTRUM spect  
 PROBHD 5 mm CPQNP 1H/  
 PULPROG zgpg30  
 TD 65536  
 SOLVENT CDCl3  
 NS 1024  
 DS 4  
 SWH 23980.814 Hz  
 FIDRES 0.365918 Hz  
 AQ 1.3664756 sec  
 RG 512  
 DW 20.850 usec  
 DE 18.00 usec  
 TE 298.1 K  
 D1 2.00000000 sec  
 D11 0.03000000 sec  
 TDO 1

==== CHANNEL f1 =====  
 NUC1 13C  
 P1 9.25 usec  
 PL1 0.55 dB  
 PL1W 35.18820572 W  
 SFO1 100.6228298 MHz

==== CHANNEL f2 =====  
 CPDPRG2 waltz16  
 NUC2 1H  
 PCPD2 90.00 usec  
 PL2 4.90 dB  
 PL12 20.46 dB  
 PL13 21.00 dB  
 PL2W 3.30822015 W  
 PL12W 0.09195905 W  
 PL13W 0.08120718 W  
 SFO2 400.1316005 MHz

F2 - Processing parameters  
 SI 32768  
 SF 100.6127538 MHz  
 EM  
 WDW 0  
 SSB 1.00 Hz  
 LB 0  
 GB 0  
 PC 1.40



compound 18

Current Data Parameters  
NAME HH-4-276A  
EXPNO 1  
PROCNO 1

F2 - Acquisition Parameters  
Date\_ 20130531  
Time\_ 7.45  
INSTRUM spect  
PROBHD 5 mm CPQNP 1H/  
PULPROG zg30  
TD 65536  
SOLVENT CDCl3  
NS 16  
DS 2  
SWH 8278.146 Hz  
FIDRES 0.126314 Hz  
AQ 3.9584243 sec  
RG 10.1  
DW 60.400 usec  
DE 6.00 usec  
TE 298.2 K  
D1 1.00000000 sec  
TD0 1

==== CHANNEL f1 =====  
NUC1 1H  
P1 15.00 usec  
PL1 4.90 dB  
PL1W 3.30822015 W  
SFO1 400.1324710 MHz

F2 - Processing parameters  
SI 32768  
SF 400.1300095 MHz  
WDW EM  
SSB 0  
LB 0.30 Hz  
GB 0  
PC 1.00

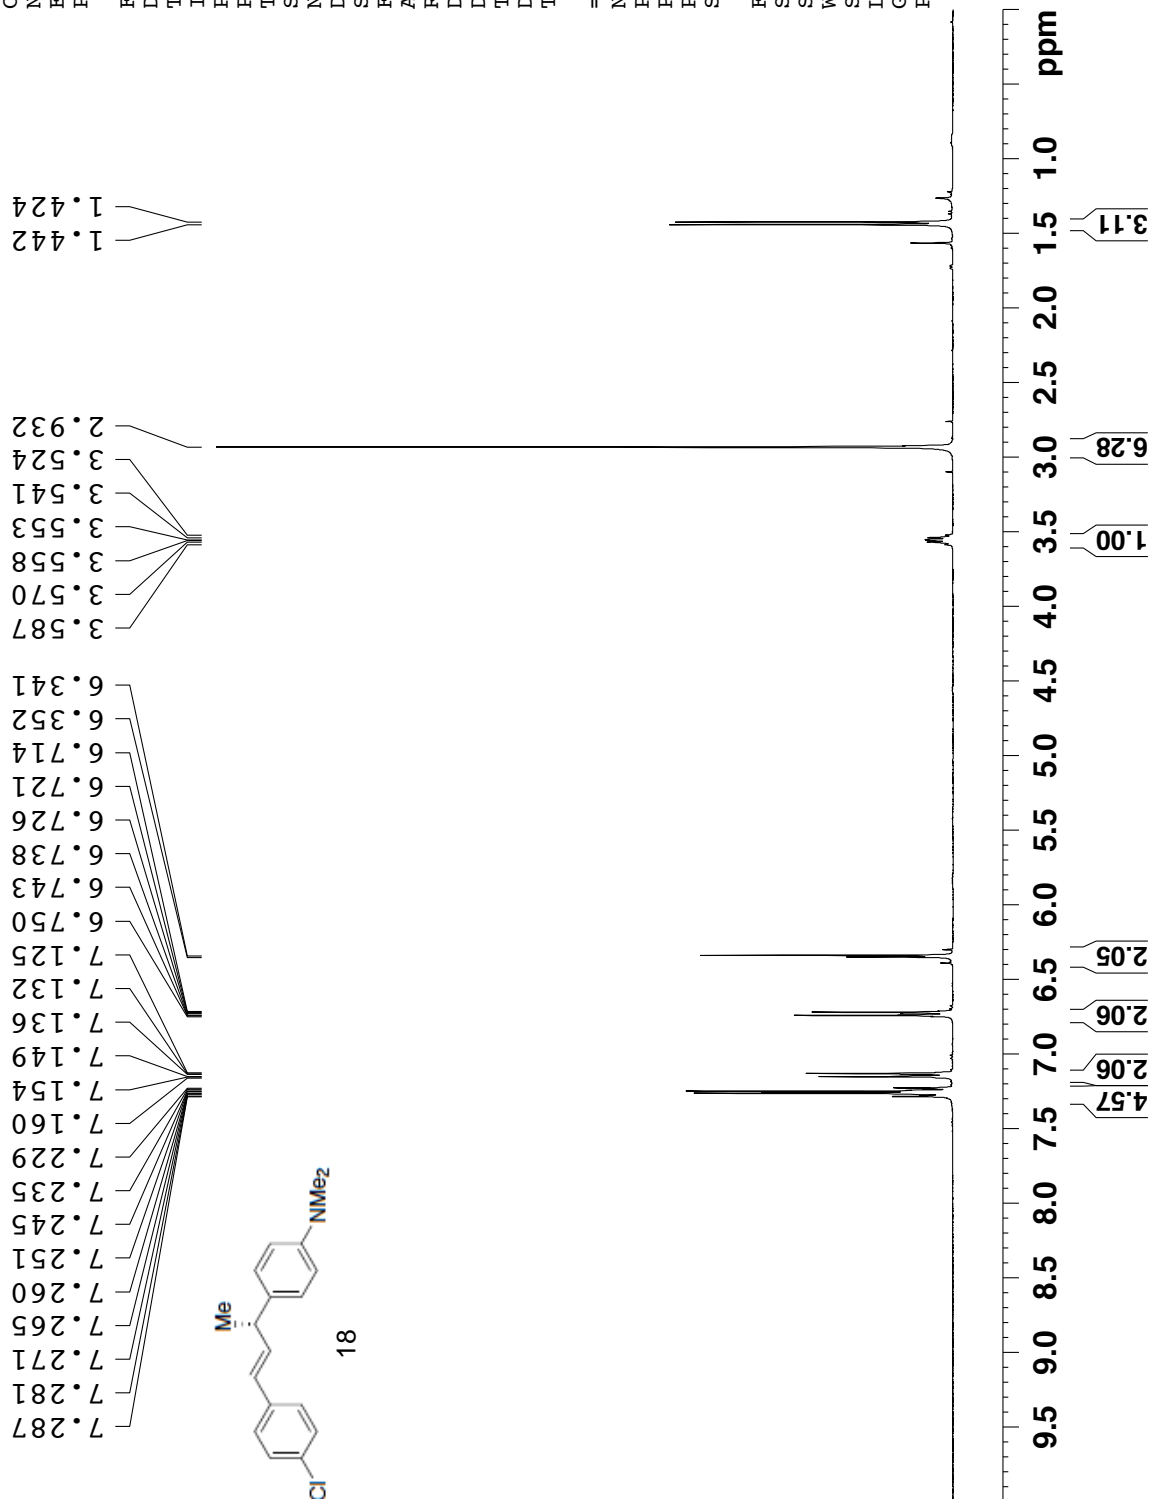

compound 18

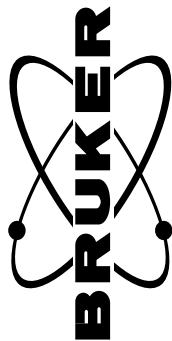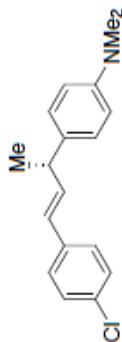

18

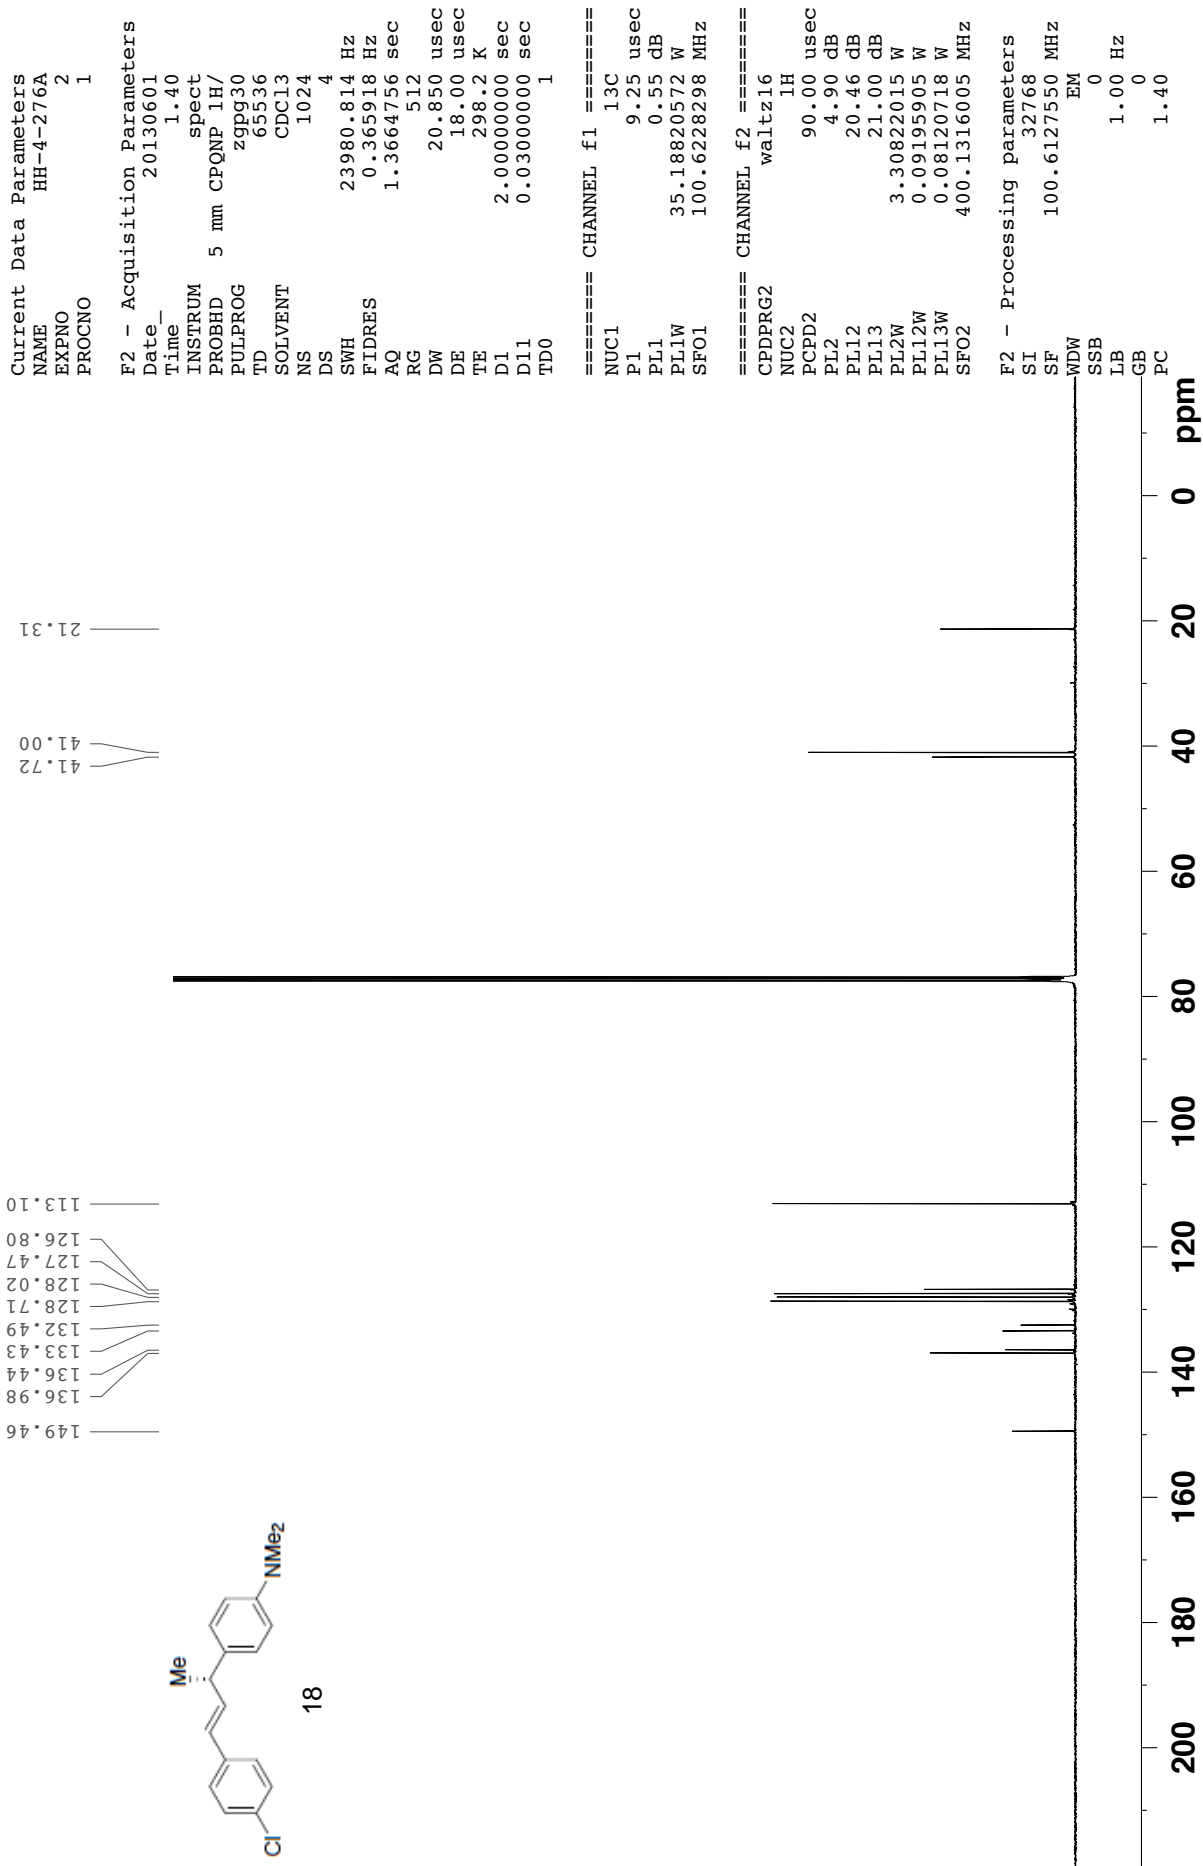

compound 19



Current Data Parameters  
NAME HH-4-256B  
EXPNO 1  
PROCNO 1

F2 - Acquisition Parameters  
Date\_ 20130513  
Time\_ 1.28  
INSTRUM spect  
PROBHD 5 mm CPQNP 1H/  
PULPROG zg30  
TD 65536  
SOLVENT CDCl3  
NS 16  
DS 2  
SWH 8278.146 Hz  
FIDRES 0.126314 Hz  
AQ 3.9584243 sec  
RG 11.3  
DW 60.400 usec  
DE 6.00 usec  
TE 298.2 K  
D1 1.00000000 sec  
TD0 1

==== CHANNEL f1 =====  
NUC1 1H  
P1 15.00 usec  
PL1 4.90 dB  
PL1W 3.30822015 W  
SFO1 400.1324710 MHz

F2 - Processing parameters  
SI 32768  
SF 400.1300093 MHz  
WDW EM  
SSB 0  
LB 0.30 Hz  
GB 0  
PC 1.00

1.481  
1.464

3.707  
3.690  
3.673  
3.656  
3.639

6.251  
6.268  
6.291  
6.307  
6.352  
6.354  
6.392  
6.393  
7.260  
7.273

7.403  
7.423  
7.442  
7.491  
7.495  
7.508  
7.511  
7.515  
7.526  
7.530  
7.534  
7.547  
7.551

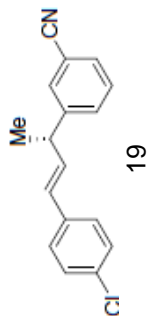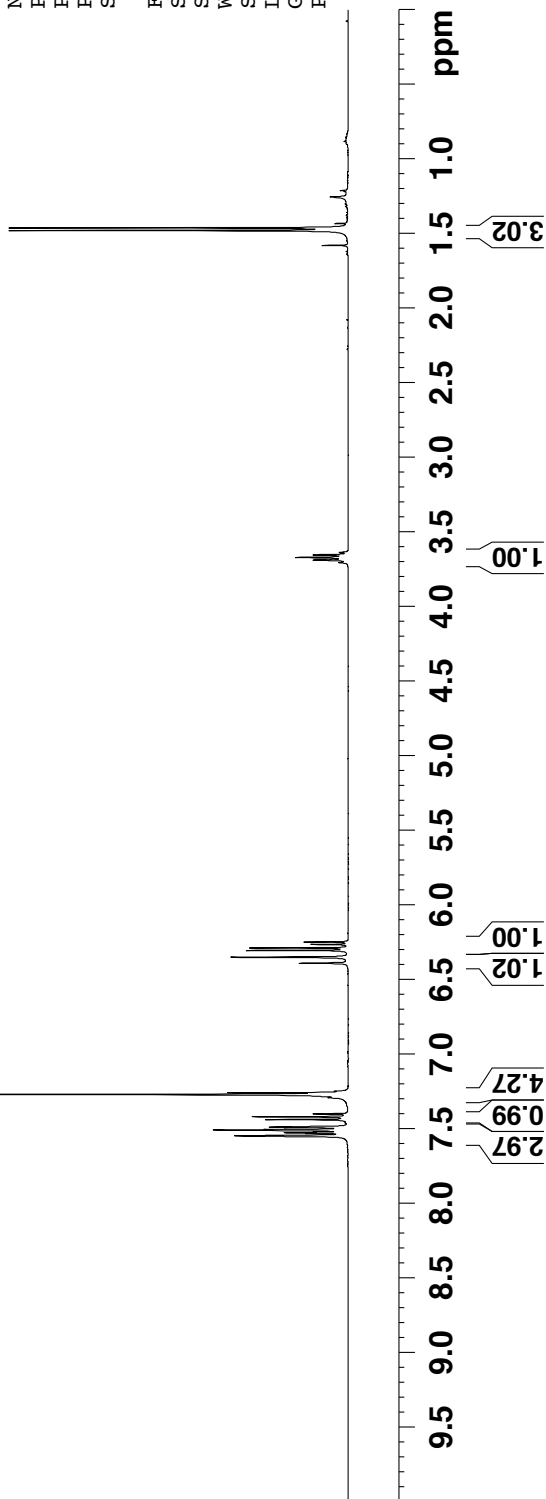



compound 19

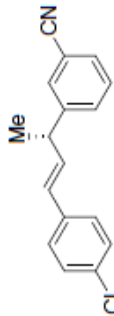

19

146.87  
135.60  
134.33  
133.19  
132.15  
131.10  
130.30  
129.51  
128.87  
128.67  
127.58  
119.16  
112.70

42.33  
21.03

Current Data Parameters  
 NAME HH-4-256B  
 EXPNO 2  
 PROCNO 1  
 F2 - Acquisition Parameters  
 Date\_ 20130513  
 Time\_ 2.28  
 INSTRUM spect  
 PROBHD 5 mm CPQNP 1H/  
 PULPROG zgpg30  
 TD 65536  
 SOLVENT CDCl3  
 NS 1024  
 DS 4  
 SWH 23980.814 Hz  
 FIDRES 0.365918 Hz  
 AQ 1.3664756 sec  
 RG 512  
 DW 20.850 usec  
 DE 18.00 usec  
 TE 298.2 K  
 D1 2.00000000 sec  
 D11 0.03000000 sec  
 TDO 1

==== CHANNEL f1 =====  
 NUC1 13C  
 P1 9.25 usec  
 PL1 0.55 dB  
 PL1W 35.18820572 W  
 SFO1 100.6228298 MHz

==== CHANNEL f2 =====  
 CPDPRG2 waltz16  
 NUC2 1H  
 PCPD2 90.00 usec  
 PL2 4.90 dB  
 PL12 20.46 dB  
 PL13 21.00 dB  
 PL2W 3.30822015 W  
 PL12W 0.09195905 W  
 PL13W 0.08120718 W  
 SFO2 400.1316005 MHz

F2 - Processing parameters  
 SI 32768  
 SF 100.6127558 MHz  
 EM  
 WDW 0  
 SSB 1.00 Hz  
 LB 0  
 GB 1.40  
 PC

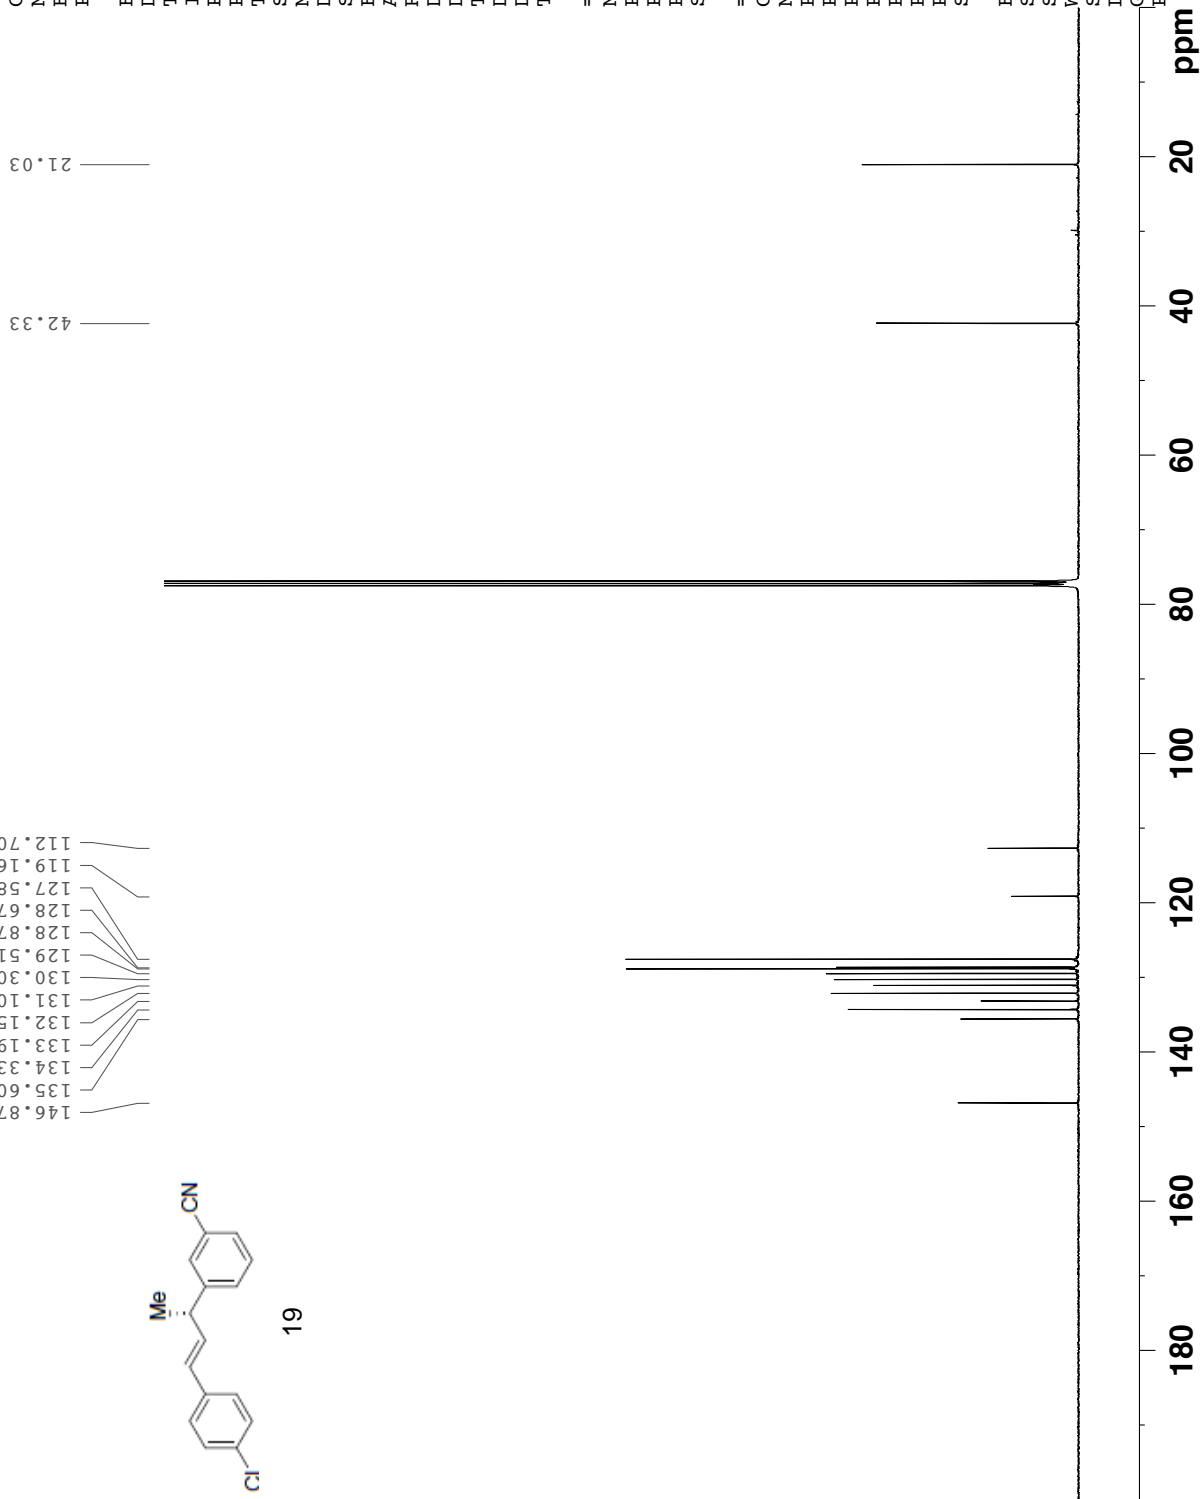



compound 20

Current Data Parameters  
NAME HH-4-263A  
EXPNO 1  
PROCNO 1

F2 - Acquisition Parameters  
Date\_ 20130518  
Time\_ 1.11  
INSTRUM spect  
PROBHD 5 mm CPQNP 1H/  
PULPROG zg30  
TD 65536  
SOLVENT CDCl3  
NS 16  
DS 2  
SWH 8278.146 Hz  
FIDRES 0.126314 Hz  
AQ 3.9584243 sec  
RG 6.3  
DW 60.400 usec  
DE 6.00 usec  
TE 298.2 K  
D1 1.00000000 sec  
TD0 1

==== CHANNEL f1 =====  
NUC1 1H  
P1 15.00 usec  
PL1 4.90 dB  
PL1W 3.30822015 W  
SFO1 400.1324710 MHz

F2 - Processing parameters  
SI 32768  
SF 400.1300093 MHz  
WDW EM  
SSB 0  
LB 0.30 Hz  
GB 0  
PC 1.00

1.482  
1.499

3.646  
3.663  
3.697  
3.714

6.392  
6.432  
6.509  
6.526  
6.549  
6.565  
7.227  
7.230  
7.245  
7.254  
7.261  
7.265  
7.326  
7.331  
7.345  
7.364  
7.412  
7.465  
7.486  
7.579  
7.603  
7.609

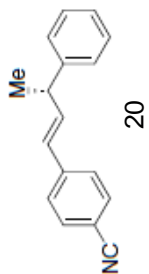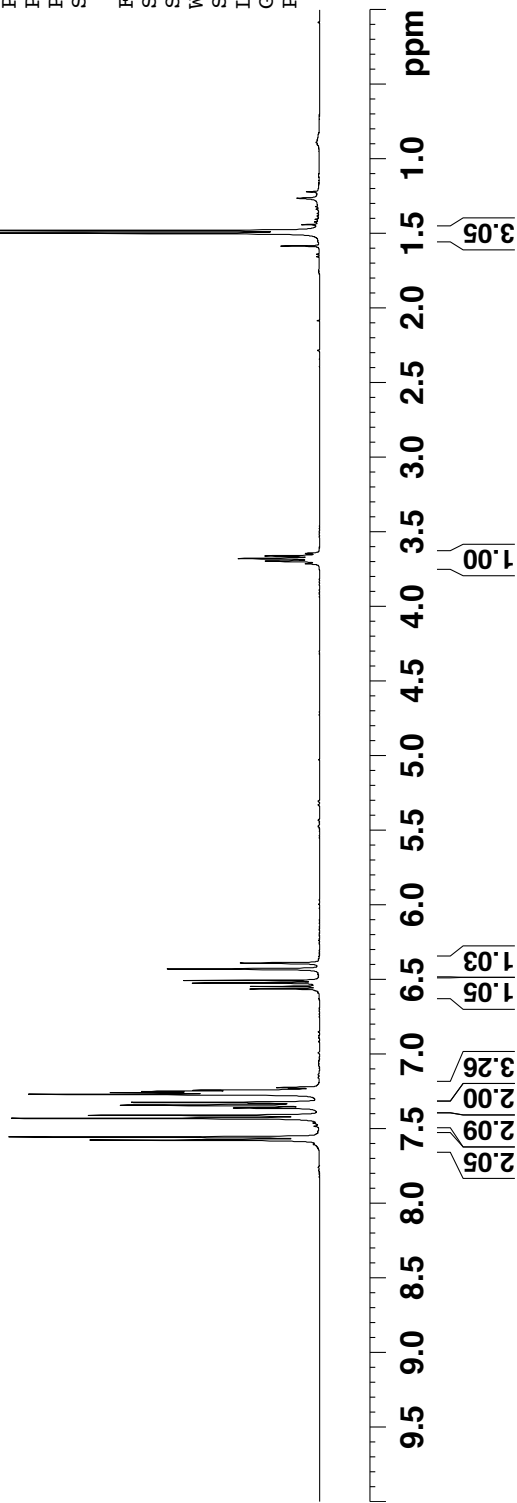



compound 20

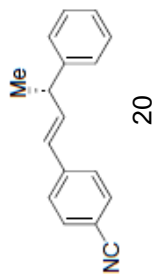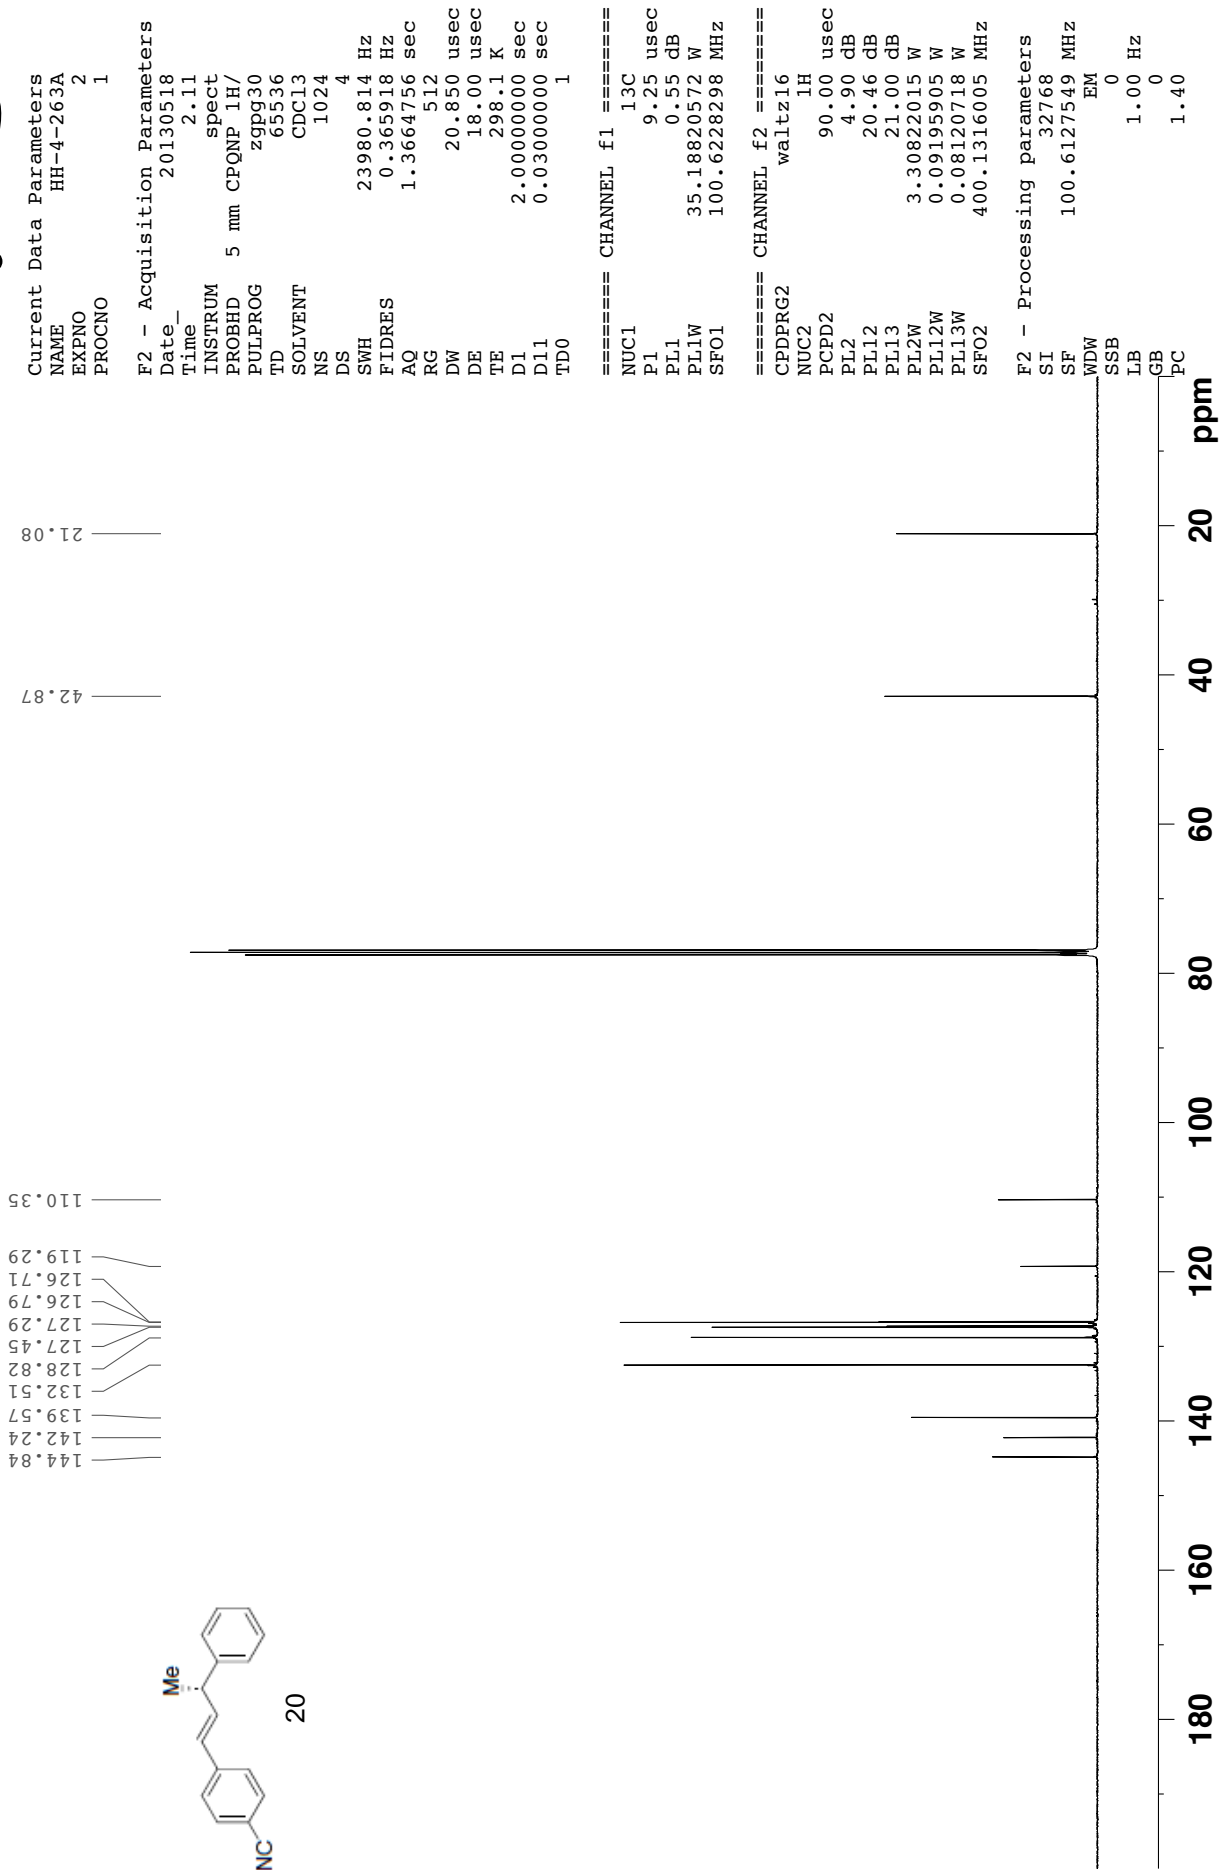



compound 21

7.782  
7.768  
7.710  
7.678  
7.657  
7.632  
7.602  
7.588  
7.585  
7.563  
7.557  
7.538  
7.521  
7.479  
7.464  
7.451  
7.432  
7.413  
6.607  
6.567  
6.466  
6.449  
6.427  
6.410  
6.364  
3.772  
3.755  
3.720  
3.703

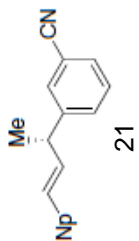

Current Data Parameters  
 NAME HH-4-245A  
 EXPNO 1  
 PROCNO 1

F2 - Acquisition Parameters  
 Date\_ 20130425  
 Time\_ 7.04  
 INSTRUM spect  
 PROBHD 5 mm CPQNP 1H/  
 PULPROG zg30  
 TD 65536  
 SOLVENT CDCl3  
 NS 16  
 DS 2  
 SWH 8278.146 Hz  
 FIDRES 0.126314 Hz  
 AQ 3.9584243 sec  
 RG 10.1  
 DW 60.400 usec  
 DE 6.00 usec  
 TE 298.1 K  
 D1 1.00000000 sec  
 TD0 1

==== CHANNEL f1 =====  
 NUC1 1H  
 P1 15.00 usec  
 PL1 4.90 dB  
 PL1W 3.30822015 W  
 SFO1 400.1324710 MHz

F2 - Processing parameters  
 SI 32768  
 SF 400.1300101 MHz  
 WDW EM  
 SSB 0  
 LB 0.30 Hz  
 GB 0  
 PC 1.00

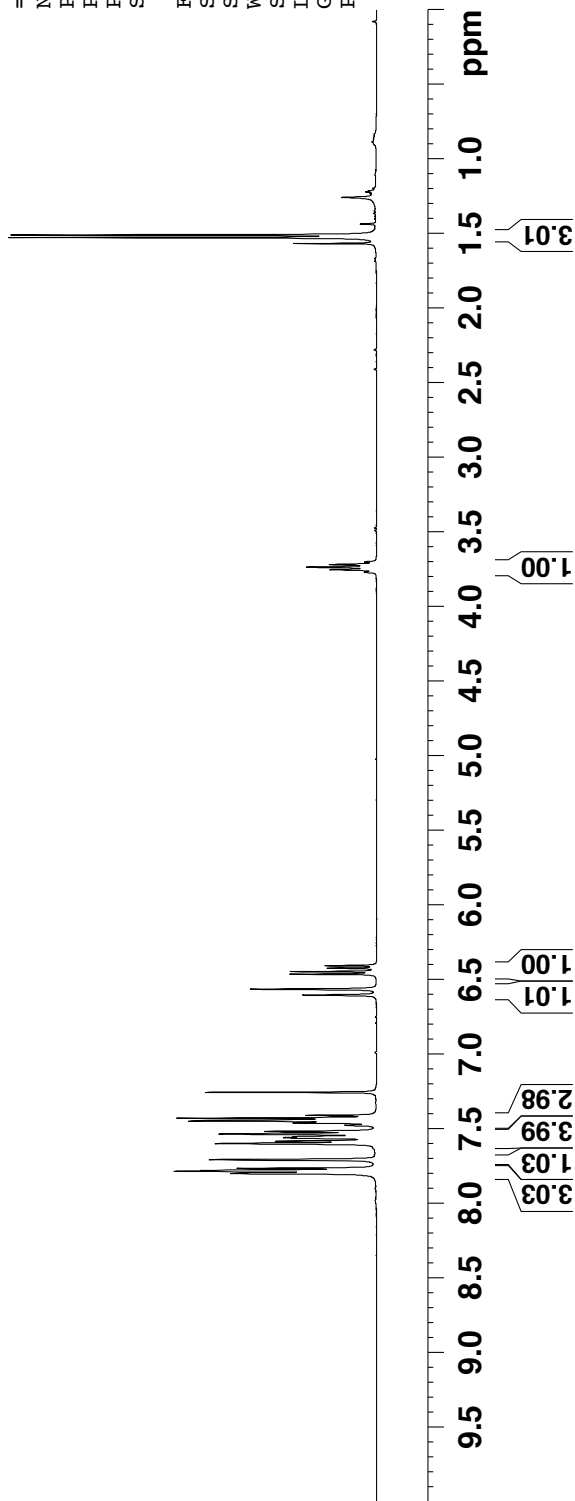



compound 21

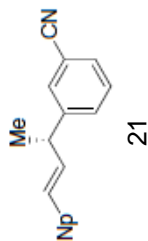

147.15  
134.56  
134.06  
133.75  
133.05  
132.24  
131.17  
130.27  
129.97  
129.50  
128.40  
128.06  
127.83  
126.47  
126.24  
125.98  
123.58  
112.68

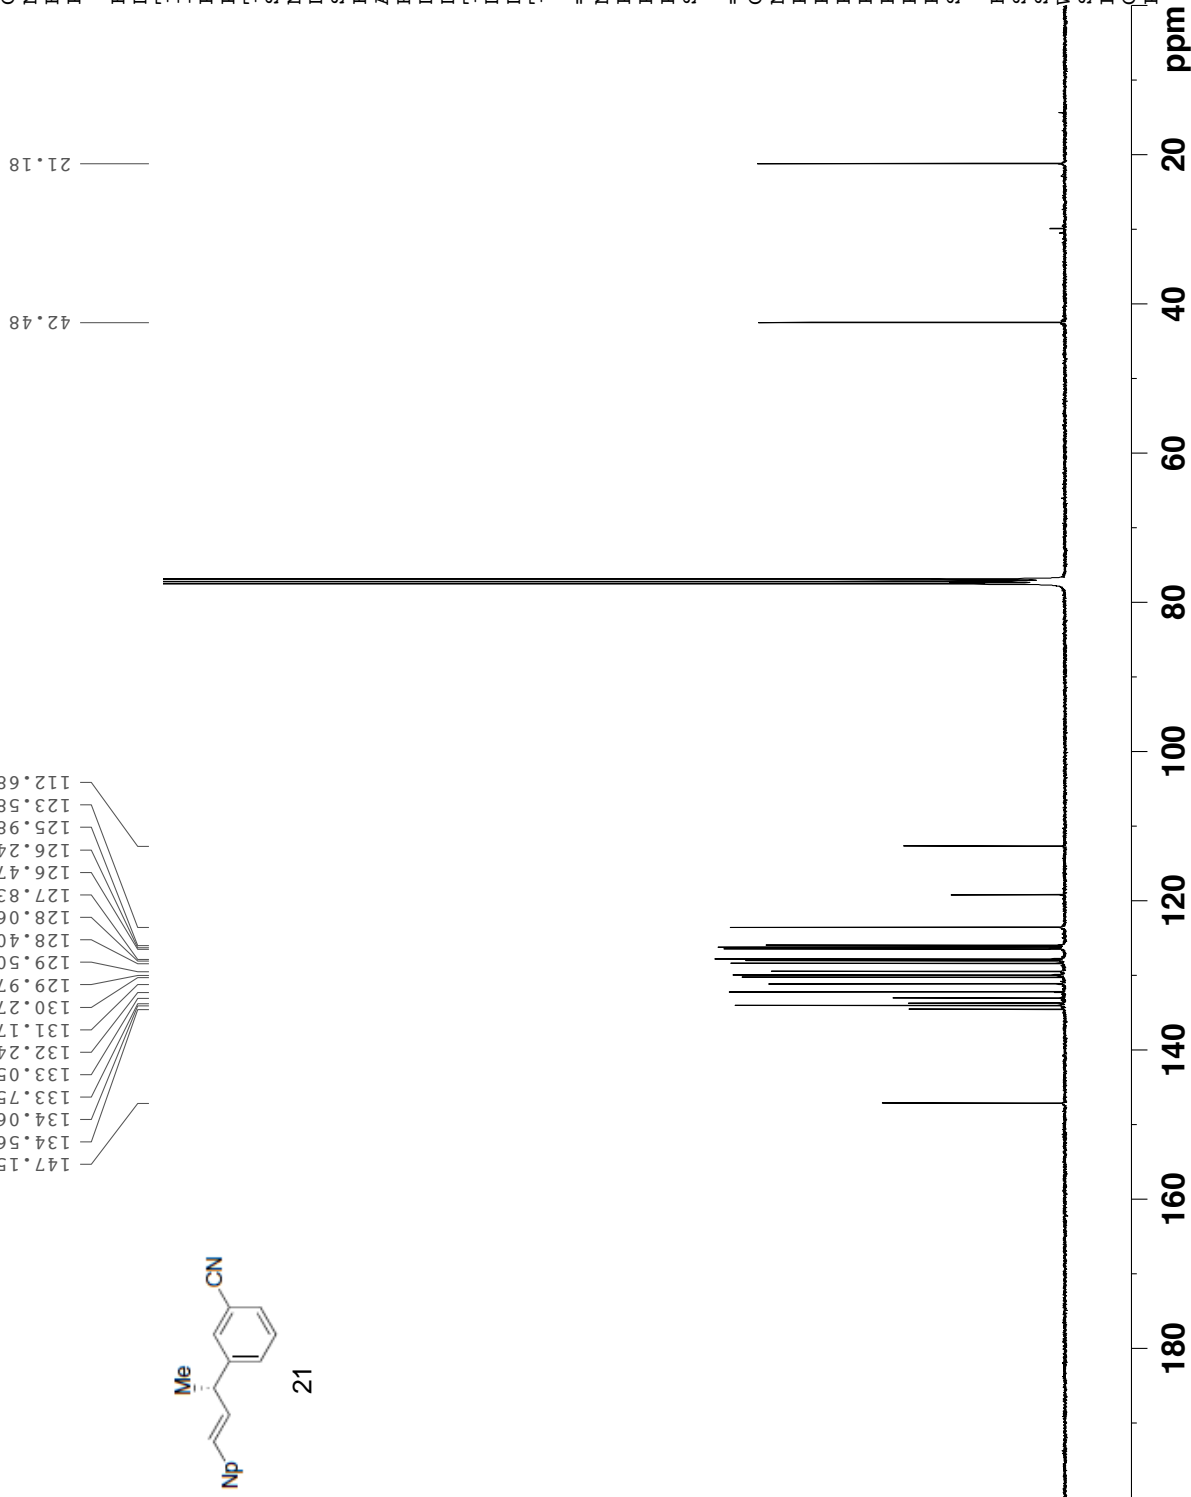

Current Data Parameters  
NAME HH-4-245A  
EXPNO 2  
PROCNO 1

F2 - Acquisition Parameters  
Date\_ 20130425  
Time 21.08  
INSTRUM spect  
PROBHD 5 mm CPQNP 1H/  
PULPROG zgpg30  
TD 65536  
SOLVENT CDC13  
NS 1024  
DS 4  
SWH 23980.814 Hz  
FIDRES 0.365918 Hz  
AQ 1.3664756 sec  
RG 512  
DW 20.850 usec  
DE 18.00 usec  
TE 298.1 K  
D1 2.00000000 sec  
D11 0.03000000 sec  
TD0 1

==== CHANNEL f1 =====  
NUC1 13C  
P1 9.25 usec  
PL1 0.55 dB  
PL1W 35.18820572 W  
SFO1 100.6228298 MHz

==== CHANNEL f2 =====  
CPDPRG2 waltz16  
NUC2 1H  
PCPD2 90.00 usec  
PL2 4.90 dB  
PL12 20.46 dB  
PL13 21.00 dB  
PL2W 3.30822015 W  
PL12W 0.09195905 W  
PL13W 0.08120718 W  
SFO2 400.1316005 MHz

F2 - Processing parameters  
SI 32768  
SF 100.6127549 MHz  
WDW EM  
SSB 0  
LB 1.00 Hz  
GB 0  
PC 1.40



compound 22

Current Data Parameters  
NAME QZ-4-038-PURE  
EXPNO 1  
PROCNO 1

F2 - Acquisition Parameters  
Date\_ 20130629  
Time\_ 13.01  
INSTRUM spect  
PROBHD 5 mm PABBO BB/  
PULPROG zg30  
TD 65536  
SOLVENT CDCl3  
NS 8  
DS 2  
SWH 8403.361 Hz  
FIDRES 0.128225 Hz  
AQ 3.8994420 sec  
RG 228  
DW 59.500 usec  
DE 17.39 usec  
TE 298.0 K  
D1 1.00000000 sec  
TD0 1

==== CHANNEL f1 =====  
SFO1 600.3233018 MHz  
NUC1 1H  
P1 10.77 usec

F2 - Processing parameters  
SI 65536  
SF 600.3200163 MHz  
WDW EM  
SSB 0  
LB 0.30 Hz  
GB 0  
PC 1.00

7.306  
7.304  
7.287  
7.283  
7.280  
7.272  
7.269  
7.264  
7.184  
7.170  
6.347  
6.344  
6.342  
6.339  
6.318  
6.307  
6.301  
6.291  
6.280  
6.187  
6.185  
6.164  
3.604  
3.593  
3.582  
3.570  
3.559  
1.424  
1.412

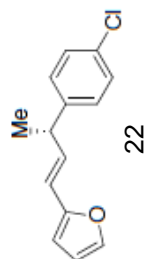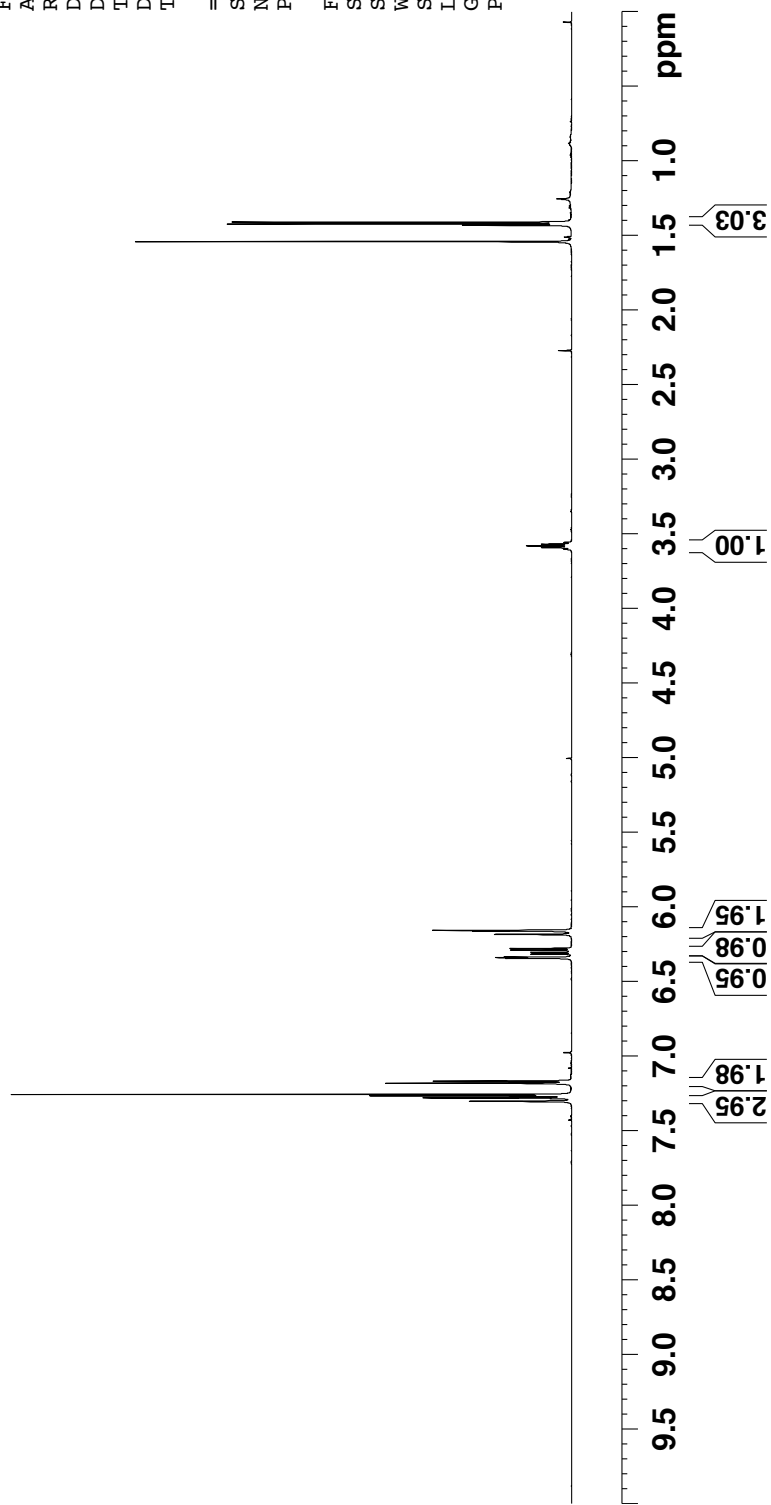

compound 22

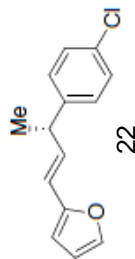

Current Data Parameters  
NAME QZ-4-038  
EXPNO 2  
PROCNO 1

F2 - Acquisition Parameters  
Date\_ 20130628  
Time\_ 16.10  
INSTRUM spect  
PROBHD 5 mm PABBO BB/  
PULPROG zgpg55  
TD 65536  
SOLVENT CDCl3  
NS 256  
DS 4  
SWH 34722.223 Hz  
FIDRES 0.529819 Hz  
AQ 0.9437684 sec  
RG 2050  
DW 14.400 usec  
DE 19.34 usec  
TE 298.0 K  
D1 1.10000002 sec  
D11 0.03000000 sec  
TD0 1

==== CHANNEL f1 =====  
SFO1 150.9656784 MHz  
NUC1 13C  
P1 10.63 usec

F2 - Processing parameters  
SI 32768  
SF 150.9505603 MHz  
WDW EM  
SSB 0  
LB 1.00 Hz  
GB 0  
PC 1.40

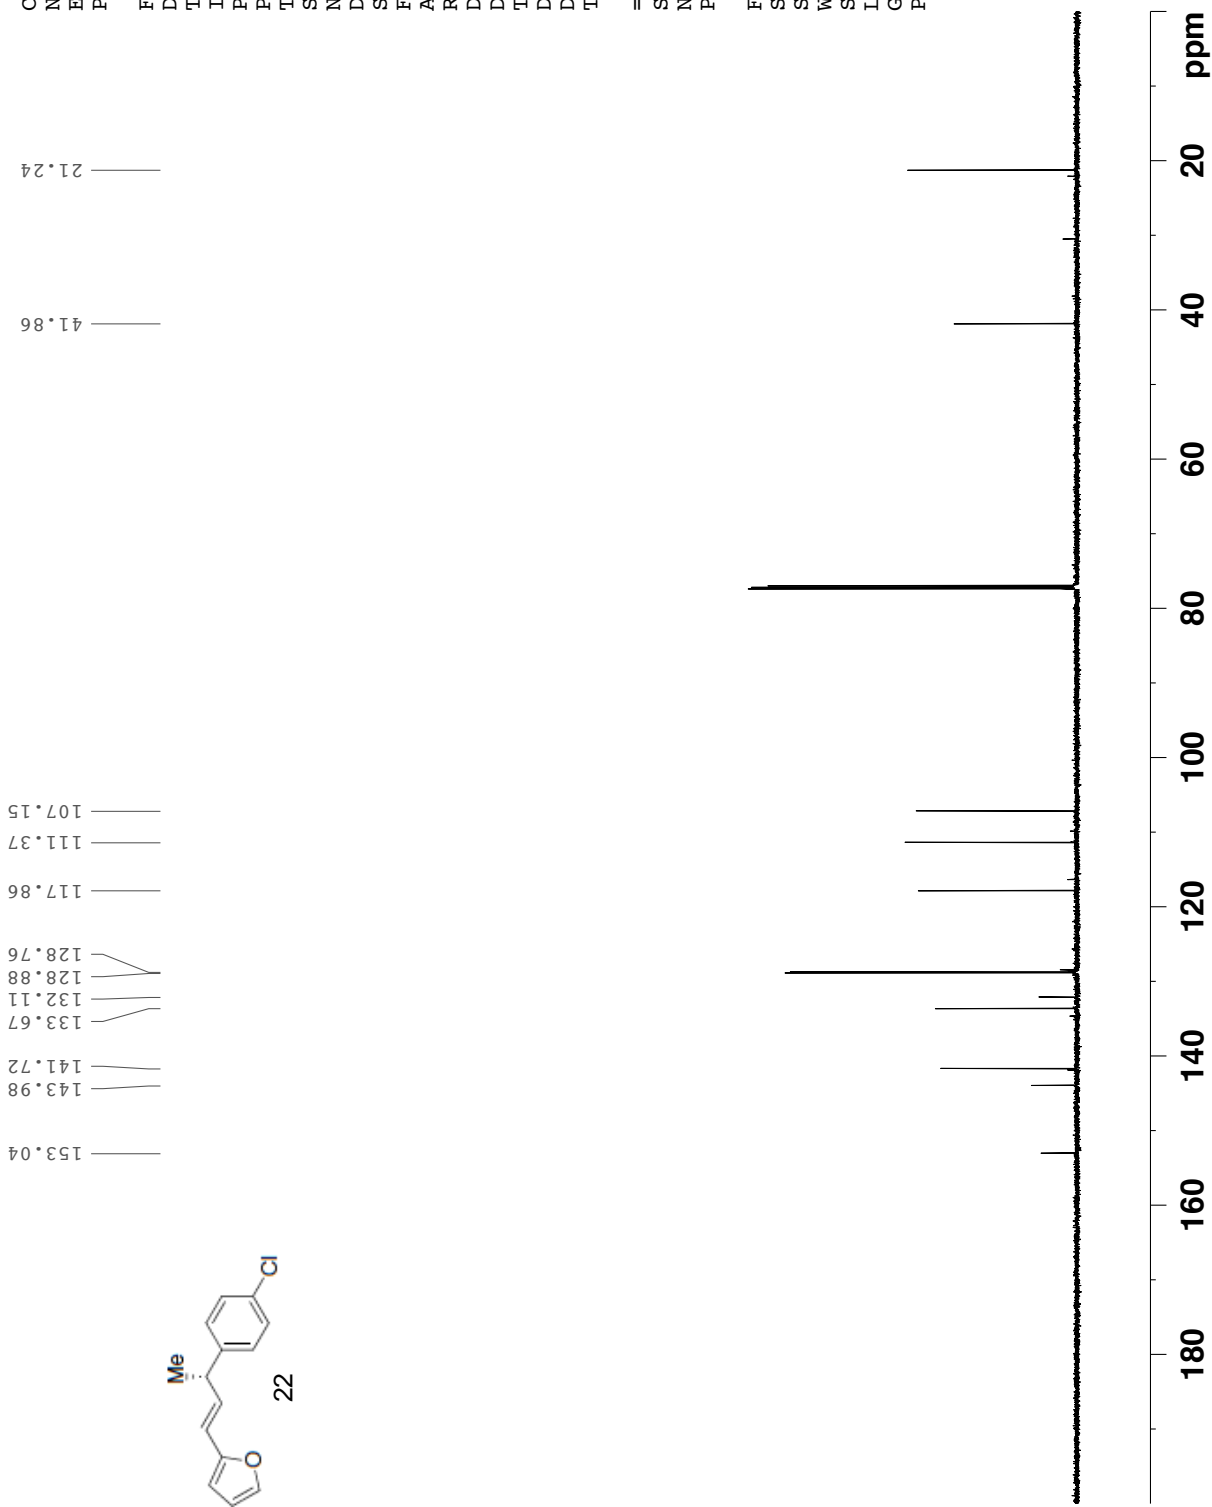



compound 23

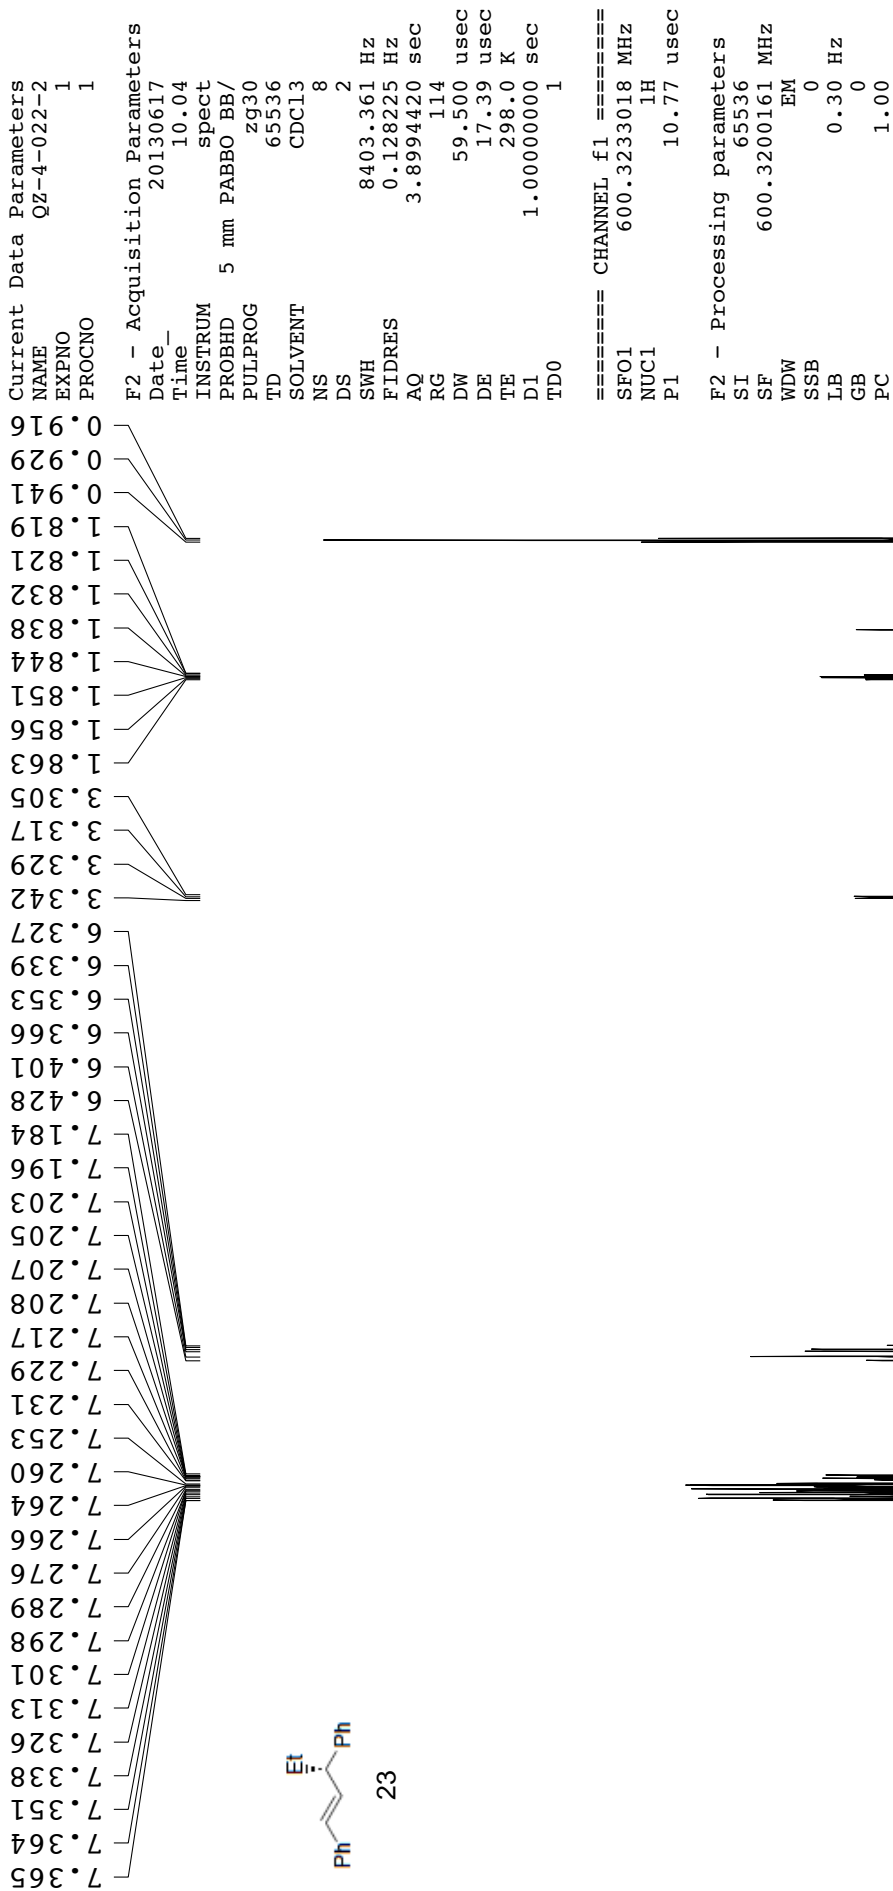



compound 23

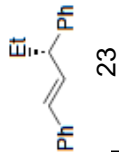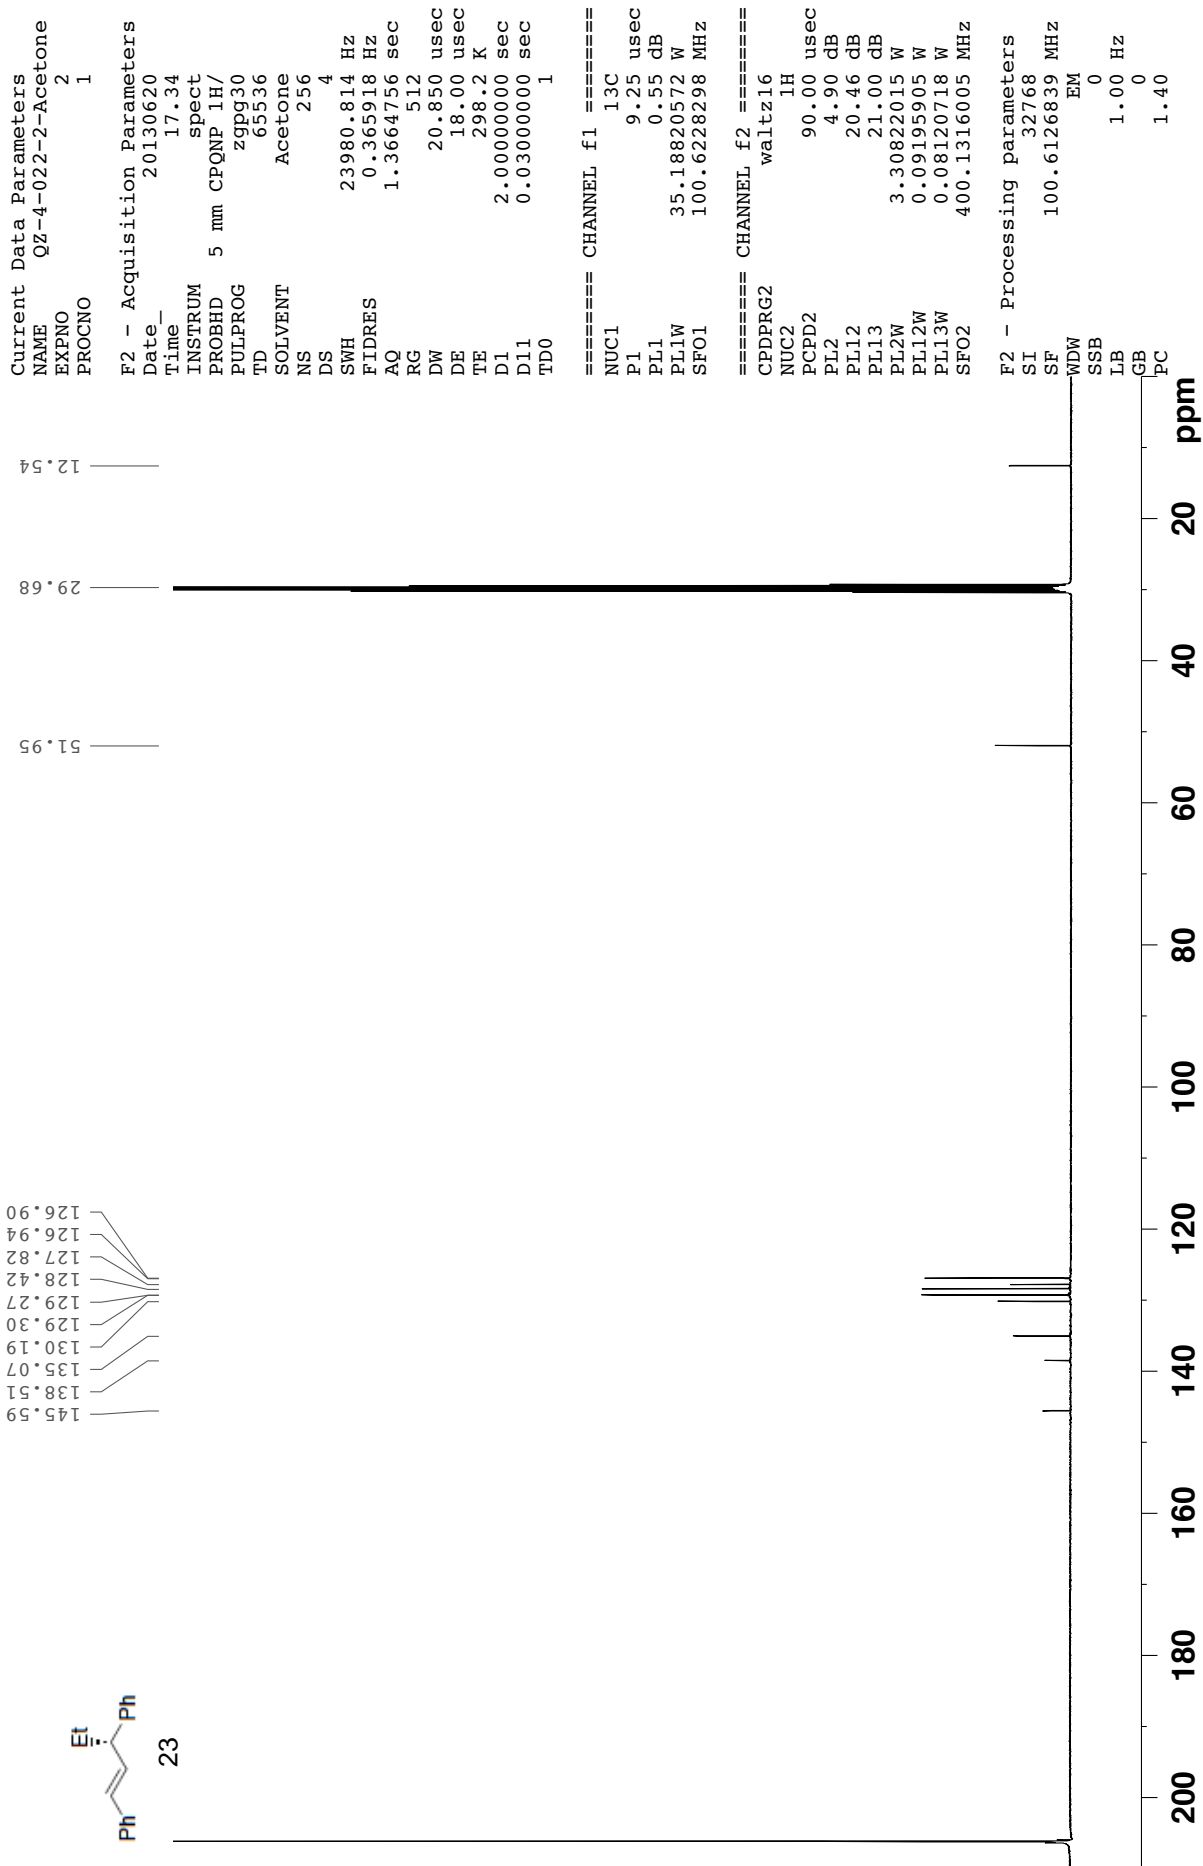

compound 24

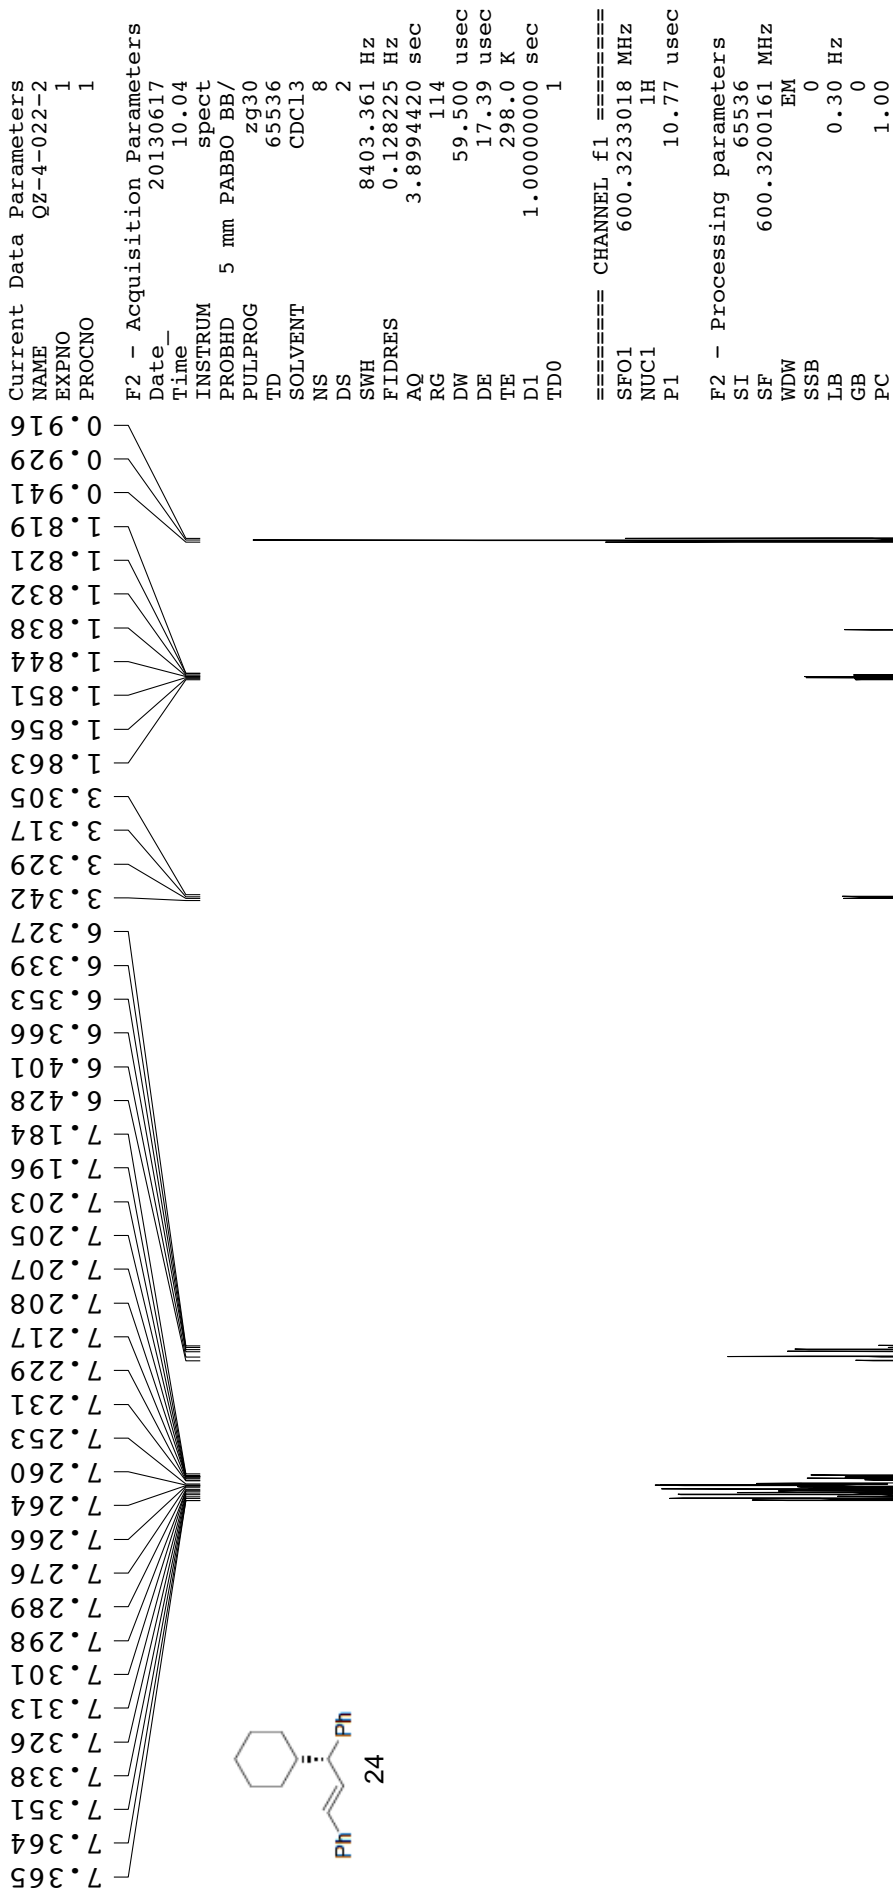

compound 24

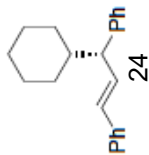

144.22  
137.76  
133.38  
130.32  
128.59  
128.58  
128.13  
127.10  
126.25  
126.17

56.90  
42.84  
31.67  
31.63  
26.68  
26.54

Current Data Parameters  
NAME QZ-4-017  
EXPNO 2  
PROCNO 1

F2 - Acquisition Parameters  
Date\_ 20130628  
Time 10.50  
INSTRUM spect  
PROBHD 5 mm CPQNP 1H/  
PULPROG zgpg30  
TD 65536  
SOLVENT CDC13  
NS 256  
DS 4  
SWH 23980.814 Hz  
FIDRES 0.365918 Hz  
AQ 1.3664756 sec  
RG 512  
DW 20.850 usec  
DE 18.00 usec  
TE 298.2 K  
D1 2.00000000 sec  
D11 0.03000000 sec  
TD0 1

==== CHANNEL f1 =====  
NUC1 13C  
P1 9.25 usec  
PL1 0.55 dB  
PL1W 35.18820572 W  
SFO1 100.6228298 MHz

==== CHANNEL f2 =====  
CPDPRG2 waltz16  
NUC2 1H  
PCPD2 90.00 usec  
PL2 4.90 dB  
PL12 20.46 dB  
PL13 21.00 dB  
PL2W 3.30822015 W  
PL12W 0.09195905 W  
PL13W 0.08120718 W  
SFO2 400.1316005 MHz

F2 - Processing parameters  
SI 32768  
SF 100.6127549 MHz  
WDW EM  
SSB 0  
LB 1.00 Hz  
GB 0  
PC 1.40

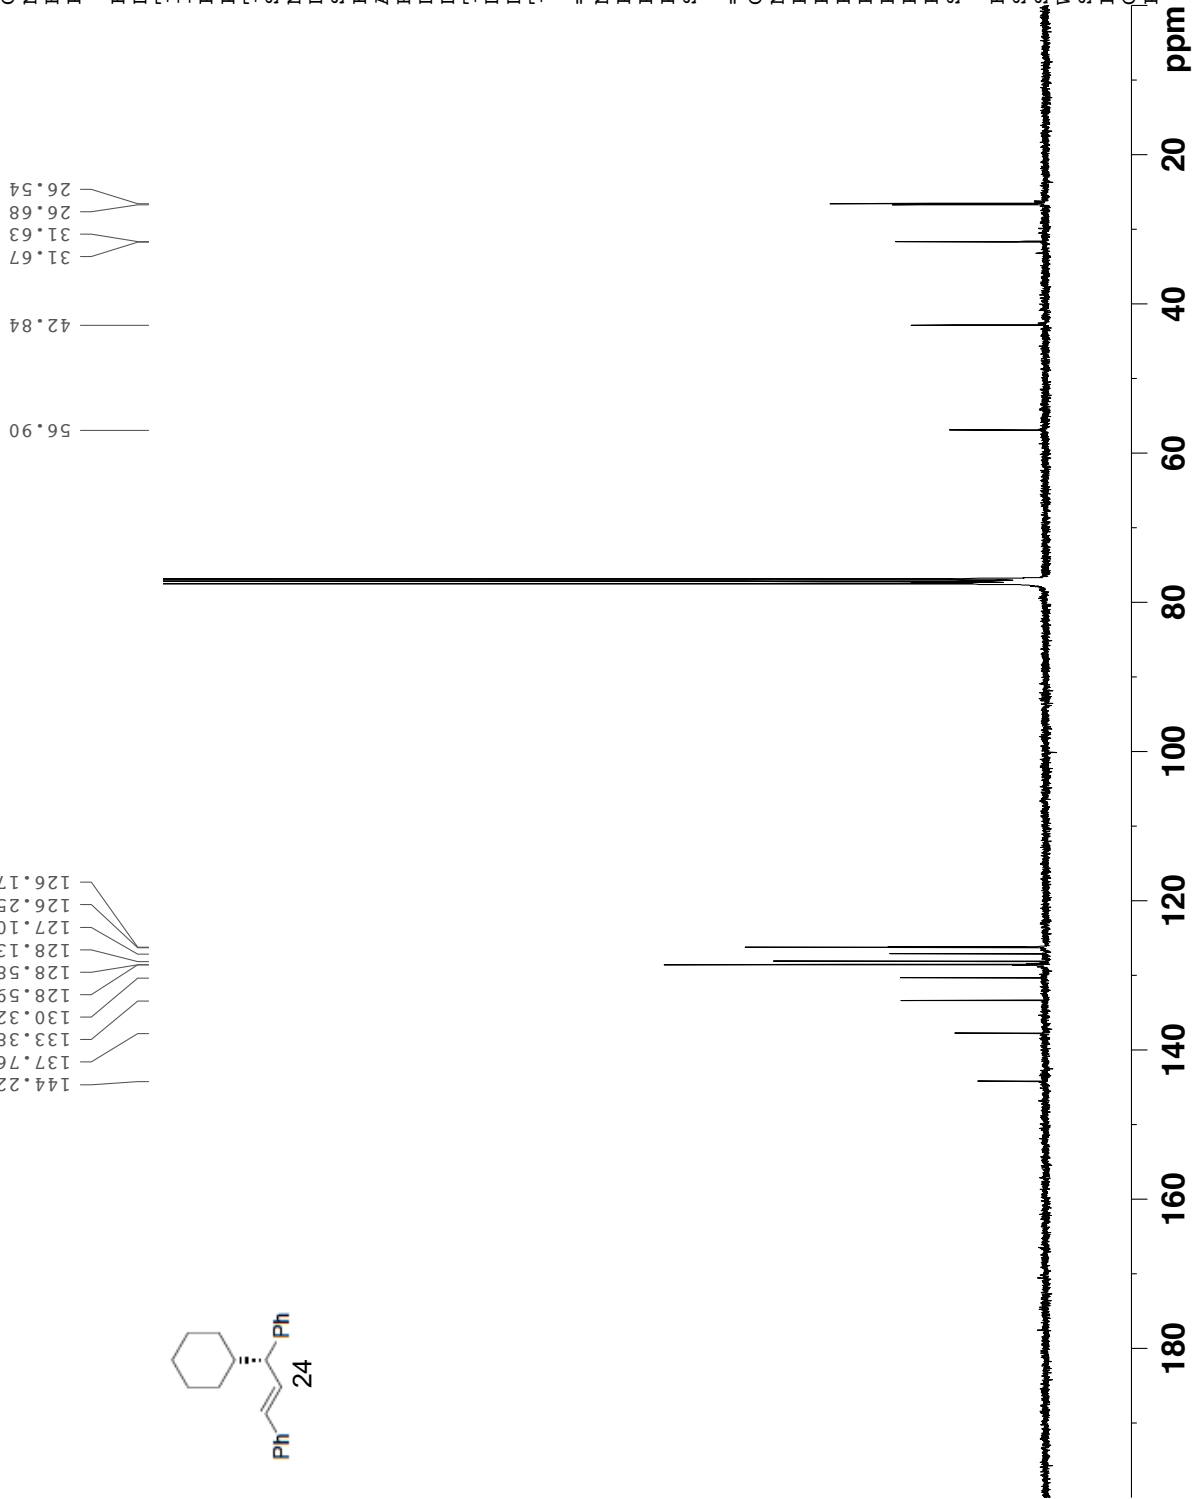



compound 1a



Current Data Parameters  
NAME HH-4-248  
EXPNO 2  
PROCNO 1

F2 - Acquisition Parameters  
Date\_ 20130426  
Time\_ 0.18  
INSTRUM spect  
PROBHD 5 mm CPQNP 1H/  
PULPROG zgpg30  
TD 65536  
SOLVENT CDC13  
NS 1024  
DS 4  
SWH 23980.814 Hz  
FIDRES 0.365918 Hz  
AQ 1.3664756 sec  
RG 512  
DW 20.850 usec  
DE 18.00 usec  
TE 298.2 K  
D1 2.00000000 sec  
D11 0.03000000 sec  
TD0 1

=====  
CHANNEL f1  
NUC1 13C  
P1 9.25 usec  
PL1 0.55 dB  
PL1W 35.18820572 W  
SFO1 100.6228298 MHz

=====  
CHANNEL f2  
CPDPRG2 waltz16  
NUC2 1H  
PCPD2 90.00 usec  
PL2 4.90 dB  
PL12 20.46 dB  
PL13 21.00 dB  
PL2W 3.30822015 W  
PL12W 0.09195905 W  
PL13W 0.08120718 W  
SFO2 400.1316005 MHz

F2 - Processing parameters  
SI 32768  
SF 100.6127538 MHz  
WDW EM  
SSB 0  
LB 1.00 Hz  
GB 0  
PC 1.40

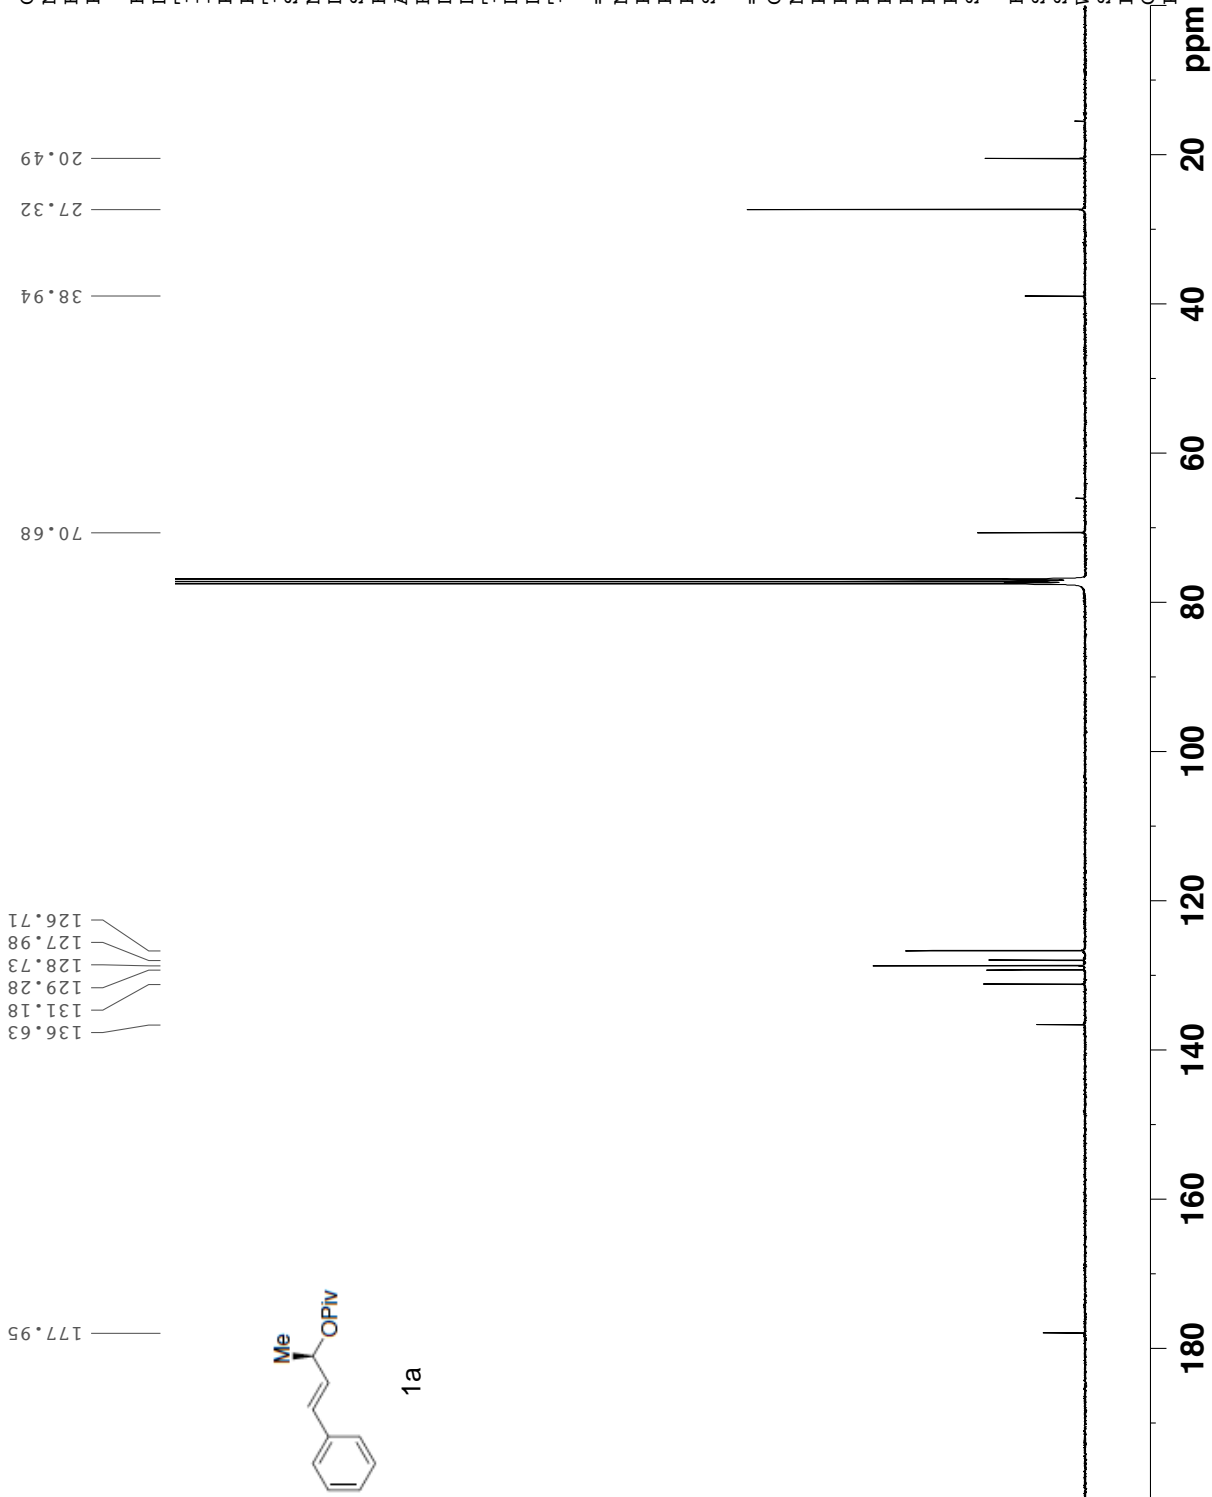



compound 1b

Current Data Parameters  
NAME HH-4-148  
EXPNO 1  
PROCNO 1

F2 - Acquisition Parameters  
Date\_ 20130201  
Time\_ 2.32  
INSTRUM spect  
PROBHD 5 mm CPQNP 1H/  
PULPROG zg30  
TD 65536  
SOLVENT CDCl3  
NS 16  
DS 2  
SWH 8278.146 Hz  
FIDRES 0.126314 Hz  
AQ 3.9584243 sec  
RG 11.3  
DW 60.400 usec  
DE 6.00 usec  
TE 298.1 K  
D1 1.00000000 sec  
TD0 1

==== CHANNEL f1 =====  
NUC1 1H  
P1 15.00 usec  
PL1 4.90 dB  
PL1W 3.30822015 W  
SFO1 400.1324710 MHz

F2 - Processing parameters  
SI 32768  
SF 400.1300107 MHz  
WDW EM  
SSB 0  
LB 0.30 Hz  
GB 0  
PC 1.00

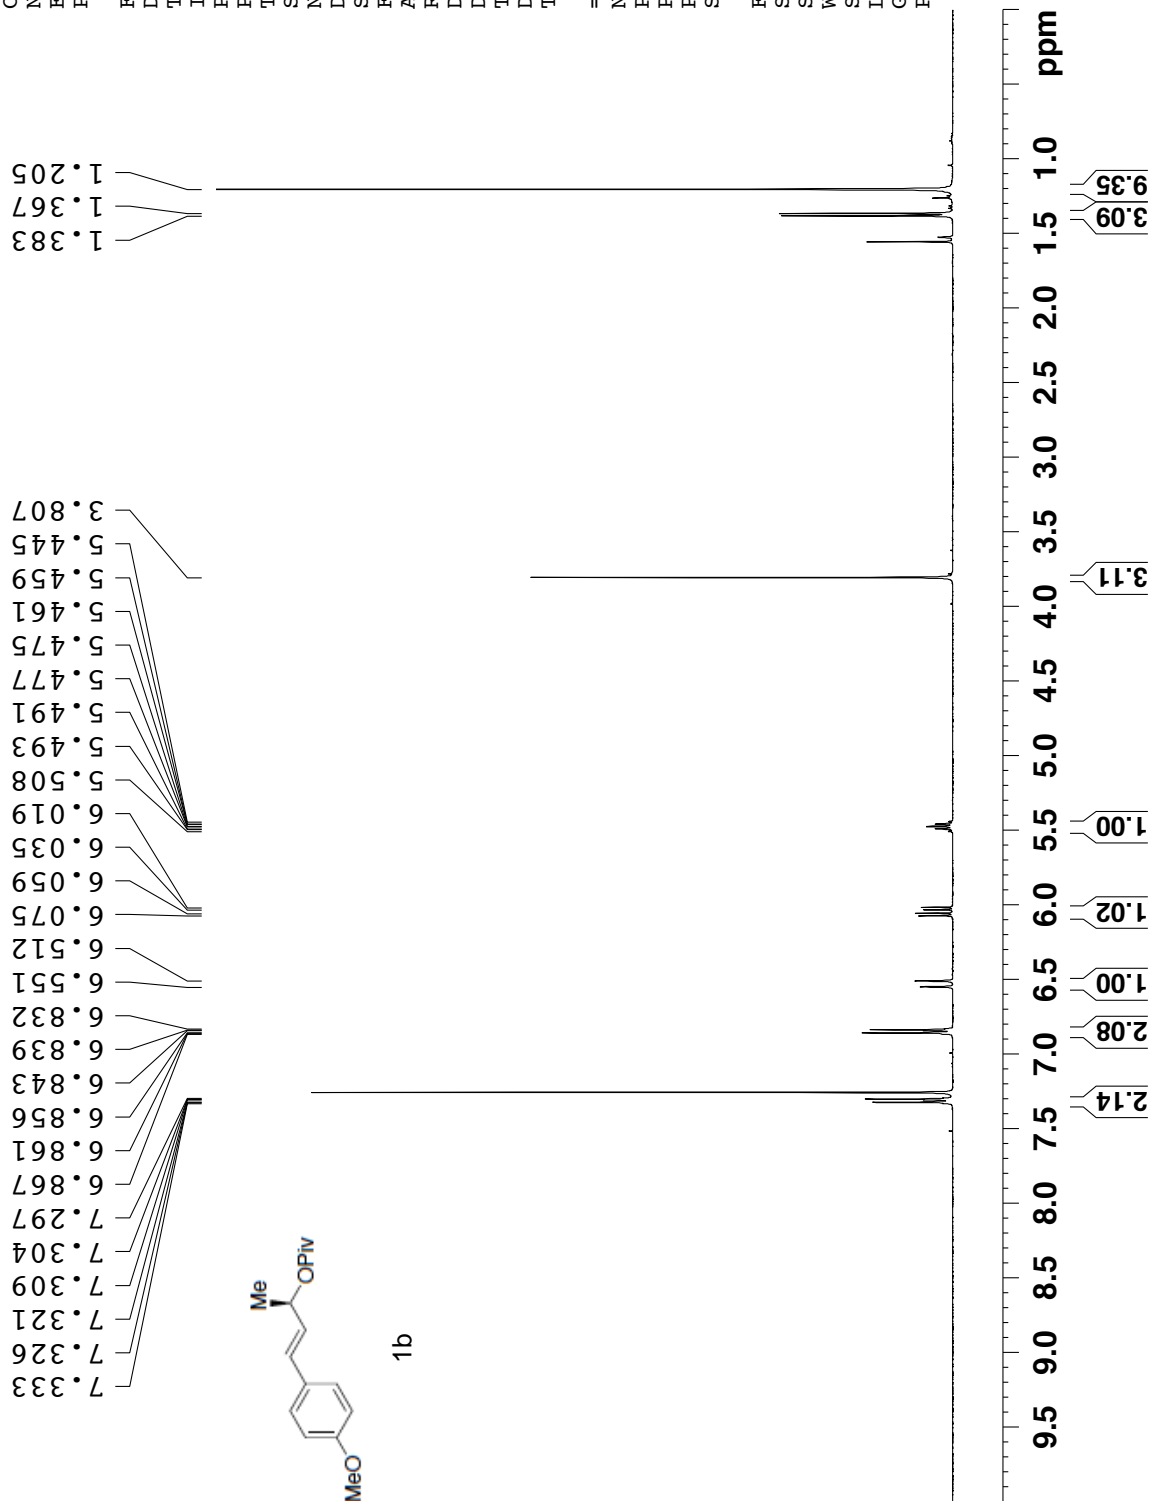



compound 1b

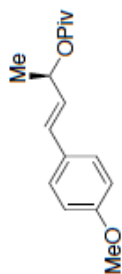

1b

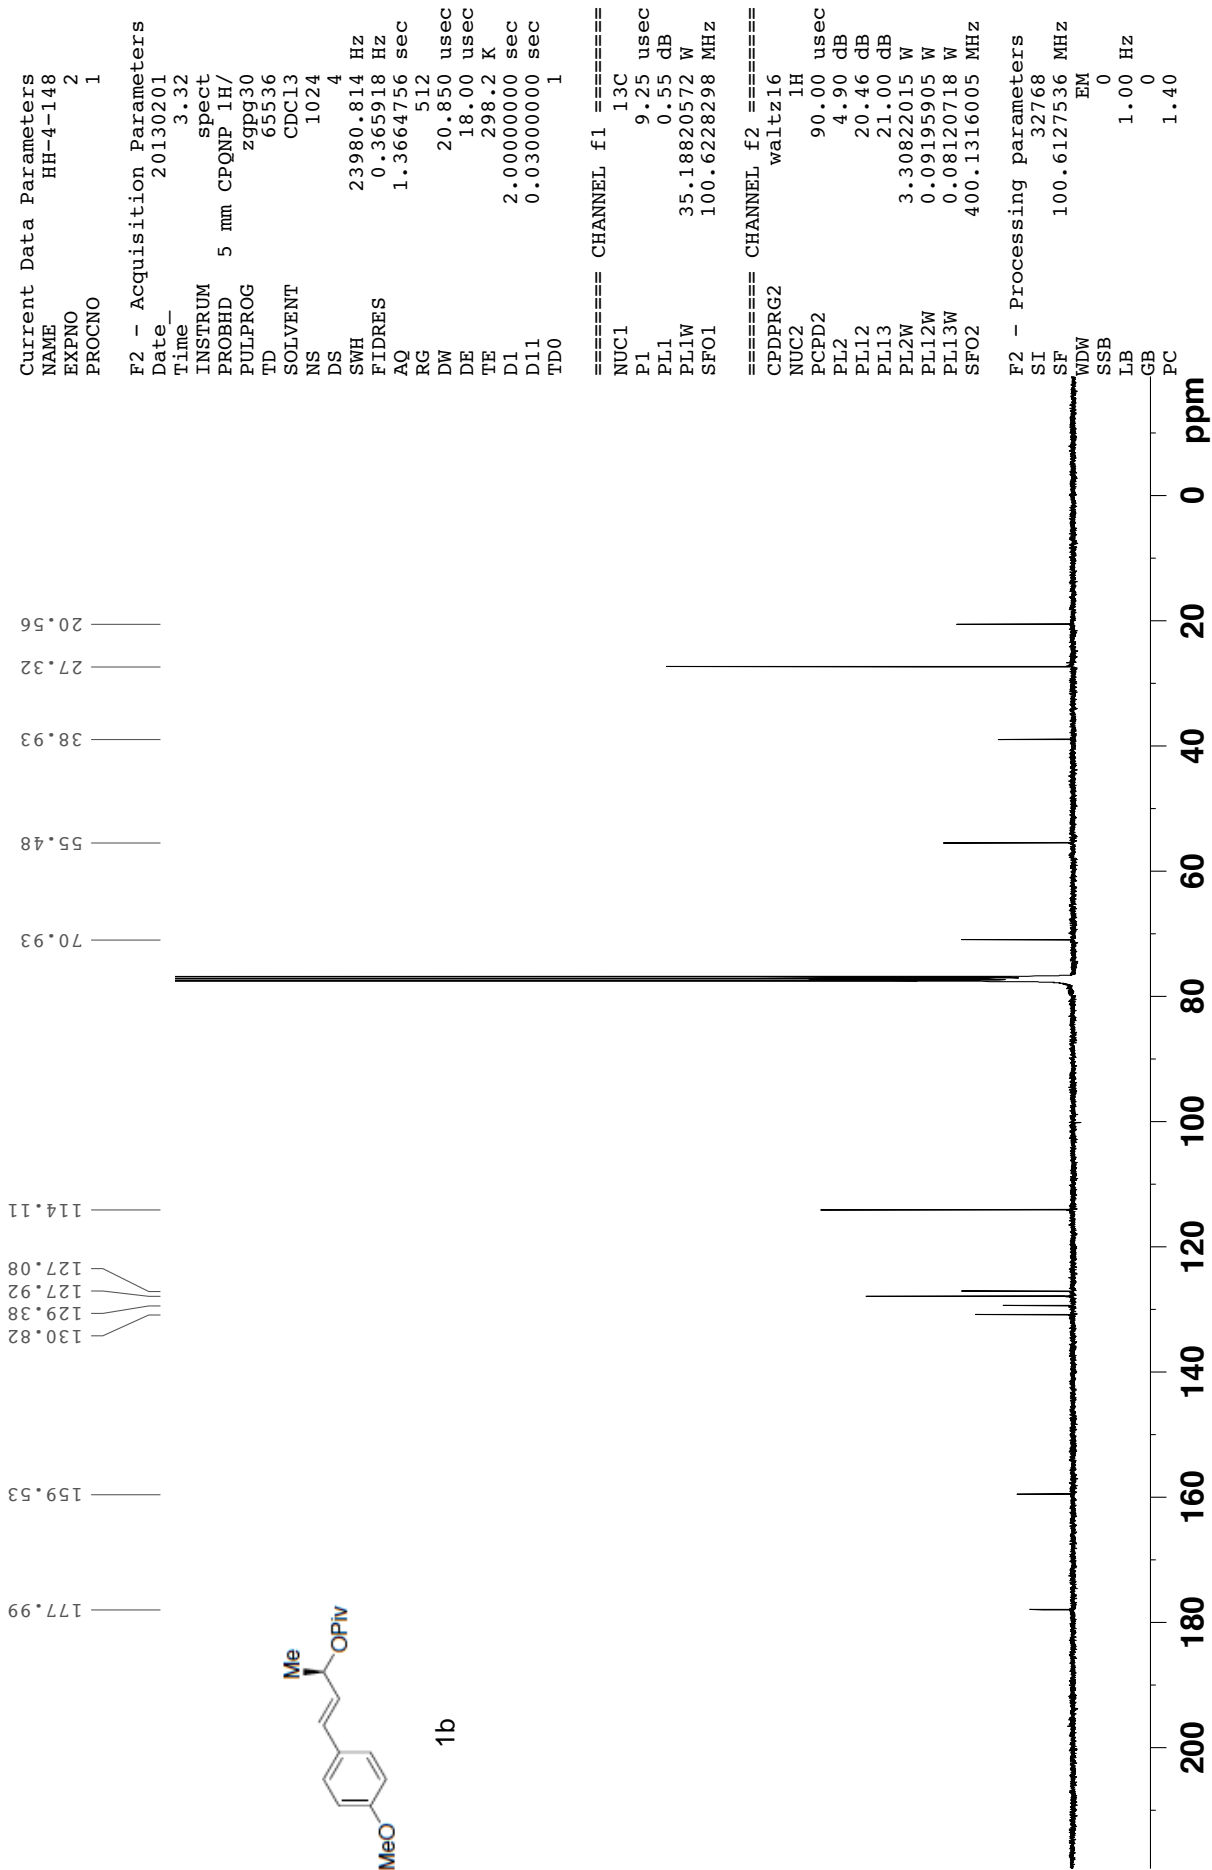



compound 1c

7.366  
7.359  
7.354  
7.346  
7.338  
7.329  
7.324  
7.317  
7.031  
7.024  
7.019  
7.002  
6.986  
6.981  
6.973  
6.566  
6.526  
6.127  
6.111  
6.087  
6.071  
5.510  
5.497  
5.494  
5.480  
5.478  
5.464  
5.462  
5.448

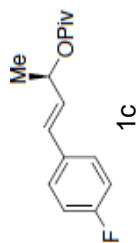

1.390  
1.374  
1.212

Current Data Parameters  
 NAME HH-4-202  
 EXPNO 1  
 PROCNO 1

F2 - Acquisition Parameters  
 Date\_ 20130316  
 Time\_ 17.41  
 INSTRUM spect  
 PROBHD 5 mm CPQNP 1H/  
 PULPROG zg30  
 TD 65536  
 SOLVENT CDCl3  
 NS 16  
 DS 2  
 SWH 8278.146 Hz  
 FIDRES 0.126314 Hz  
 AQ 3.9584243 sec  
 RG 7.1  
 DW 60.400 usec  
 DE 6.00 usec  
 TE 298.2 K  
 D1 1.00000000 sec  
 TD0 1

==== CHANNEL f1 =====  
 NUC1 1H  
 P1 15.00 usec  
 PL1 4.90 dB  
 PL1W 3.30822015 W  
 SFO1 400.1324710 MHz

F2 - Processing parameters  
 SI 32768  
 SF 400.1300099 MHz  
 WDW EM  
 SSB 0  
 LB 0.30 Hz  
 GB 0  
 PC 1.00

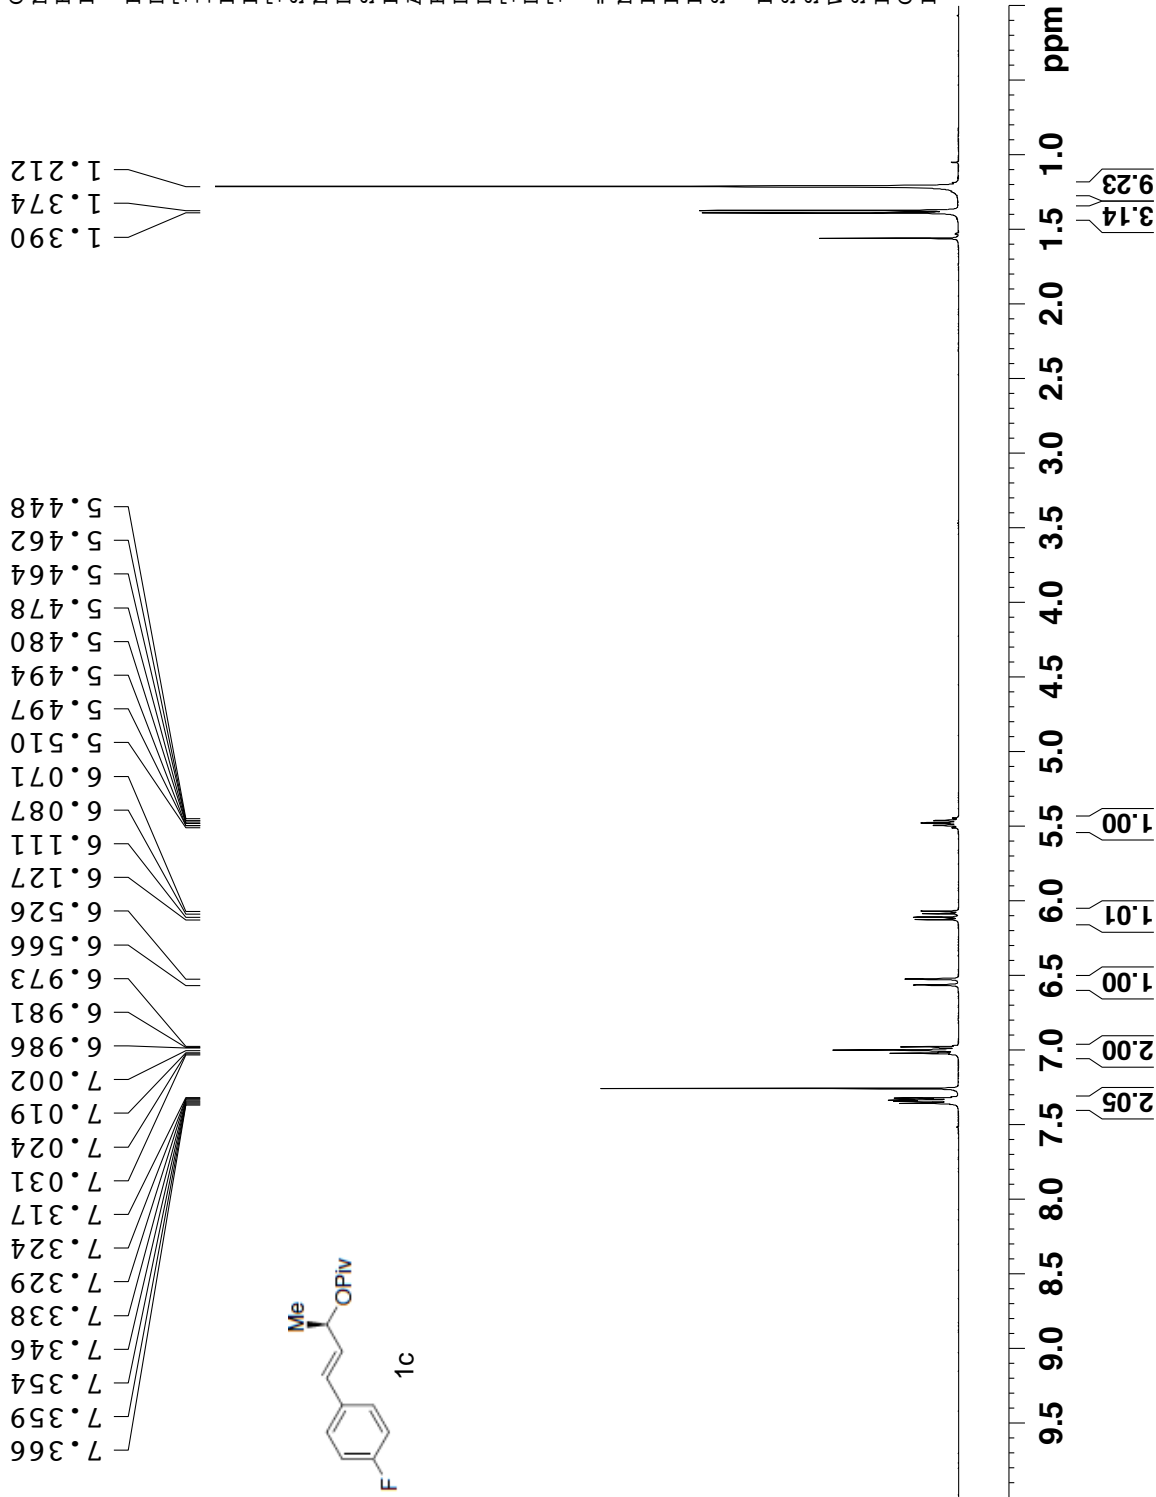





compound 1c

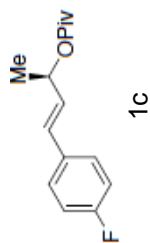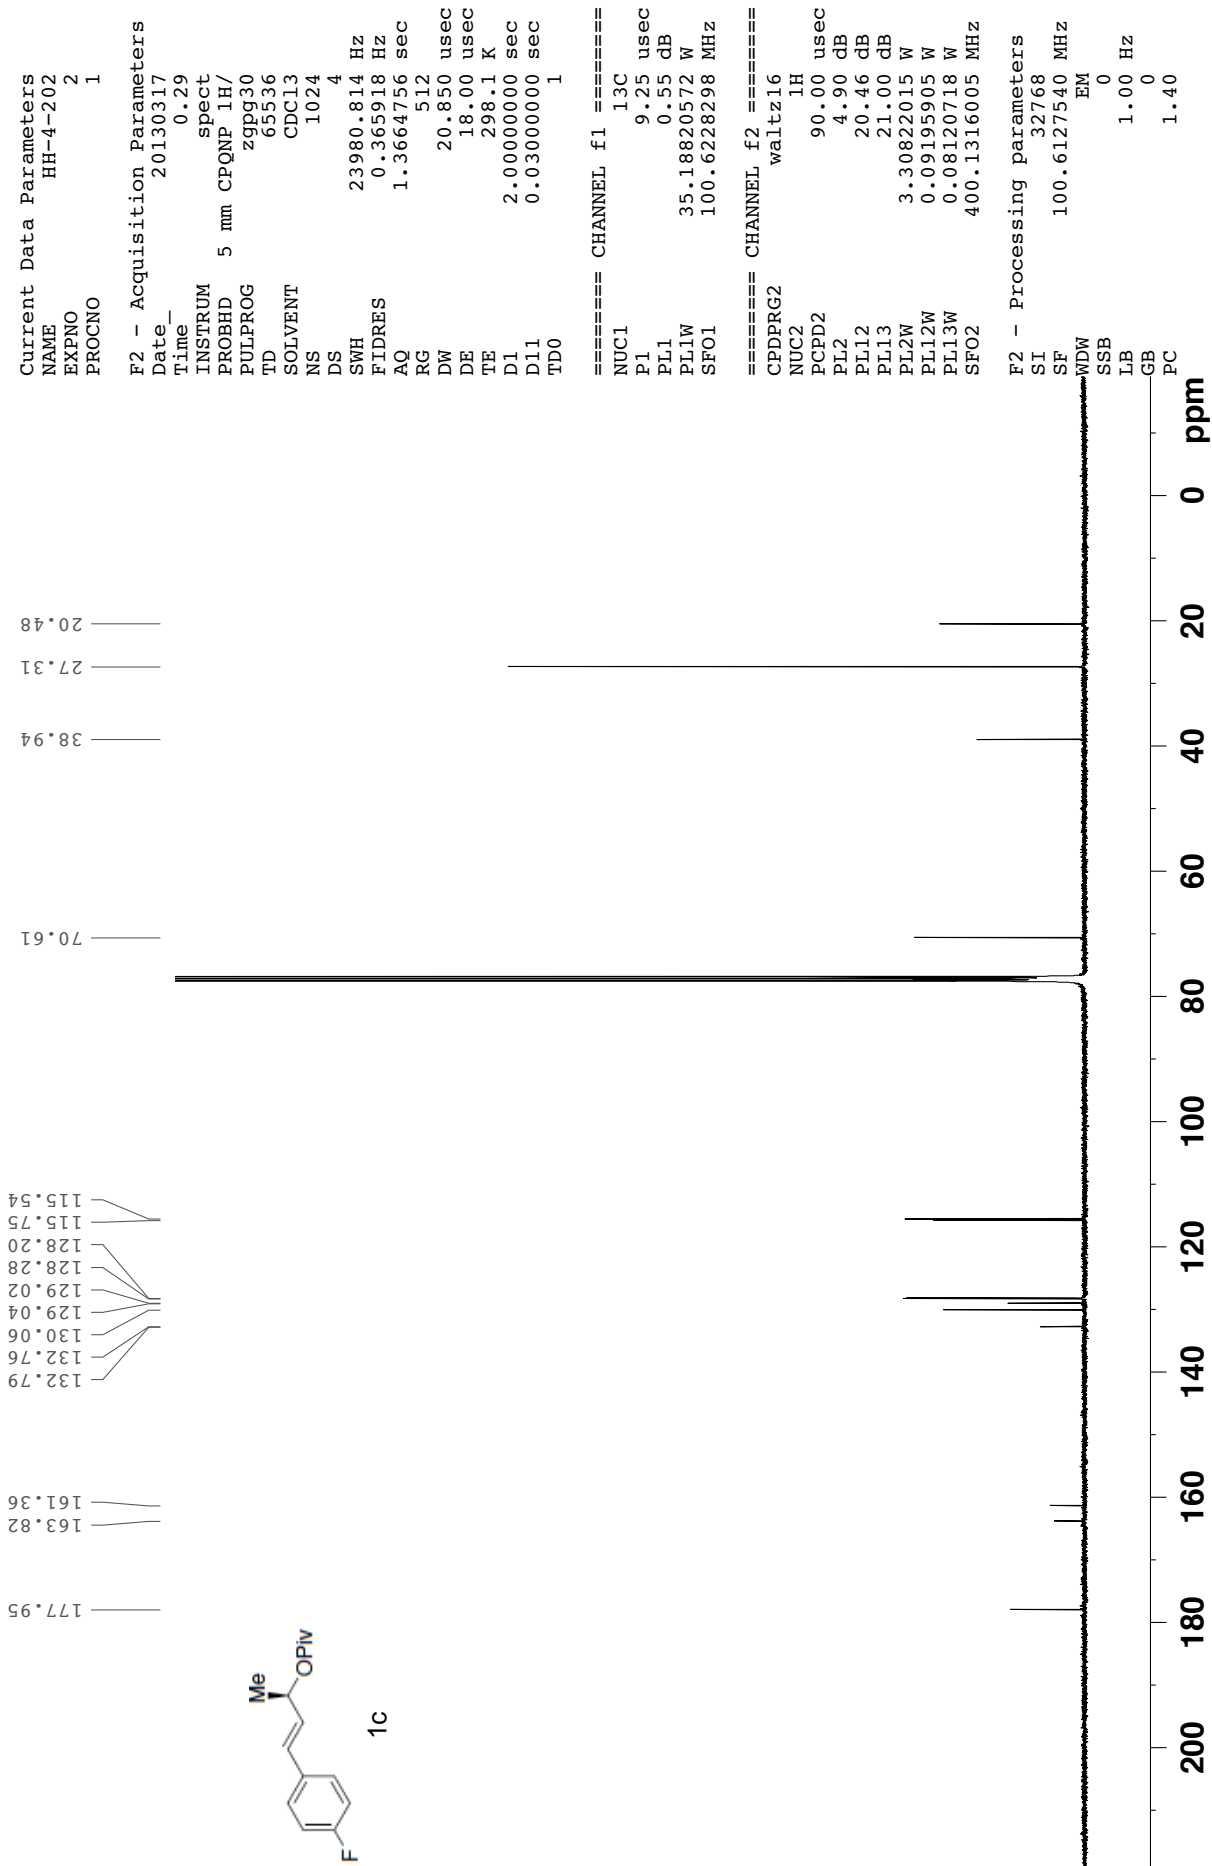



compound 1d

7.316  
7.310  
7.301  
7.294  
7.287  
7.280  
7.271  
7.260  
6.554  
6.552  
6.514  
6.512  
6.187  
6.171  
6.147  
6.131  
5.517  
5.514  
5.501  
5.498  
5.485  
5.482  
5.469  
5.466  
5.452  
5.450

1.391  
1.375  
1.214

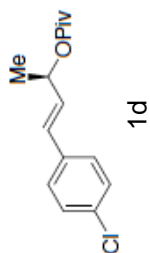

Current Data Parameters  
NAME HH-4-254  
EXPNO 1  
PROCNO 1

F2 - Acquisition Parameters  
Date\_ 20130522  
Time\_ 8.01  
INSTRUM spect  
PROBHD 5 mm CPQNP 1H/  
PULPROG zg30  
TD 65536  
SOLVENT CDC13  
NS 16  
DS 2  
SWH 8278.146 Hz  
FIDRES 0.126314 Hz  
AQ 3.9584243 sec  
RG 8  
DW 60.400 usec  
DE 6.00 usec  
TE 298.1 K  
D1 1.00000000 sec  
TD0 1

==== CHANNEL f1 =====  
NUC1 1H  
P1 15.00 usec  
PL1 4.90 dB  
PL1W 3.30822015 W  
SFO1 400.1324710 MHz

F2 - Processing parameters  
SI 32768  
SF 400.1300094 MHz  
WDW EM  
SSB 0  
LB 0.30 Hz  
GB 0  
PC 1.00

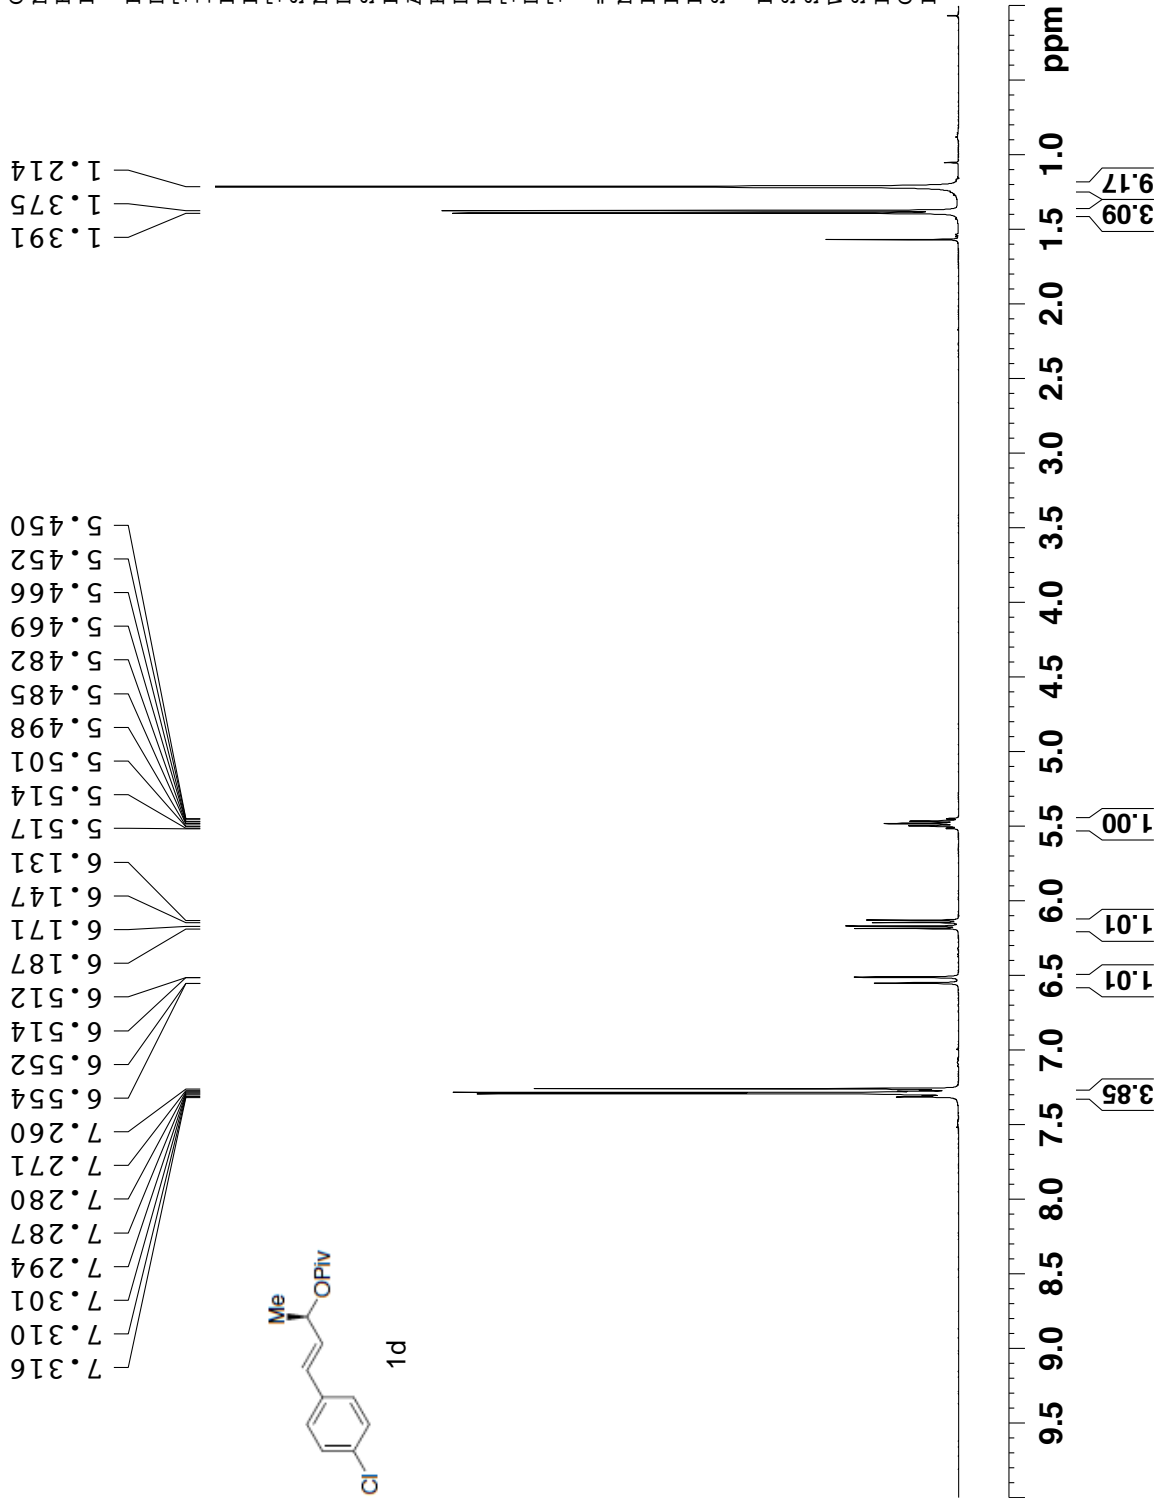



compound 1d

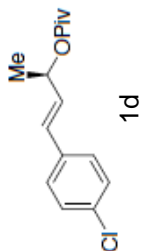

177.94  
135.14  
133.60  
129.97  
129.93  
128.89  
127.93

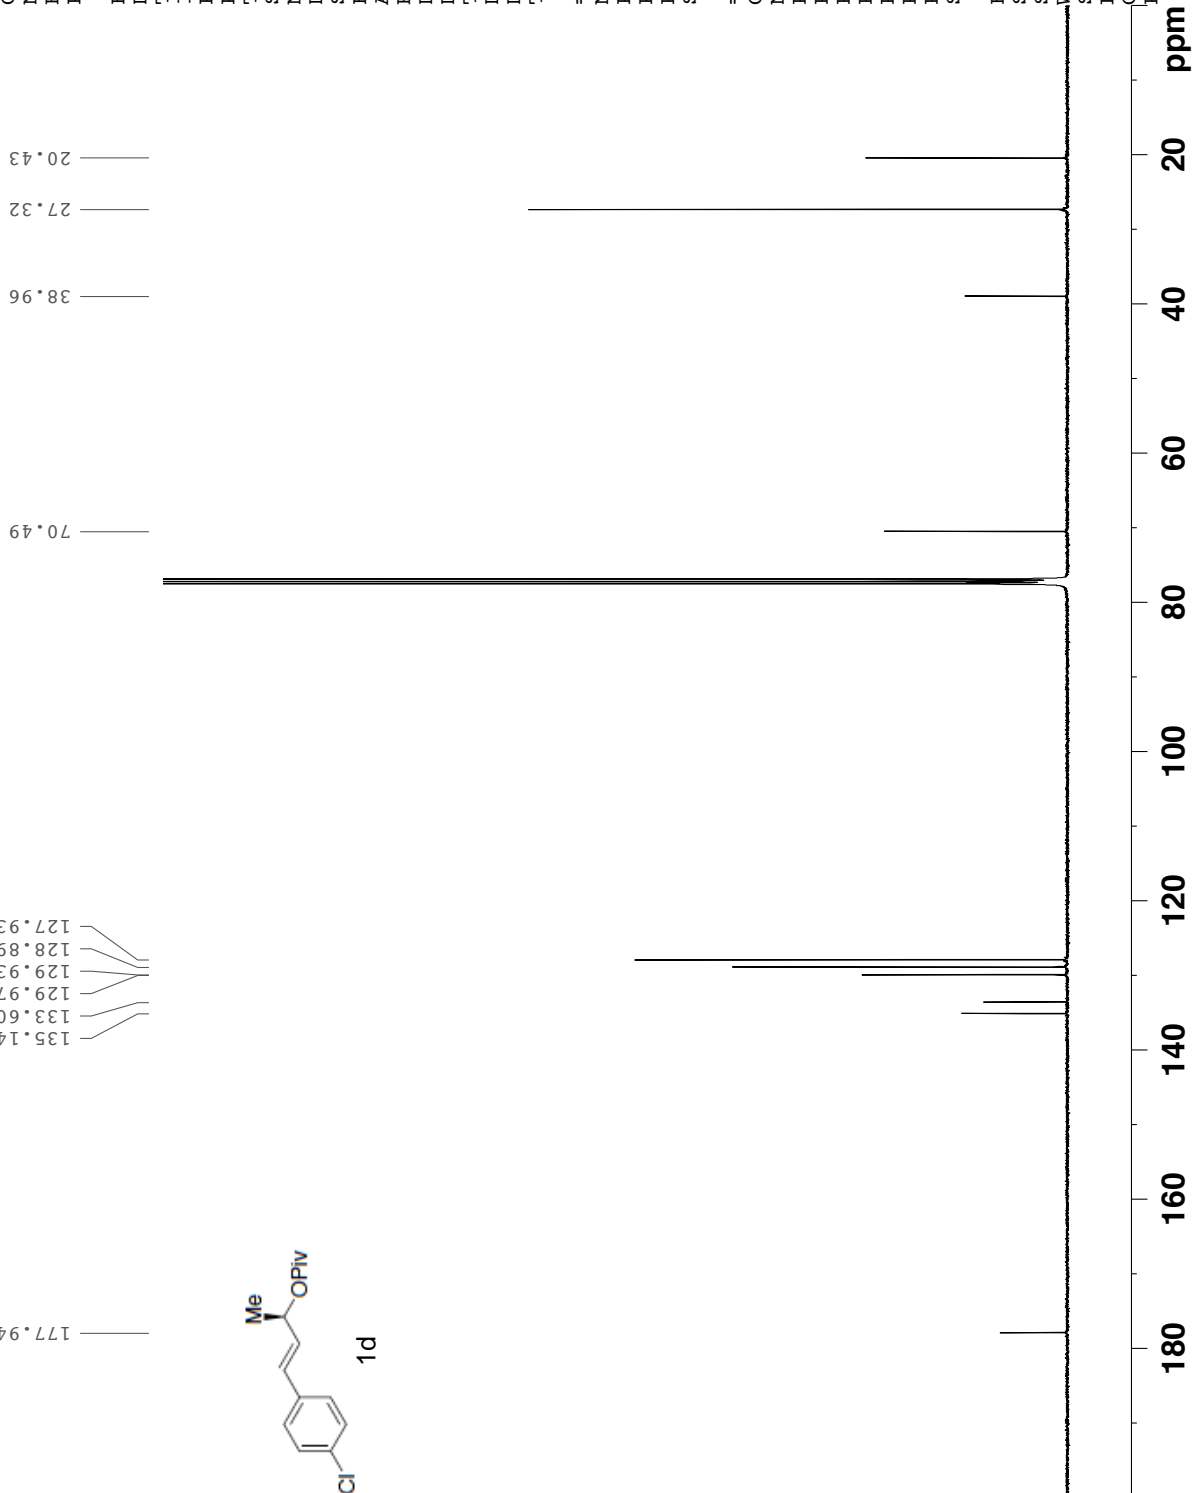

Current Data Parameters  
NAME HH-4-254  
EXPNO 2  
PROCNO 1

F2 - Acquisition Parameters  
Date\_ 20130522  
Time 22.06  
INSTRUM spect  
PROBHD 5 mm CPQNP 1H/  
PULPROG zgpg30  
TD 65536  
SOLVENT CDCl3  
NS 1024  
DS 4  
SWH 23980.814 Hz  
FIDRES 0.365918 Hz  
AQ 1.3664756 sec  
RG 512  
DW 20.850 usec  
DE 18.00 usec  
TE 298.1 K  
D1 2.00000000 sec  
D11 0.03000000 sec  
TD0 1

==== CHANNEL f1 =====  
NUC1 13C  
P1 9.25 usec  
PL1 0.55 dB  
PL1W 35.18820572 W  
SFO1 100.6228298 MHz

==== CHANNEL f2 =====  
CPDPRG2 waltz16  
NUC2 1H  
PCPD2 90.00 usec  
PL2 4.90 dB  
PL12 20.46 dB  
PL13 21.00 dB  
PL2W 3.30822015 W  
PL12W 0.09195905 W  
PL13W 0.08120718 W  
SFO2 400.1316005 MHz

F2 - Processing parameters  
SI 32768  
SF 100.6127529 MHz  
WDW EM  
SSB 0  
LB 1.00 Hz  
GB 0  
PC 1.40



compound 1e

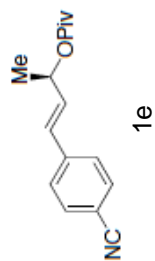

7.610  
7.589  
7.461  
7.440  
6.602  
6.562  
6.335  
6.319  
6.295  
6.279  
5.539  
5.536  
5.523  
5.520  
5.507  
5.504  
5.491  
5.488  
5.475

1.407  
1.391  
1.221

Current Data Parameters  
NAME HH-4-227  
EXPNO 1  
PROCNO 1

F2 - Acquisition Parameters  
Date\_ 20130522  
Time\_ 5.43  
INSTRUM spect  
PROBHD 5 mm CPQNP 1H/  
PULPROG zg30  
TD 65536  
SOLVENT CDC13  
NS 16  
DS 2  
SWH 8278.146 Hz  
FIDRES 0.126314 Hz  
AQ 3.9584243 sec  
RG 9  
DW 60.400 usec  
DE 6.00 usec  
TE 298.1 K  
D1 1.00000000 sec  
TD0 1

==== CHANNEL f1 =====  
NUC1 1H  
P1 15.00 usec  
PL1 4.90 dB  
PL1W 3.30822015 W  
SFO1 400.1324710 MHz

F2 - Processing parameters  
SI 32768  
SF 400.1300094 MHz  
WDW EM  
SSB 0  
LB 0.30 Hz  
GB 0  
PC 1.00

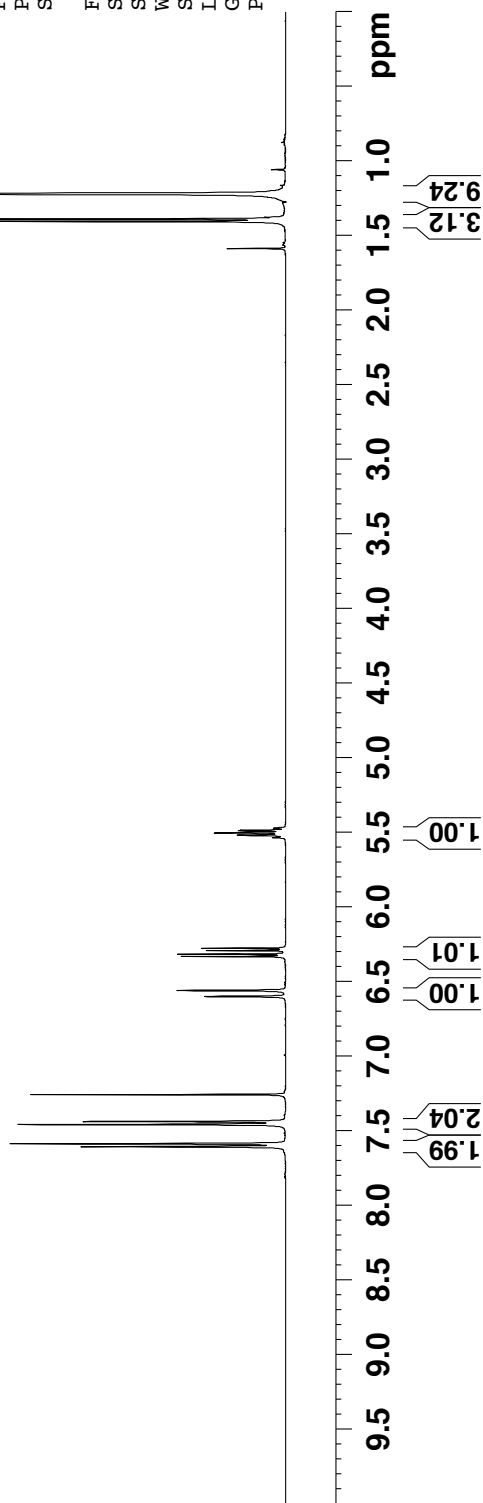



compound 1e

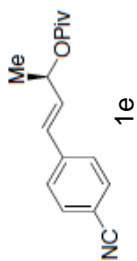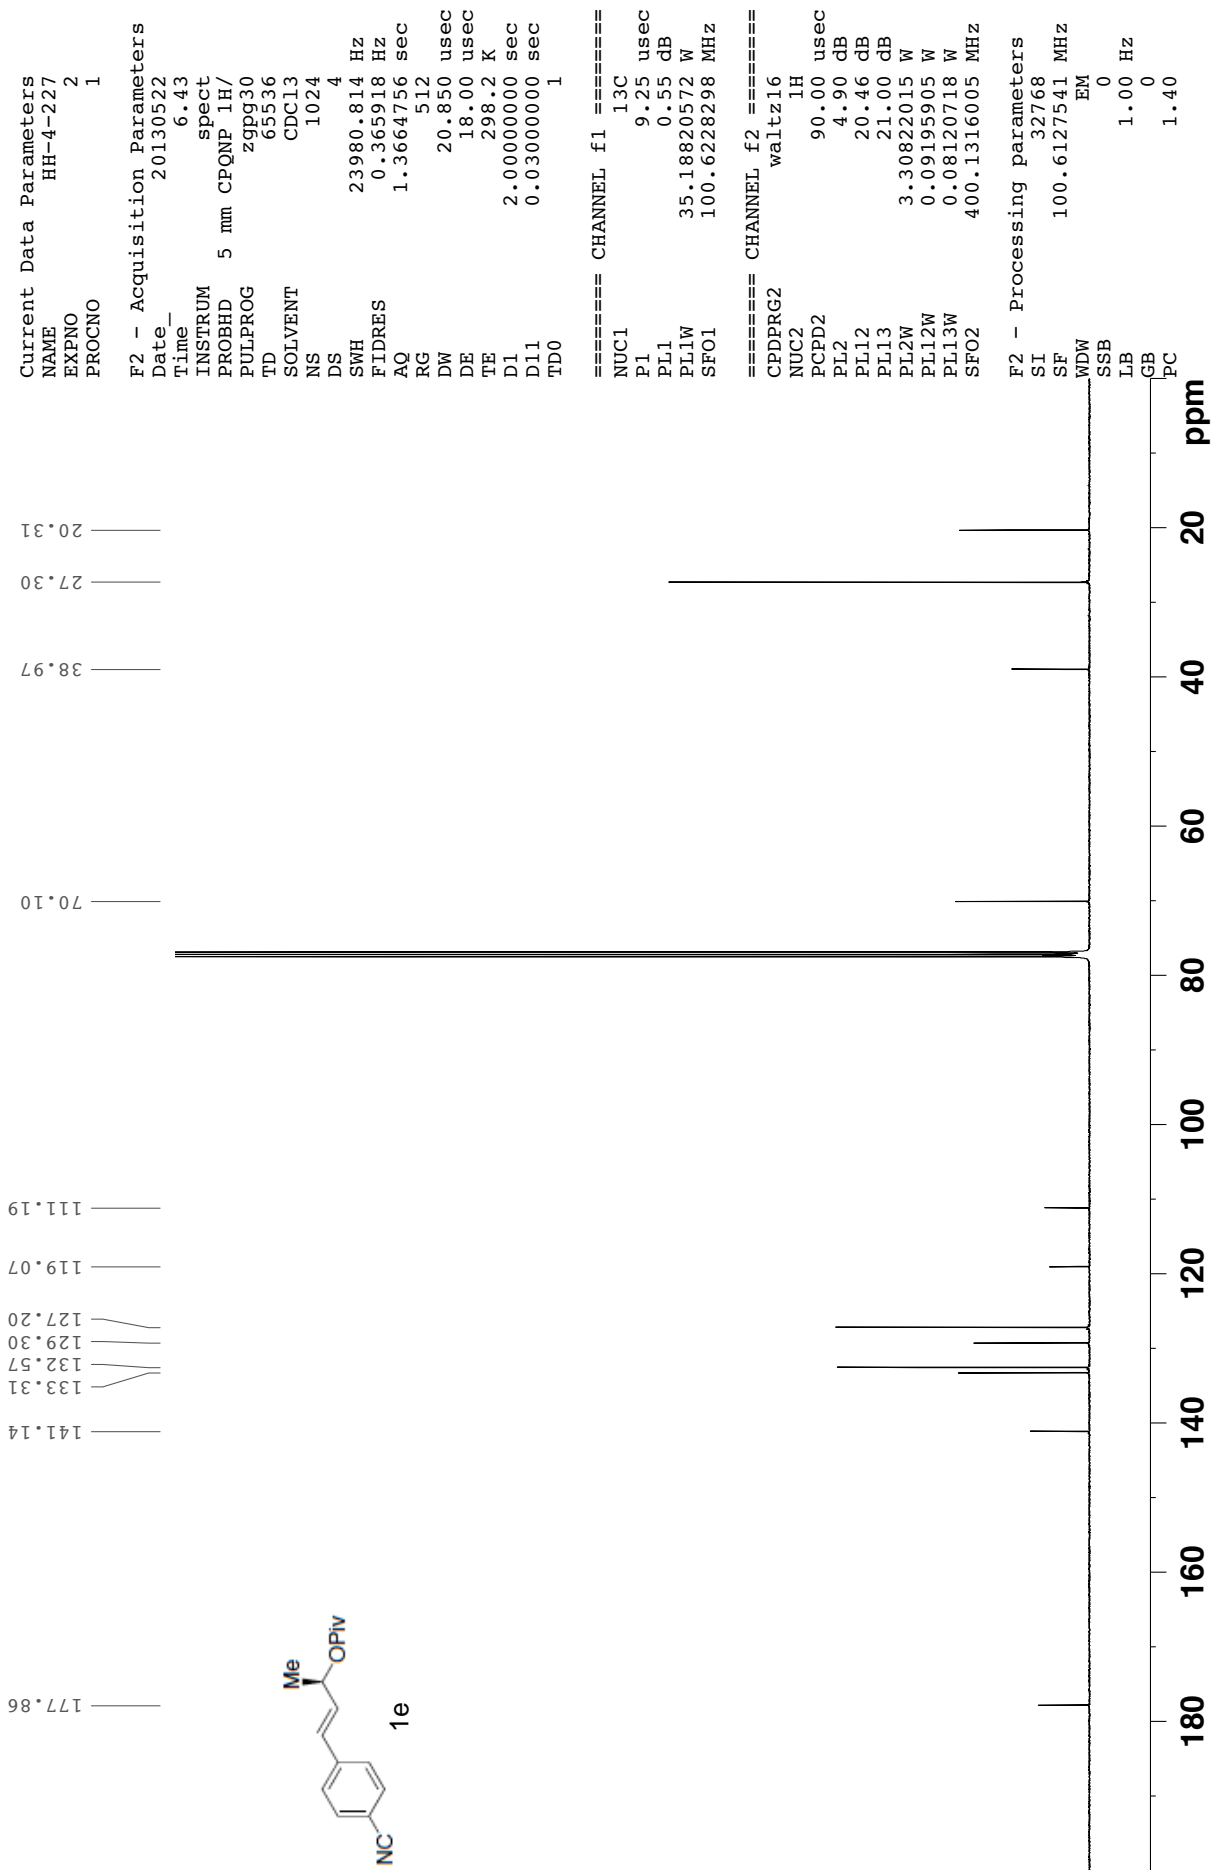

Current Data Parameters  
NAME HH-4-227  
EXPNO 2  
PROCNO 1

F2 - Acquisition Parameters  
Date\_ 20130522  
Time 6.43  
INSTRUM spect  
PROBHD 5 mm CPQNP 1H/  
PULPROG zgpg30  
TD 65536  
SOLVENT CDC13  
NS 1024  
DS 4  
SWH 23980.814 Hz  
FIDRES 0.365918 Hz  
AQ 1.3664756 sec  
RG 512  
DW 20.850 usec  
DE 18.00 usec  
TE 298.2 K  
D1 2.00000000 sec  
D11 0.03000000 sec  
TD0 1

==== CHANNEL f1 =====  
NUC1 13C  
P1 9.25 usec  
PL1 0.55 dB  
PL1W 35.18820572 W  
SFO1 100.6228298 MHz

==== CHANNEL f2 =====  
CPDPRG2 waltz16  
NUC2 1H  
PCPD2 90.00 usec  
PL2 4.90 dB  
PL12 20.46 dB  
PL13 21.00 dB  
PL2W 3.30822015 W  
PL12W 0.09195905 W  
PL13W 0.08120718 W  
SFO2 400.1316005 MHz

F2 - Processing parameters  
SI 32768  
SF 100.6127541 MHz  
EM  
WDW 0  
SSB 1.00 Hz  
LB 0  
GB 0  
PC 1.40





compound 1f

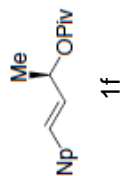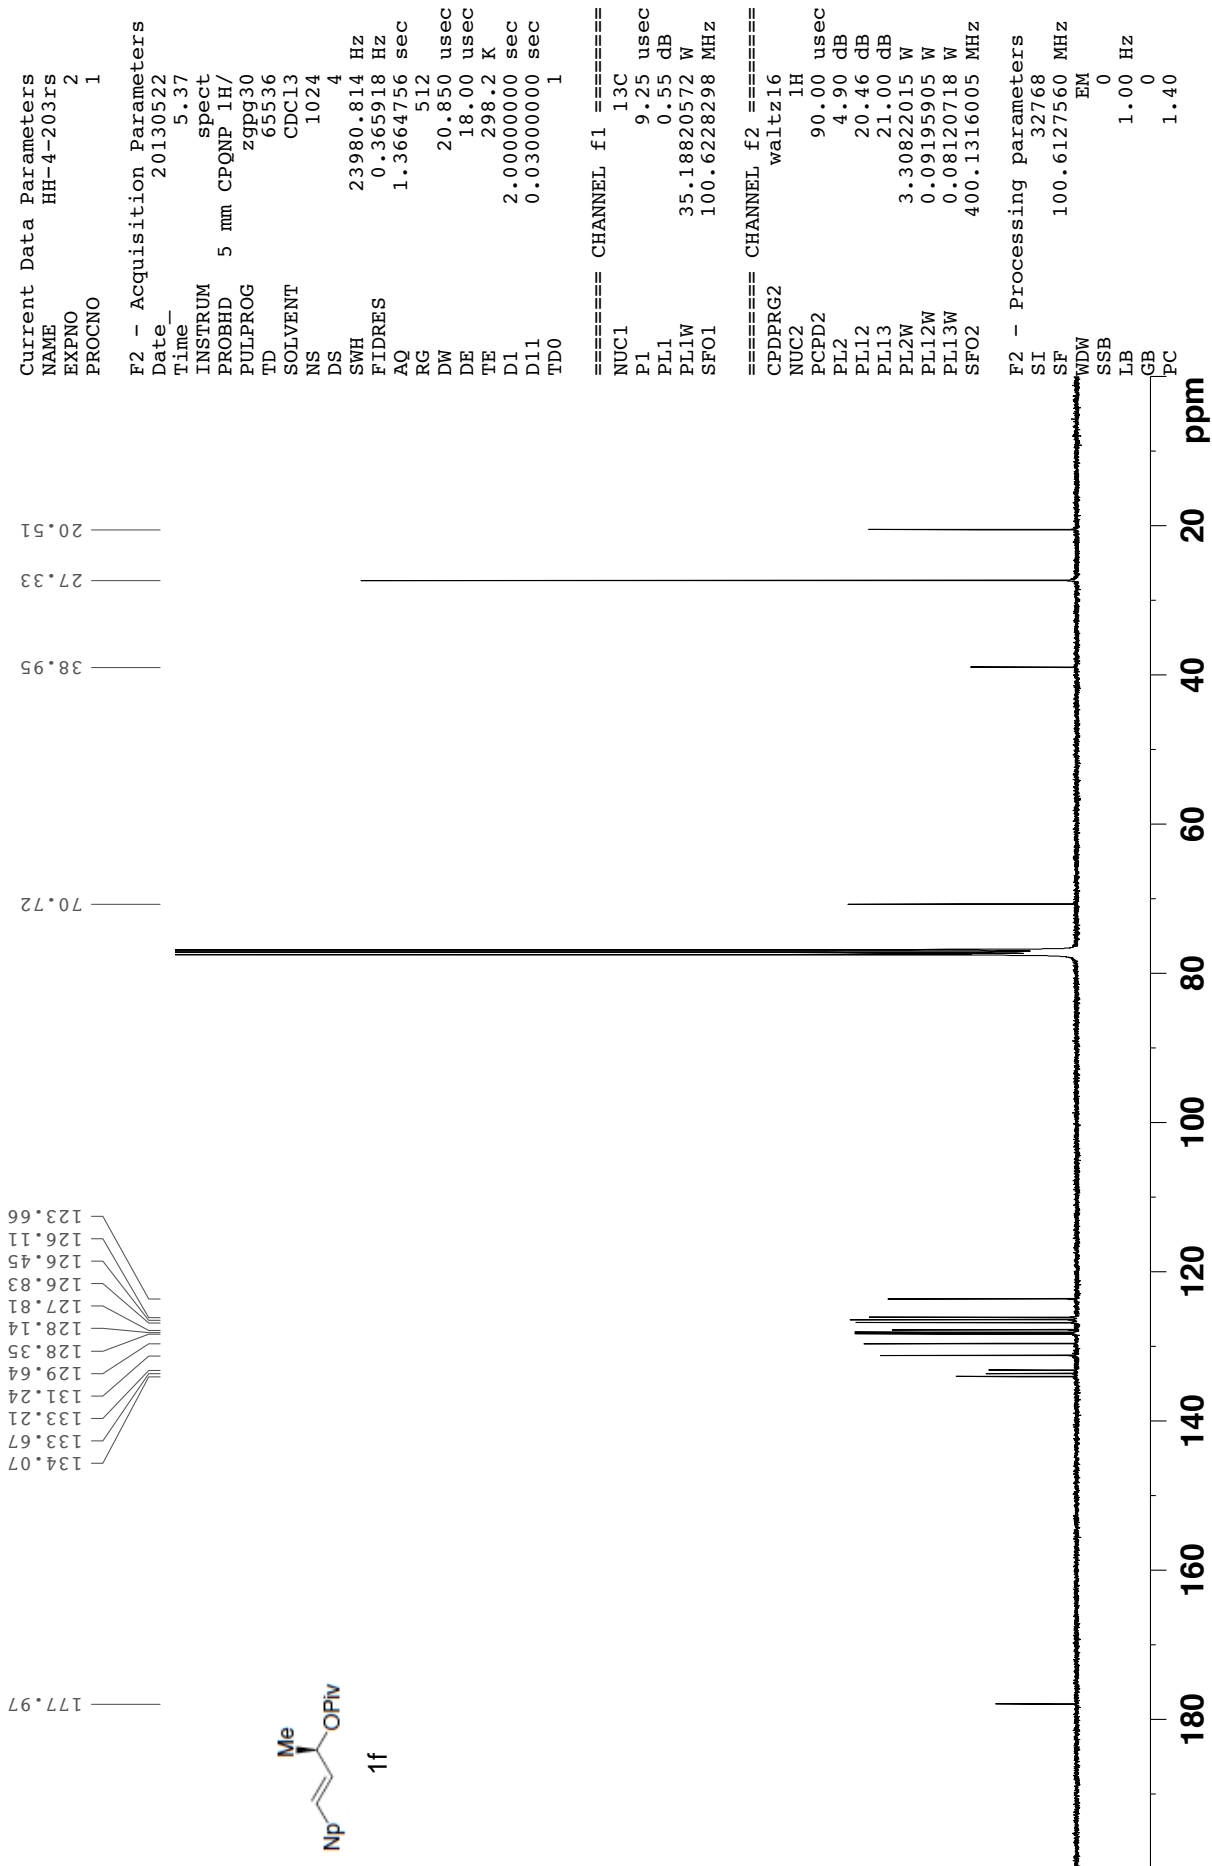



compound 1g

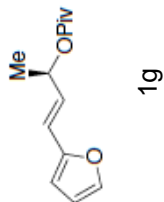

7.367  
6.437  
6.397  
6.389  
6.385  
6.277  
6.269  
6.176  
6.160  
6.136  
6.120  
5.511  
5.495  
5.479  
5.464  
5.448

1.396  
1.380  
1.233

Current Data Parameters  
NAME QZ-3-242-1-RAC  
EXPNO 1  
PROCNO 1

F2 - Acquisition Parameters  
Date\_ 20130422  
Time\_ 13.33  
INSTRUM spect  
PROBHD 5 mm CPQNP 1H/  
PULPROG zg30  
TD 65536  
SOLVENT CDCl3  
NS 16  
DS 2  
SWH 8278.146 Hz  
FIDRES 0.126314 Hz  
AQ 3.9584243 sec  
RG 5.7  
DW 60.400 usec  
DE 6.00 usec  
TE 298.2 K  
D1 1.00000000 sec  
TD0 1

==== CHANNEL f1 =====  
NUC1 1H  
P1 15.00 usec  
PL1 4.90 dB  
PL1W 3.30822015 W  
SFO1 400.1324710 MHz

F2 - Processing parameters  
SI 32768  
SF 400.1300095 MHz  
WDW EM  
SSB 0  
LB 0.30 Hz  
GB 0  
PC 1.00

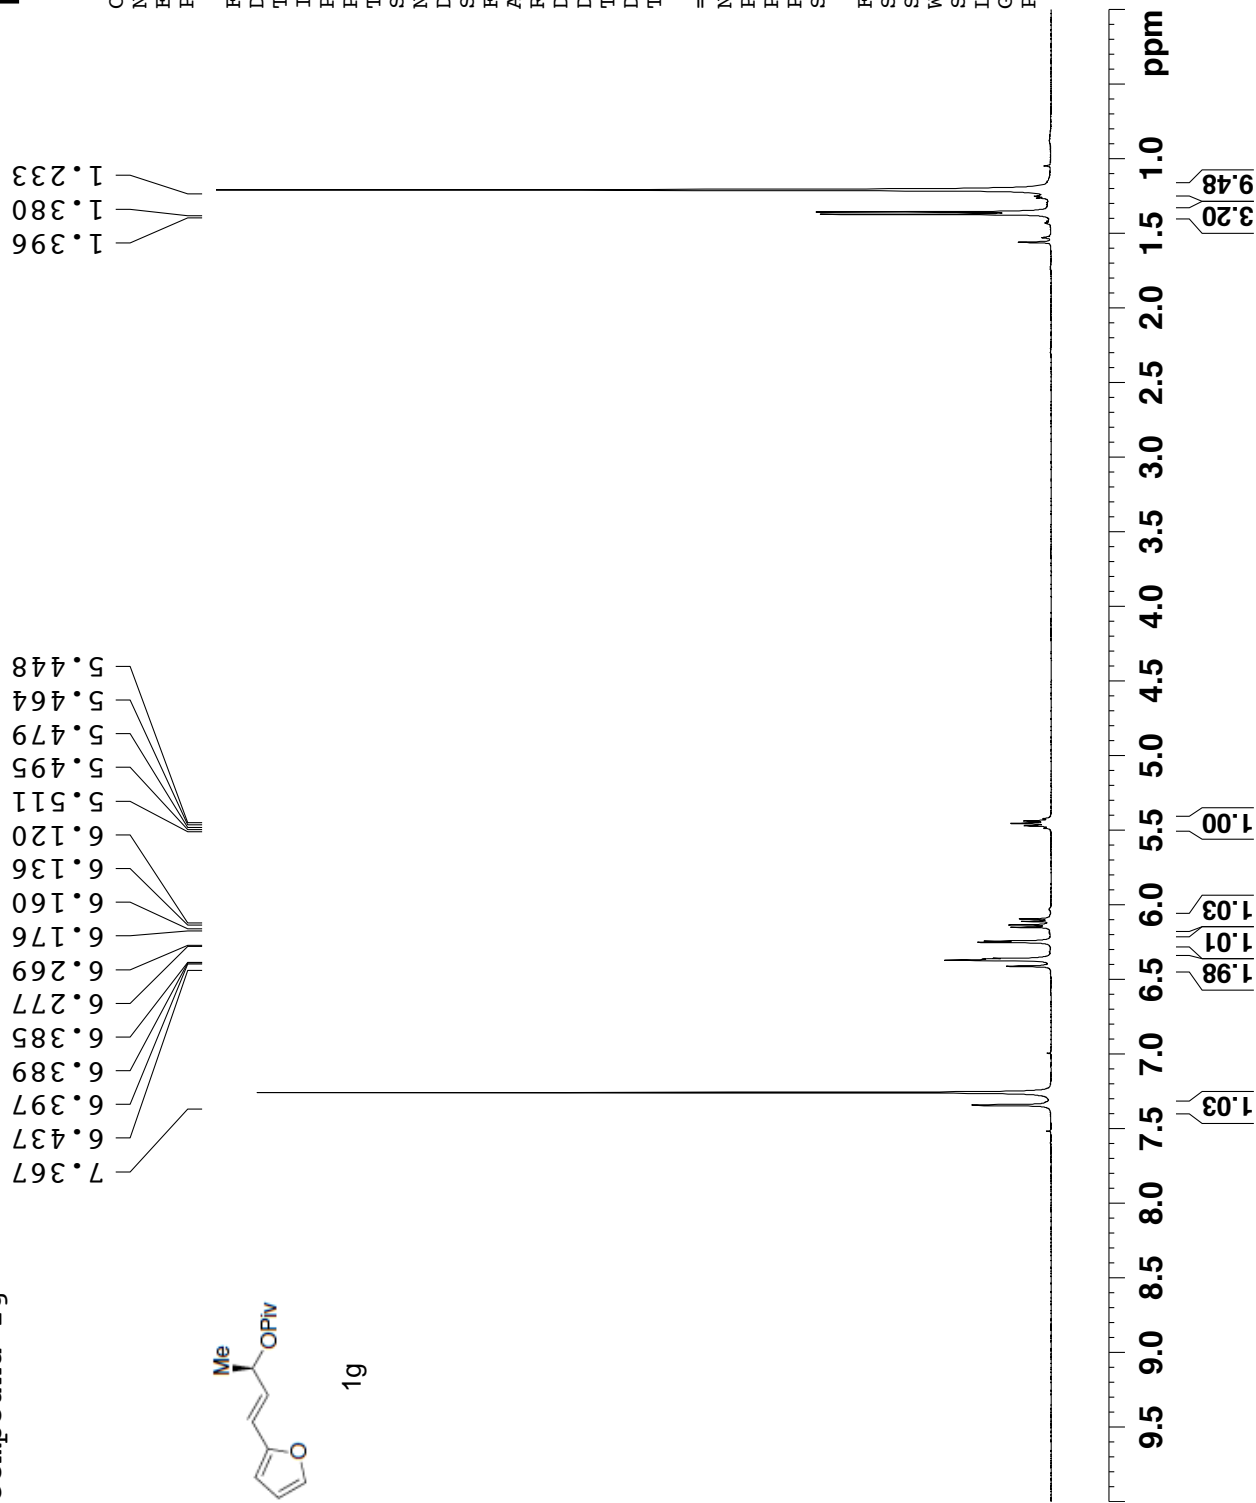



compound 1g

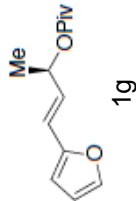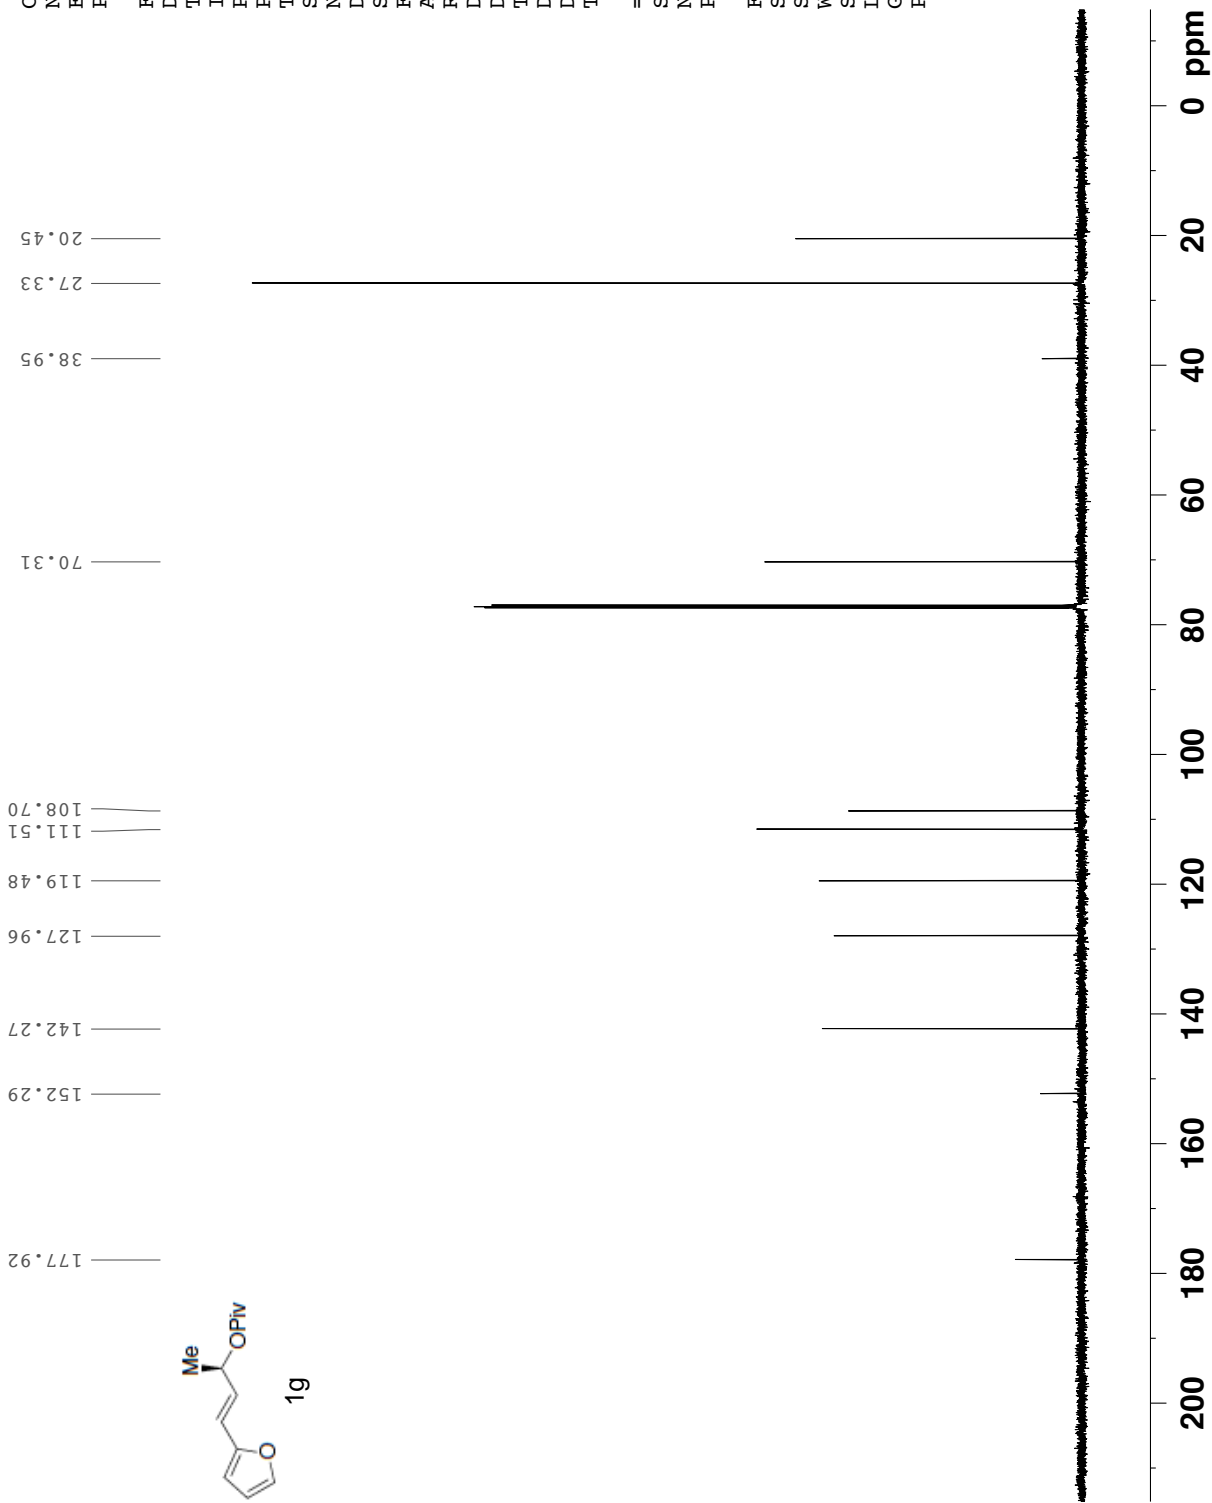

Current Data Parameters  
NAME QZ-3-242-1  
EXPNO 2  
PROCNO 1

F2 - Acquisition Parameters  
Date\_ 20130620  
Time\_ 15.33  
INSTRUM spect  
PROBHD 5 mm PABBO BB/  
PULPROG zgpg55  
TD 65536  
SOLVENT CDC13  
NS 256  
DS 4  
SWH 34722.223 Hz  
FIDRES 0.529819 Hz  
AQ 0.9437684 sec  
RG 2050  
DW 14.400 usec  
DE 19.34 usec  
TE 298.0 K  
D1 1.10000002 sec  
D11 0.03000000 sec  
TD0 1

==== CHANNEL f1 =====  
SF01 150.9656784 MHz  
NUC1 13C  
P1 10.63 usec

F2 - Processing parameters  
SI 32768  
SF 150.9505582 MHz  
WDW EM  
SSB 0  
LB 1.00 Hz  
GB 0  
PC 1.40



compound 1h

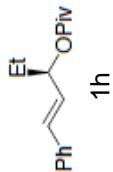

Current Data Parameters  
NAME QZ-4-015  
EXPNO 1  
PROCNO 1

F2 - Acquisition Parameters  
Date\_ 20130612  
Time\_ 16.23  
INSTRUM spect  
PROBHD 5 mm PABBO BB/  
PULPROG zg30  
TD 65536  
SOLVENT CDC13  
NS 8  
DS 2  
SWH 8403.361 Hz  
FIDRES 0.128225 Hz  
AQ 3.8994420 sec  
RG 114  
DW 59.500 usec  
DE 17.39 usec  
TE 298.0 K  
D1 1.00000000 sec  
TD0 1

==== CHANNEL f1 =====  
SFO1 600.3233018 MHz  
NUC1 1H  
P1 10.77 usec

F2 - Processing parameters  
SI 65536  
SF 600.3200161 MHz  
WDW EM  
SSB 0  
LB 0.30 Hz  
GB 0  
PC 1.00

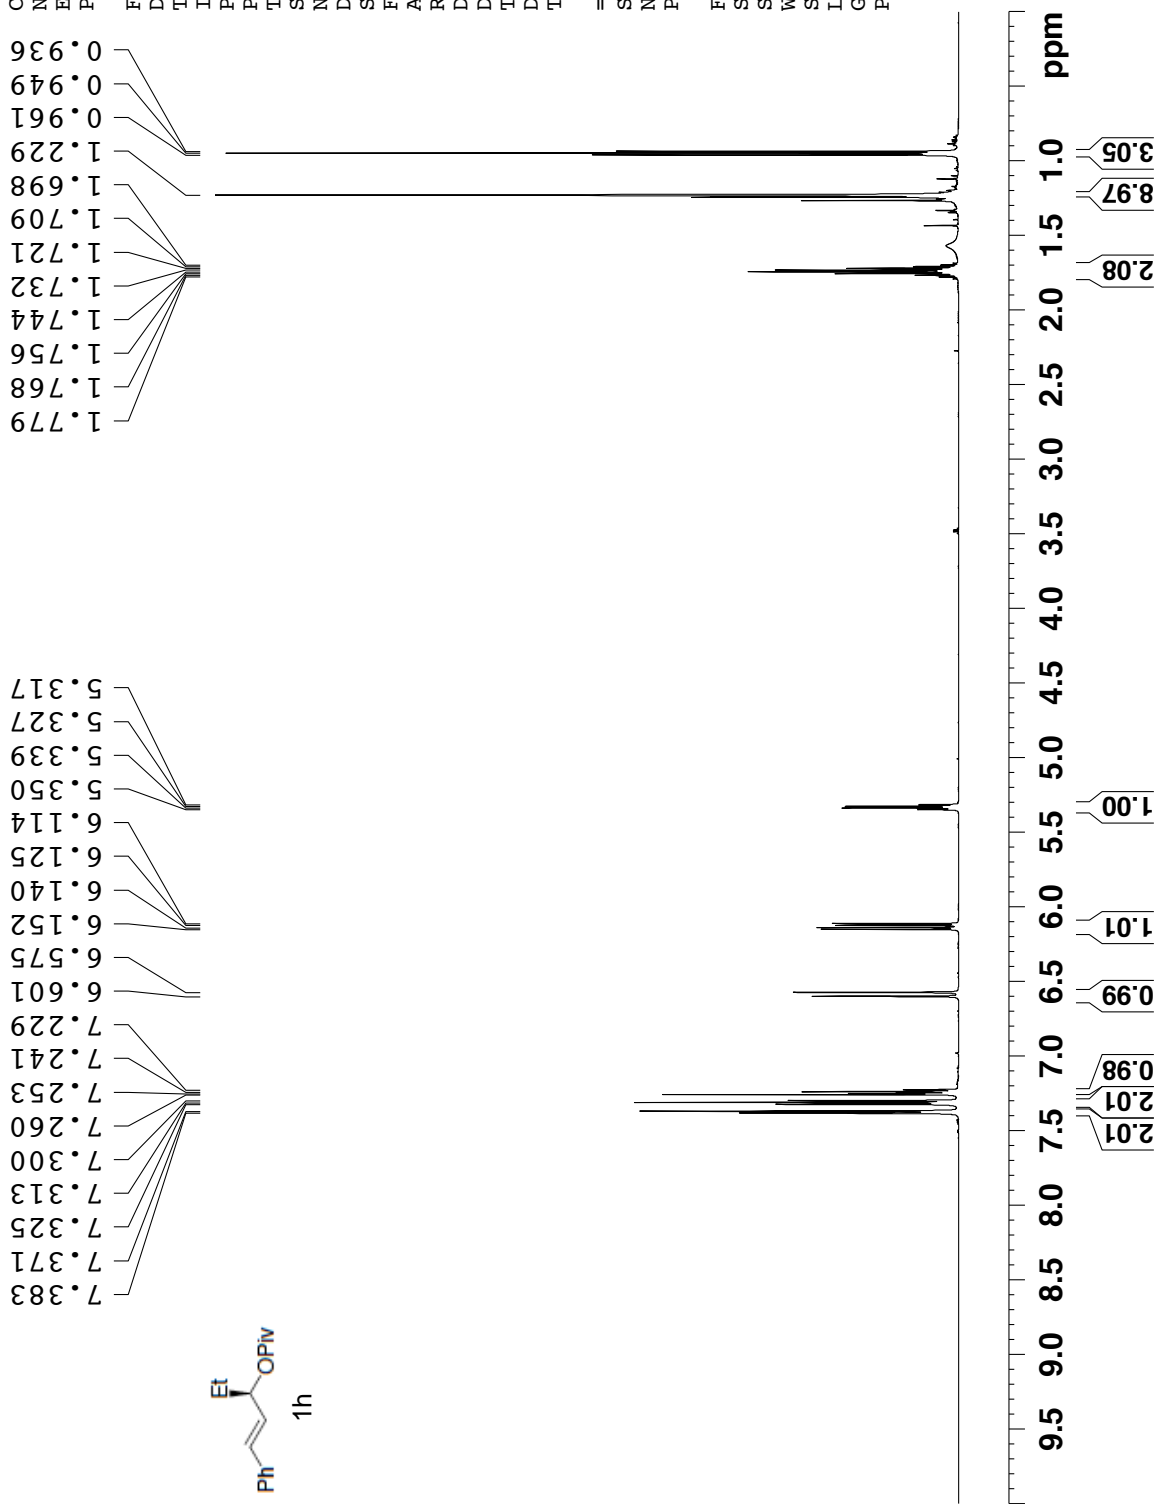



compound 1h

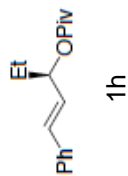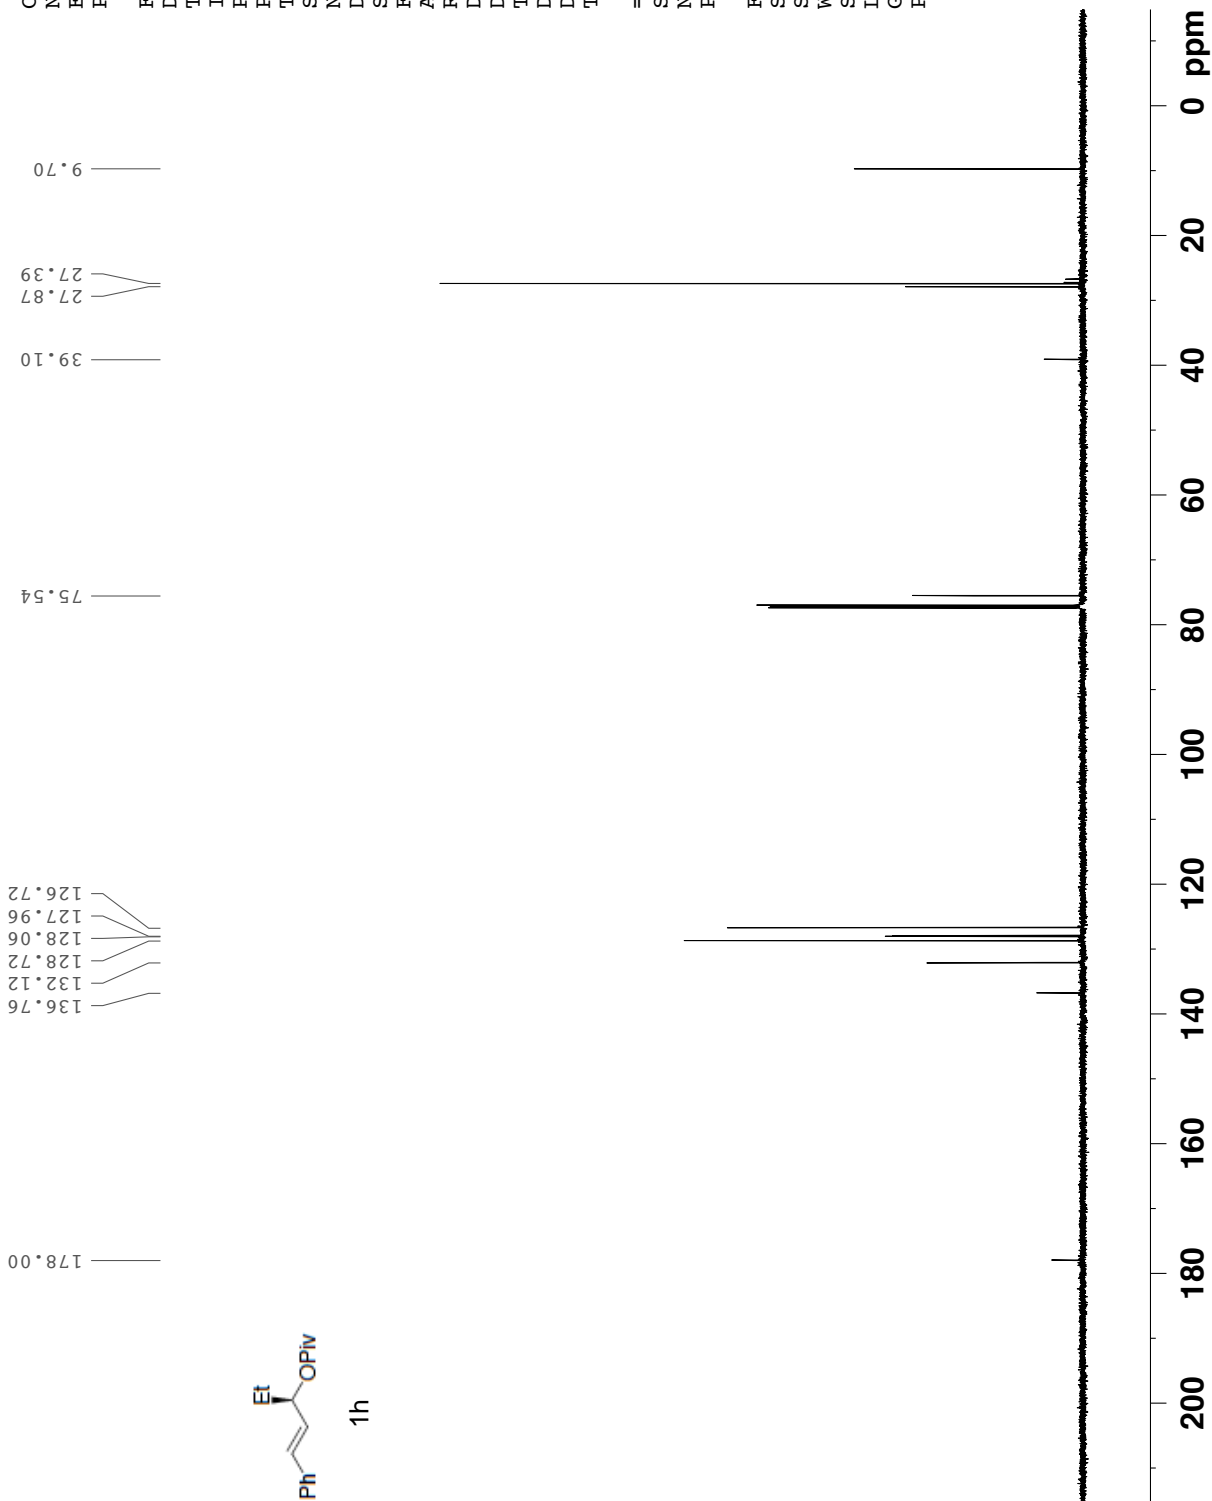

Current Data Parameters  
NAME QZ-4-015  
EXPNO 2  
PROCNO 1

F2 - Acquisition Parameters  
Date\_ 20130612  
Time\_ 16.33  
INSTRUM spect  
PROBHD 5 mm PABBO BB/  
PULPROG zgpg55  
TD 65536  
SOLVENT CDCl3  
NS 256  
DS 4  
SWH 34722.223 Hz  
FIDRES 0.529819 Hz  
AQ 0.9437684 sec  
RG 2050  
DW 14.400 usec  
DE 19.34 usec  
TE 298.0 K  
D1 1.10000002 sec  
D11 0.03000000 sec  
TD0 1

==== CHANNEL f1 =====  
SF01 150.9656784 MHz  
NUC1 13C  
P1 10.63 usec

F2 - Processing parameters  
SI 32768  
SF 150.9505582 MHz  
WDW EM  
SSB 0  
LB 1.00 Hz  
GB 0  
PC 1.40



compound 1i

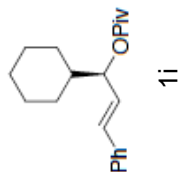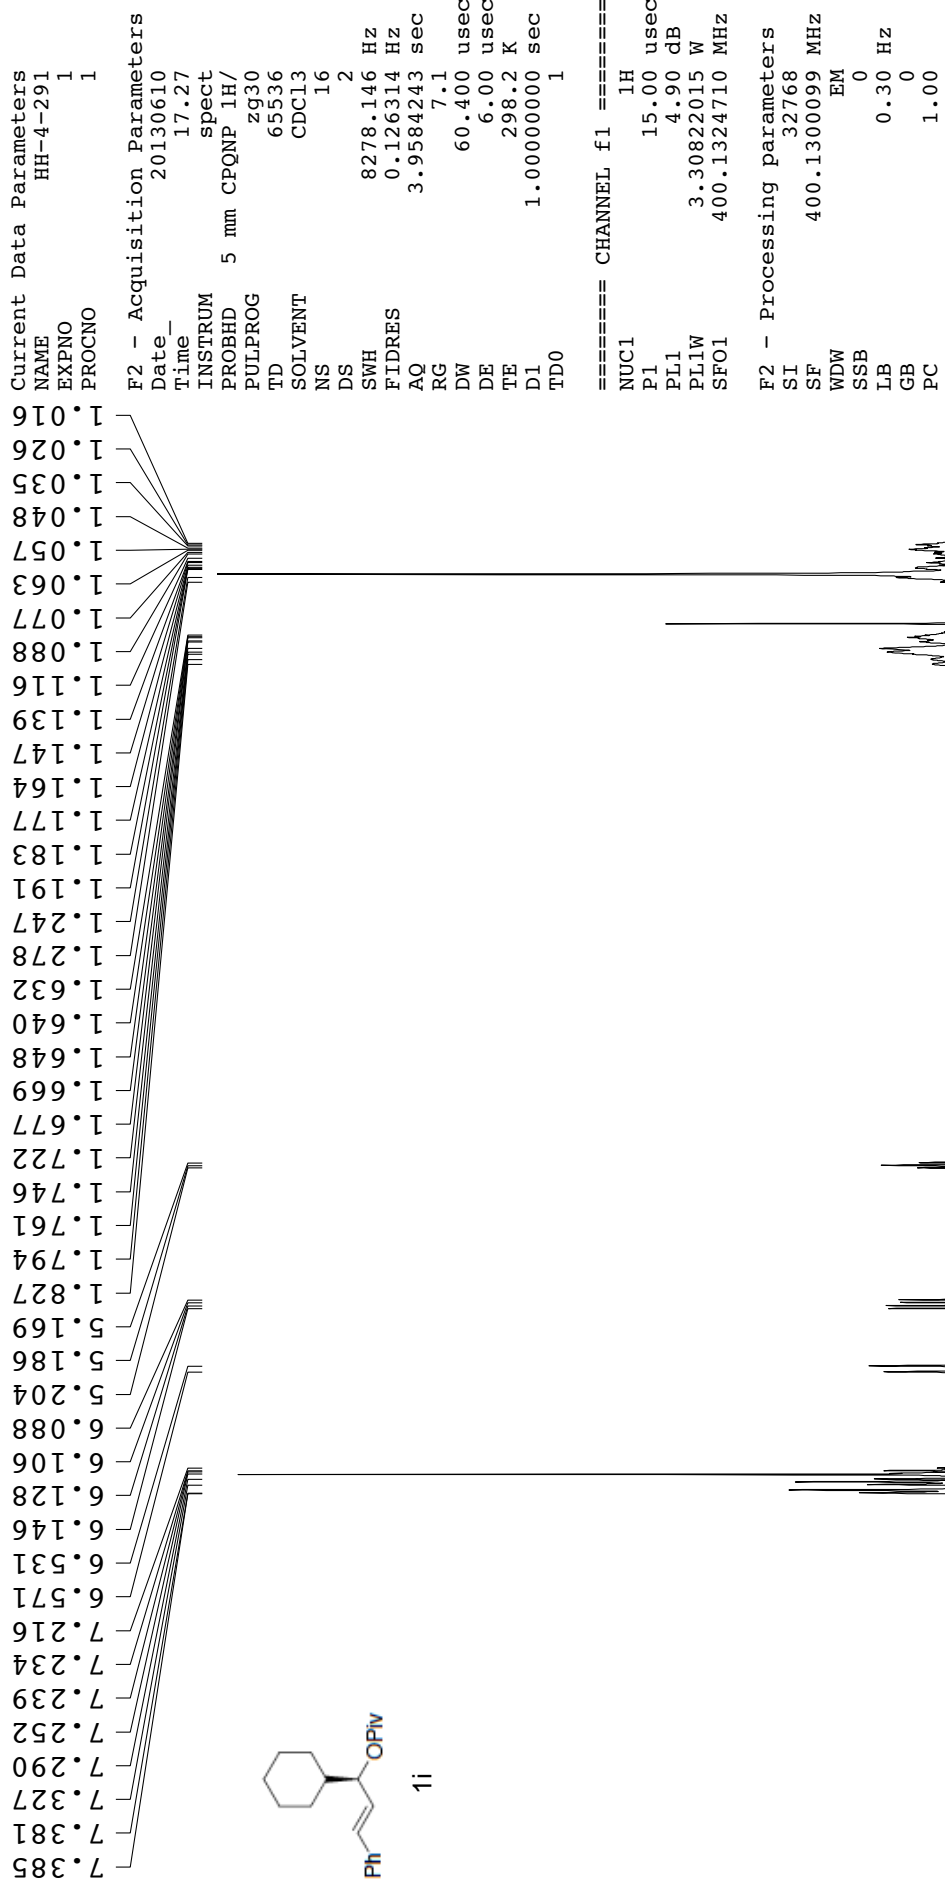



compound 1i

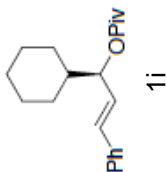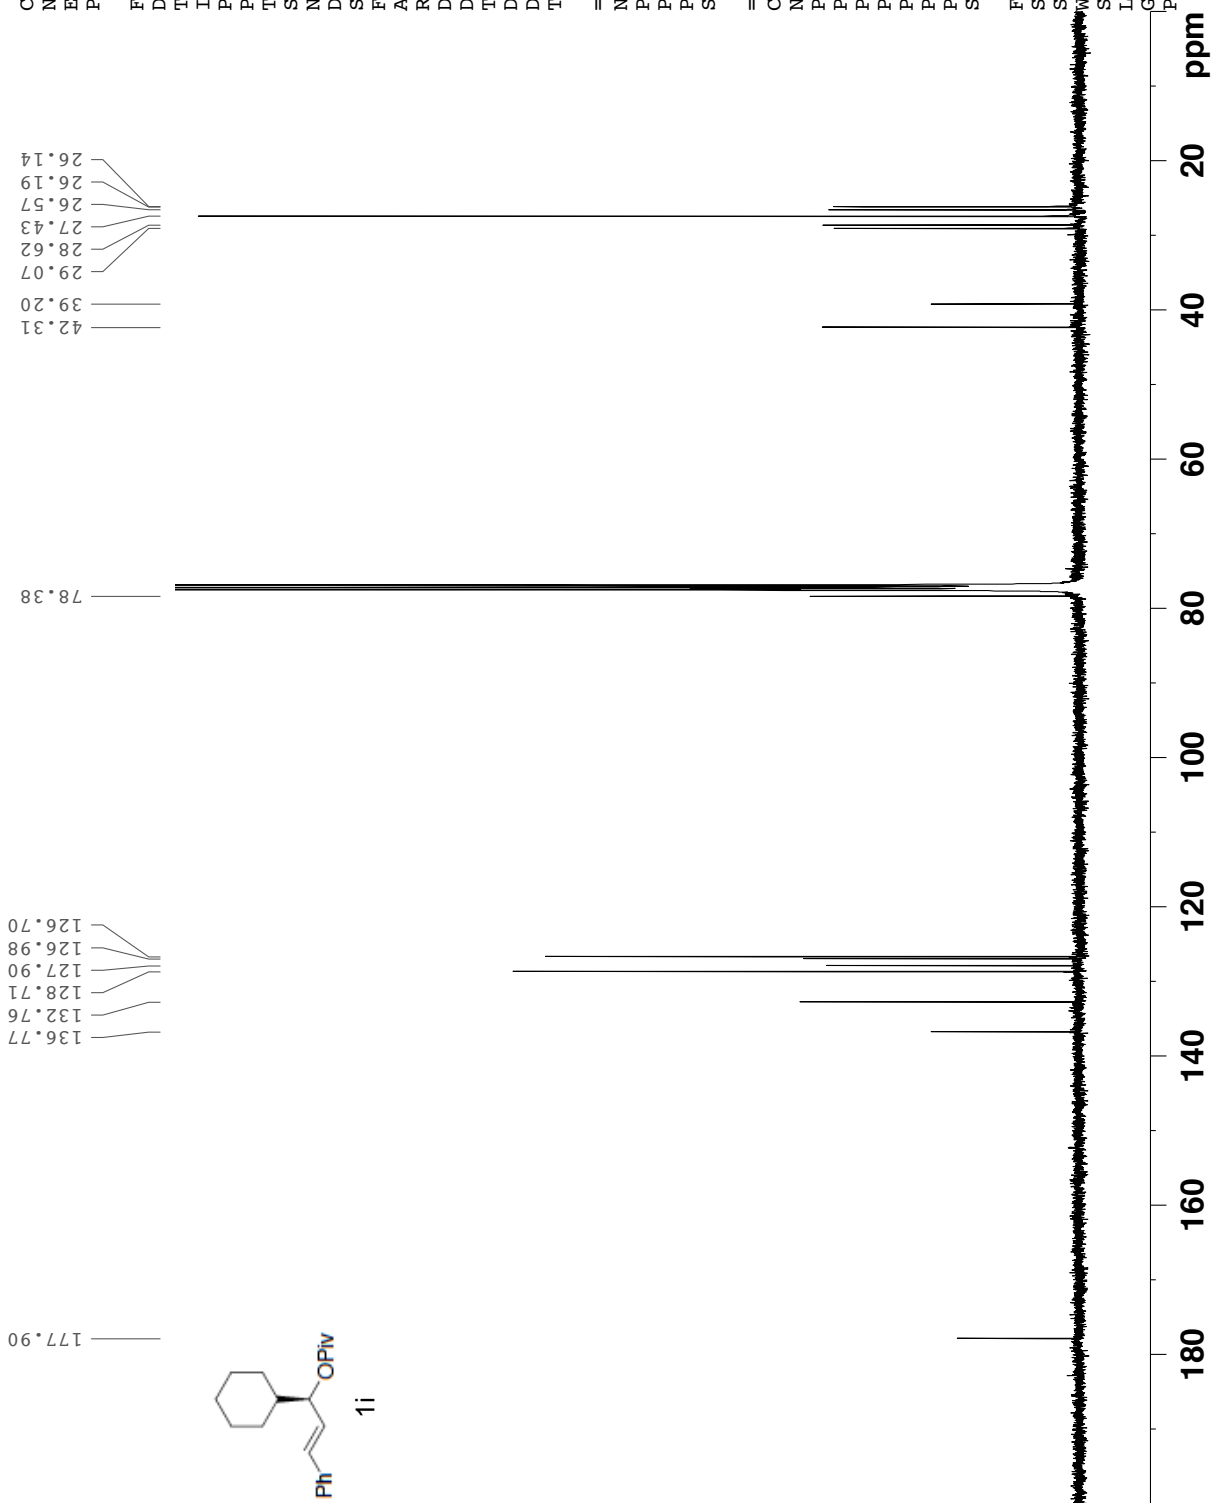

Current Data Parameters  
NAME HH-4-291  
EXPNO 2  
PROCNO 1

F2 - Acquisition Parameters

Date\_ 20130611  
Time 0.35  
INSTRUM spect  
PROBHD 5 mm CPQNP 1H/  
PULPROG zgpg30  
TD 65536  
SOLVENT CDC13  
NS 1024  
DS 4  
SWH 23980.814 Hz  
FIDRES 0.365918 Hz  
AQ 1.3664756 sec  
RG 512  
DW 20.850 usec  
DE 18.00 usec  
TE 298.2 K  
D1 2.00000000 sec  
D11 0.03000000 sec  
TD0 1

==== CHANNEL f1 =====  
NUC1 13C  
P1 9.25 usec  
PL1 0.55 dB  
PL1W 35.18820572 W  
SFO1 100.6228298 MHz

==== CHANNEL f2 =====  
CPDPRG2 waltz16  
NUC2 1H  
PCPD2 90.00 usec  
PL2 4.90 dB  
PL12 20.46 dB  
PL13 21.00 dB  
PL2W 3.30822015 W  
PL12W 0.09195905 W  
PL13W 0.08120718 W  
SFO2 400.1316005 MHz

F2 - Processing parameters  
SI 32768  
SF 100.6127524 MHz  
WDW EM  
SSB 0  
LB 1.00 Hz  
GB 0  
PC 1.40

compound S-1e 1H NMR



1.647  
1.397  
1.386

4.544  
4.535  
4.525

7.605  
7.591  
7.460  
7.447  
6.615  
6.589  
6.411  
6.401  
6.384  
6.375

Current Data Parameters  
NAME QZ-HH-5-090-2  
EXPNO 1  
PROCNO 1

F2 - Acquisition Parameters  
Date\_ 20140220  
Time\_ 16.42  
INSTRUM spect  
PROBHD 5 mm PABBO BB/  
PULPROG zg30  
TD 65536  
SOLVENT CDC13  
NS 8  
DS 2  
SWH 8403.361 Hz  
FIDRES 0.128225 Hz  
AQ 3.8994420 sec  
RG 181  
DW 59.500 usec  
DE 17.39 usec  
TE 298.0 K  
D1 1.00000000 sec  
TD0 1

==== CHANNEL f1 =====  
SFO1 600.323018 MHz  
NUC1 1H  
P1 10.77 usec

F2 - Processing parameters  
SI 65536  
SF 600.3200135 MHz  
WDW EM  
SSB 0  
LB 0.30 Hz  
GB 0  
PC 1.00

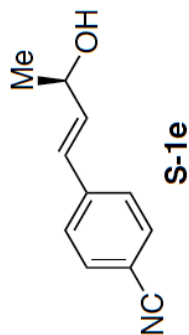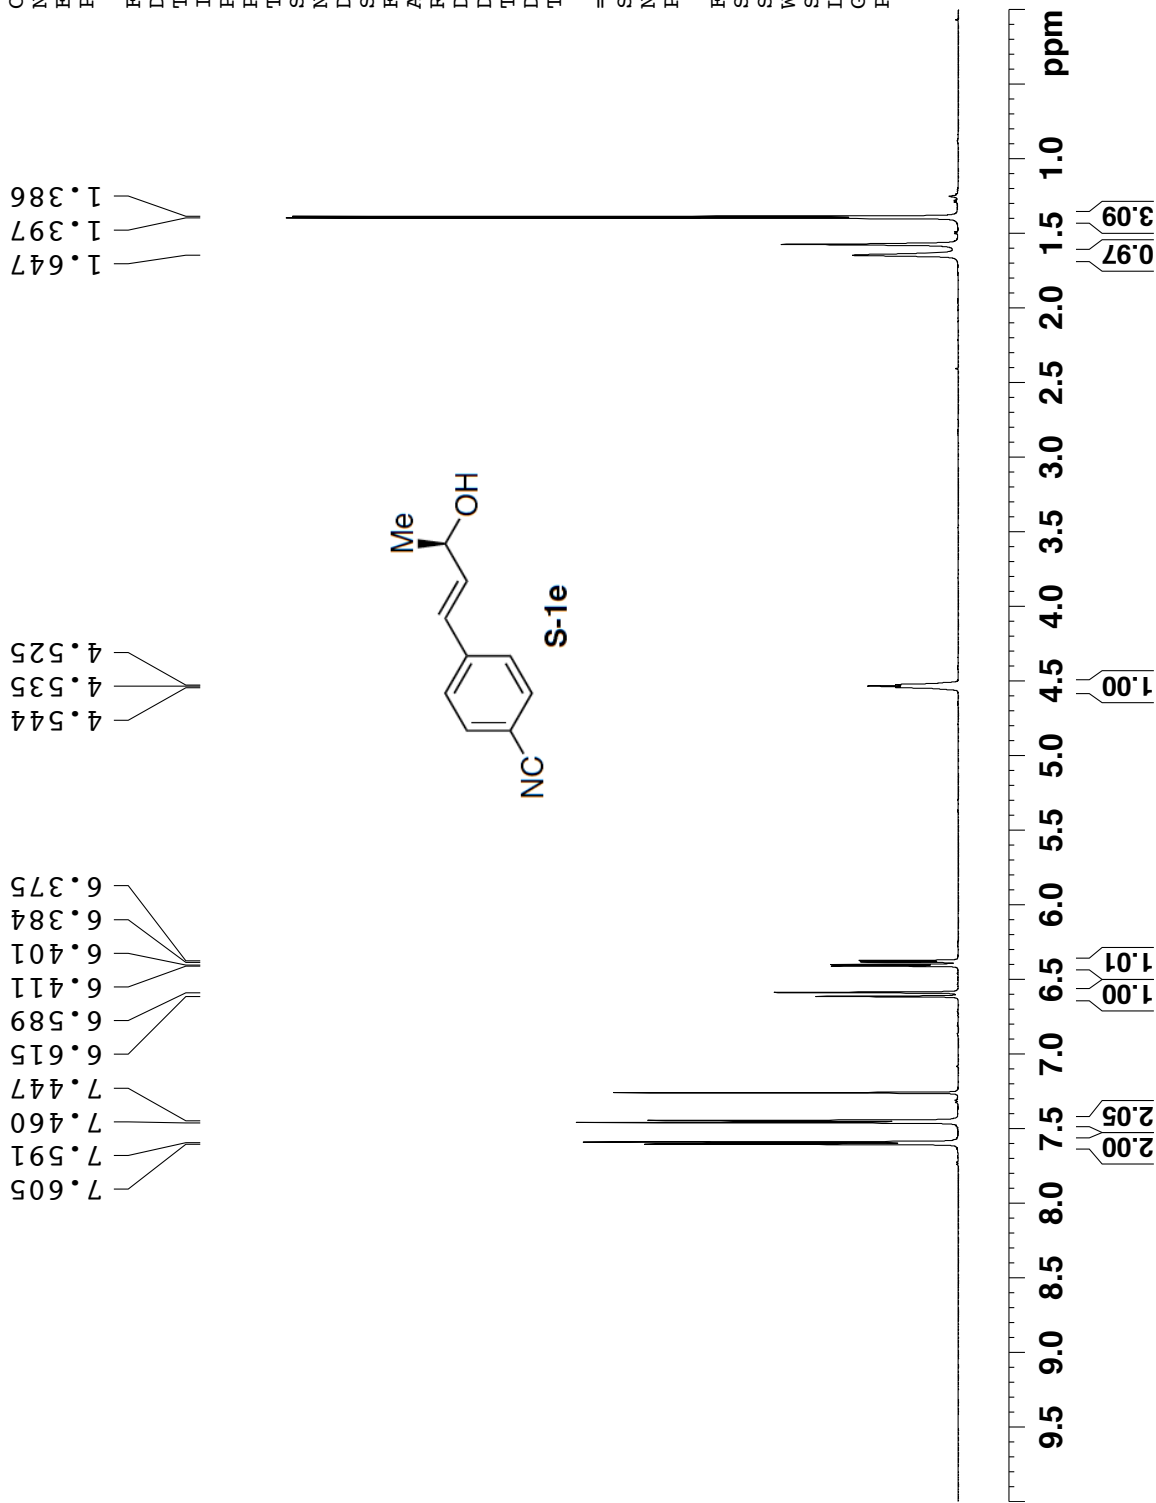



compound S-1e 13CNMR

Current Data Parameters  
NAME QZ-HH-5-090-2  
EXPNO 2  
PROCNO 1

F2 - Acquisition Parameters  
Date\_ 20140220  
Time\_ 17.00  
INSTRUM spect  
PROBHD 5 mm PABBO BB/  
PULPROG zgpg55  
TD 65536  
SOLVENT CDCl3  
NS 256  
DS 4  
SWH 34722.223 Hz  
FIDRES 0.529819 Hz  
AQ 0.9437684 sec  
RG 2050  
DW 14.400 usec  
DE 19.34 usec  
TE 298.0 K  
D1 1.10000002 sec  
D11 0.03000000 sec  
TD0 1

==== CHANNEL f1 =====  
SF01 150.9656784 MHz  
NUC1 13C  
P1 10.63 usec

F2 - Processing parameters  
SI 32768  
SF 150.9505634 MHz  
WDW EM  
SSB 0  
LB 1.00 Hz  
GB 0  
PC 1.40

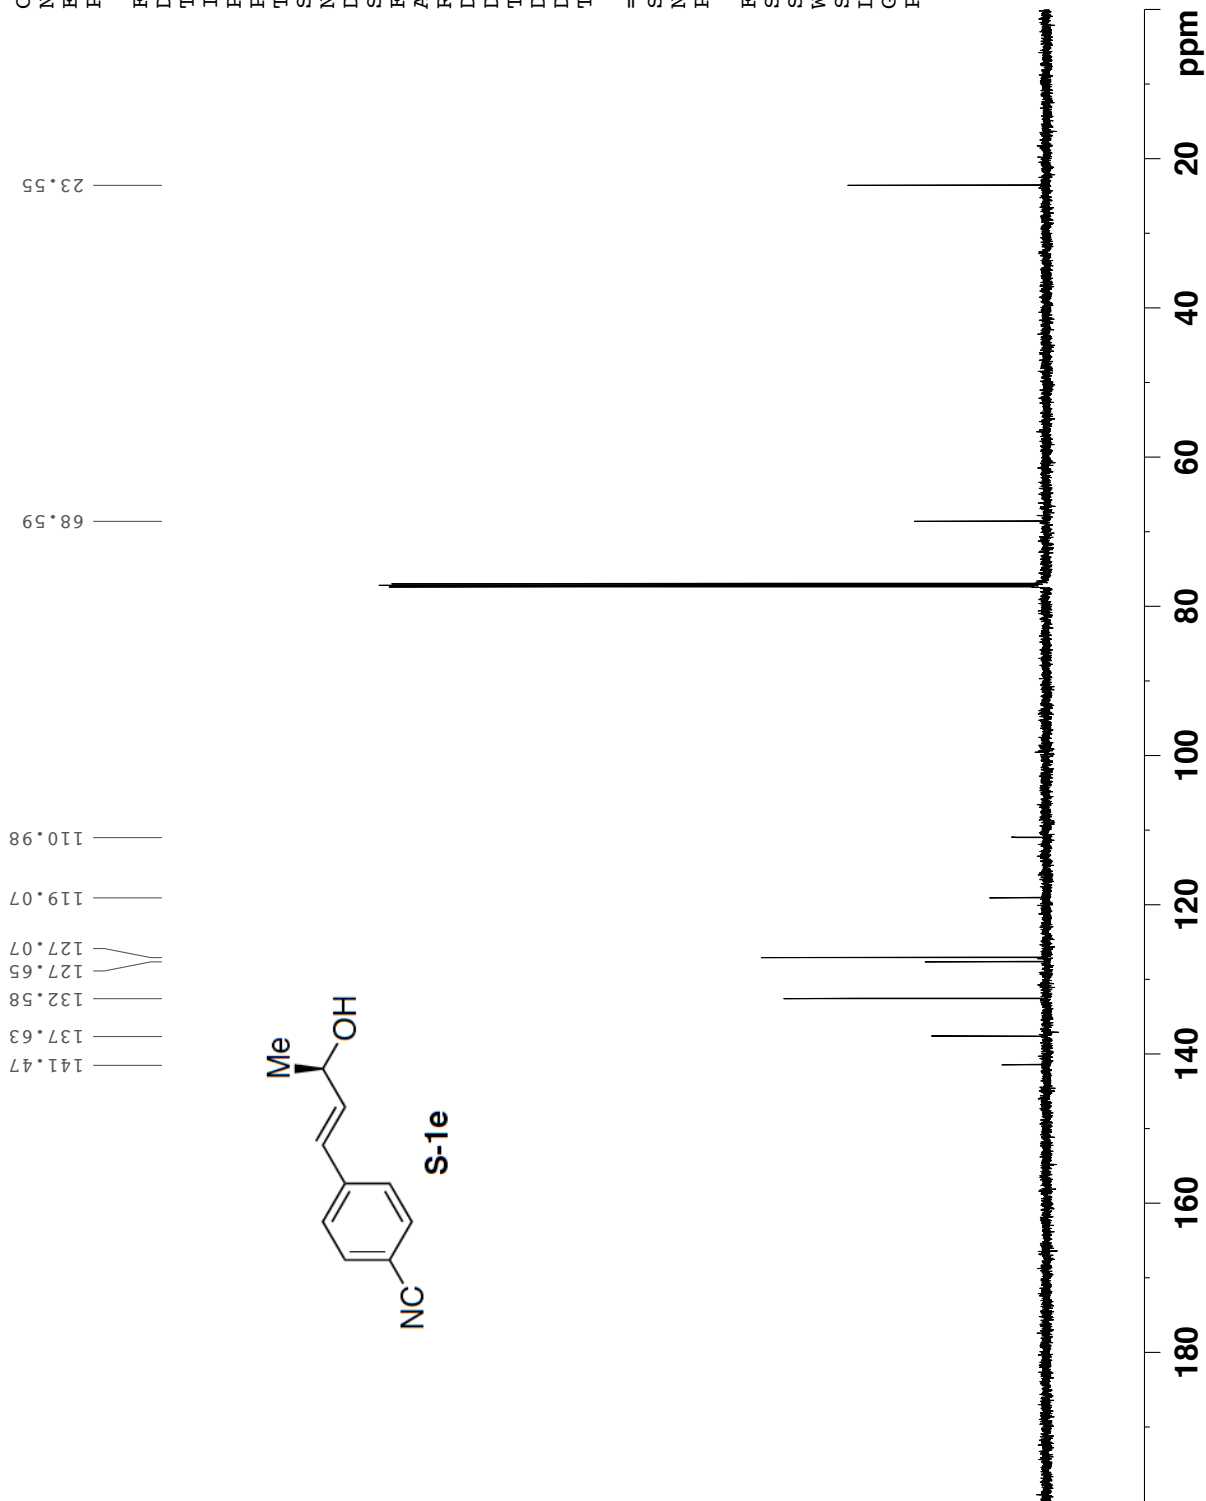



compound 25 1HNMR

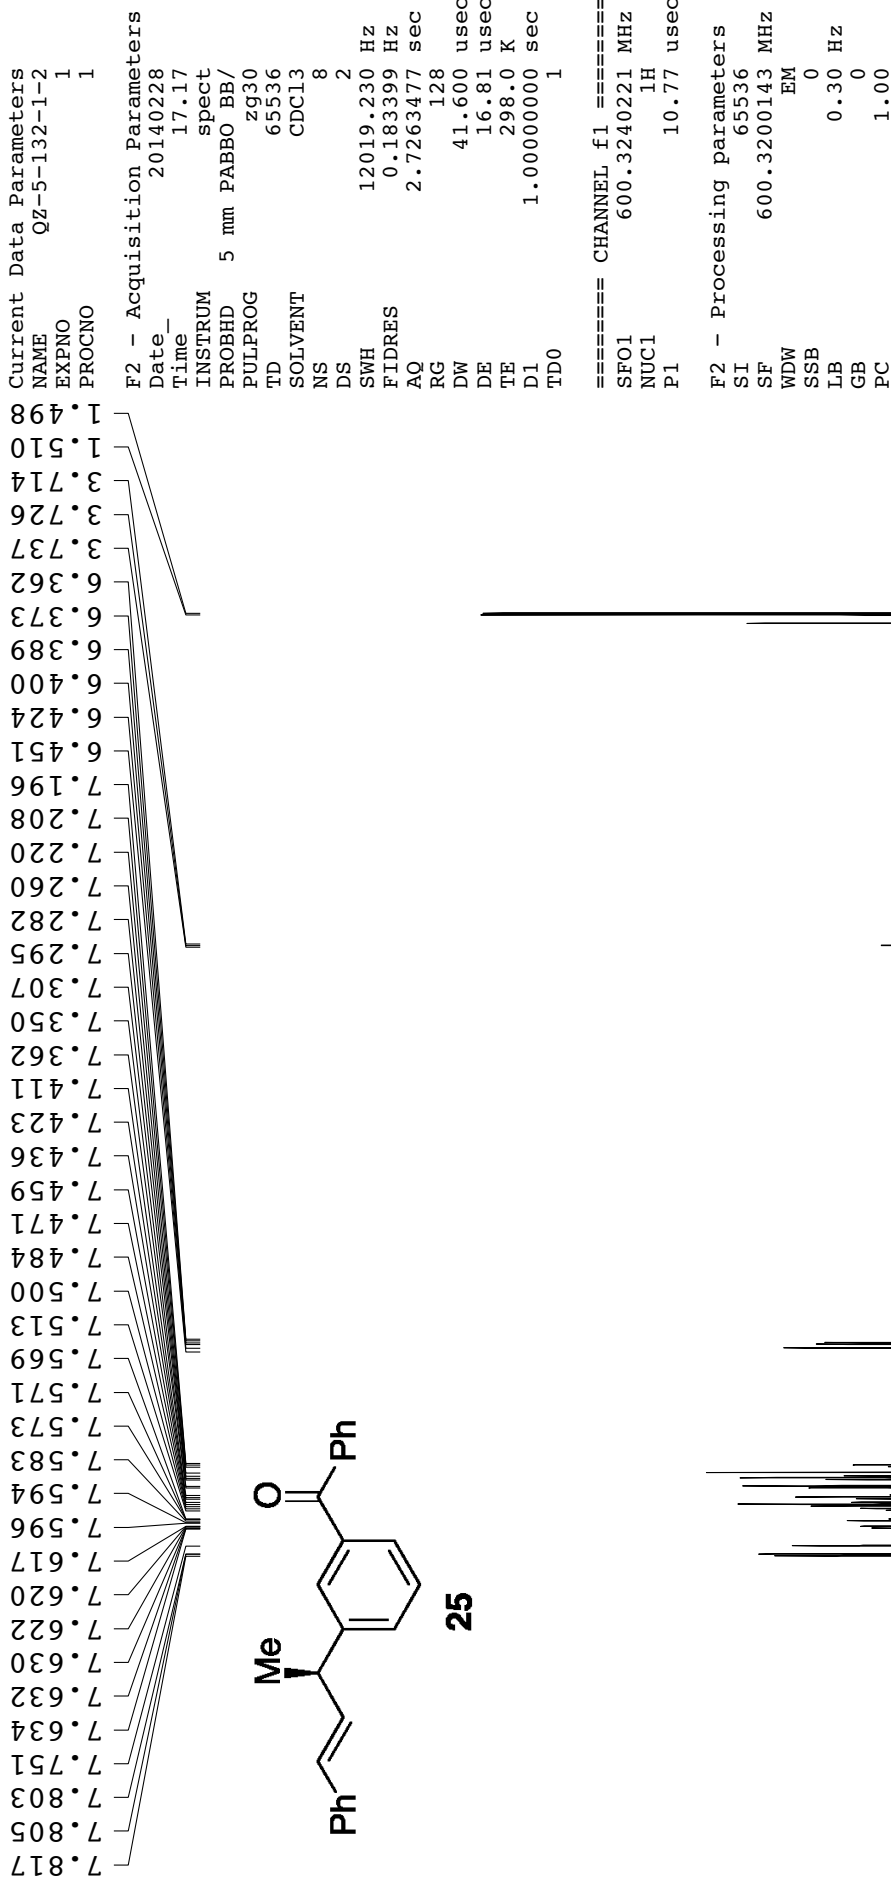





compound 25 13CNMR

196.97  
146.17  
137.95  
137.84  
137.46  
134.68  
132.52  
131.61  
130.22  
129.23  
128.99  
128.66  
128.48  
128.38  
127.36  
126.32

42.65  
21.31

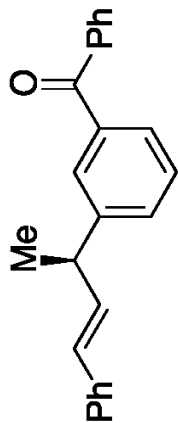

F2 - Acquisition Parameters

Date\_ 20140228  
Time\_ 17.27  
INSTRUM spect  
PROBHD 5 mm PABBO BB/  
PULPROG zgpg55  
TD 65536  
SOLVENT CDCl3  
NS 256  
DS 4  
SWH 34722.223 Hz  
FIDRES 0.529819 Hz  
AQ 0.9437684 sec  
RG 2050  
DW 14.400 usec  
DE 19.34 usec  
TE 298.0 K  
D1 1.10000002 sec  
D11 0.03000000 sec  
TD0 1

==== CHANNEL f1 =====  
SF01 150.9656784 MHz  
NUC1 13C  
P1 10.63 usec

F2 - Processing parameters

SI 32768  
SF 150.9505662 MHz  
WDW EM  
SSB 0  
LB 1.00 Hz  
GB 0  
PC 1.40

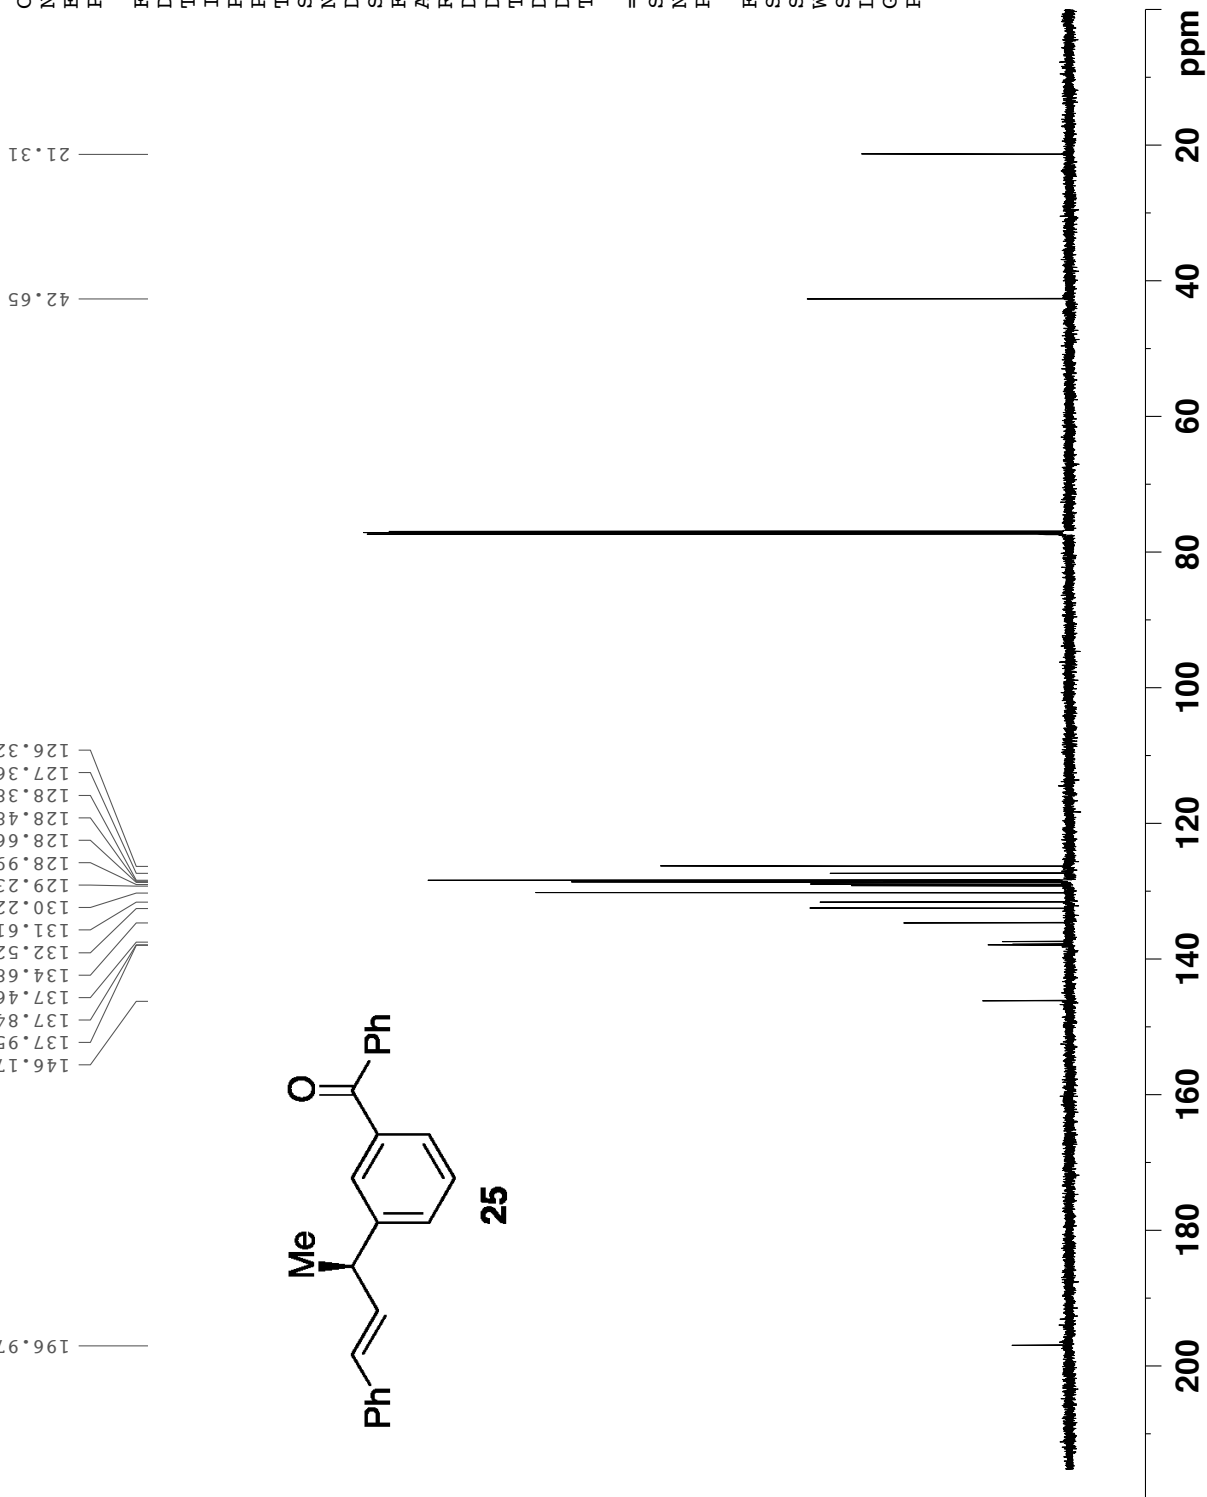



compound 26 1HNMR (S)-ketoprofen

7.801  
7.789  
7.787  
7.784  
7.698  
7.685  
7.601  
7.589  
7.577  
7.574  
7.559  
7.489  
7.476  
7.464  
7.452  
7.439

3.853  
3.841  
3.829  
3.817

1.570  
1.558

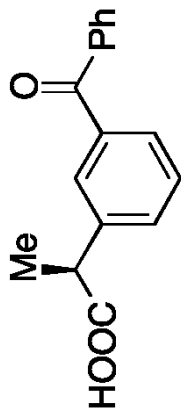

26, (S)-ketoprofen

Current Data Parameters  
NAME QZ-5-135-2-8  
EXPNO 1  
PROCNO 1

F2 - Acquisition Parameters  
Date\_ 20140305  
Time\_ 14.47  
INSTRUM spect  
PROBHD 5 mm PABBO BB/  
PULPROG zg30  
TD 65536  
SOLVENT CDCl3  
NS 8  
DS 2  
SWH 12019.230 Hz  
FIDRES 0.183399 Hz  
AQ 2.7263477 sec  
RG 203  
DW 41.600 usec  
DE 16.81 usec  
TE 298.0 K  
D1 1.00000000 sec  
TD0 1

==== CHANNEL f1 =====  
SFO1 600.3240221 MHz  
NUC1 1H  
P1 10.77 usec

F2 - Processing parameters  
SI 65536  
SF 600.3200135 MHz  
WDW EM  
SSB 0  
LB 0.30 Hz  
GB 0  
PC 1.00

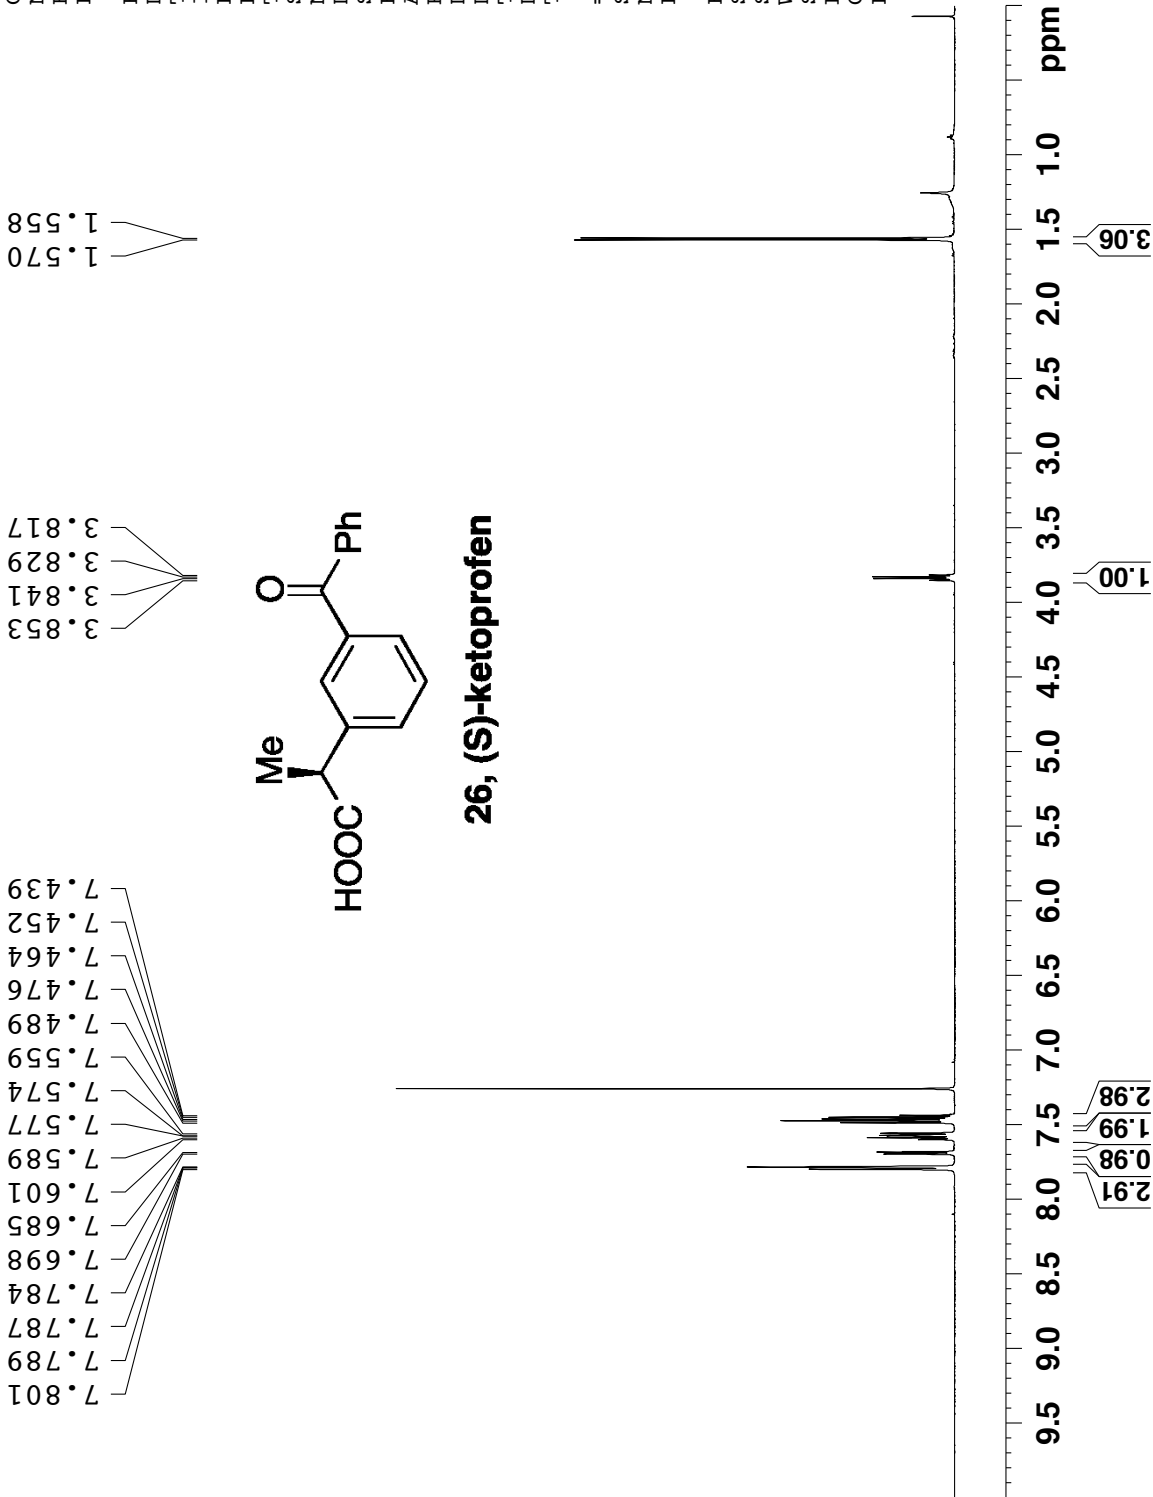



compound 26 <sup>13</sup>CNMR (S)-ketoprofen

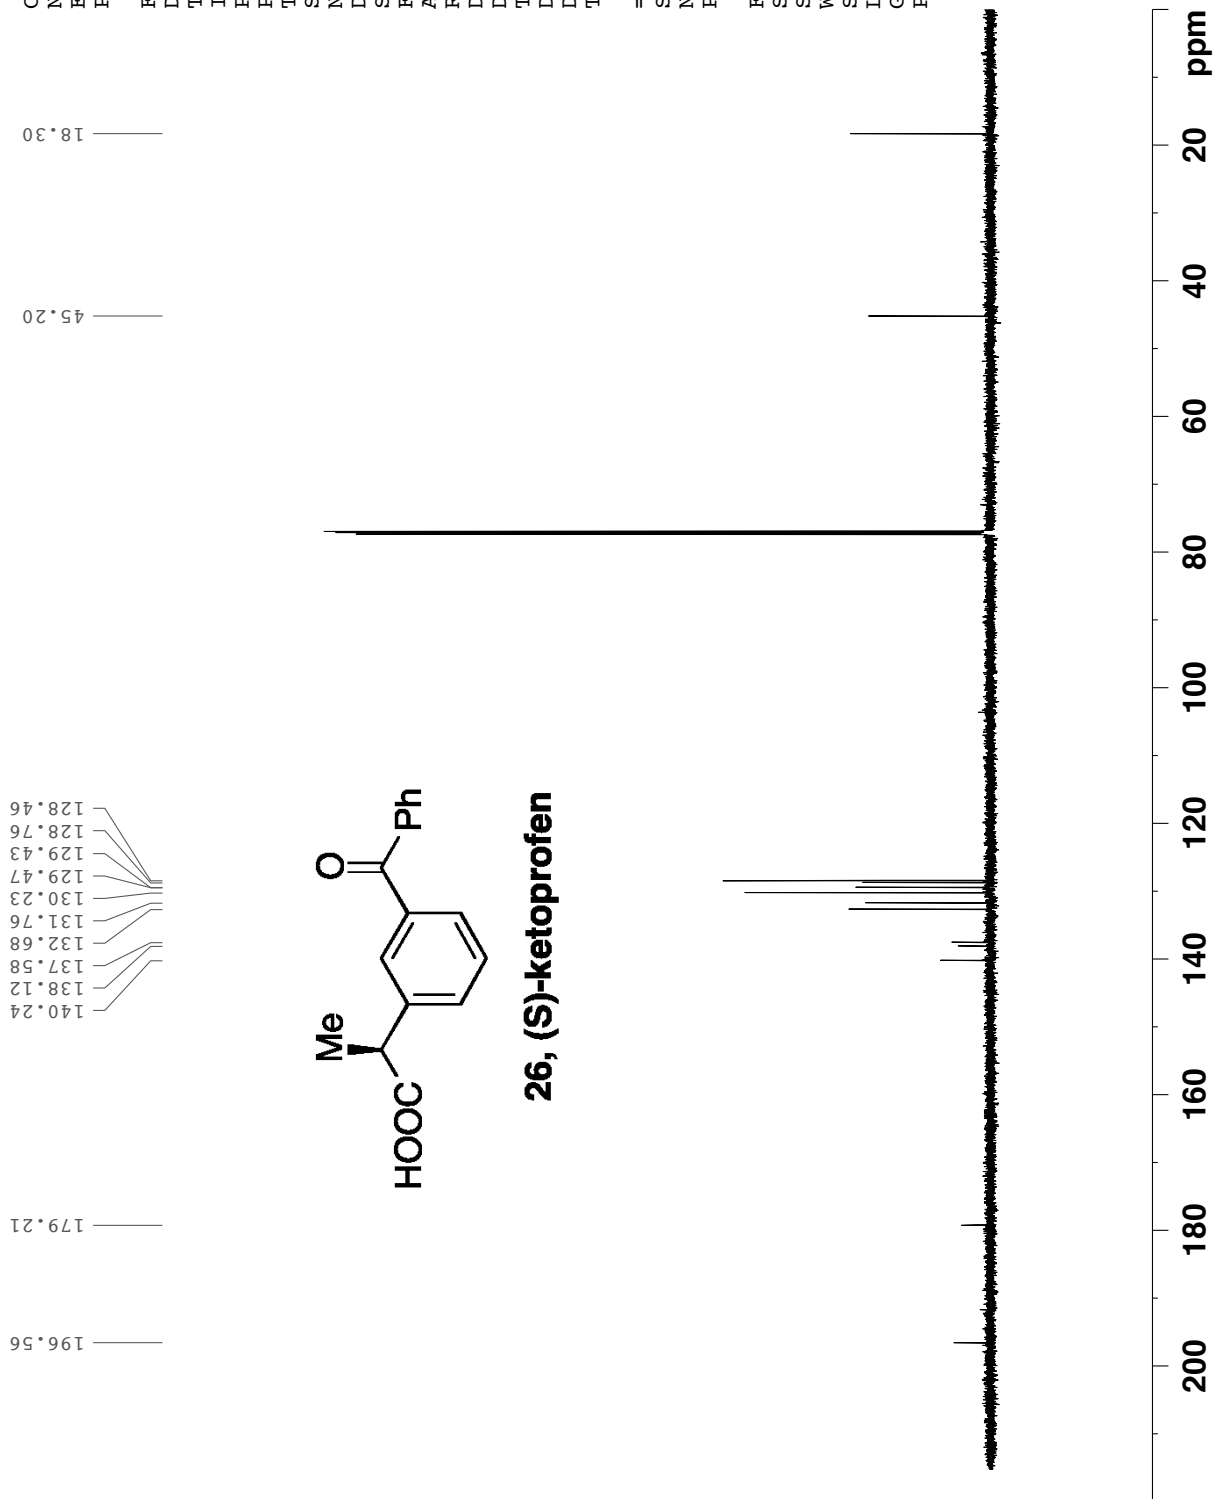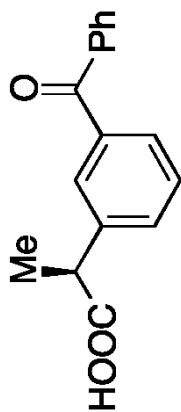

26, (S)-ketoprofen

Current Data Parameters  
NAME QZ-5-135-2-8  
EXPNO 2  
PROCNO 1

F2 - Acquisition Parameters  
Date\_ 20140305  
Time\_ 15.00  
INSTRUM spect  
PROBHD 5 mm PABBO BB/  
PULPROG zgpg55  
TD 65536  
SOLVENT CDC13  
NS 256  
DS 4  
SWH 34722.223 Hz  
FIDRES 0.529819 Hz  
AQ 0.9437684 sec  
RG 2050  
DW 14.400 usec  
DE 19.34 usec  
TE 298.0 K  
D1 1.10000002 sec  
D11 0.03000000 sec  
TD0 1

==== CHANNEL f1 =====  
SF01 150.9656784 MHz  
NUC1 13C  
P1 10.63 usec

F2 - Processing parameters  
SI 32768  
SF 150.9505633 MHz  
WDW EM  
SSB 0  
LB 1.00 Hz  
GB 0  
PC 1.40

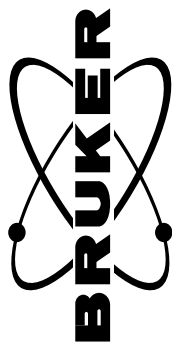

compound S-29 1HNMR

Current Data Parameters  
NAME QZ-5-137-1NEW  
EXPNO 1  
PROCNO 1

F2 - Acquisition Parameters  
Date\_ 20140318  
Time\_ 10.55  
INSTRUM spect  
PROBHD 5 mm PABBO BB/  
PULPROG zg30  
TD 65536  
SOLVENT CDCl3  
NS 8  
DS 2  
SWH 12019.230 Hz  
FIDRES 0.183399 Hz  
AQ 2.7263477 sec  
RG 128  
DW 41.600 usec  
DE 16.81 usec  
TE 298.0 K  
D1 1.00000000 sec  
TD0 1

==== CHANNEL f1 =====  
SFO1 600.3240221 MHz  
NUC1 1H  
P1 10.77 usec

F2 - Processing parameters  
SI 65536  
SF 600.3200135 MHz  
WDW EM  
SSB 0  
LB 0.30 Hz  
GB 0  
PC 1.00

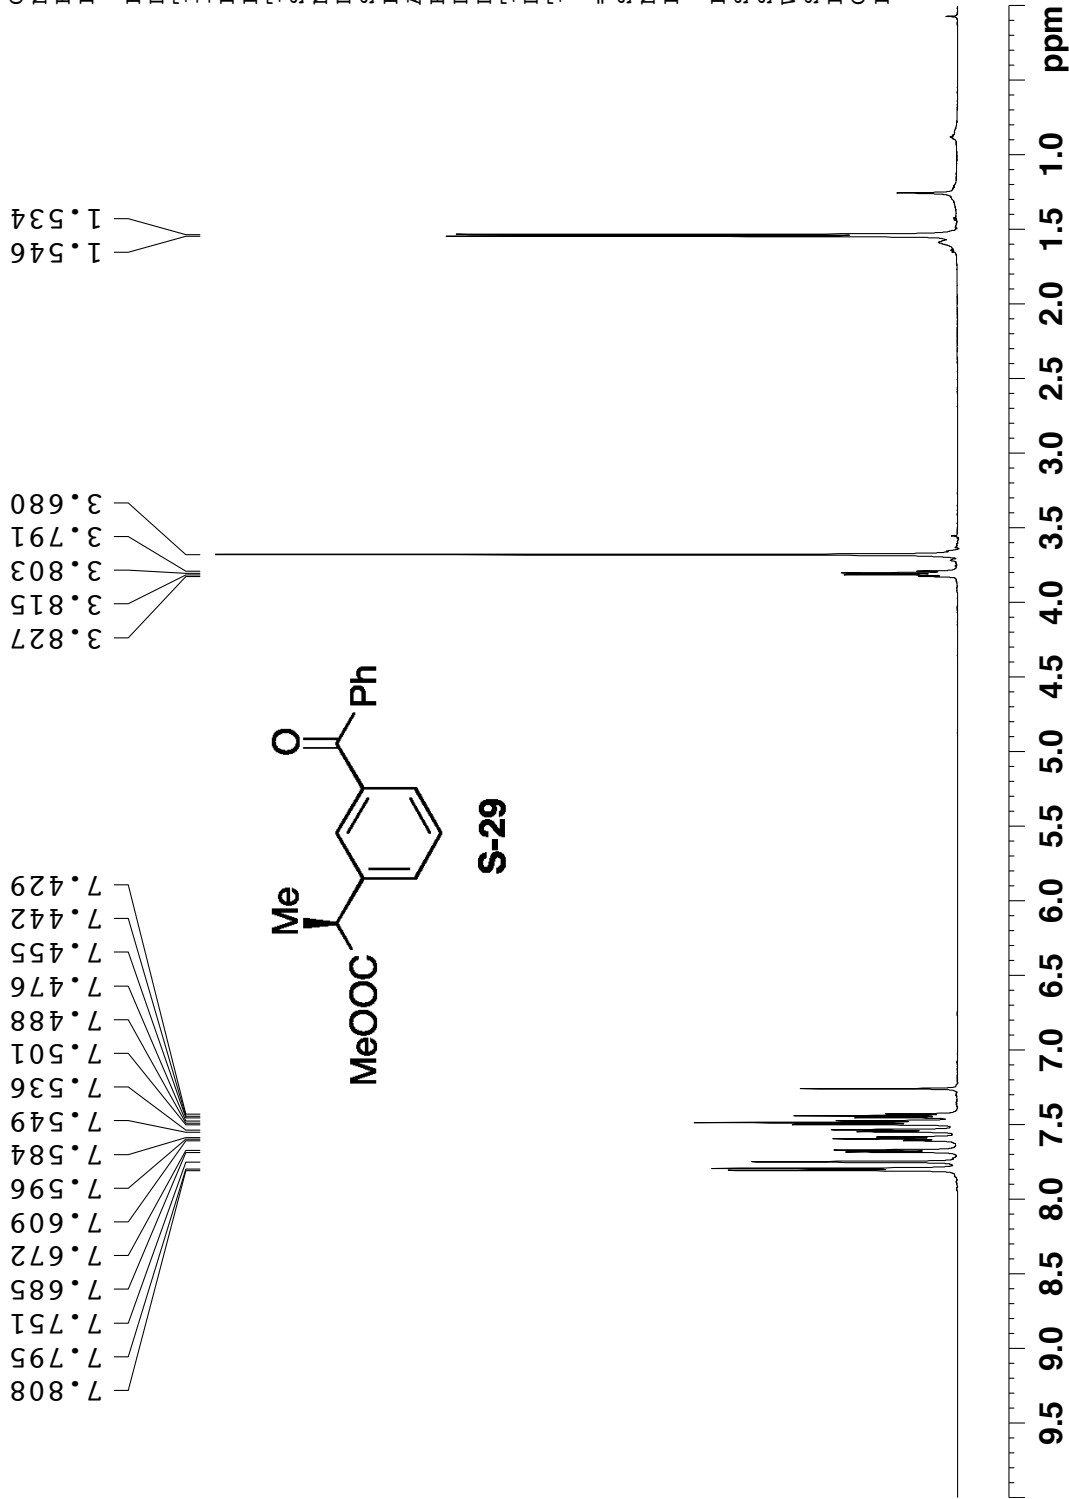



compound 31 13CNMR

Current Data Parameters  
NAME QZ-5-137-1NEW  
EXPNO 2  
PROCNO 1

F2 - Acquisition Parameters  
Date\_ 20140318  
Time\_ 11.05  
INSTRUM spect  
PROBHD 5 mm PABBO BB/  
PULPROG zgpg55  
TD 65536  
SOLVENT CDC13  
NS 256  
DS 4  
SWH 34722.223 Hz  
FIDRES 0.529819 Hz  
AQ 0.9437684 sec  
RG 2050  
DW 14.400 usec  
DE 19.34 usec  
TE 298.0 K  
D1 1.10000002 sec  
D11 0.03000000 sec  
TD0 1

==== CHANNEL f1 =====  
SF01 150.9656784 MHz  
NUC1 13C  
P1 10.63 usec

F2 - Processing parameters  
SI 32768  
SF 150.9505656 MHz  
WDW EM  
SSB 0  
LB 1.00 Hz  
GB 0  
PC 1.40

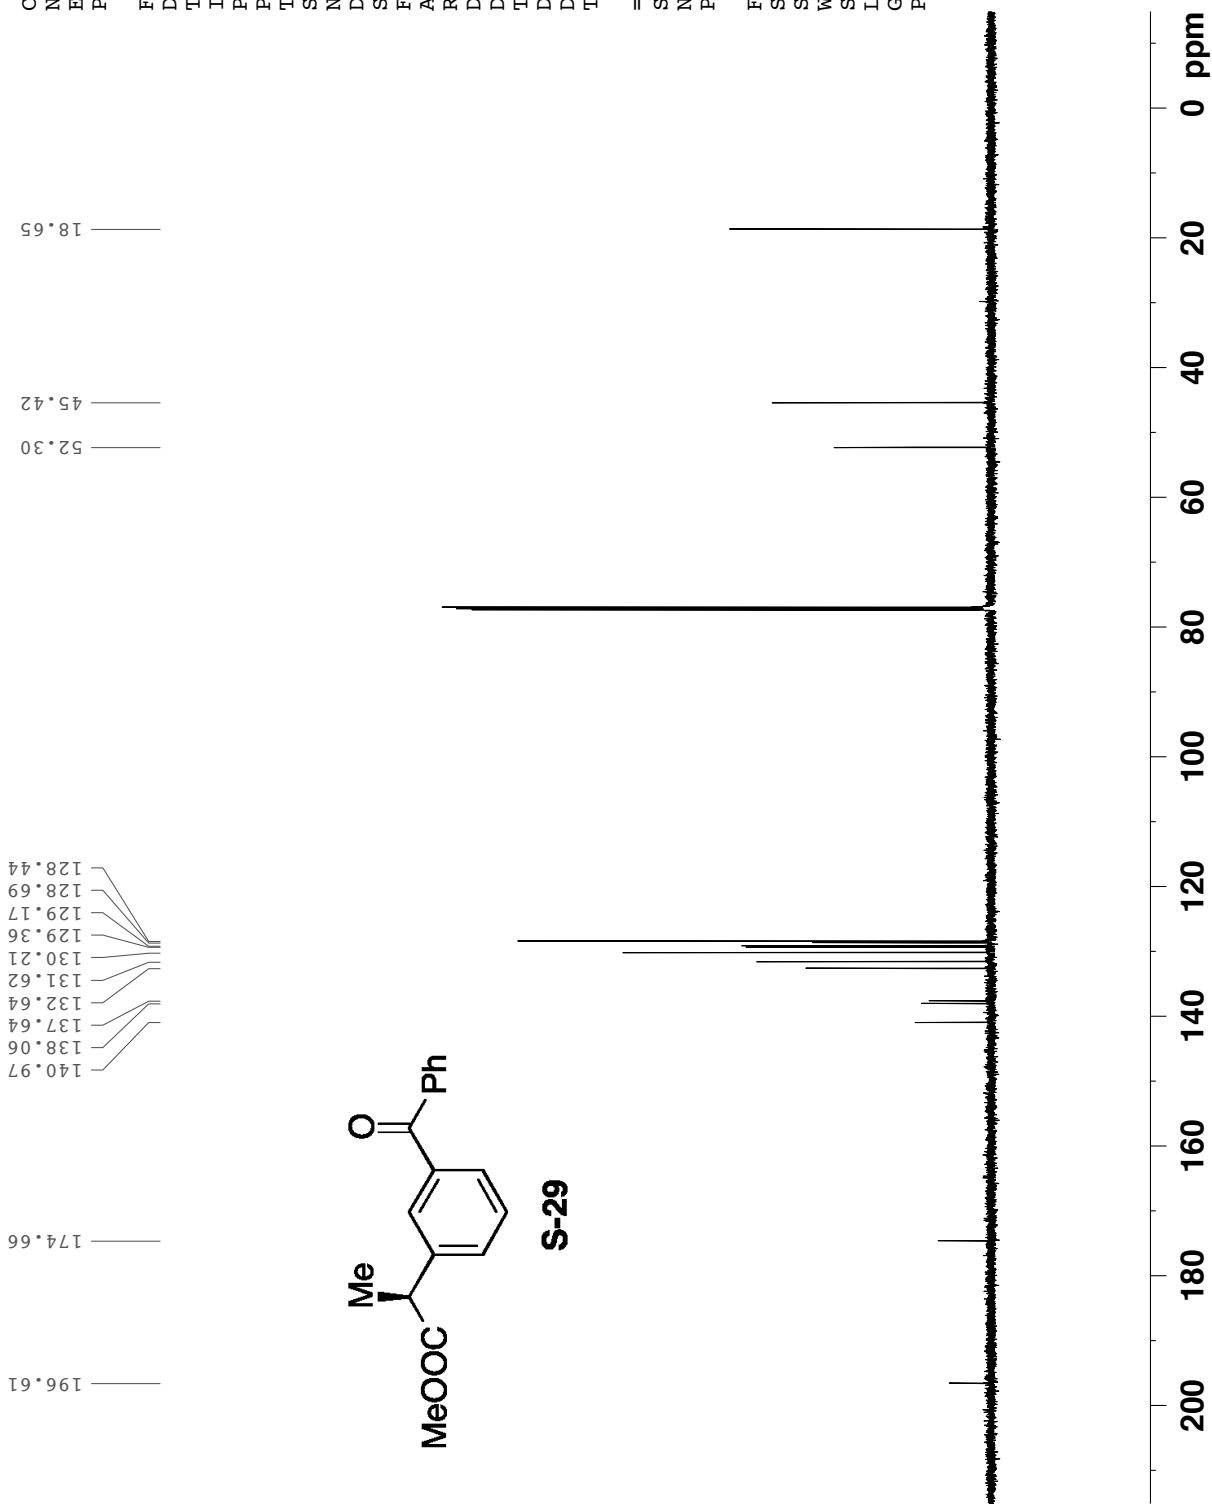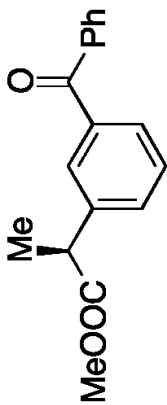

S-29



compound 27 1HNMR

7.355  
7.342  
7.330  
7.317  
7.286  
7.275  
7.259  
6.184  
6.172  
5.766  
5.756  
5.744  
5.730  
5.719  
5.708  
5.652  
5.649  
5.640  
5.638  
5.626  
5.624  
5.615  
5.613

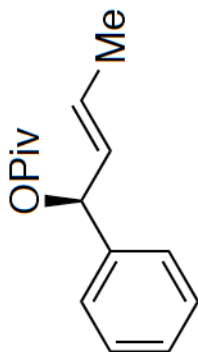

27

1.716  
1.706  
1.222

Current Data Parameters  
NAME QZ-3-239-1-NEW  
EXPNO 1  
PROCNO 1

F2 - Acquisition Parameters  
Date\_ 20140108  
Time\_ 12.21  
INSTRUM spect  
PROBHD 5 mm PABBO BB/  
PULPROG zg30  
TD 65536  
SOLVENT CDCl3  
NS 8  
DS 2  
SWH 8403.361 Hz  
FIDRES 0.128225 Hz  
AQ 3.8994420 sec  
RG 128  
DW 59.500 usec  
DE 17.39 usec  
TE 298.0 K  
D1 1.00000000 sec  
TD0 1

==== CHANNEL f1 =====  
SFO1 600.3233018 MHz  
NUC1 1H  
P1 10.77 usec

F2 - Processing parameters  
SI 65536  
SF 600.3200150 MHz  
WDW EM  
SSB 0  
LB 0.30 Hz  
GB 0  
PC 1.00

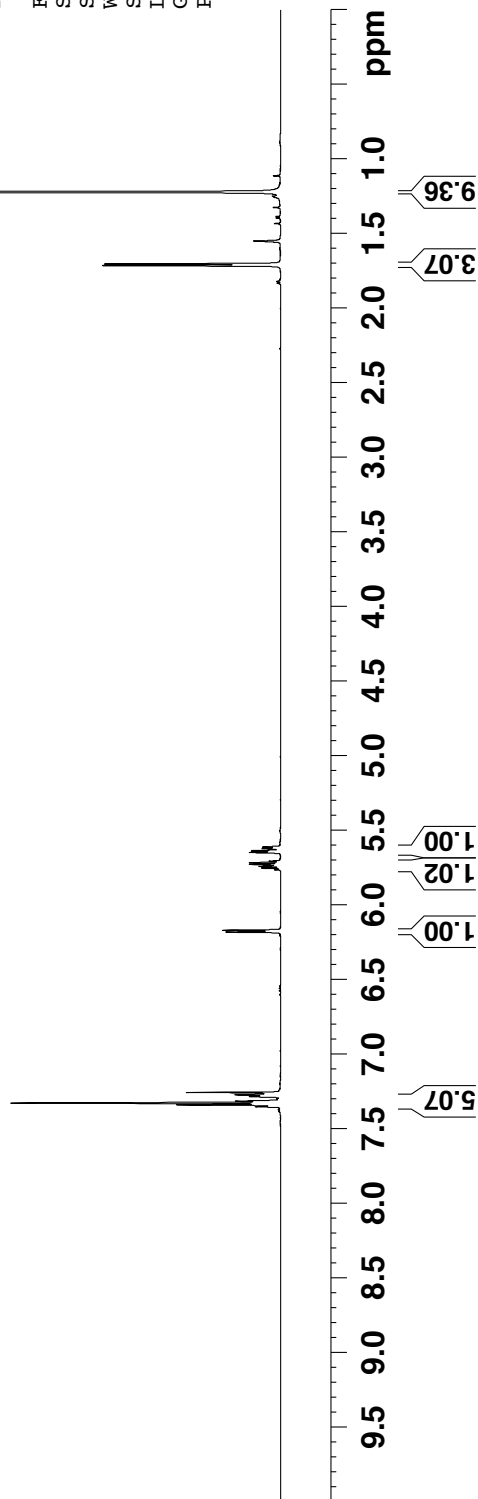



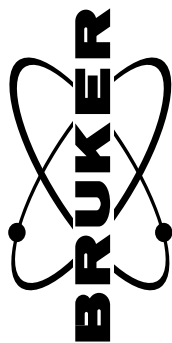

compound 28 1HNMR

Current Data Parameters  
NAME QZ-5-009fr1  
EXPNO 1  
PROCNO 1

F2 - Acquisition Parameters  
Date\_ 20131121  
Time\_ 18.18  
INSTRUM spect  
PROBHD 5 mm CPQNP 1H/  
PULPROG zg30  
TD 65536  
SOLVENT CDCl3  
NS 16  
DS 2  
SWH 8278.146 Hz  
FIDRES 0.126314 Hz  
AQ 3.9584243 sec  
RG 8  
DW 60.400 usec  
DE 6.00 usec  
TE 298.1 K  
D1 1.00000000 sec  
TD0 1

==== CHANNEL f1 =====  
NUC1 1H  
P1 15.00 usec  
PL1 4.90 dB  
PL1W 3.30822015 W  
SFO1 400.1324710 MHz

F2 - Processing parameters  
SI 32768  
SF 400.1300105 MHz  
WDW EM  
SSB 0  
LB 0.30 Hz  
GB 0  
PC 1.00

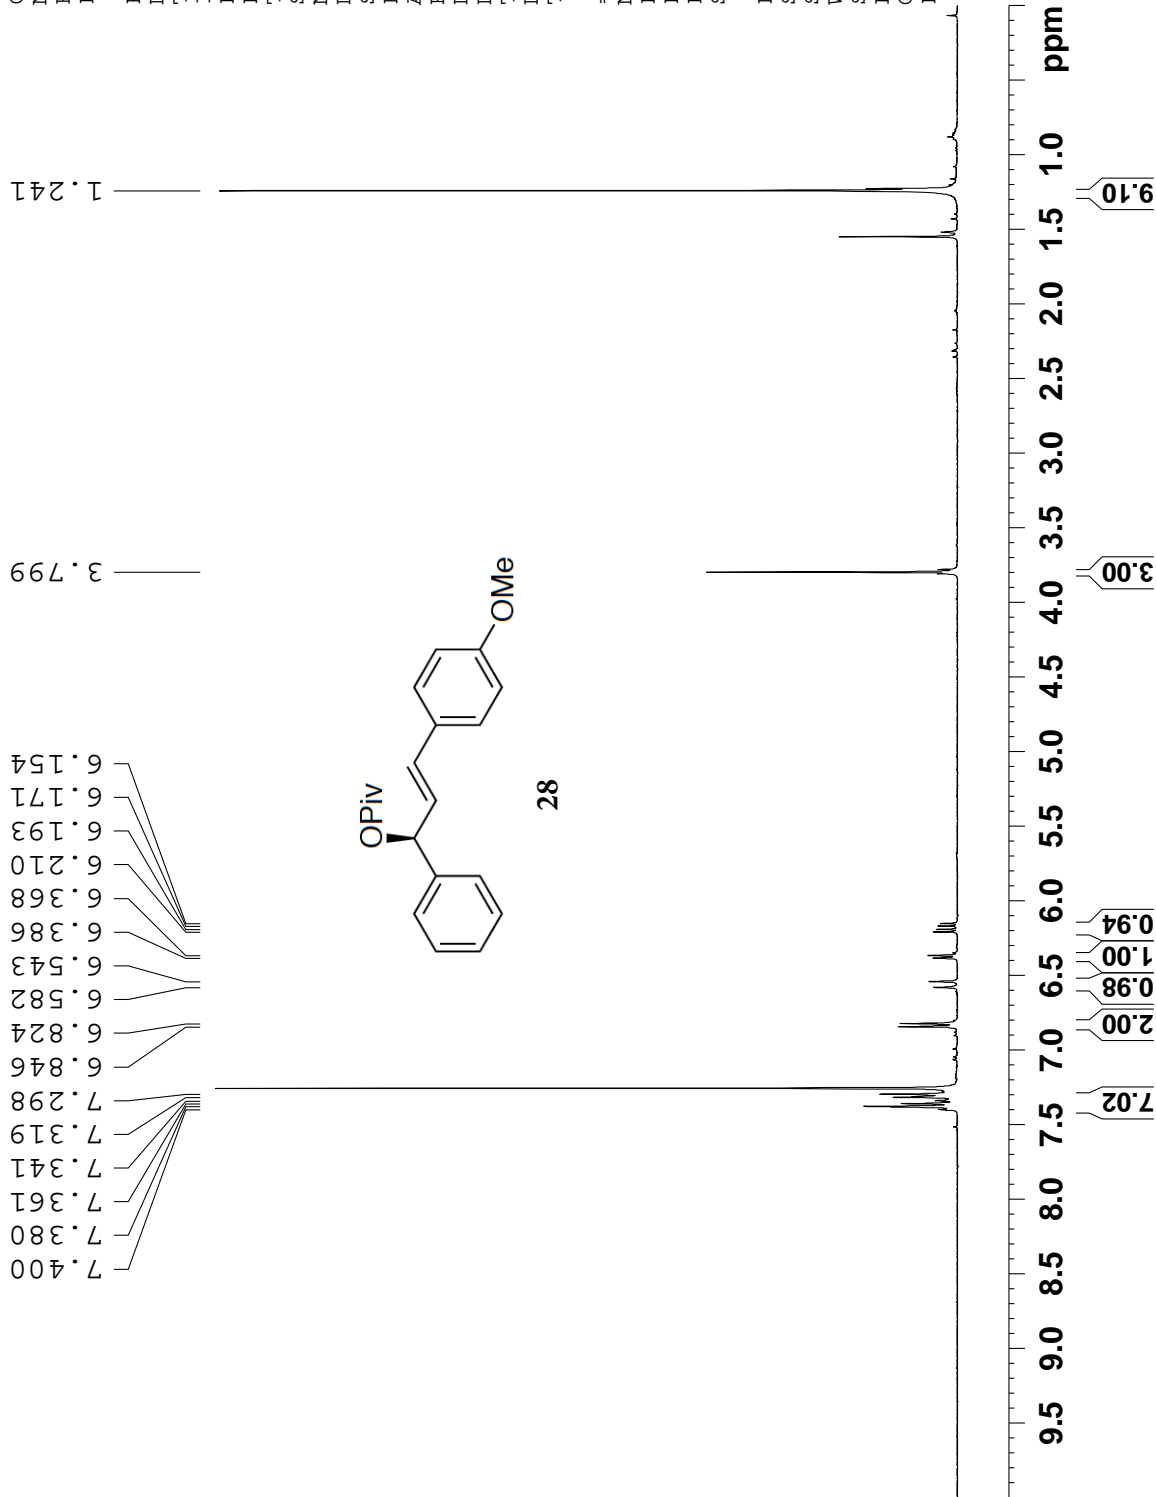



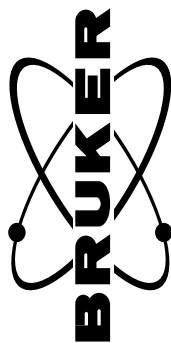

compound 28 13CNMR

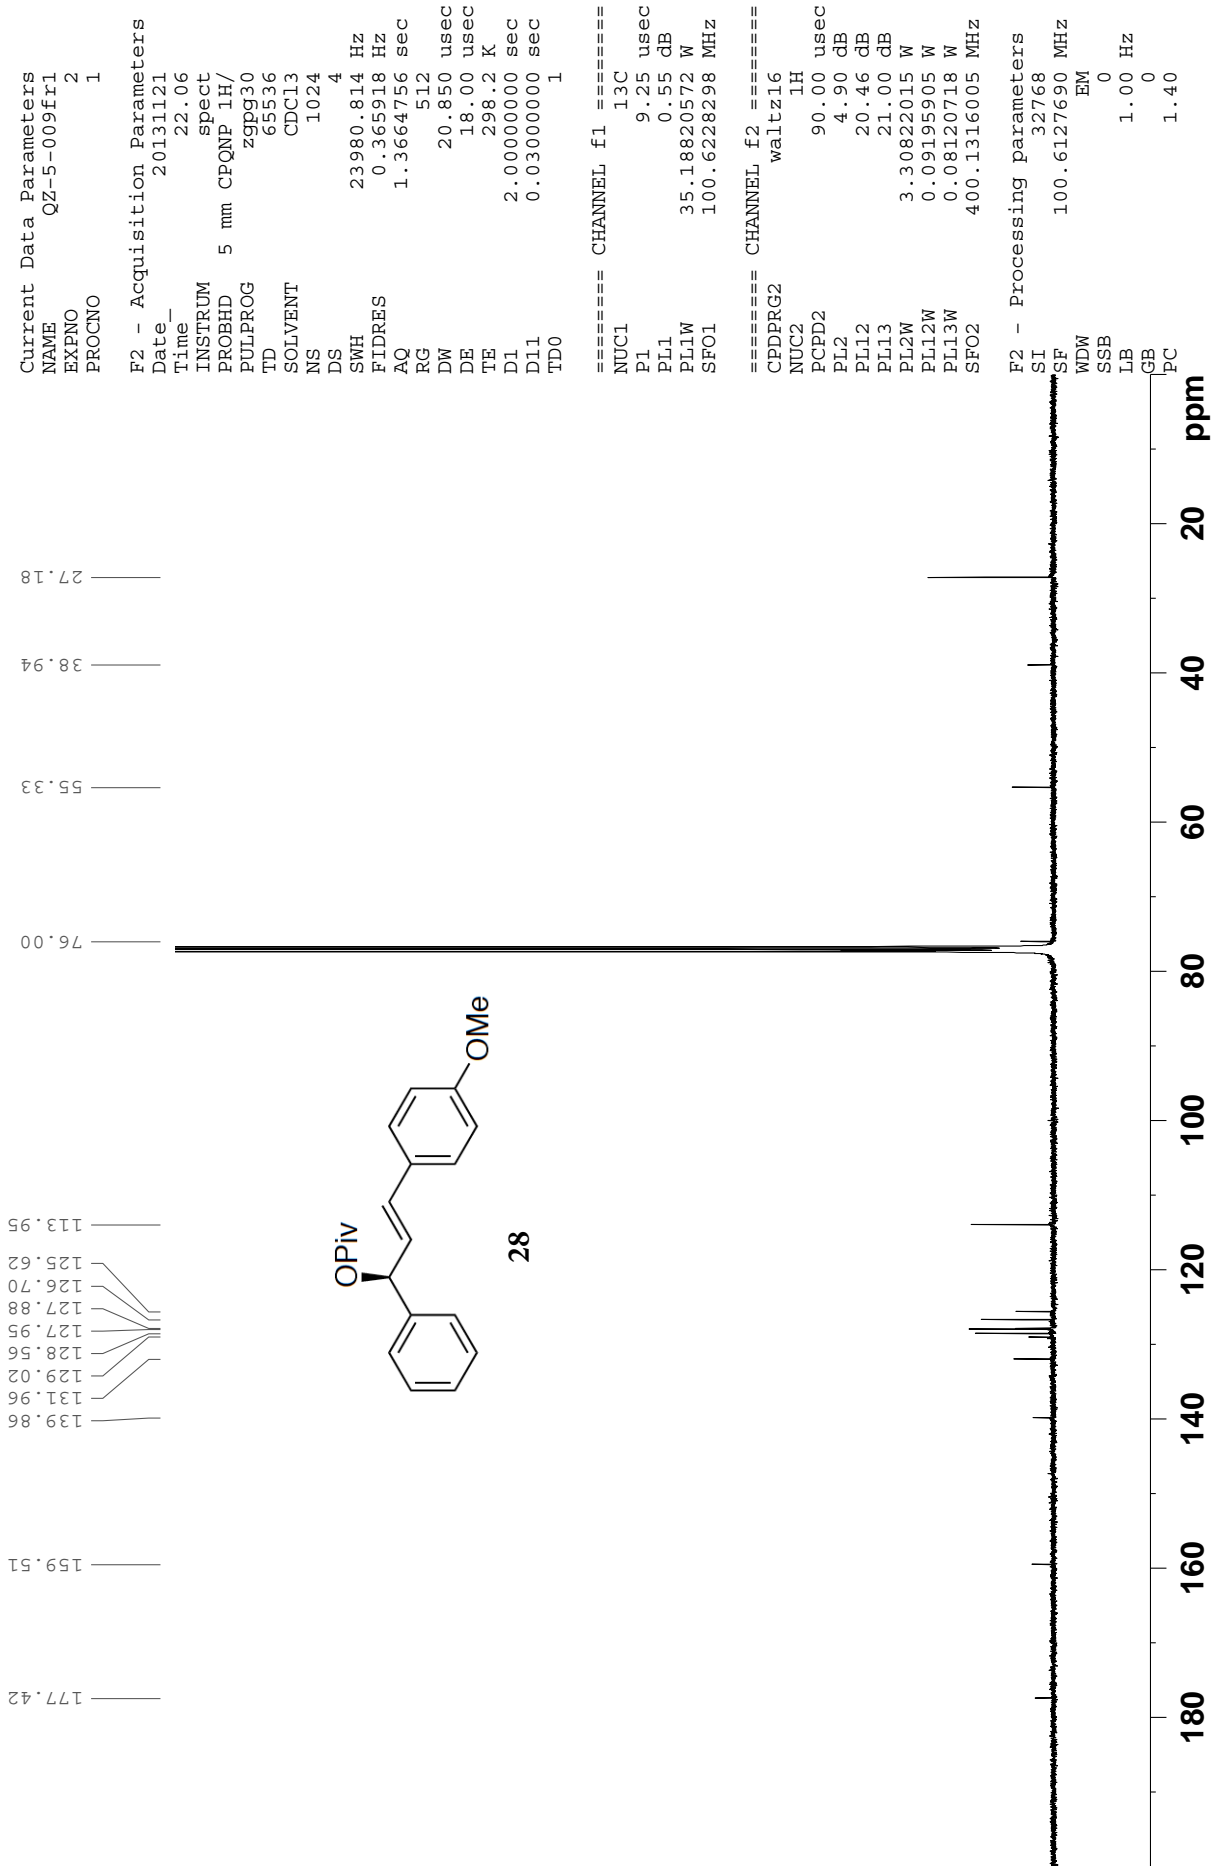



29 and enantioenriched 30

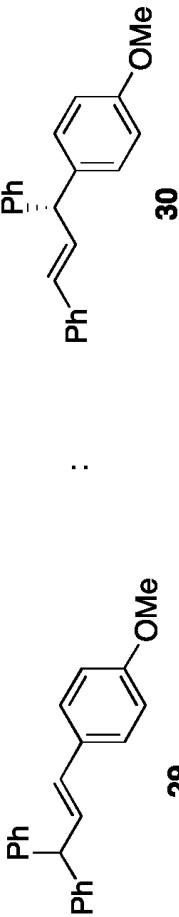

7.304  
 7.297  
 7.284  
 7.260  
 7.253  
 7.239  
 7.226  
 7.213  
 7.200  
 7.165  
 7.151  
 6.870  
 6.855  
 6.847  
 6.833  
 6.678  
 6.666  
 6.652  
 6.639  
 6.555  
 6.555  
 6.542  
 6.528  
 6.516  
 6.349  
 6.323  
 6.313  
 6.287  
 4.885  
 4.872  
 4.863  
 4.851  
 3.801  
 3.799

1.5

1

Current Data Parameters  
 NAME QZ-5-123-2  
 EXPNO 1  
 PROCNO 1  
 F2 - Acquisition Parameters  
 Date\_ 20140214  
 Time\_ 13.20  
 INSTRUM spect  
 PROBHD 5 mm PABBO BB/  
 PULPROG zg30  
 TD 65536  
 SOLVENT CDCl3  
 NS 8  
 DS 2  
 SWH 8403.361 Hz  
 FIDRES 0.128225 Hz  
 AQ 3.8994420 sec  
 RG 144  
 DW 59.500 usec  
 DE 17.39 usec  
 TE 298.0 K  
 D1 1.00000000 sec  
 TD0 1  
 ===== CHANNEL f1 =====  
 SFO1 600.3233018 MHz  
 NUC1 1H  
 P1 10.77 usec  
 F2 - Processing parameters  
 SI 65536  
 SF 600.3200141 MHz  
 WDW EM  
 SSB 0  
 LB 0.30 Hz  
 GB 0  
 PC 1.00

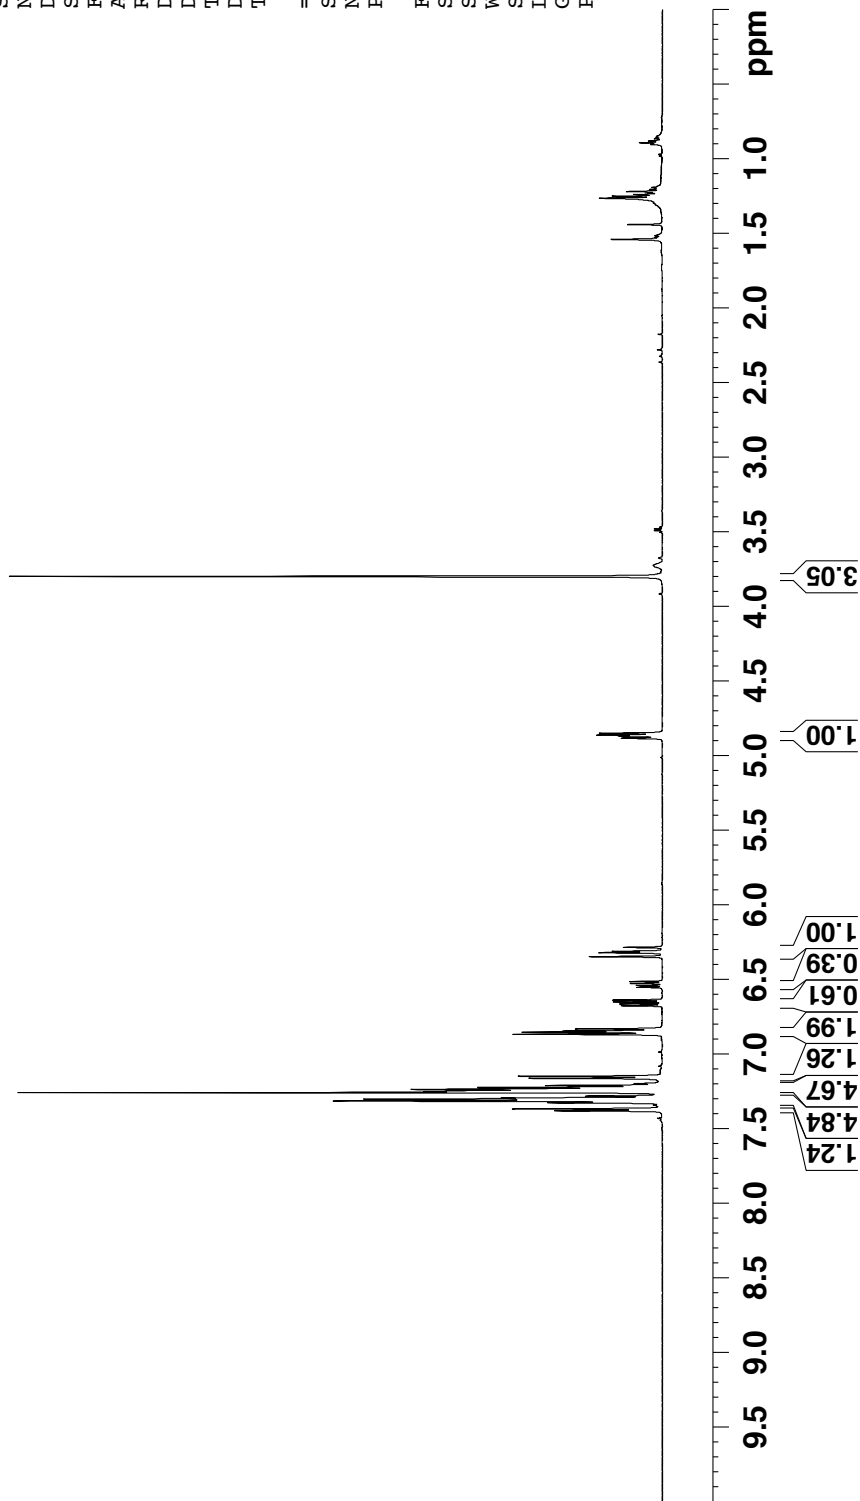

## Racemic **2**

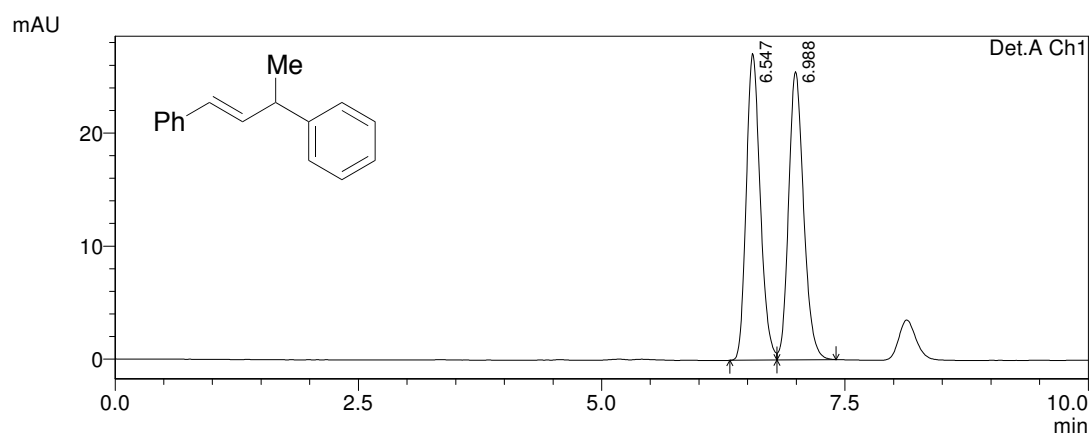

Detector A Ch1 254nm

| Peak# | Ret. Time | Area   | Height | Area %  | Height % |
|-------|-----------|--------|--------|---------|----------|
| 1     | 6.547     | 270789 | 27126  | 49.766  | 51.556   |
| 2     | 6.988     | 273337 | 25488  | 50.234  | 48.444   |
| Total |           | 544126 | 52614  | 100.000 | 100.000  |

## Enantioenriched **2**, ee = 95%

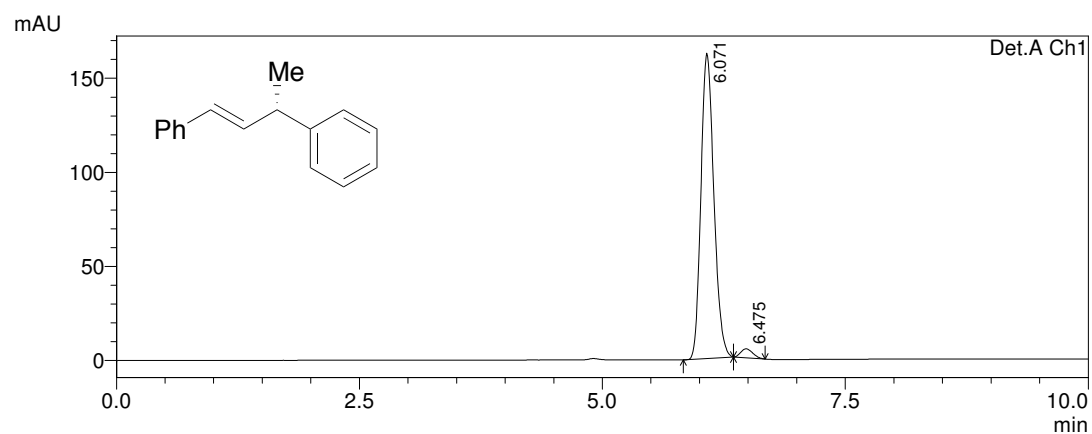

Detector A Ch1 254nm

| Peak# | Ret. Time | Area    | Height | Area %  | Height % |
|-------|-----------|---------|--------|---------|----------|
| 1     | 6.071     | 1497700 | 162221 | 97.383  | 97.181   |
| 2     | 6.475     | 40241   | 4706   | 2.617   | 2.819    |
| Total |           | 1537941 | 166928 | 100.000 | 100.000  |

Enantioenriched (*R*)-**2**, prepared from **27**, as shown in Scheme 5, ee = 83%

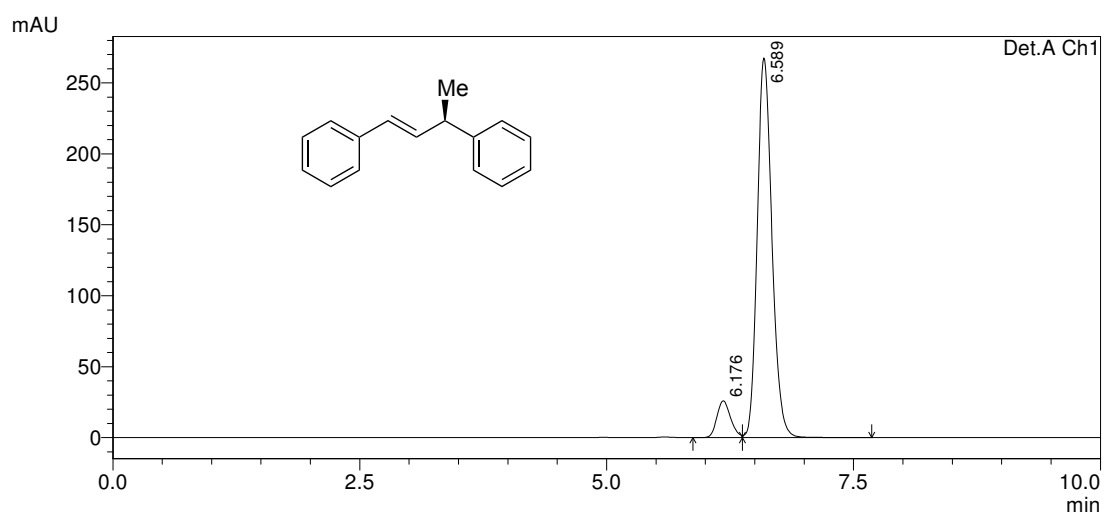

Detector A Ch1 254nm

| Peak# | Ret. Time | Area    | Height | Area %  | Height % |
|-------|-----------|---------|--------|---------|----------|
| 1     | 6.176     | 249802  | 25887  | 8.275   | 8.818    |
| 2     | 6.589     | 2768940 | 267665 | 91.725  | 91.182   |
| Total |           | 3018741 | 293552 | 100.000 | 100.000  |

### Racemic 3

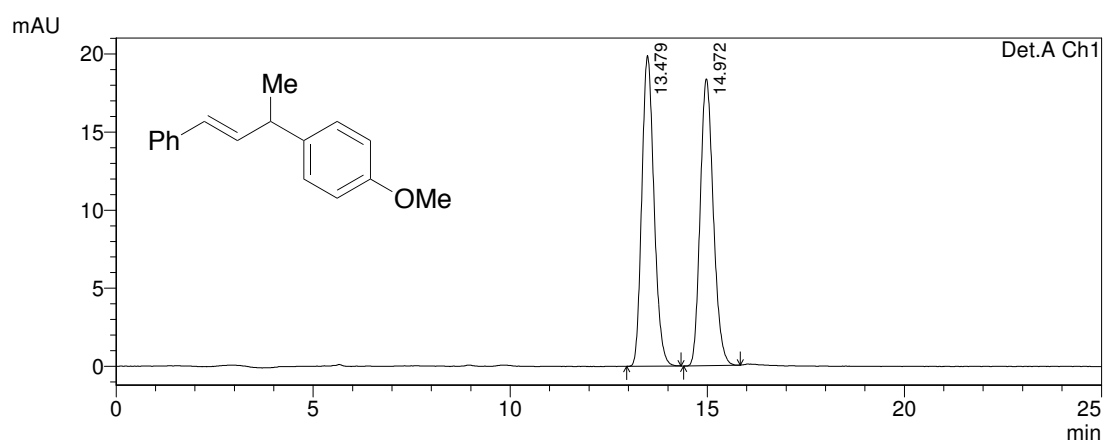

Detector A Ch1 254nm

| Peak# | Ret. Time | Area   | Height | Area %  | Height % |
|-------|-----------|--------|--------|---------|----------|
| 1     | 13.479    | 427846 | 19884  | 50.127  | 51.998   |
| 2     | 14.972    | 425680 | 18356  | 49.873  | 48.002   |
| Total |           | 853526 | 38240  | 100.000 | 100.000  |

### Enantioenriched 3, ee = 89%

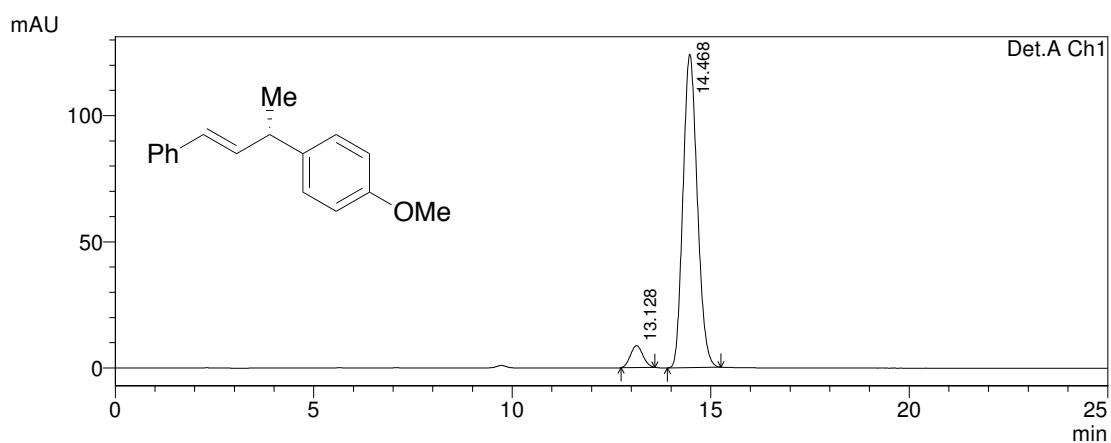

Detector A Ch1 254nm

| Peak# | Ret. Time | Area    | Height | Area %  | Height % |
|-------|-----------|---------|--------|---------|----------|
| 1     | 13.128    | 189418  | 8679   | 5.739   | 6.535    |
| 2     | 14.468    | 3111331 | 124131 | 94.261  | 93.465   |
| Total |           | 3300749 | 132811 | 100.000 | 100.000  |

### Racemic 4

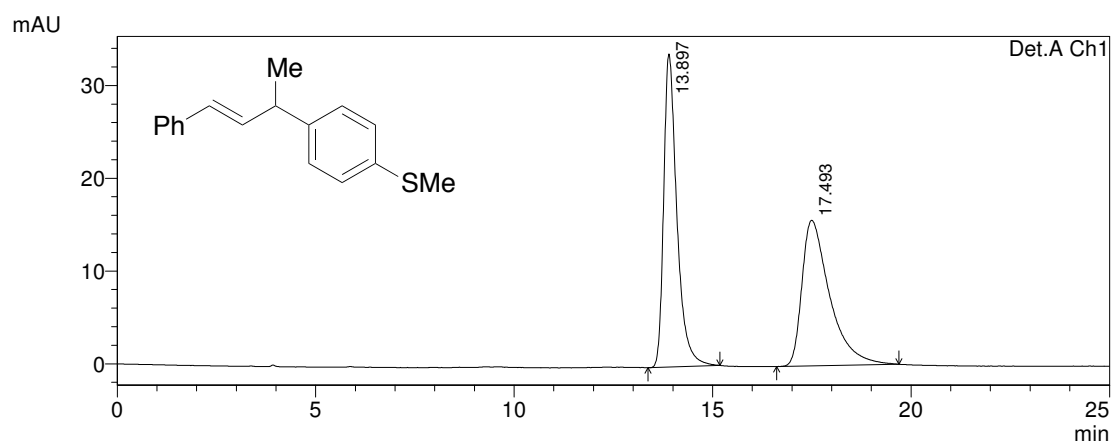

Detector A Ch1 254nm

| Peak# | Ret. Time | Area    | Height | Area %  | Height % |
|-------|-----------|---------|--------|---------|----------|
| 1     | 13.897    | 780775  | 33745  | 50.587  | 68.263   |
| 2     | 17.493    | 762670  | 15688  | 49.413  | 31.737   |
| Total |           | 1543445 | 49433  | 100.000 | 100.000  |

### Enantioenriched 4, ee = 93%

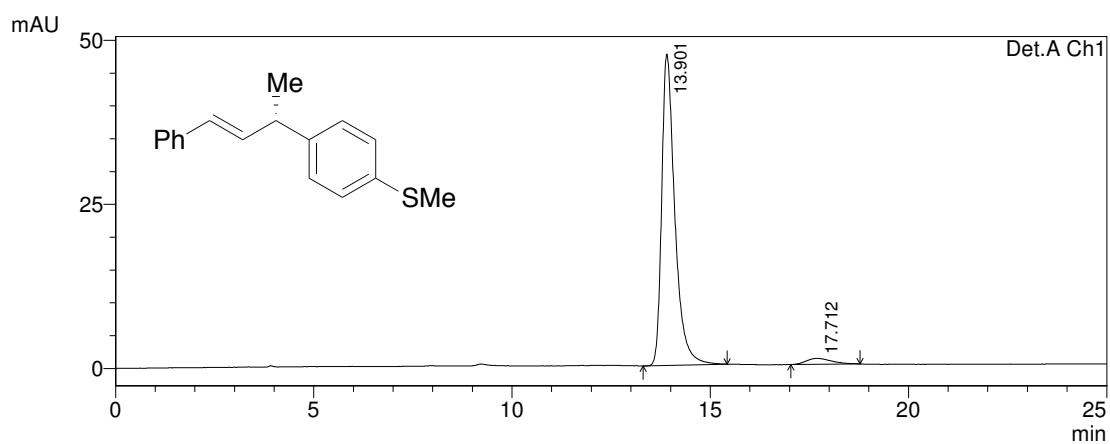

Detector A Ch1 254nm

| Peak# | Ret. Time | Area    | Height | Area %  | Height % |
|-------|-----------|---------|--------|---------|----------|
| 1     | 13.901    | 1093788 | 47430  | 96.408  | 98.119   |
| 2     | 17.712    | 40748   | 909    | 3.592   | 1.881    |
| Total |           | 1134537 | 48339  | 100.000 | 100.000  |

## Racemic 5

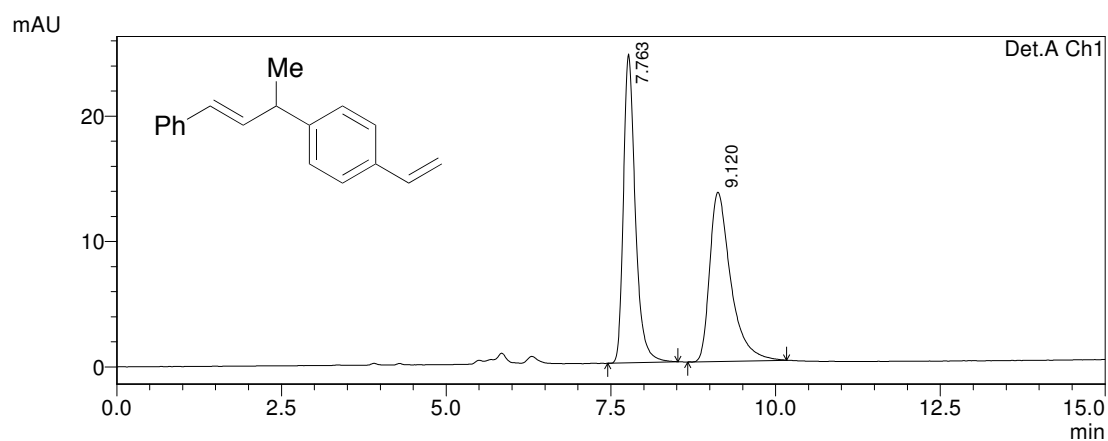

Detector A Ch1 254nm

| Peak# | Ret. Time | Area   | Height | Area %  | Height % |
|-------|-----------|--------|--------|---------|----------|
| 1     | 7.763     | 309122 | 24632  | 50.797  | 64.592   |
| 2     | 9.120     | 299424 | 13503  | 49.203  | 35.408   |
| Total |           | 608545 | 38135  | 100.000 | 100.000  |

## Enantioenriched 5, ee = 91%

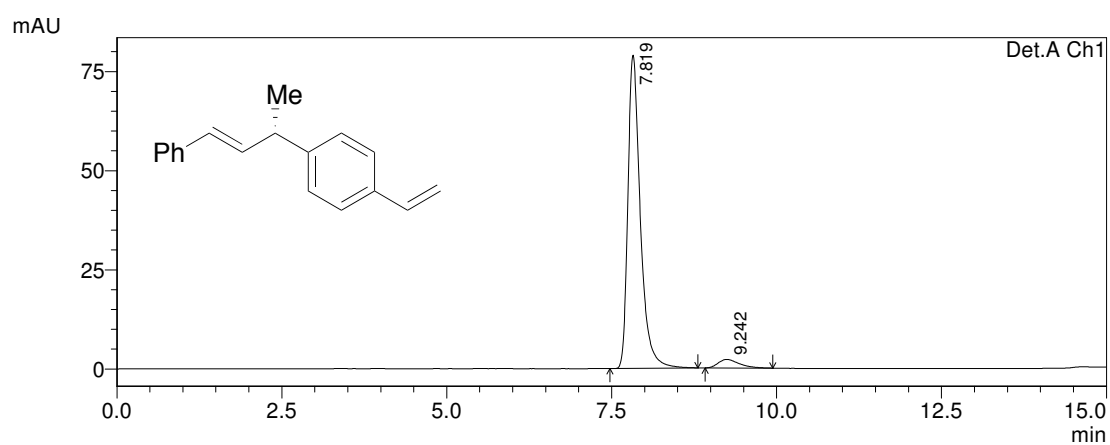

Detector A Ch1 254nm

| Peak# | Ret. Time | Area    | Height | Area %  | Height % |
|-------|-----------|---------|--------|---------|----------|
| 1     | 7.819     | 1036677 | 78979  | 95.516  | 97.324   |
| 2     | 9.242     | 48666   | 2171   | 4.484   | 2.676    |
| Total |           | 1085343 | 81150  | 100.000 | 100.000  |

## Racemic 6

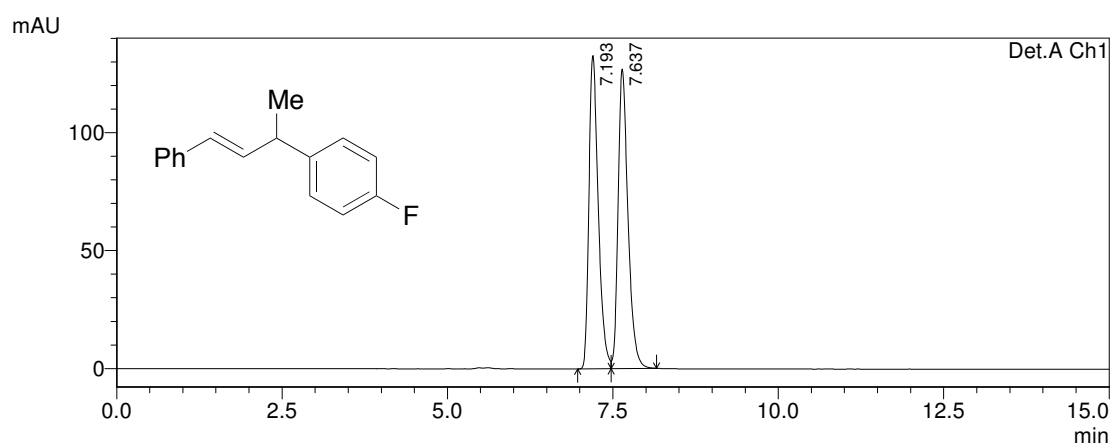

Detector A Ch1 254nm

| Peak# | Ret. Time | Area    | Height | Area %  | Height % |
|-------|-----------|---------|--------|---------|----------|
| 1     | 7.193     | 1303841 | 132756 | 49.668  | 51.098   |
| 2     | 7.637     | 1321281 | 127053 | 50.332  | 48.902   |
| Total |           | 2625122 | 259810 | 100.000 | 100.000  |

## Enantioenriched 6, ee = 93%

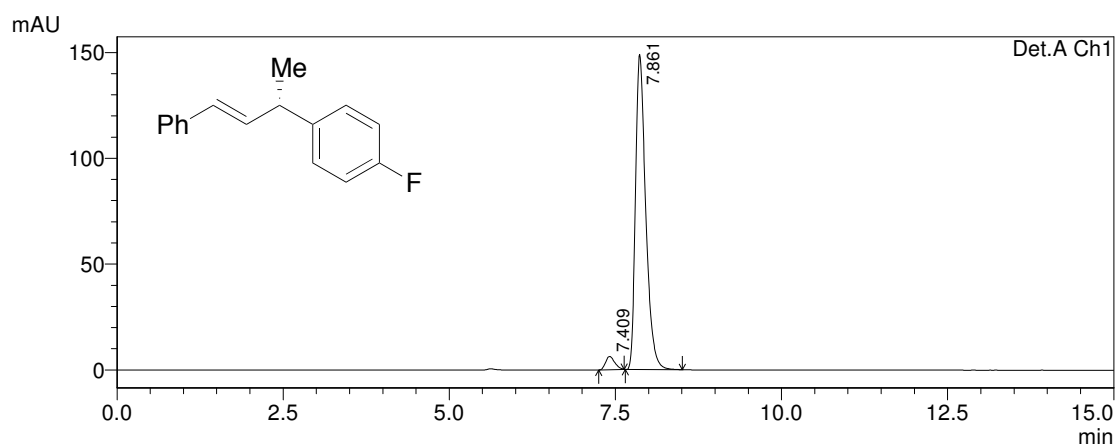

Detector A Ch1 254nm

| Peak# | Ret. Time | Area    | Height | Area %  | Height % |
|-------|-----------|---------|--------|---------|----------|
| 1     | 7.409     | 59690   | 6261   | 3.607   | 4.036    |
| 2     | 7.861     | 1595262 | 148864 | 96.393  | 95.964   |
| Total |           | 1654951 | 155125 | 100.000 | 100.000  |



## Racemic 7

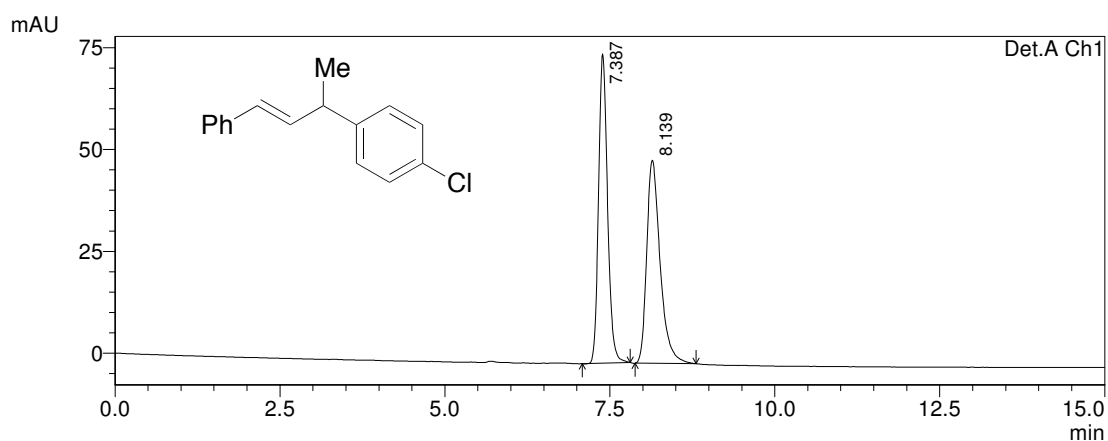

Detector A Ch1 254nm

| Peak# | Ret. Time | Area    | Height | Area %  | Height % |
|-------|-----------|---------|--------|---------|----------|
| 1     | 7.387     | 719087  | 75904  | 50.501  | 60.370   |
| 2     | 8.139     | 704825  | 49826  | 49.499  | 39.630   |
| Total |           | 1423912 | 125730 | 100.000 | 100.000  |

## Enantioenriched 7, ee = 94%

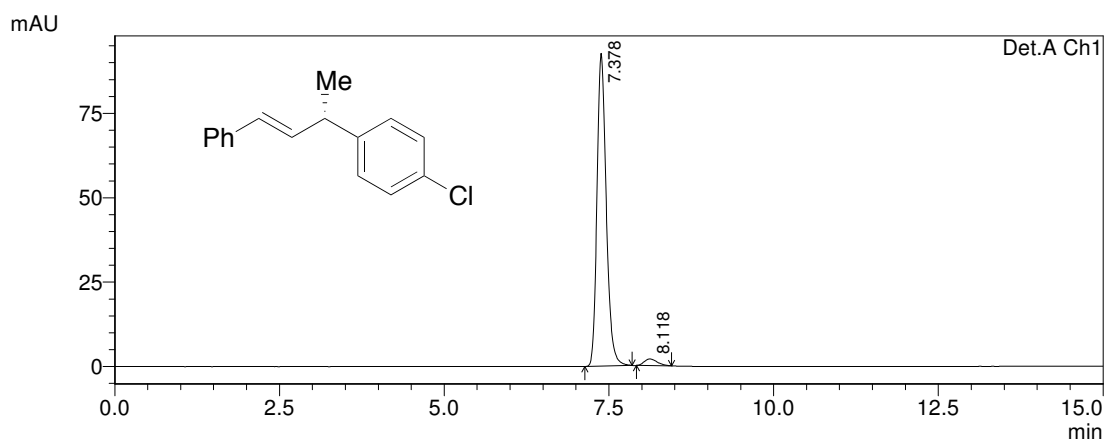

Detector A Ch1 254nm

| Peak# | Ret. Time | Area   | Height | Area %  | Height % |
|-------|-----------|--------|--------|---------|----------|
| 1     | 7.378     | 904758 | 92637  | 97.094  | 97.924   |
| 2     | 8.118     | 27077  | 1964   | 2.906   | 2.076    |
| Total |           | 931836 | 94601  | 100.000 | 100.000  |

## Racemic **8**

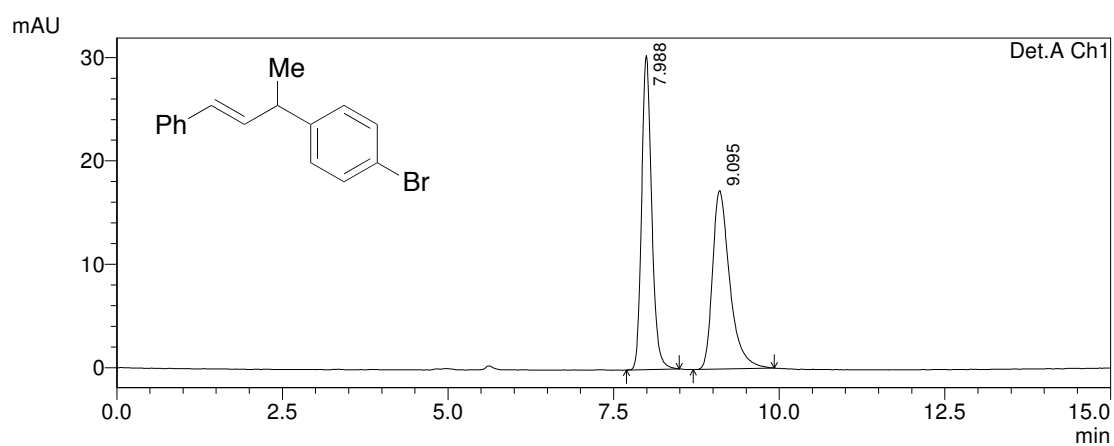

Detector A Ch1 254nm

| Peak# | Ret. Time | Area   | Height | Area %  | Height % |
|-------|-----------|--------|--------|---------|----------|
| 1     | 7.988     | 320442 | 30359  | 50.720  | 63.778   |
| 2     | 9.095     | 311345 | 17242  | 49.280  | 36.222   |
| Total |           | 631787 | 47601  | 100.000 | 100.000  |

## Enantioenriched **8**, ee = 96%

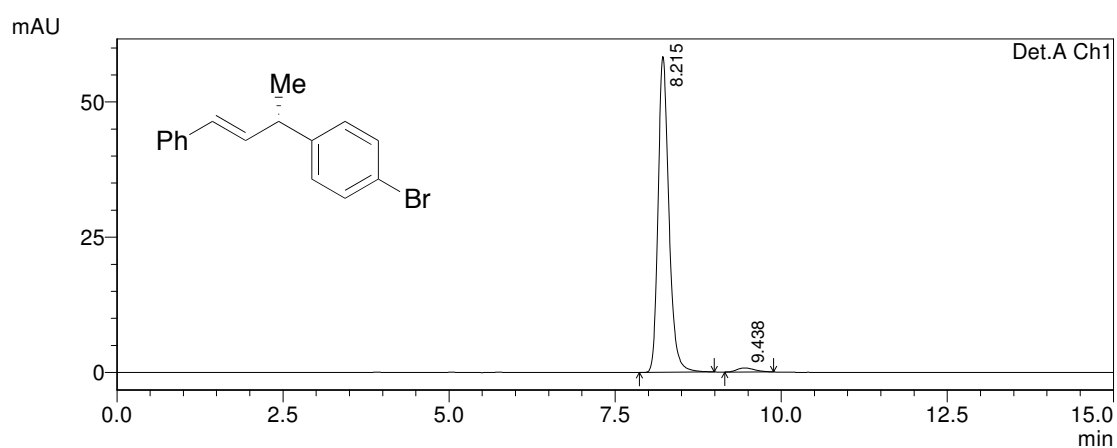

Detector A Ch1 254nm

| Peak# | Ret. Time | Area   | Height | Area %  | Height % |
|-------|-----------|--------|--------|---------|----------|
| 1     | 8.215     | 661539 | 58358  | 97.938  | 98.732   |
| 2     | 9.438     | 13930  | 749    | 2.062   | 1.268    |
| Total |           | 675469 | 59108  | 100.000 | 100.000  |

## Racemic **9**

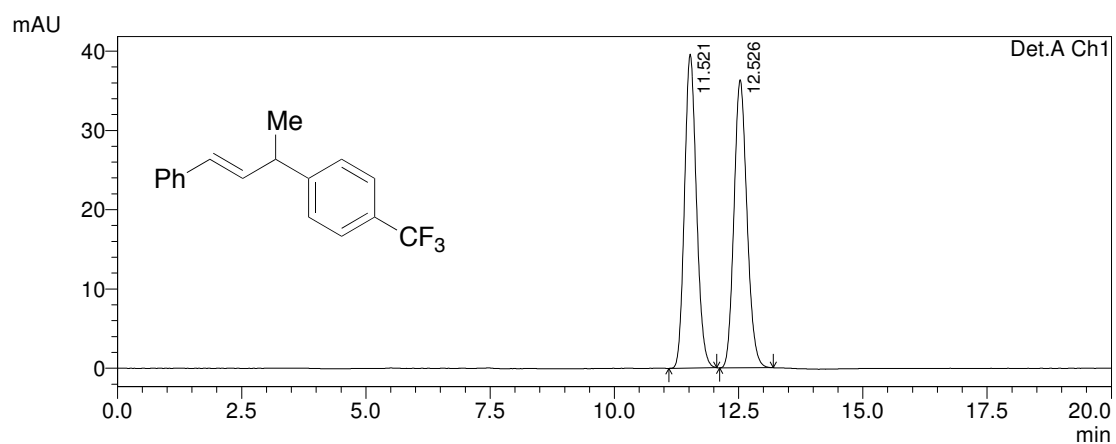

Detector A Ch1 254nm

| Peak# | Ret. Time | Area    | Height | Area %  | Height % |
|-------|-----------|---------|--------|---------|----------|
| 1     | 11.521    | 660610  | 39588  | 50.006  | 52.136   |
| 2     | 12.526    | 660455  | 36345  | 49.994  | 47.864   |
| Total |           | 1321065 | 75933  | 100.000 | 100.000  |

## Enantioenriched **9**, ee = 91%

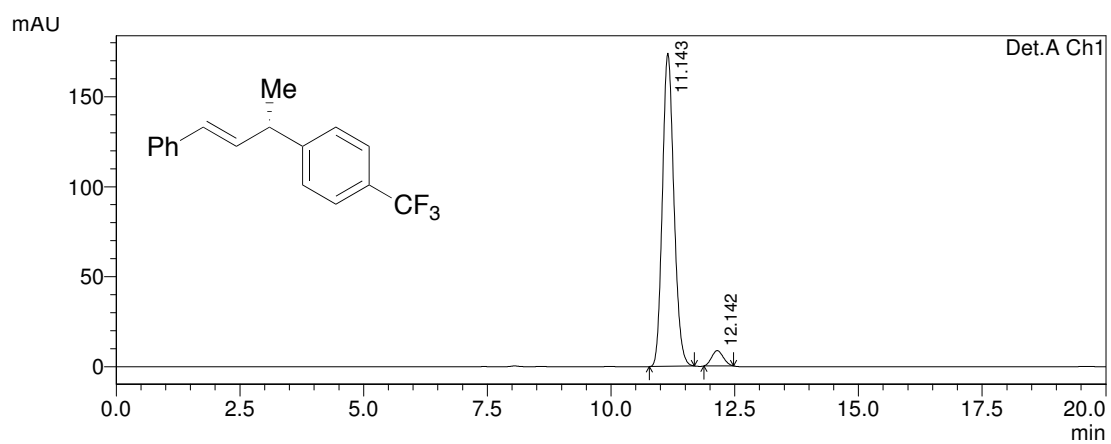

Detector A Ch1 254nm

| Peak# | Ret. Time | Area    | Height | Area %  | Height % |
|-------|-----------|---------|--------|---------|----------|
| 1     | 11.143    | 2817309 | 173908 | 95.290  | 95.325   |
| 2     | 12.142    | 139267  | 8530   | 4.710   | 4.675    |
| Total |           | 2956576 | 182438 | 100.000 | 100.000  |

## Racemic **10**

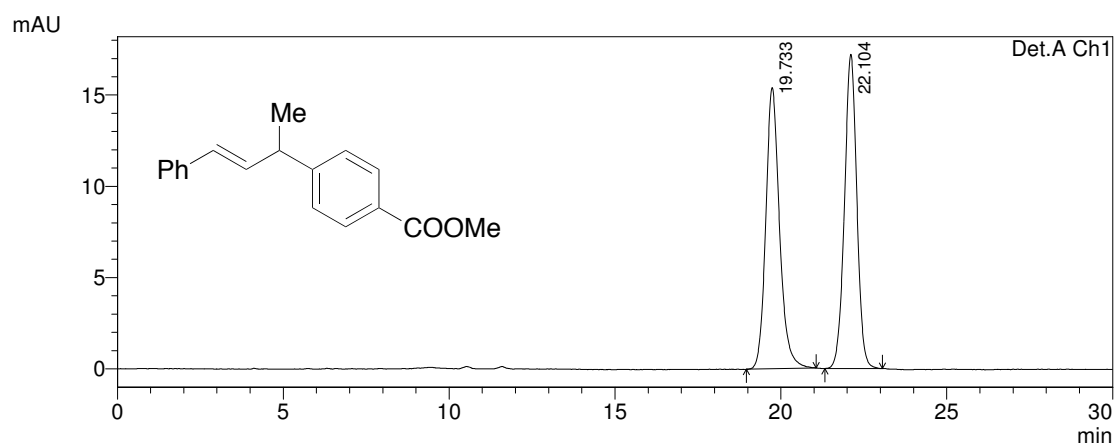

Detector A Ch1 254nm

| Peak# | Ret. Time | Area   | Height | Area %  | Height % |
|-------|-----------|--------|--------|---------|----------|
| 1     | 19.733    | 444003 | 15399  | 49.901  | 47.223   |
| 2     | 22.104    | 445768 | 17211  | 50.099  | 52.777   |
| Total |           | 889771 | 32610  | 100.000 | 100.000  |

## Enantioenriched **10**, ee = 89%

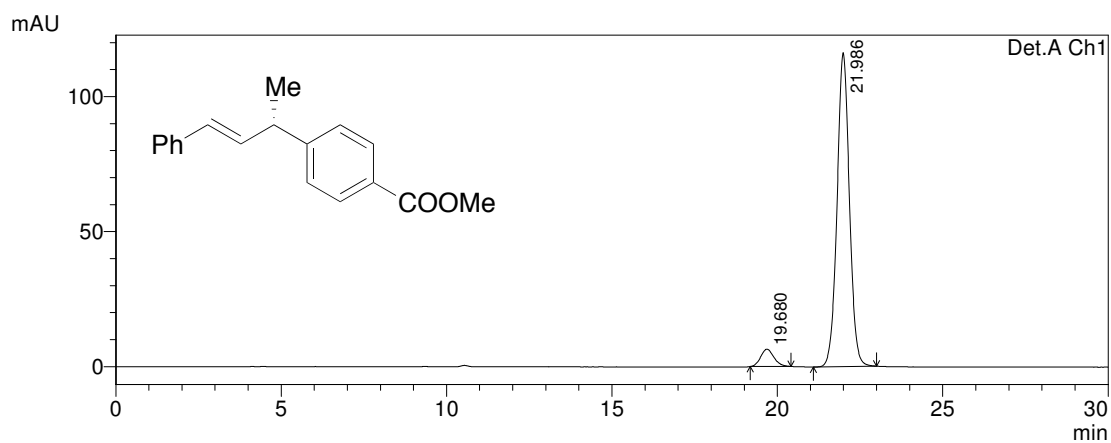

Detector A Ch1 254nm

| Peak# | Ret. Time | Area    | Height | Area %  | Height % |
|-------|-----------|---------|--------|---------|----------|
| 1     | 19.680    | 178540  | 6440   | 5.592   | 5.249    |
| 2     | 21.986    | 3014453 | 116234 | 94.408  | 94.751   |
| Total |           | 3192993 | 122673 | 100.000 | 100.000  |

## Racemic **11**

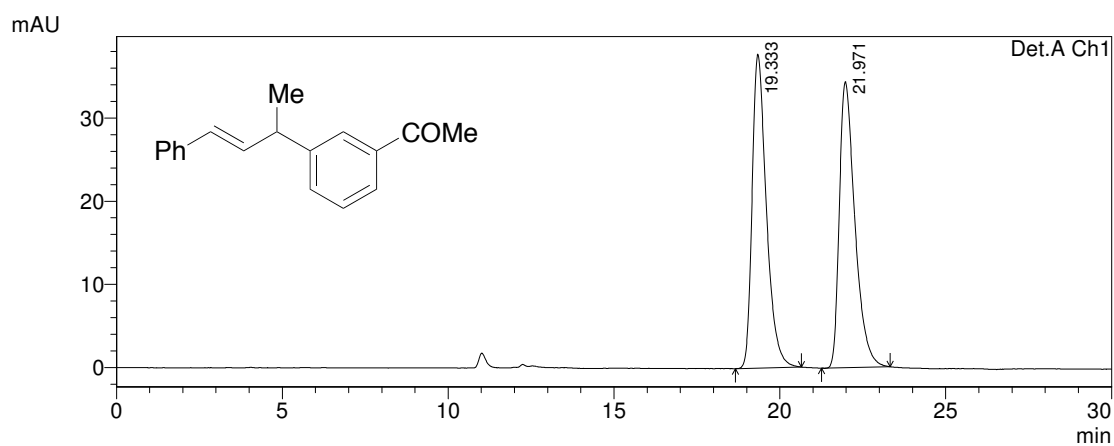

Detector A Ch1 254nm

| Peak# | Ret. Time | Area    | Height | Area %  | Height % |
|-------|-----------|---------|--------|---------|----------|
| 1     | 19.333    | 1126904 | 37748  | 50.126  | 52.323   |
| 2     | 21.971    | 1121253 | 34396  | 49.874  | 47.677   |
| Total |           | 2248157 | 72144  | 100.000 | 100.000  |

## Enantioenriched **11**, ee = 91%

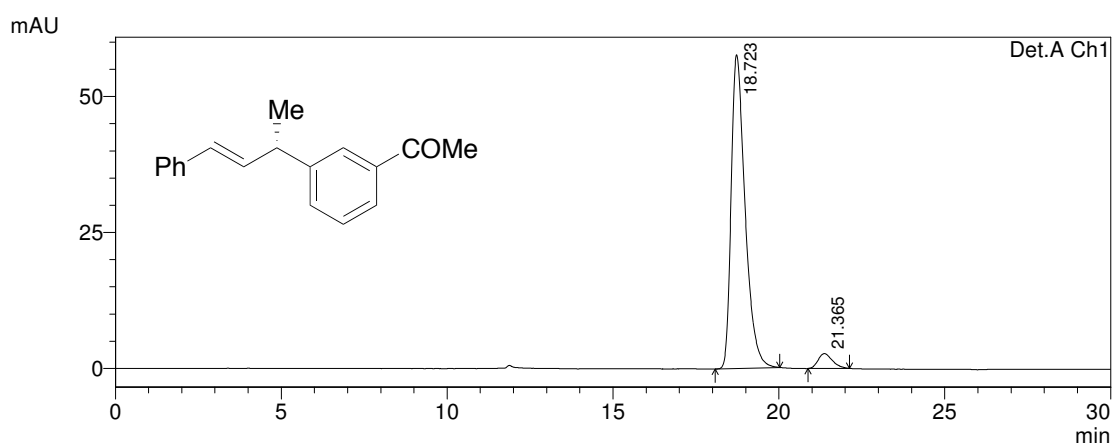

Detector A Ch1 254nm

| Peak# | Ret. Time | Area    | Height | Area %  | Height % |
|-------|-----------|---------|--------|---------|----------|
| 1     | 18.723    | 1683869 | 57676  | 95.364  | 95.458   |
| 2     | 21.365    | 81861   | 2744   | 4.636   | 4.542    |
| Total |           | 1765730 | 60420  | 100.000 | 100.000  |

## Racemic **12**

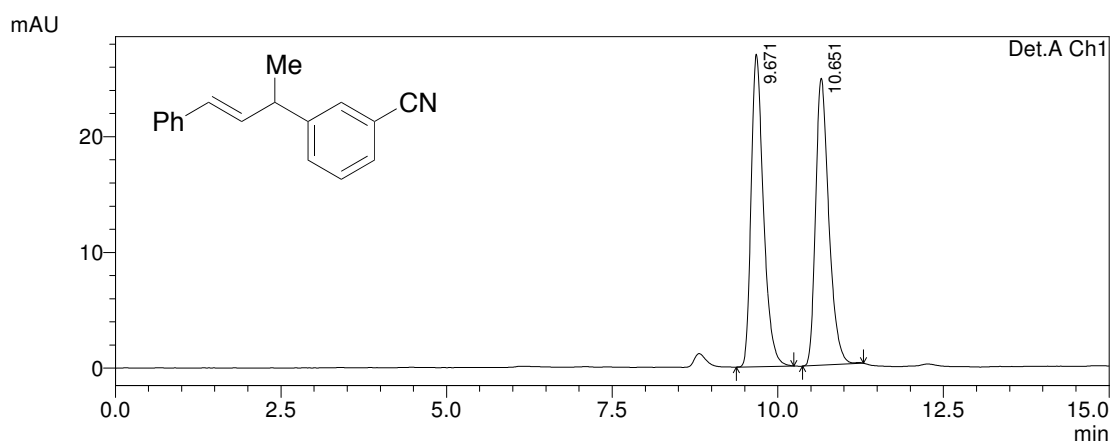

Detector A Ch1 254nm

| Peak# | Ret. Time | Area   | Height | Area %  | Height % |
|-------|-----------|--------|--------|---------|----------|
| 1     | 9.671     | 349082 | 27005  | 50.386  | 52.117   |
| 2     | 10.651    | 343730 | 24810  | 49.614  | 47.883   |
| Total |           | 692812 | 51815  | 100.000 | 100.000  |

## Enantioenriched **12**, ee = 93%

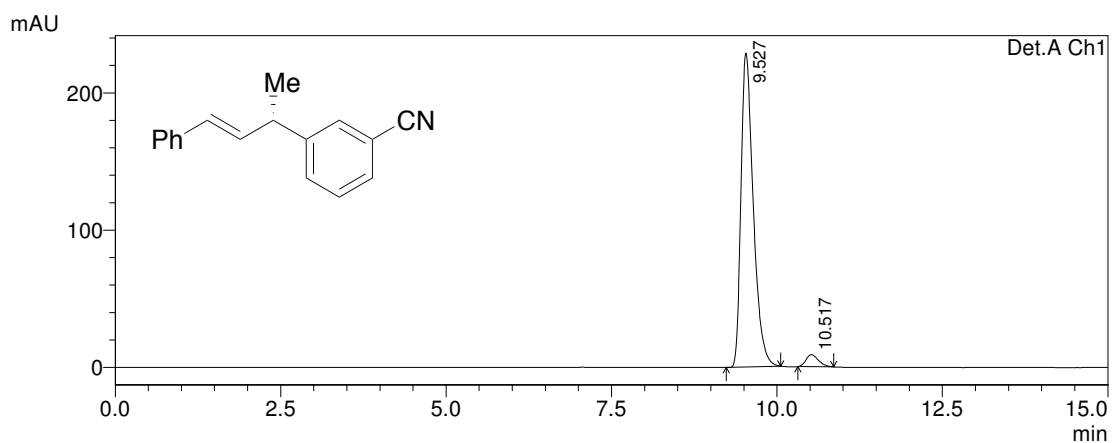

Detector A Ch1 254nm

| Peak# | Ret. Time | Area    | Height | Area %  | Height % |
|-------|-----------|---------|--------|---------|----------|
| 1     | 9.527     | 2955263 | 228575 | 96.263  | 96.292   |
| 2     | 10.517    | 114736  | 8801   | 3.737   | 3.708    |
| Total |           | 3069999 | 237376 | 100.000 | 100.000  |

## Racemic **13**

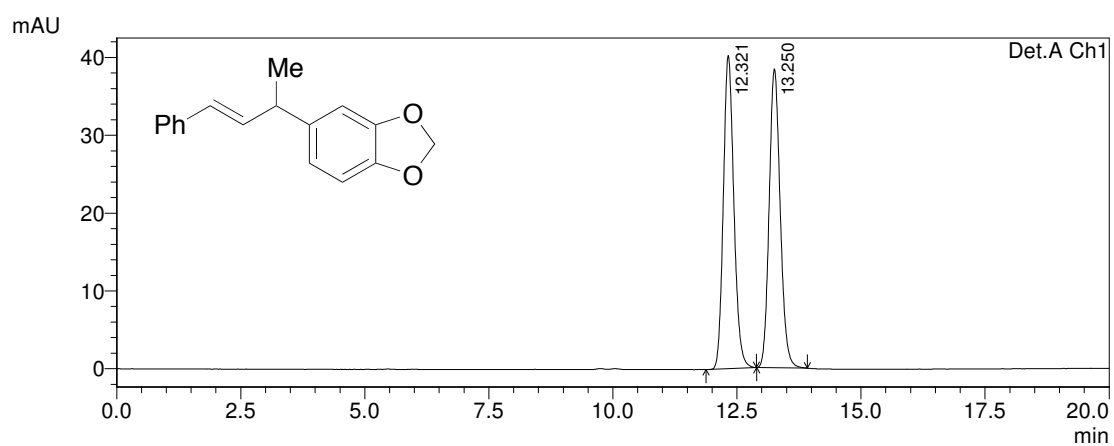

Detector A Ch1 254nm

| Peak# | Ret. Time | Area    | Height | Area %  | Height % |
|-------|-----------|---------|--------|---------|----------|
| 1     | 12.321    | 594232  | 40220  | 49.983  | 51.167   |
| 2     | 13.250    | 594630  | 38386  | 50.017  | 48.833   |
| Total |           | 1188862 | 78605  | 100.000 | 100.000  |

## Enantioenriched **13**, ee = 92%

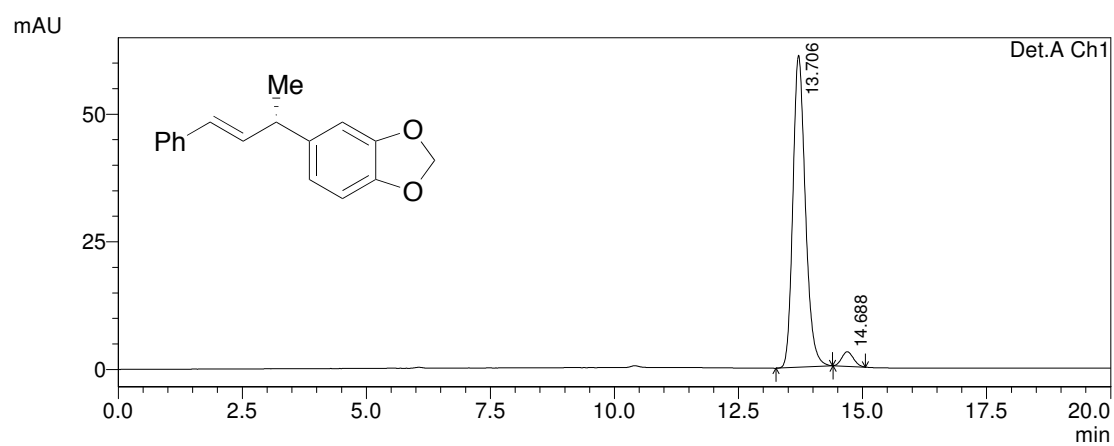

Detector A Ch1 254nm

| Peak# | Ret. Time | Area    | Height | Area %  | Height % |
|-------|-----------|---------|--------|---------|----------|
| 1     | 13.706    | 1067949 | 61099  | 95.807  | 95.549   |
| 2     | 14.688    | 46740   | 2846   | 4.193   | 4.451    |
| Total |           | 1114689 | 63945  | 100.000 | 100.000  |

## Racemic **14**

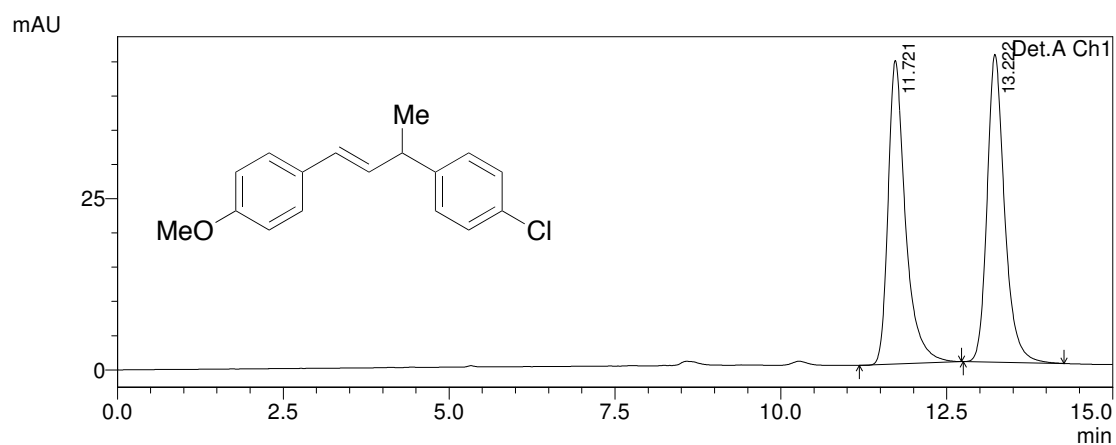

Detector A Ch1 254nm

| Peak# | Ret. Time | Area    | Height | Area %  | Height % |
|-------|-----------|---------|--------|---------|----------|
| 1     | 11.721    | 807561  | 44373  | 49.506  | 49.663   |
| 2     | 13.222    | 823662  | 44976  | 50.494  | 50.337   |
| Total |           | 1631223 | 89349  | 100.000 | 100.000  |

## Enantioenriched **14**, ee = 76%

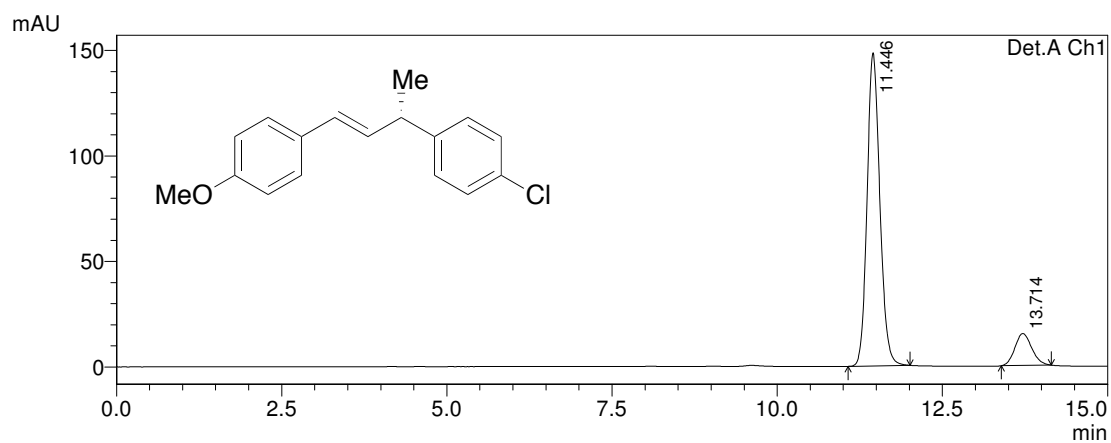

Detector A Ch1 254nm

| Peak# | Ret. Time | Area    | Height | Area %  | Height % |
|-------|-----------|---------|--------|---------|----------|
| 1     | 11.446    | 1995853 | 148409 | 88.115  | 90.733   |
| 2     | 13.714    | 269209  | 15157  | 11.885  | 9.267    |
| Total |           | 2265062 | 163566 | 100.000 | 100.000  |



## Racemic **15**

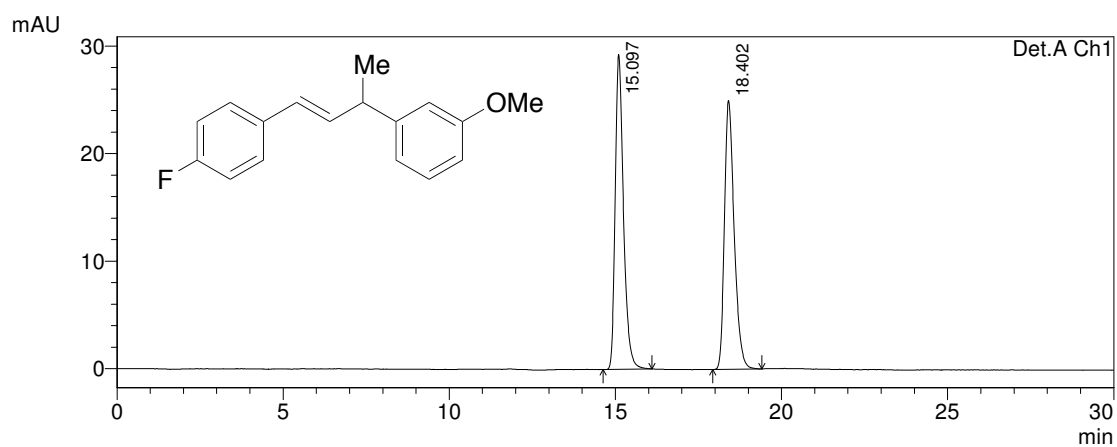

Detector A Ch1 254nm

| Peak# | Ret. Time | Area    | Height | Area %  | Height % |
|-------|-----------|---------|--------|---------|----------|
| 1     | 15.097    | 508175  | 29289  | 49.940  | 53.947   |
| 2     | 18.402    | 509391  | 25003  | 50.060  | 46.053   |
| Total |           | 1017566 | 54292  | 100.000 | 100.000  |

## Enantioenriched **15**, ee = 91%

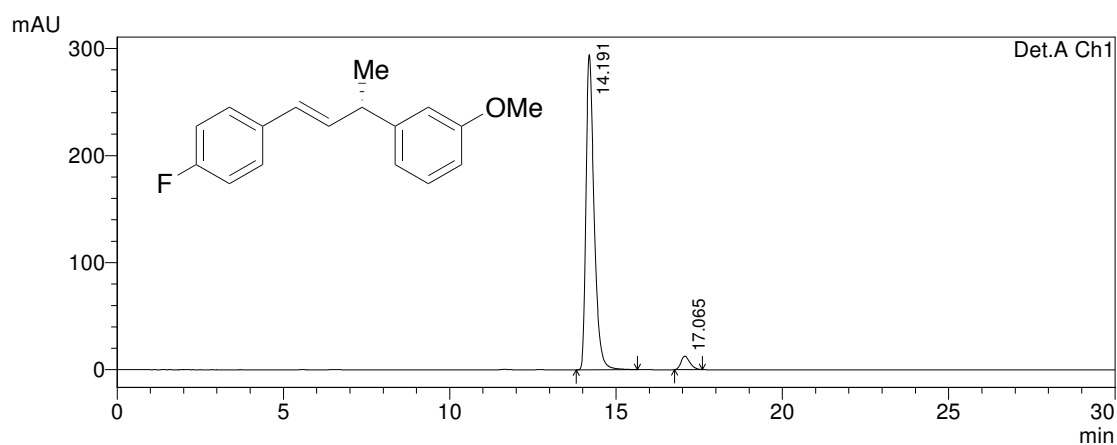

Detector A Ch1 254nm

| Peak# | Ret. Time | Area    | Height | Area %  | Height % |
|-------|-----------|---------|--------|---------|----------|
| 1     | 14.191    | 5000569 | 294197 | 95.503  | 95.887   |
| 2     | 17.065    | 235491  | 12621  | 4.497   | 4.113    |
| Total |           | 5236060 | 306818 | 100.000 | 100.000  |

## Racemic **16**

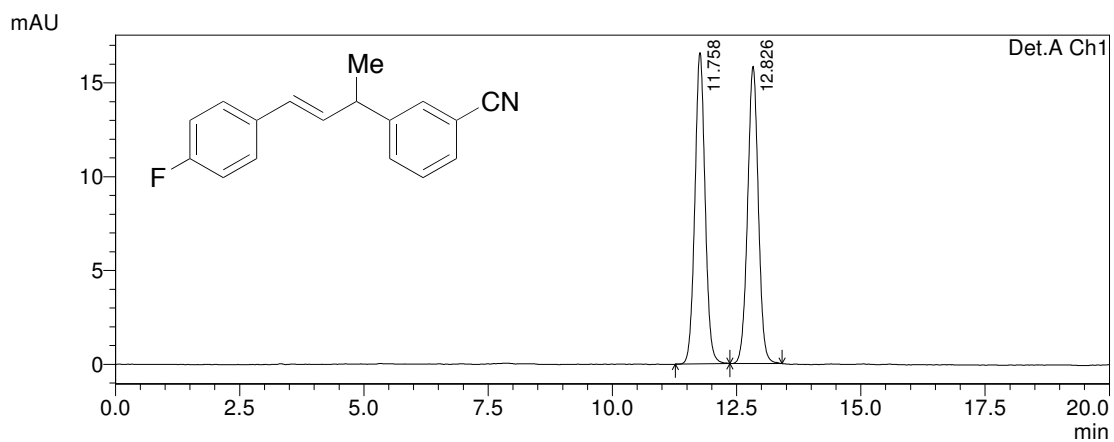

Detector A Ch1 254nm

| Peak# | Ret. Time | Area   | Height | Area %  | Height % |
|-------|-----------|--------|--------|---------|----------|
| 1     | 11.758    | 237836 | 16587  | 49.983  | 51.145   |
| 2     | 12.826    | 237998 | 15845  | 50.017  | 48.855   |
| Total |           | 475834 | 32432  | 100.000 | 100.000  |

## Enantioenriched **16**, ee = 96%

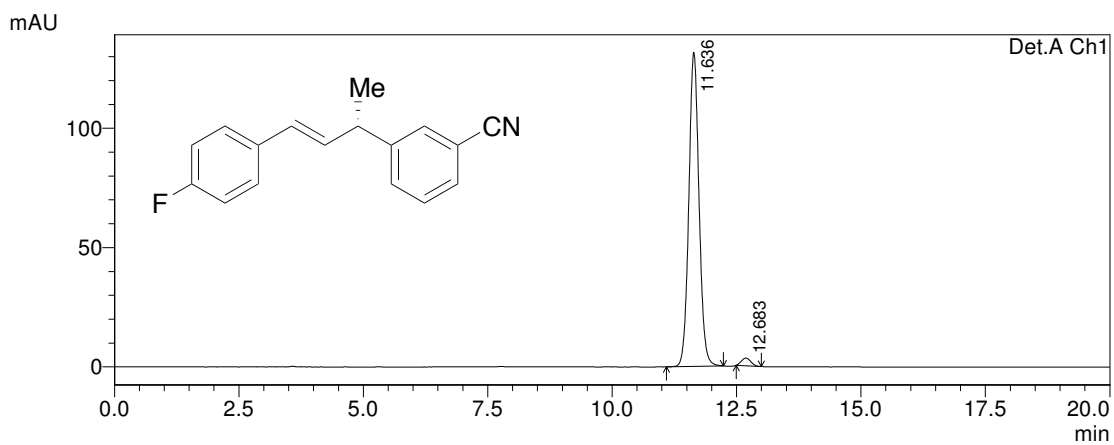

Detector A Ch1 254nm

| Peak# | Ret. Time | Area    | Height | Area %  | Height % |
|-------|-----------|---------|--------|---------|----------|
| 1     | 11.636    | 1878029 | 131646 | 97.804  | 97.592   |
| 2     | 12.683    | 42169   | 3248   | 2.196   | 2.408    |
| Total |           | 1920198 | 134894 | 100.000 | 100.000  |

## Racemic **17**

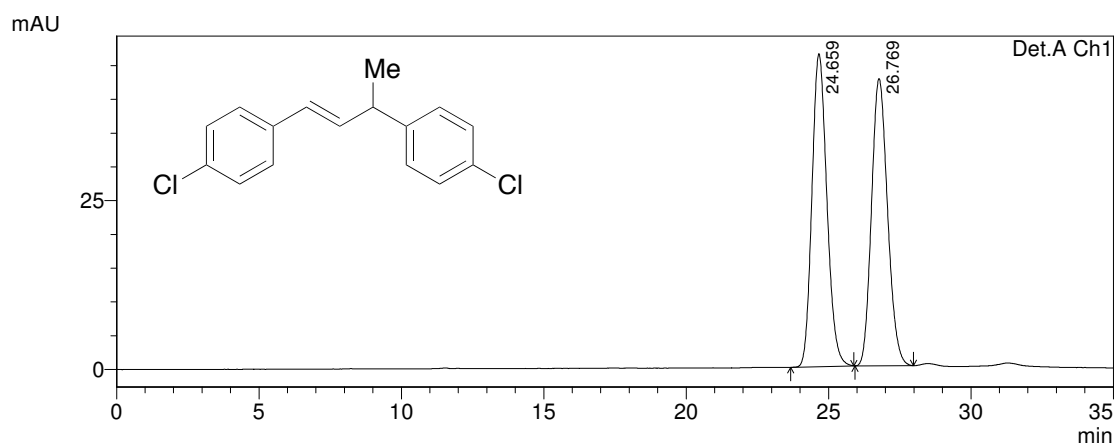

Detector A Ch1 254nm

| Peak# | Ret. Time | Area    | Height | Area %  | Height % |
|-------|-----------|---------|--------|---------|----------|
| 1     | 24.659    | 1689765 | 46329  | 50.349  | 52.130   |
| 2     | 26.769    | 1666345 | 42543  | 49.651  | 47.870   |
| Total |           | 3356110 | 88872  | 100.000 | 100.000  |

## Enantioenriched **17**, ee = 90%

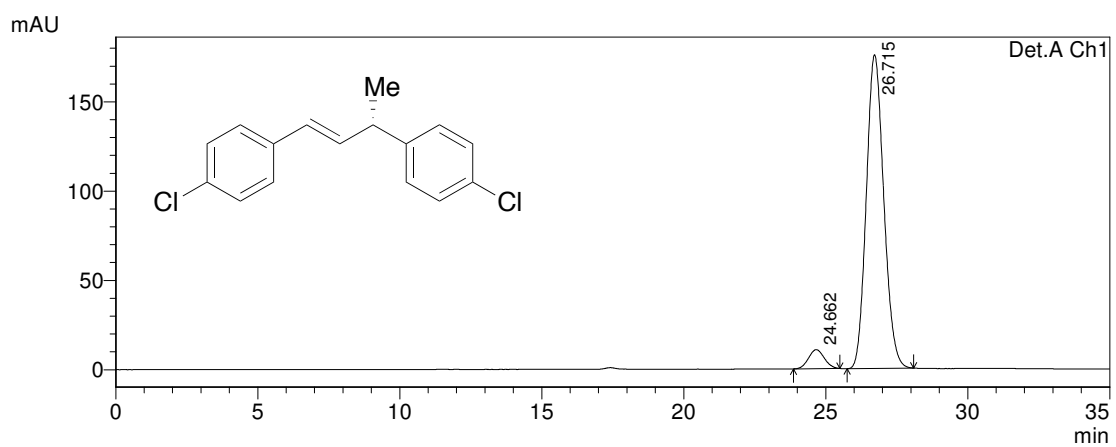

Detector A Ch1 254nm

| Peak# | Ret. Time | Area    | Height | Area %  | Height % |
|-------|-----------|---------|--------|---------|----------|
| 1     | 24.662    | 411573  | 10667  | 5.191   | 5.724    |
| 2     | 26.715    | 7516797 | 175693 | 94.809  | 94.276   |
| Total |           | 7928370 | 186360 | 100.000 | 100.000  |

## Racemic **18**

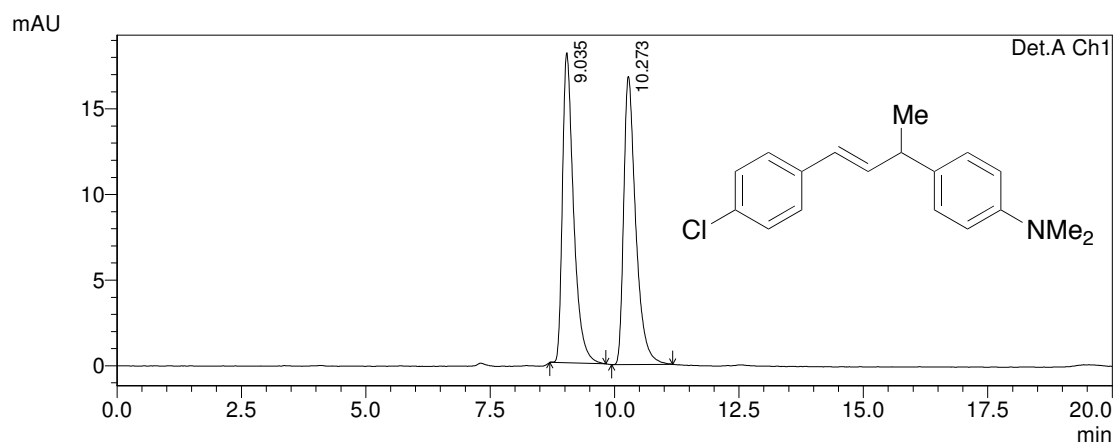

Detector A Ch1 254nm

| Peak# | Ret. Time | Area   | Height | Area %  | Height % |
|-------|-----------|--------|--------|---------|----------|
| 1     | 9.035     | 281831 | 18100  | 49.870  | 51.821   |
| 2     | 10.273    | 283301 | 16828  | 50.130  | 48.179   |
| Total |           | 565132 | 34927  | 100.000 | 100.000  |

## Enantioenriched **18**, ee = 89%

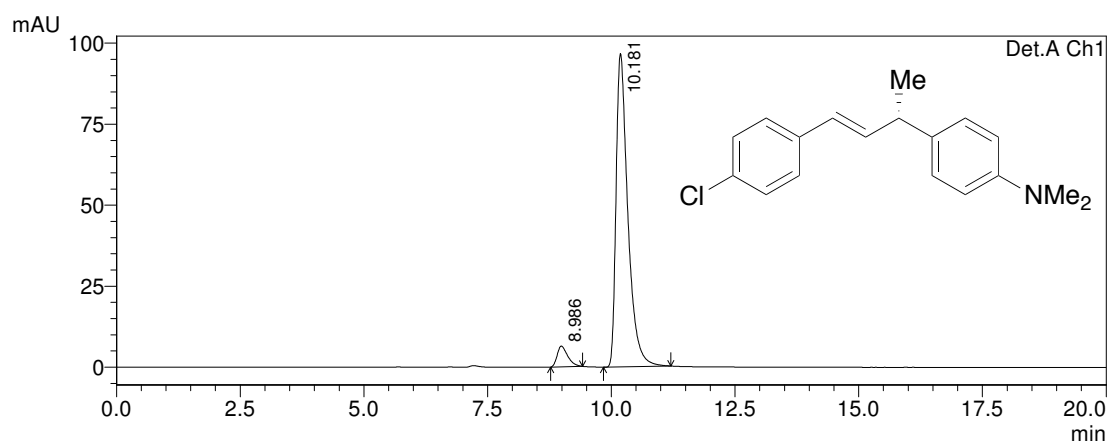

Detector A Ch1 254nm

| Peak# | Ret. Time | Area    | Height | Area %  | Height % |
|-------|-----------|---------|--------|---------|----------|
| 1     | 8.986     | 94596   | 6406   | 5.584   | 6.214    |
| 2     | 10.181    | 1599390 | 96673  | 94.416  | 93.786   |
| Total |           | 1693986 | 103078 | 100.000 | 100.000  |

## Racemic **19**

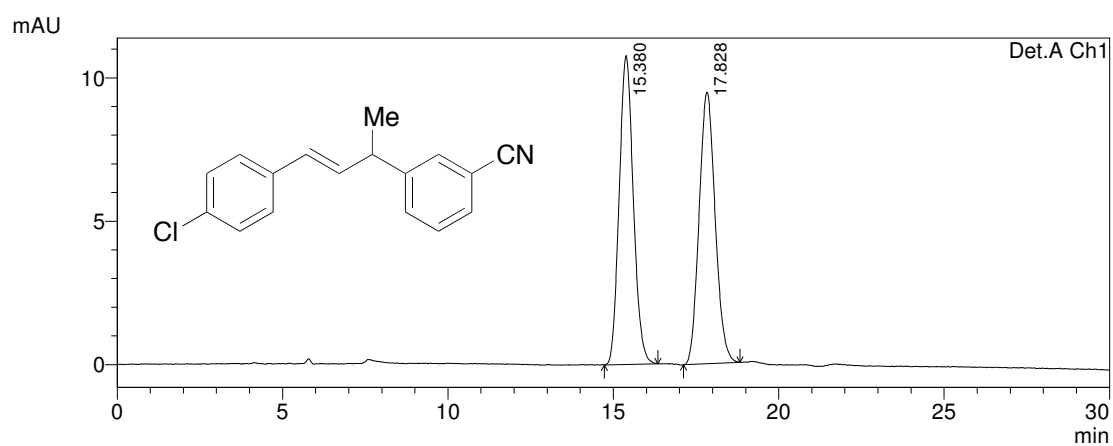

Detector A Ch1 254nm

| Peak# | Ret. Time | Area   | Height | Area %  | Height % |
|-------|-----------|--------|--------|---------|----------|
| 1     | 15.380    | 320415 | 10768  | 50.063  | 53.201   |
| 2     | 17.828    | 319614 | 9472   | 49.937  | 46.799   |
| Total |           | 640029 | 20239  | 100.000 | 100.000  |

## Enantioenriched **19**, ee = 90%

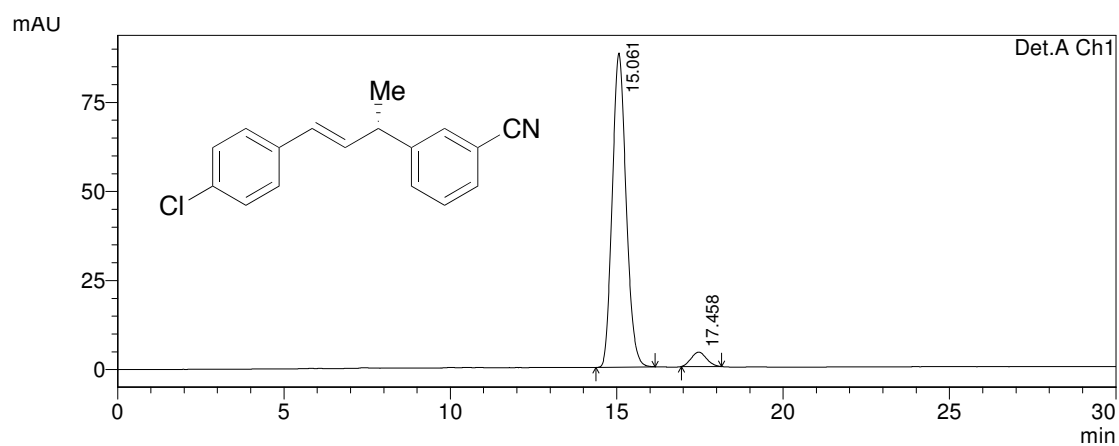

Detector A Ch1 254nm

| Peak# | Ret. Time | Area    | Height | Area %  | Height % |
|-------|-----------|---------|--------|---------|----------|
| 1     | 15.061    | 2546825 | 88146  | 95.154  | 95.602   |
| 2     | 17.458    | 129704  | 4055   | 4.846   | 4.398    |
| Total |           | 2676529 | 92201  | 100.000 | 100.000  |

## Racemic **20**

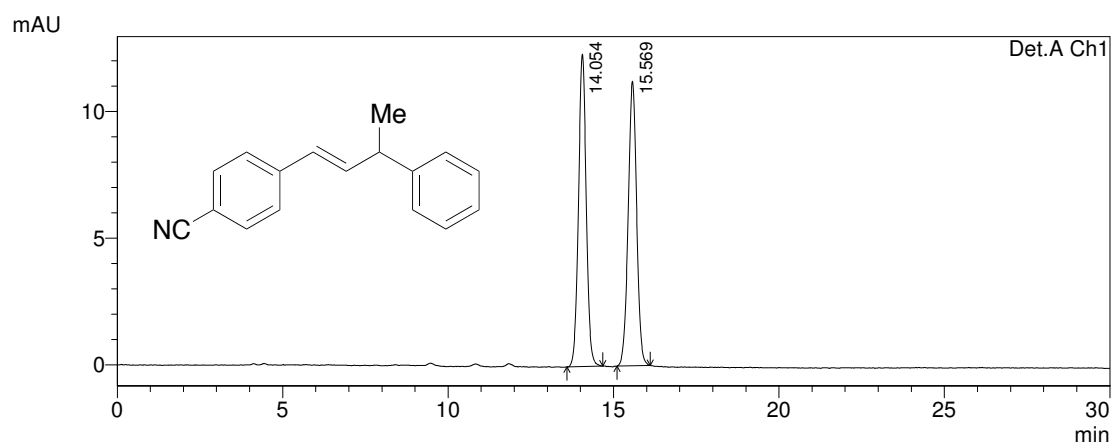

Detector A Ch1 254nm

| Peak# | Ret. Time | Area   | Height | Area %  | Height % |
|-------|-----------|--------|--------|---------|----------|
| 1     | 14.054    | 200511 | 12325  | 50.027  | 52.327   |
| 2     | 15.569    | 200293 | 11229  | 49.973  | 47.673   |
| Total |           | 400804 | 23554  | 100.000 | 100.000  |

## Enantioenriched **20**, ee = 76%

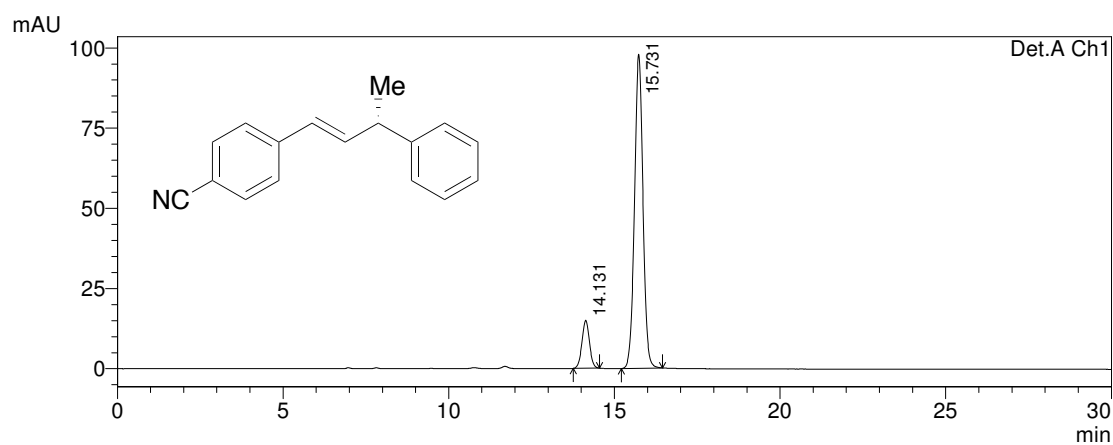

Detector A Ch1 254nm

| Peak# | Ret. Time | Area    | Height | Area %  | Height % |
|-------|-----------|---------|--------|---------|----------|
| 1     | 14.131    | 235932  | 14981  | 11.961  | 13.275   |
| 2     | 15.731    | 1736595 | 97870  | 88.039  | 86.725   |
| Total |           | 1972527 | 112851 | 100.000 | 100.000  |

## Racemic **21**

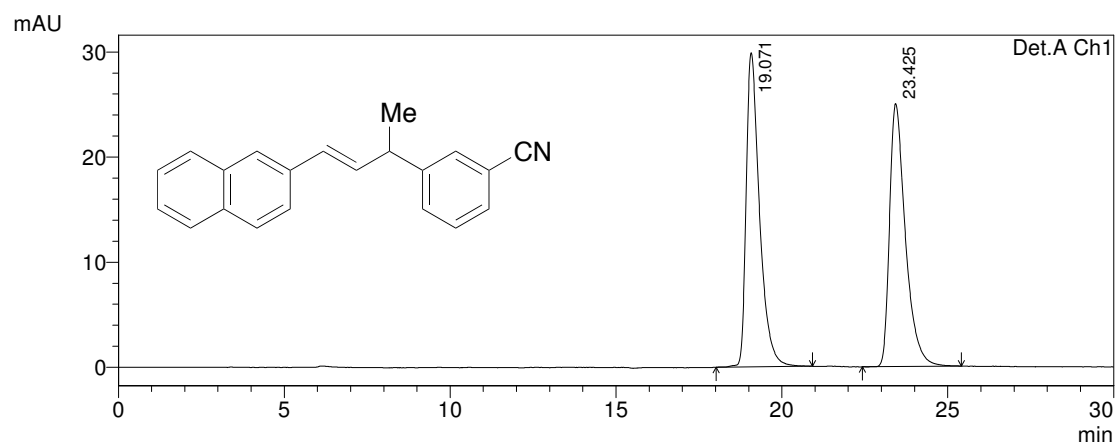

Detector A Ch1 254nm

| Peak# | Ret. Time | Area    | Height | Area %  | Height % |
|-------|-----------|---------|--------|---------|----------|
| 1     | 19.071    | 835245  | 29879  | 50.109  | 54.427   |
| 2     | 23.425    | 831604  | 25018  | 49.891  | 45.573   |
| Total |           | 1666849 | 54897  | 100.000 | 100.000  |

## Enantioenriched **21**, ee = 91%

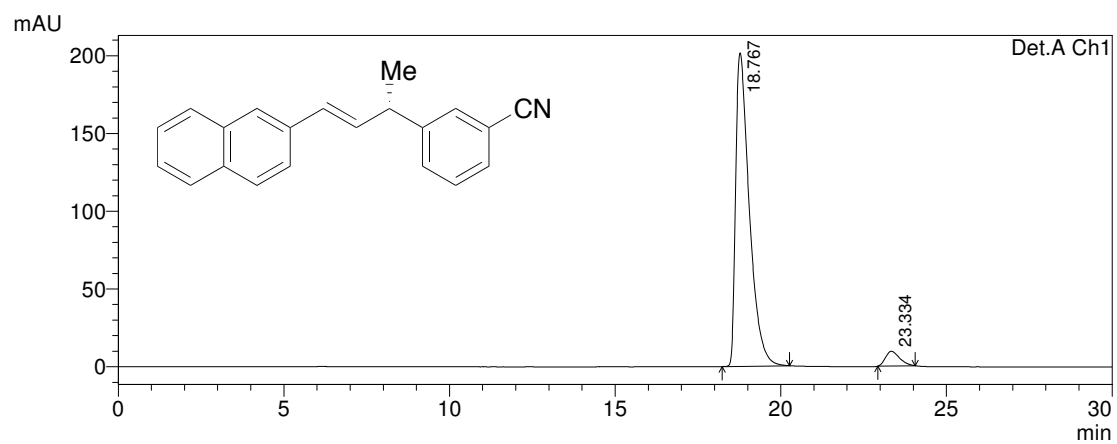

Detector A Ch1 254nm

| Peak# | Ret. Time | Area    | Height | Area %  | Height % |
|-------|-----------|---------|--------|---------|----------|
| 1     | 18.767    | 5778302 | 201515 | 95.422  | 95.541   |
| 2     | 23.334    | 277193  | 9405   | 4.578   | 4.459    |
| Total |           | 6055496 | 210920 | 100.000 | 100.000  |

## Racemic **22**

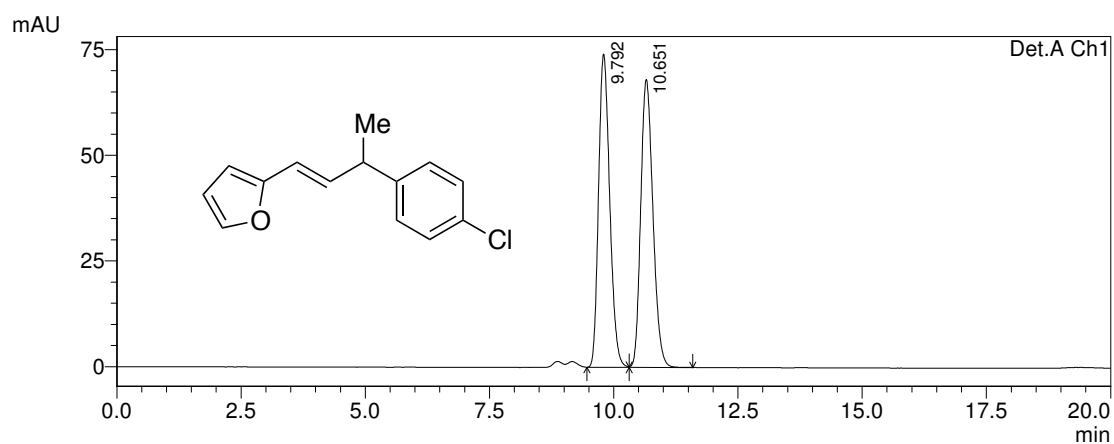

Detector A Ch1 254nm

| Peak# | Ret. Time | Area    | Height | Area %  | Height % |
|-------|-----------|---------|--------|---------|----------|
| 1     | 9.792     | 1156522 | 74059  | 49.899  | 52.103   |
| 2     | 10.651    | 1161221 | 68081  | 50.101  | 47.897   |
| Total |           | 2317742 | 142140 | 100.000 | 100.000  |

## Enantioenriched **22**, ee = 86%

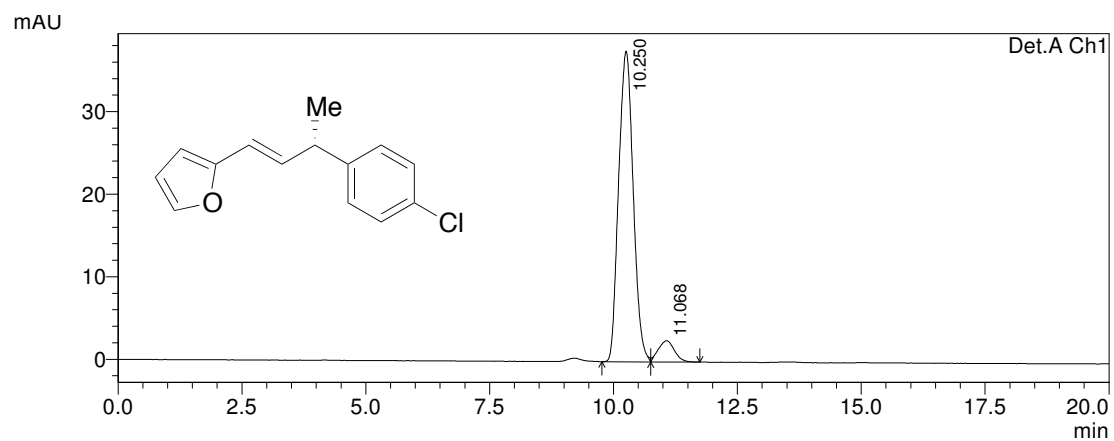

Detector A Ch1 254nm

| Peak# | Ret. Time | Area   | Height | Area %  | Height % |
|-------|-----------|--------|--------|---------|----------|
| 1     | 10.250    | 771297 | 37625  | 92.947  | 93.597   |
| 2     | 11.068    | 58527  | 2574   | 7.053   | 6.403    |
| Total |           | 829824 | 40198  | 100.000 | 100.000  |



## Racemic **23**

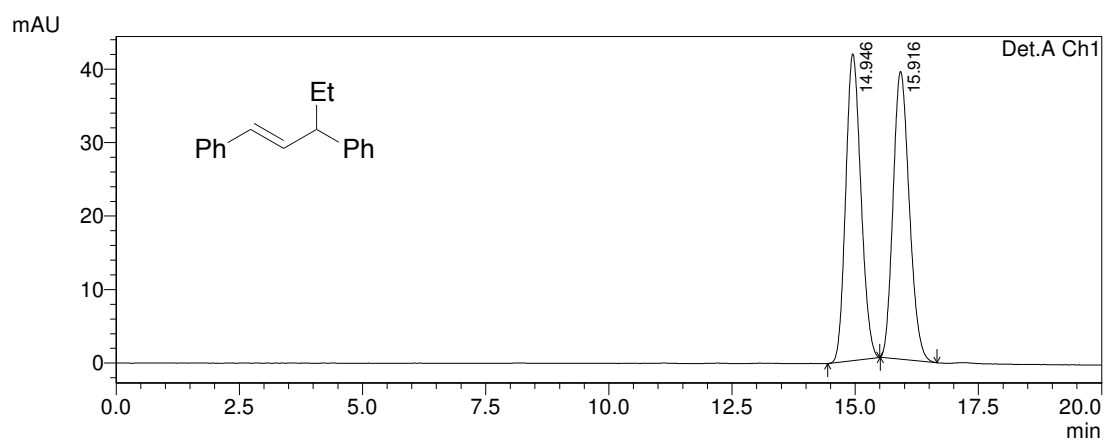

Detector A Ch1 254nm

| Peak# | Ret. Time | Area    | Height | Area %  | Height % |
|-------|-----------|---------|--------|---------|----------|
| 1     | 14.946    | 895104  | 41713  | 49.972  | 51.580   |
| 2     | 15.916    | 896105  | 39157  | 50.028  | 48.420   |
| Total |           | 1791209 | 80870  | 100.000 | 100.000  |

## Enantioenriched **23**, ee = 82%

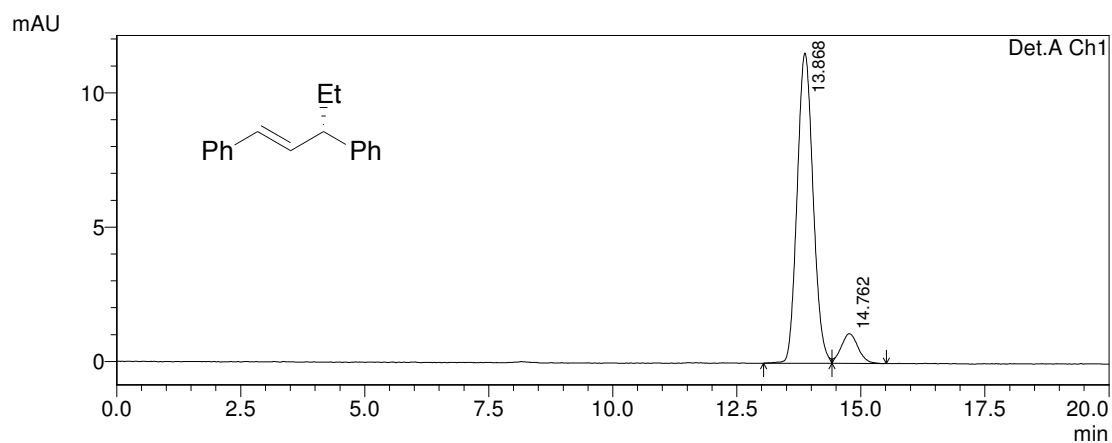

Detector A Ch1 254nm

| Peak# | Ret. Time | Area   | Height | Area %  | Height % |
|-------|-----------|--------|--------|---------|----------|
| 1     | 13.868    | 258330 | 11546  | 90.794  | 91.272   |
| 2     | 14.762    | 26194  | 1104   | 9.206   | 8.728    |
| Total |           | 284524 | 12650  | 100.000 | 100.000  |

## Racemic **24**

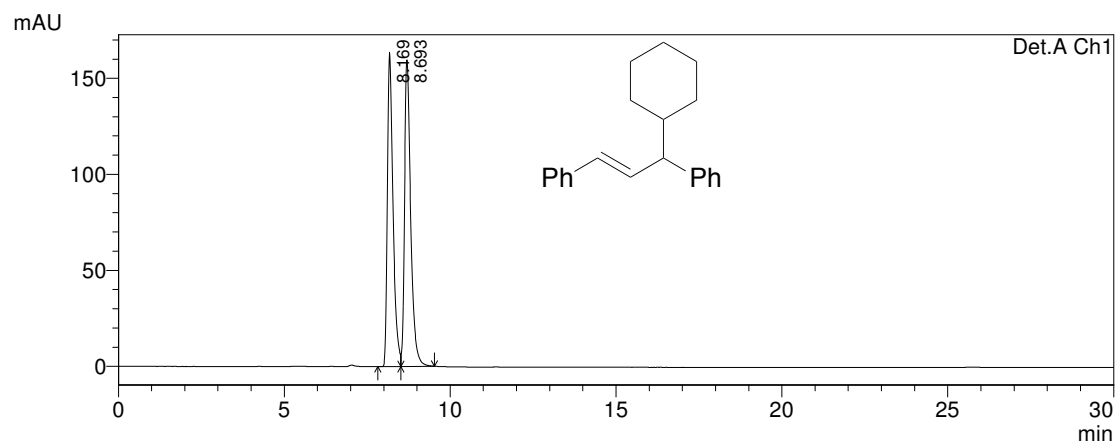

Detector A Ch1 254nm

| Peak# | Ret. Time | Area    | Height | Area %  | Height % |
|-------|-----------|---------|--------|---------|----------|
| 1     | 8.169     | 1940959 | 163447 | 48.814  | 50.644   |
| 2     | 8.693     | 2035273 | 159293 | 51.186  | 49.356   |
| Total |           | 3976232 | 322740 | 100.000 | 100.000  |

## Enantioenriched **24**, ee = 61%

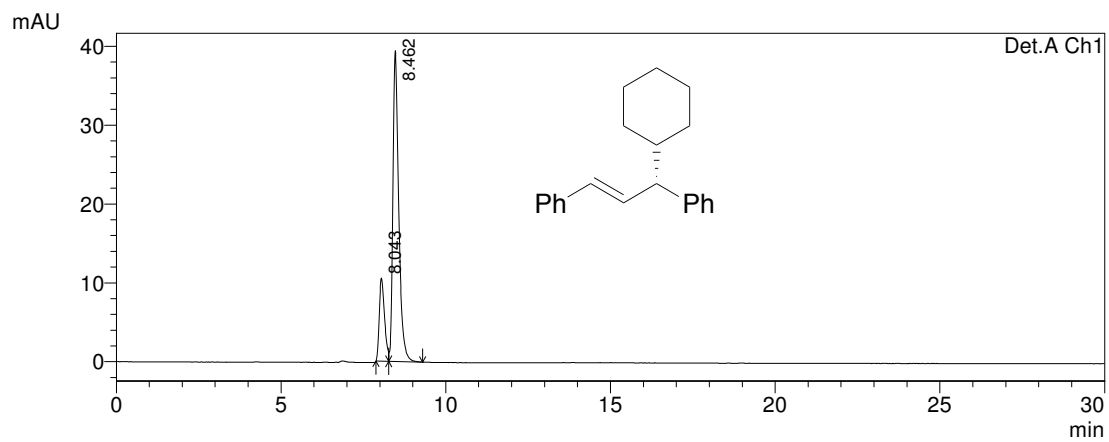

Detector A Ch1 254nm

| Peak# | Ret. Time | Area   | Height | Area %  | Height % |
|-------|-----------|--------|--------|---------|----------|
| 1     | 8.043     | 116720 | 10518  | 19.377  | 21.073   |
| 2     | 8.462     | 485645 | 39394  | 80.623  | 78.927   |
| Total |           | 602365 | 49912  | 100.000 | 100.000  |

## Racemic **1a**

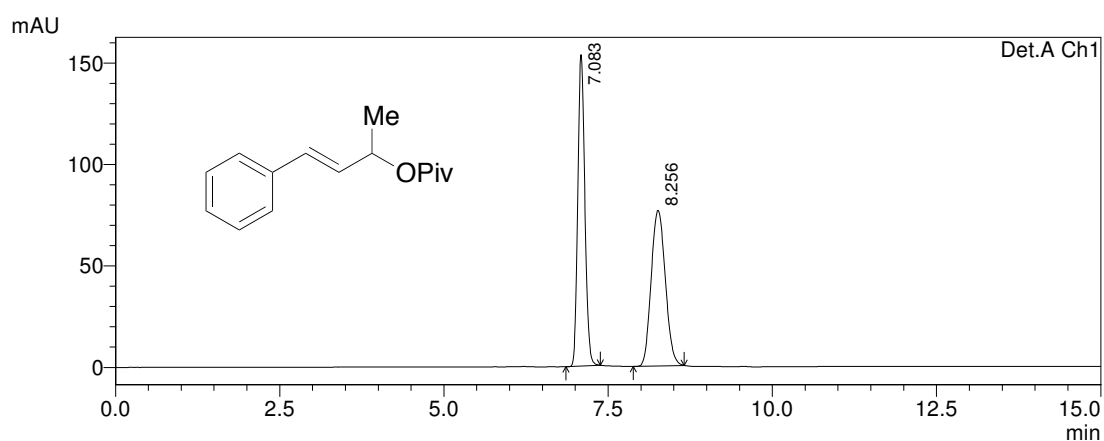

Detector A Ch1 254nm

| Peak# | Ret. Time | Area    | Height | Area %  | Height % |
|-------|-----------|---------|--------|---------|----------|
| 1     | 7.083     | 1148930 | 153378 | 50.011  | 66.649   |
| 2     | 8.256     | 1148419 | 76750  | 49.989  | 33.351   |
| Total |           | 2297349 | 230128 | 100.000 | 100.000  |

## Enantioenriched **1a**, ee = 96%

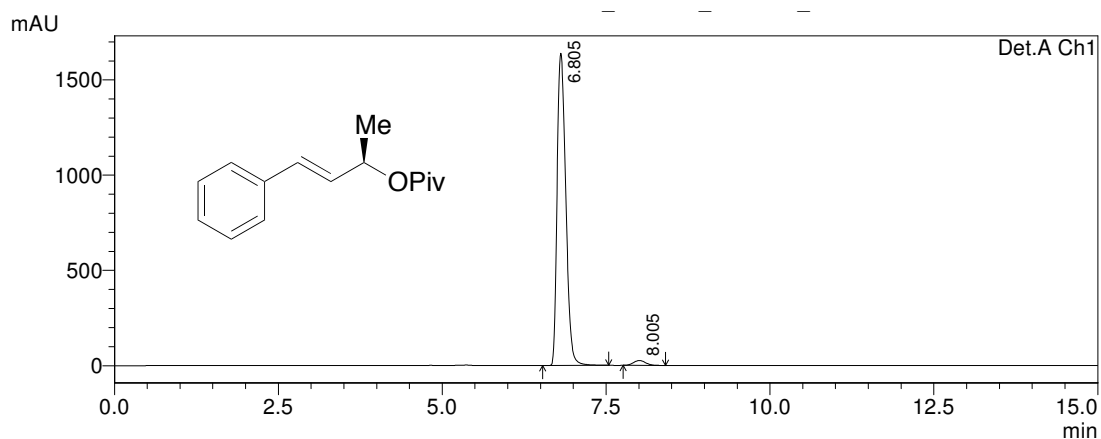

Detector A Ch1 254nm

| Peak# | Ret. Time | Area     | Height  | Area %  | Height % |
|-------|-----------|----------|---------|---------|----------|
| 1     | 6.805     | 15085485 | 1638394 | 97.867  | 98.461   |
| 2     | 8.005     | 328742   | 25601   | 2.133   | 1.539    |
| Total |           | 15414227 | 1663995 | 100.000 | 100.000  |

## Racemic **1b**

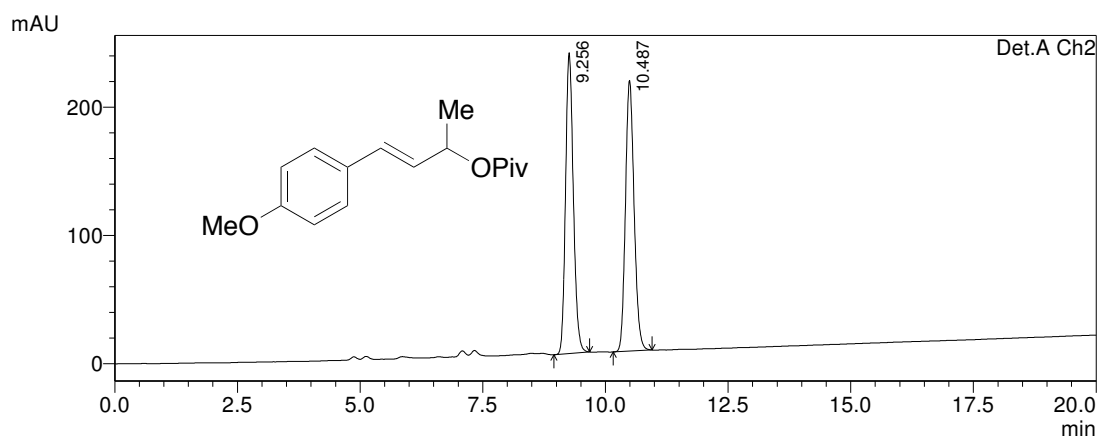

Detector A Ch2 210nm

| Peak# | Ret. Time | Area    | Height | Area %  | Height % |
|-------|-----------|---------|--------|---------|----------|
| 1     | 9.256     | 2587105 | 234367 | 50.020  | 52.612   |
| 2     | 10.487    | 2585032 | 211095 | 49.980  | 47.388   |
| Total |           | 5172137 | 445462 | 100.000 | 100.000  |

## Enantioenriched **1b**, ee = 82%

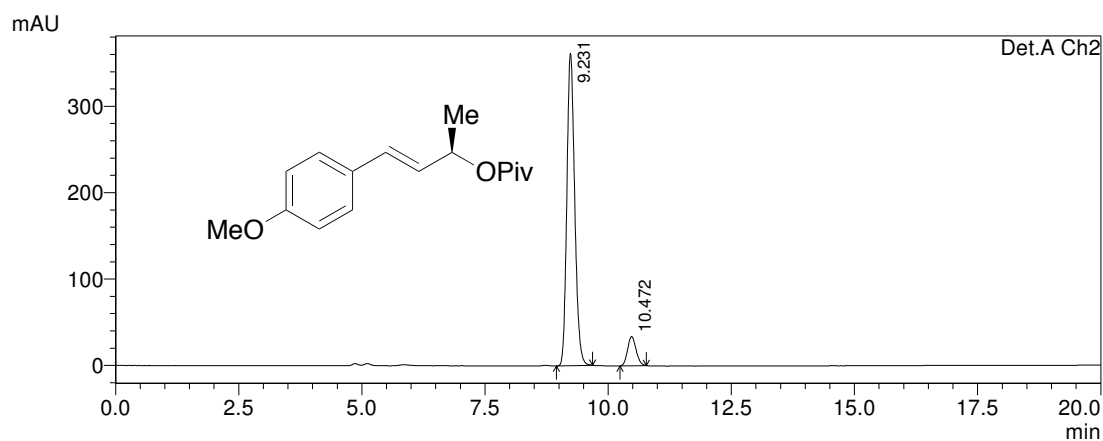

Detector A Ch2 210nm

| Peak# | Ret. Time | Area    | Height | Area %  | Height % |
|-------|-----------|---------|--------|---------|----------|
| 1     | 9.231     | 4008739 | 361390 | 90.806  | 91.434   |
| 2     | 10.472    | 405887  | 33855  | 9.194   | 8.566    |
| Total |           | 4414626 | 395245 | 100.000 | 100.000  |

## Racemic **1c**

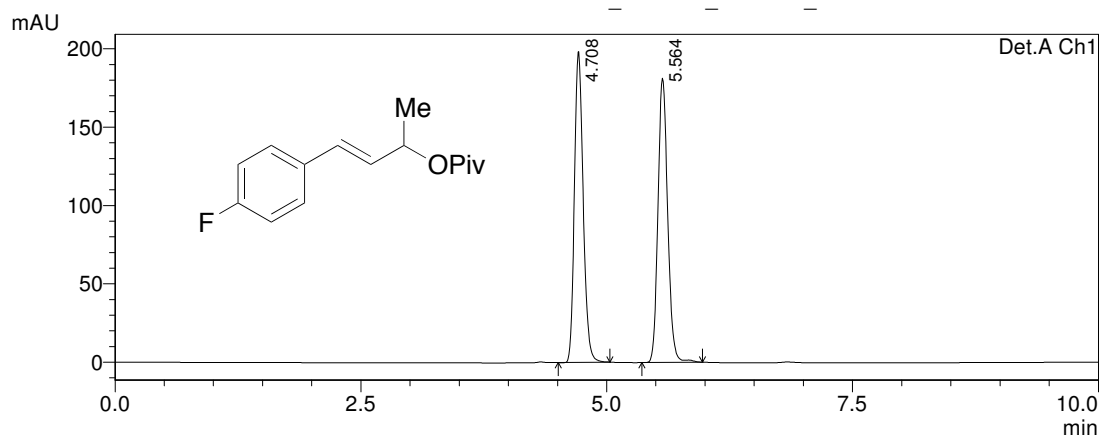

Detector A Ch1 254nm

| Peak# | Ret. Time | Area    | Height | Area %  | Height % |
|-------|-----------|---------|--------|---------|----------|
| 1     | 4.708     | 1233223 | 198303 | 49.818  | 52.220   |
| 2     | 5.564     | 1242245 | 181443 | 50.182  | 47.780   |
| Total |           | 2475468 | 379746 | 100.000 | 100.000  |

## Enantioenriched **1c**, ee = 98%

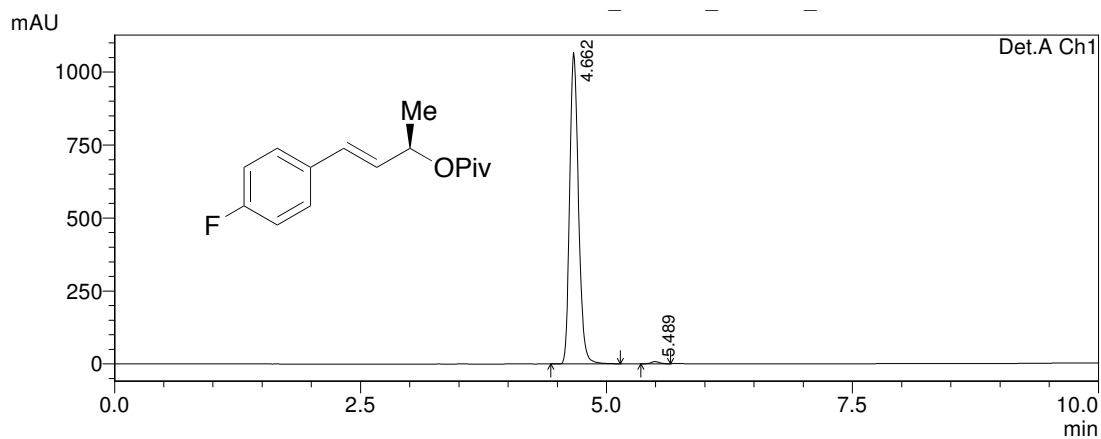

Detector A Ch1 254nm

| Peak# | Ret. Time | Area    | Height  | Area %  | Height % |
|-------|-----------|---------|---------|---------|----------|
| 1     | 4.662     | 6650232 | 1066854 | 99.298  | 99.295   |
| 2     | 5.489     | 47028   | 7574    | 0.702   | 0.705    |
| Total |           | 6697260 | 1074428 | 100.000 | 100.000  |

## Racemic **1d**

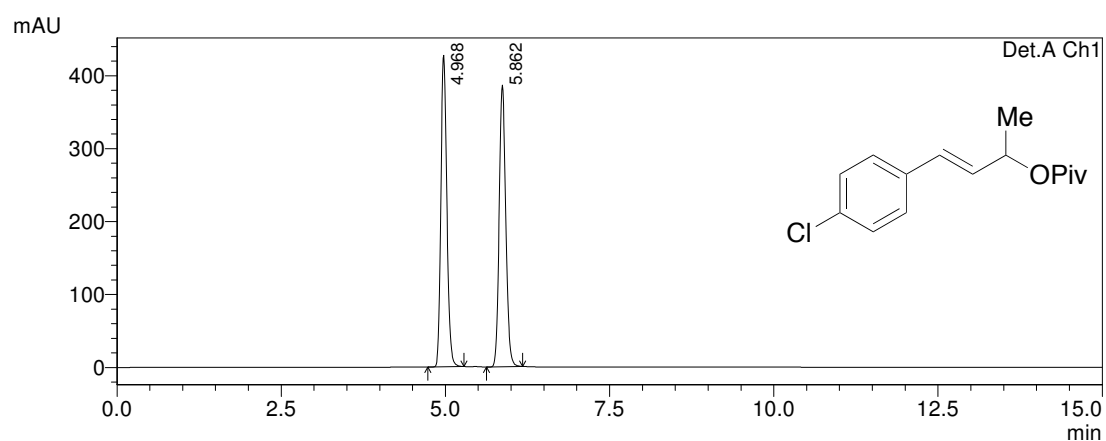

Detector A Ch1 254nm

| Peak# | Ret. Time | Area    | Height | Area %  | Height % |
|-------|-----------|---------|--------|---------|----------|
| 1     | 4.968     | 2698912 | 427008 | 50.039  | 52.519   |
| 2     | 5.862     | 2694758 | 386051 | 49.961  | 47.481   |
| Total |           | 5393670 | 813059 | 100.000 | 100.000  |

## Enantioenriched **1d**, ee = 96%

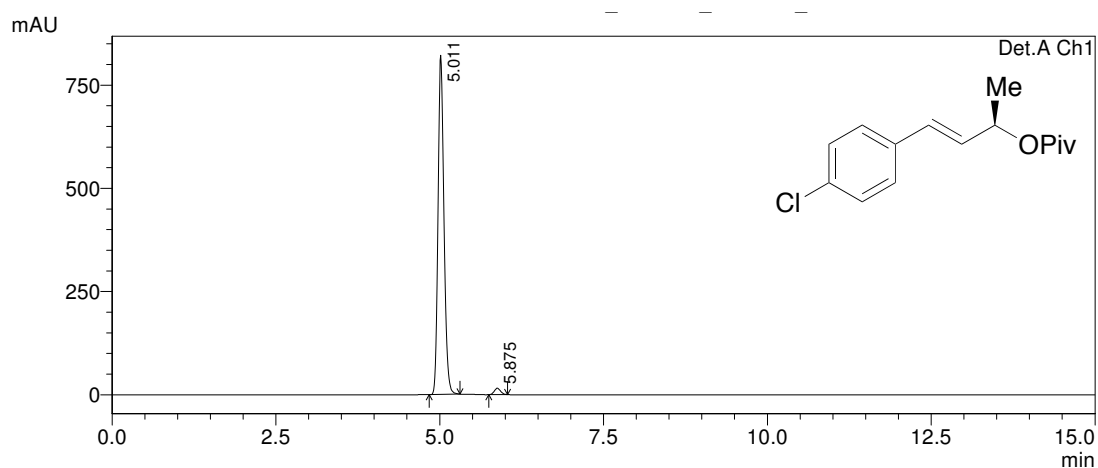

Detector A Ch1 254nm

| Peak# | Ret. Time | Area    | Height | Area %  | Height % |
|-------|-----------|---------|--------|---------|----------|
| 1     | 5.011     | 5220879 | 821541 | 98.026  | 98.146   |
| 2     | 5.875     | 105126  | 15518  | 1.974   | 1.854    |
| Total |           | 5326005 | 837059 | 100.000 | 100.000  |

## Racemic **1e**

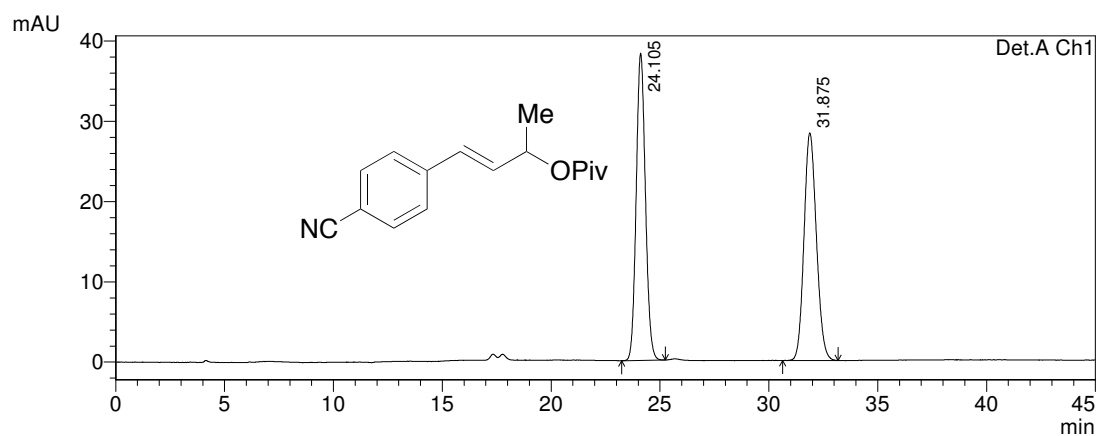

Detector A Ch1 254nm

| Peak# | Ret. Time | Area    | Height | Area %  | Height % |
|-------|-----------|---------|--------|---------|----------|
| 1     | 24.105    | 1125881 | 38286  | 50.089  | 57.434   |
| 2     | 31.875    | 1121870 | 28374  | 49.911  | 42.566   |
| Total |           | 2247751 | 66661  | 100.000 | 100.000  |

## Enantioenriched **1e**, ee = 80%

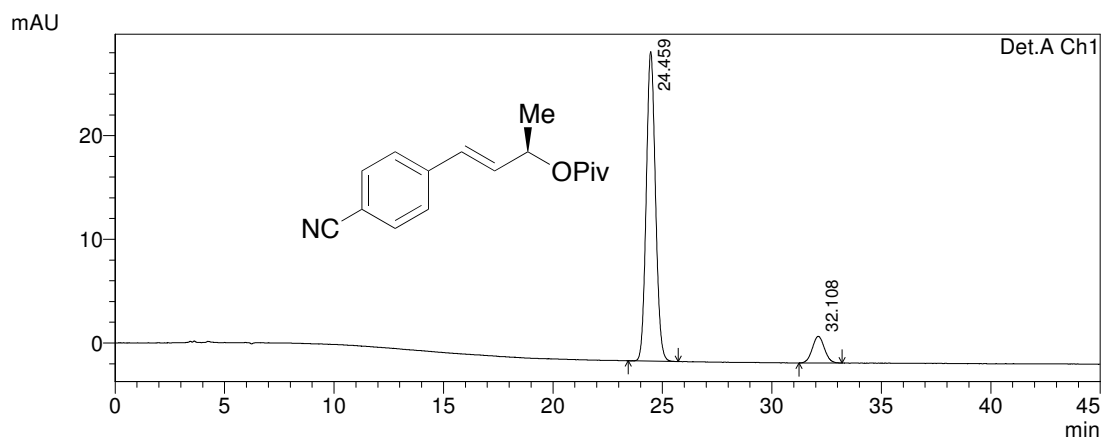

Detector A Ch1 254nm

| Peak# | Ret. Time | Area   | Height | Area %  | Height % |
|-------|-----------|--------|--------|---------|----------|
| 1     | 24.459    | 874057 | 29841  | 89.821  | 92.069   |
| 2     | 32.108    | 99056  | 2571   | 10.179  | 7.931    |
| Total |           | 973112 | 32411  | 100.000 | 100.000  |

## Racemic **1f**

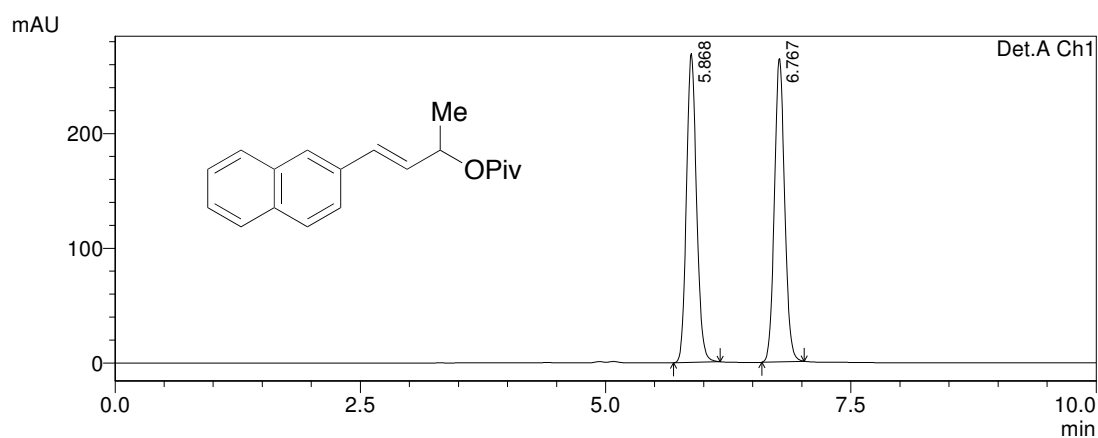

Detector A Ch1 254nm

| Peak# | Ret. Time | Area    | Height | Area %  | Height % |
|-------|-----------|---------|--------|---------|----------|
| 1     | 5.868     | 1927376 | 269194 | 50.115  | 50.459   |
| 2     | 6.767     | 1918496 | 264295 | 49.885  | 49.541   |
| Total |           | 3845872 | 533490 | 100.000 | 100.000  |

## Enantioenriched **1f**, ee = 96%

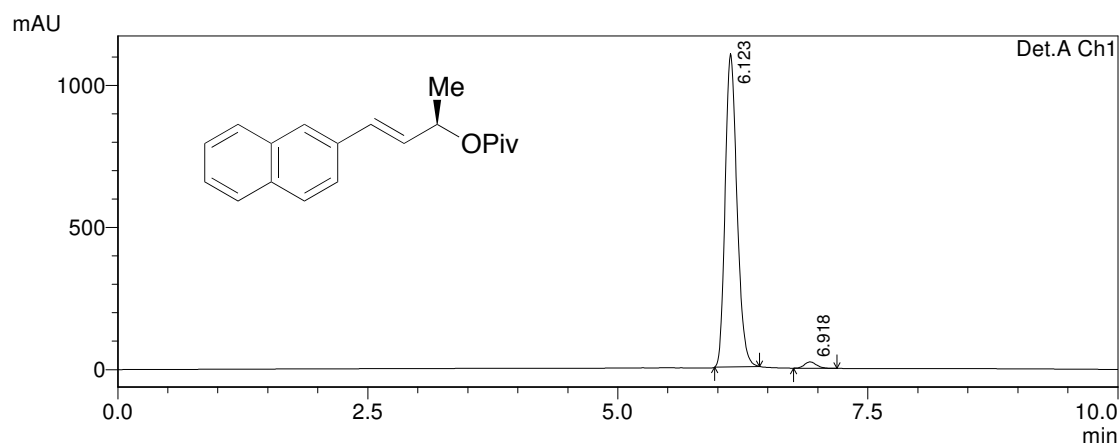

Detector A Ch1 254nm

| Peak# | Ret. Time | Area    | Height  | Area %  | Height % |
|-------|-----------|---------|---------|---------|----------|
| 1     | 6.123     | 9044130 | 1102126 | 97.972  | 98.006   |
| 2     | 6.918     | 187203  | 22422   | 2.028   | 1.994    |
| Total |           | 9231333 | 1124548 | 100.000 | 100.000  |



## Racemic **1g**

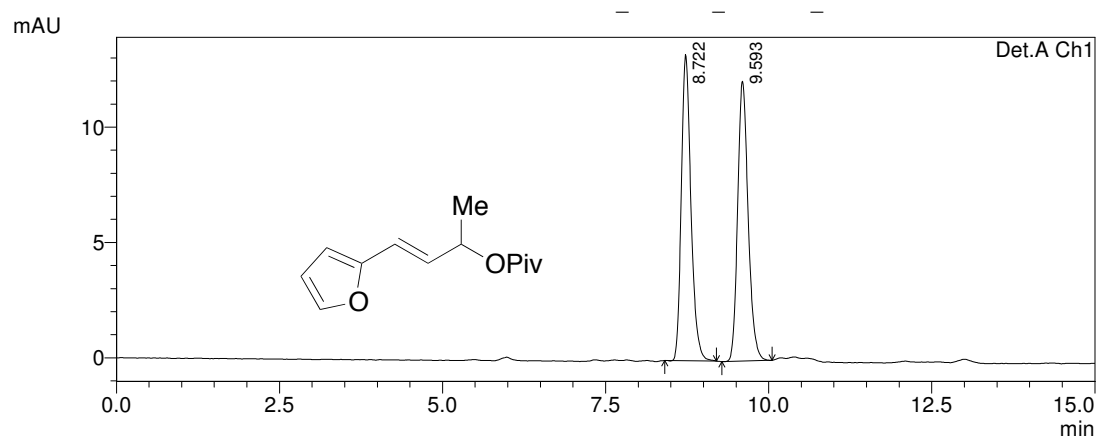

0

Detector A Ch1 254nm

| Peak# | Ret. Time | Area   | Height | Area %  | Height % |
|-------|-----------|--------|--------|---------|----------|
| 1     | 8.722     | 136201 | 13271  | 50.103  | 52.242   |
| 2     | 9.593     | 135642 | 12132  | 49.897  | 47.758   |
| Total |           | 271843 | 25403  | 100.000 | 100.000  |

## Enantioenriched **1g**, ee = 97%

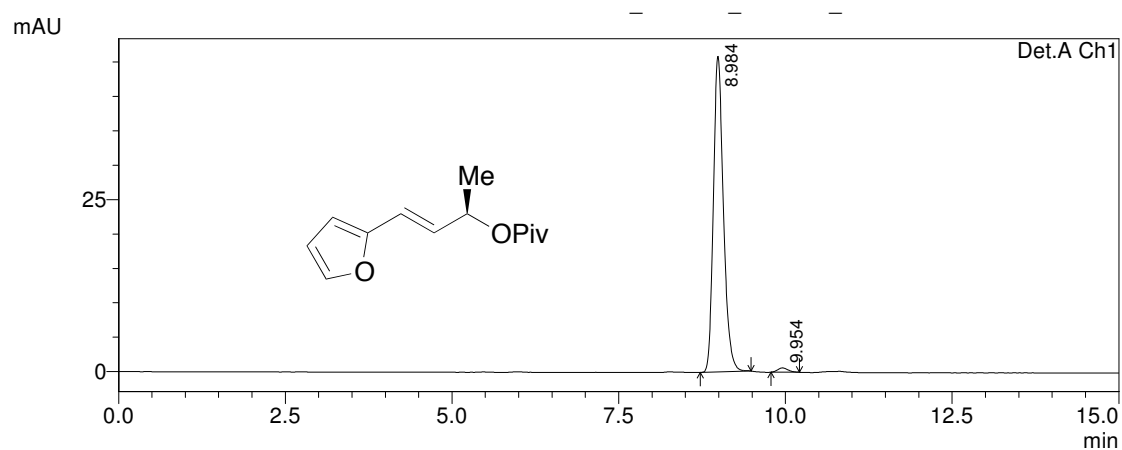

Detector A Ch1 254nm

| Peak# | Ret. Time | Area   | Height | Area %  | Height % |
|-------|-----------|--------|--------|---------|----------|
| 1     | 8.984     | 480703 | 45863  | 98.617  | 98.634   |
| 2     | 9.954     | 6741   | 635    | 1.383   | 1.366    |
| Total |           | 487444 | 46498  | 100.000 | 100.000  |

## Racemic **1h**

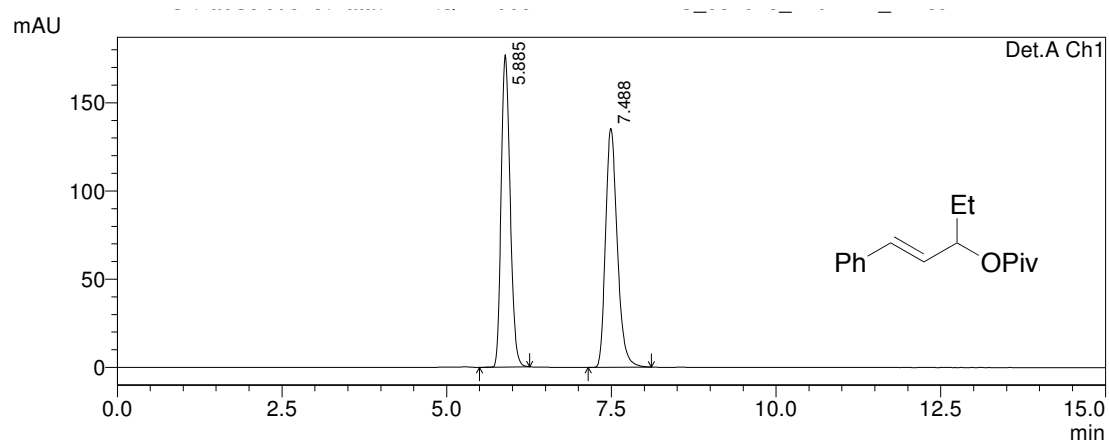

Detector A Ch1 254nm

| Peak# | Ret. Time | Area    | Height | Area %  | Height % |
|-------|-----------|---------|--------|---------|----------|
| 1     | 5.885     | 1677000 | 176994 | 50.017  | 56.641   |
| 2     | 7.488     | 1675869 | 135488 | 49.983  | 43.359   |
| Total |           | 3352870 | 312481 | 100.000 | 100.000  |

## Enantioenriched **1h**, ee = 90%

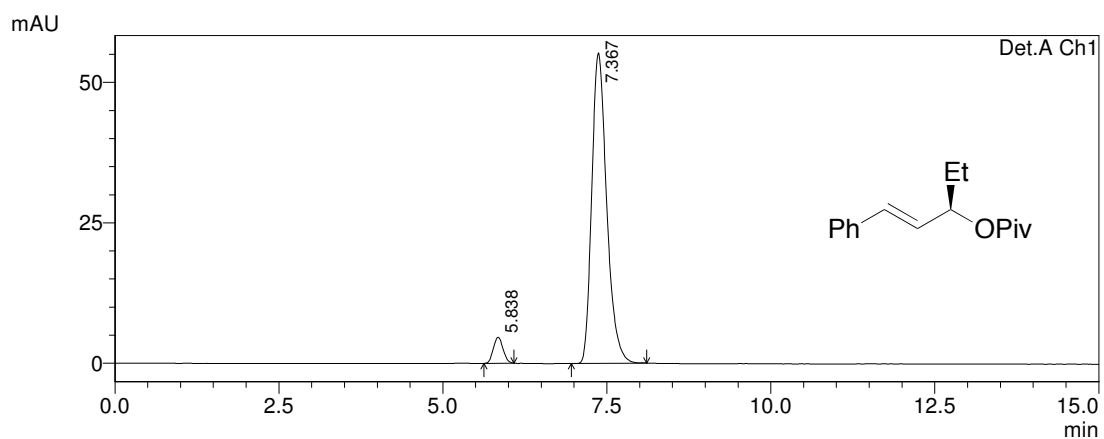

Detector A Ch1 254nm

| Peak# | Ret. Time | Area   | Height | Area %  | Height % |
|-------|-----------|--------|--------|---------|----------|
| 1     | 5.838     | 47604  | 4634   | 5.158   | 7.735    |
| 2     | 7.367     | 875250 | 55270  | 94.842  | 92.265   |
| Total |           | 922854 | 59903  | 100.000 | 100.000  |

## Racemic **1i**

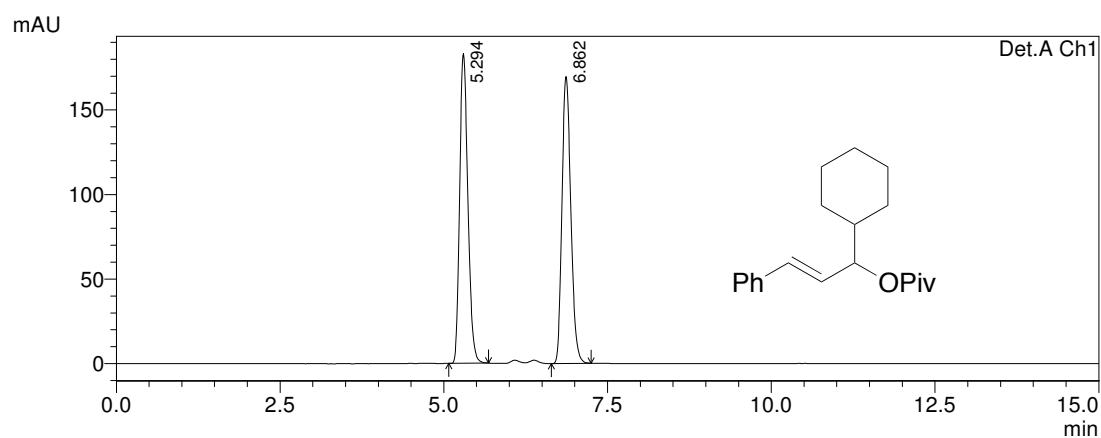

Detector A Ch1 254nm

| Peak# | Ret. Time | Area    | Height | Area %  | Height % |
|-------|-----------|---------|--------|---------|----------|
| 1     | 5.294     | 1600071 | 183097 | 50.004  | 51.903   |
| 2     | 6.862     | 1599846 | 169669 | 49.996  | 48.097   |
| Total |           | 3199916 | 352766 | 100.000 | 100.000  |

## Enantioenriched **1i**, ee = 87%

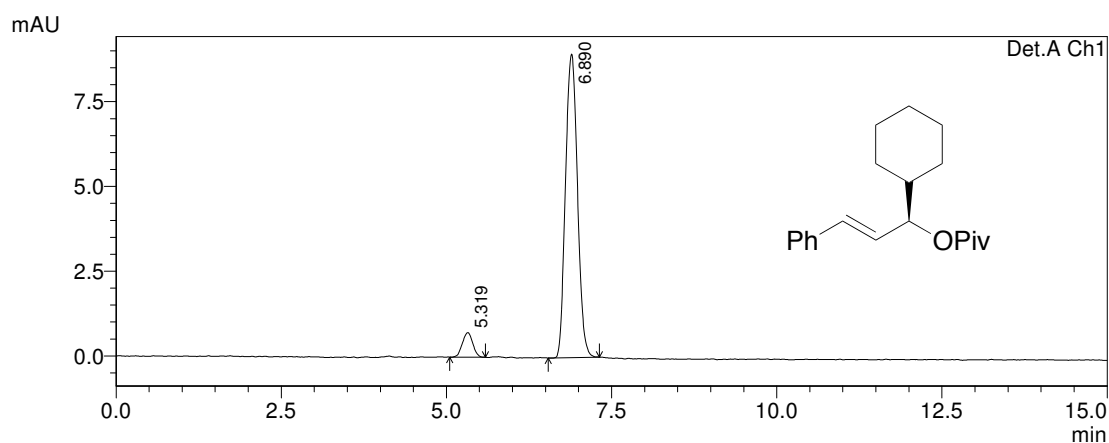

Detector A Ch1 254nm

| Peak# | Ret. Time | Area   | Height | Area %  | Height % |
|-------|-----------|--------|--------|---------|----------|
| 1     | 5.319     | 7957   | 726    | 6.585   | 7.505    |
| 2     | 6.890     | 112885 | 8953   | 93.415  | 92.495   |
| Total |           | 120842 | 9680   | 100.000 | 100.000  |

### Racemic **S-1e**

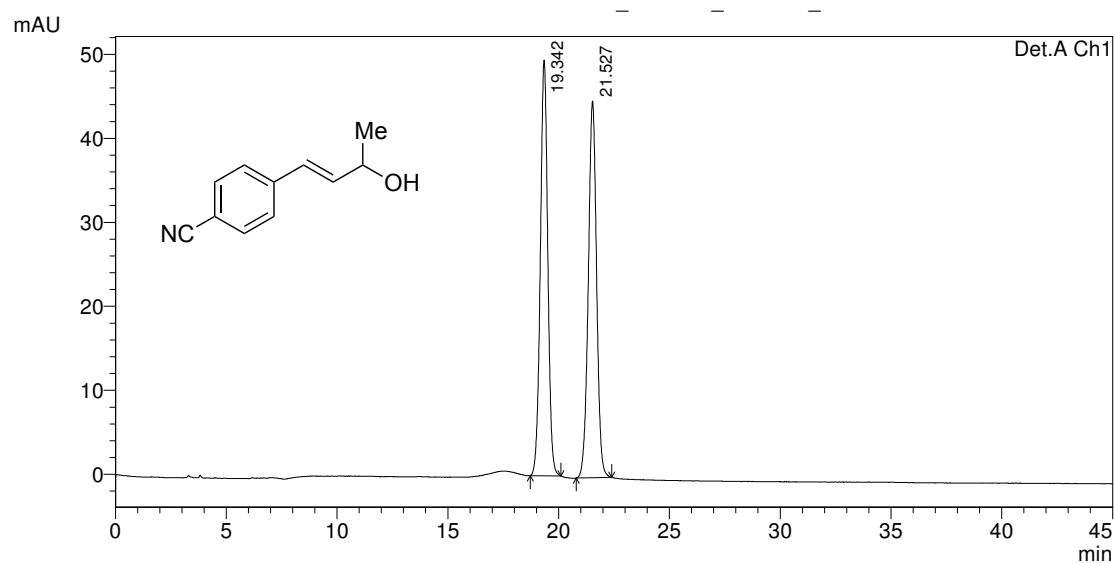

Detector A Ch1 254nm

| Peak# | Ret. Time | Area    | Height | Area %  | Height % |
|-------|-----------|---------|--------|---------|----------|
| 1     | 19.342    | 1155111 | 49477  | 49.791  | 52.459   |
| 2     | 21.527    | 1164813 | 44838  | 50.209  | 47.541   |
| Total |           | 2319925 | 94314  | 100.000 | 100.000  |

### Enantioenriched **S-1e**, 80% ee

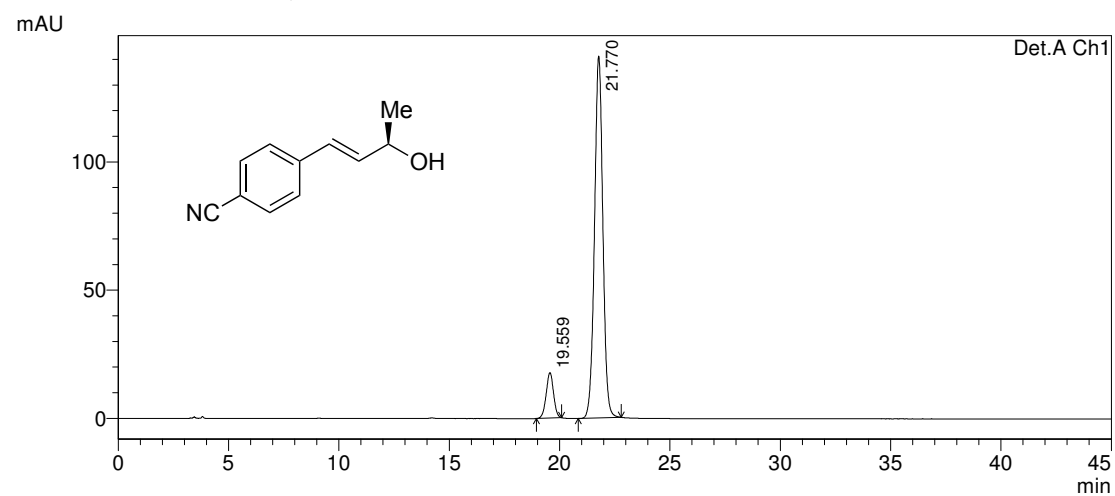

Detector A Ch1 254nm

| Peak# | Ret. Time | Area    | Height | Area %  | Height % |
|-------|-----------|---------|--------|---------|----------|
| 1     | 19.559    | 411243  | 17736  | 9.981   | 11.160   |
| 2     | 21.770    | 3708859 | 141186 | 90.019  | 88.840   |
| Total |           | 4120101 | 158922 | 100.000 | 100.000  |

## Racemic **25**

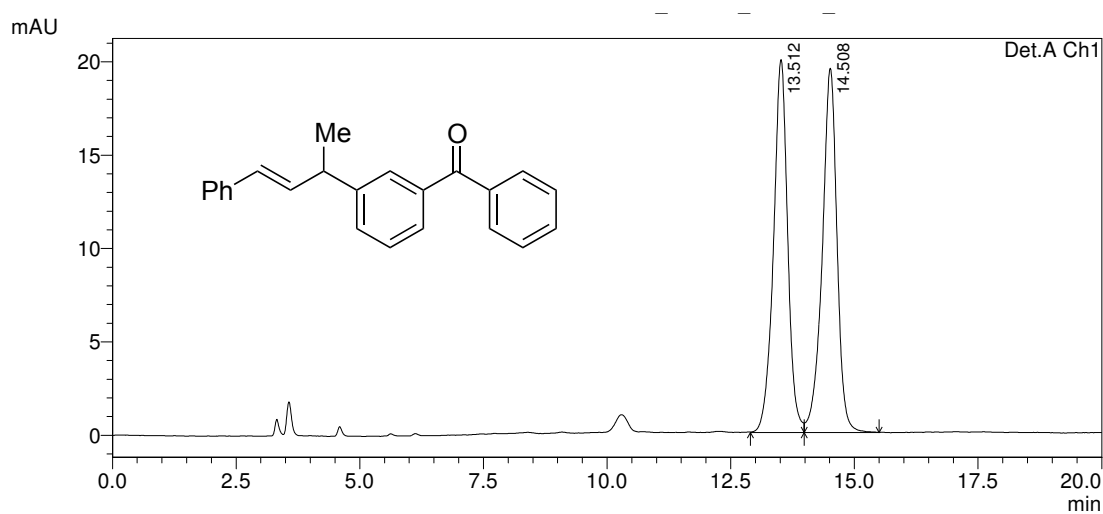

Detector A Ch1 220nm

| Peak# | Ret. Time | Area   | Height | Area %  | Height % |
|-------|-----------|--------|--------|---------|----------|
| 1     | 13.512    | 399033 | 19975  | 49.585  | 50.590   |
| 2     | 14.508    | 405720 | 19509  | 50.415  | 49.410   |
| Total |           | 804753 | 39484  | 100.000 | 100.000  |

## Enantioenriched **25**, 95% ee

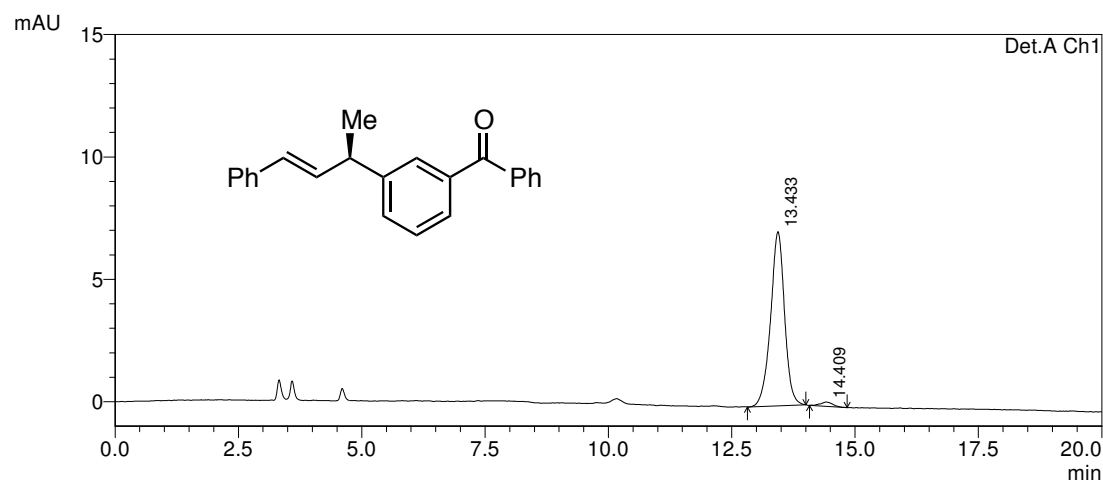

Detector A Ch1 220nm

| Peak# | Ret. Time | Area   | Height | Area %  | Height % |
|-------|-----------|--------|--------|---------|----------|
| 1     | 13.433    | 140135 | 7107   | 97.873  | 97.615   |
| 2     | 14.409    | 3045   | 174    | 2.127   | 2.385    |
| Total |           | 143180 | 7281   | 100.000 | 100.000  |

### Racemic S-29

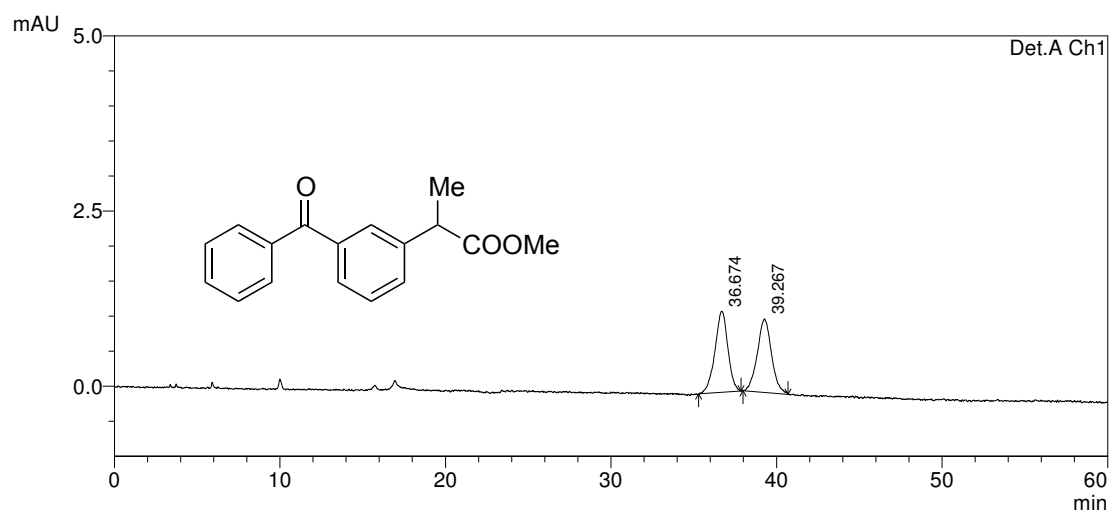

Detector A Ch1 254nm

| Peak# | Ret. Time | Area   | Height | Area %  | Height % |
|-------|-----------|--------|--------|---------|----------|
| 1     | 36.674    | 62988  | 1156   | 50.223  | 52.472   |
| 2     | 39.267    | 62430  | 1047   | 49.777  | 47.528   |
| Total |           | 125418 | 2203   | 100.000 | 100.000  |

### Enantioenriched S-29, 95% ee

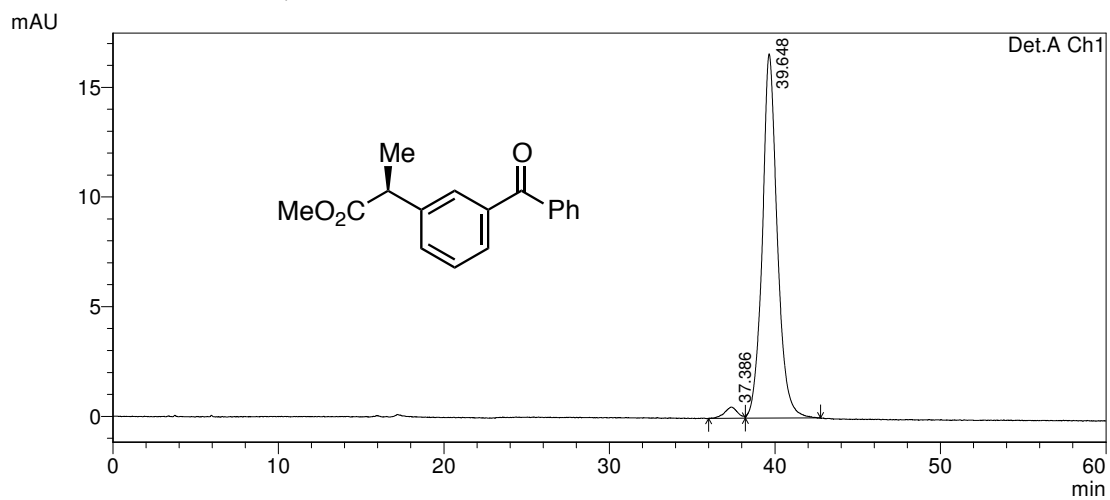

Detector A Ch1 254nm

| Peak# | Ret. Time | Area    | Height | Area %  | Height % |
|-------|-----------|---------|--------|---------|----------|
| 1     | 37.386    | 27762   | 513    | 2.592   | 2.995    |
| 2     | 39.648    | 1043427 | 16616  | 97.408  | 97.005   |
| Total |           | 1071188 | 17129  | 100.000 | 100.000  |

### Racemic S-27

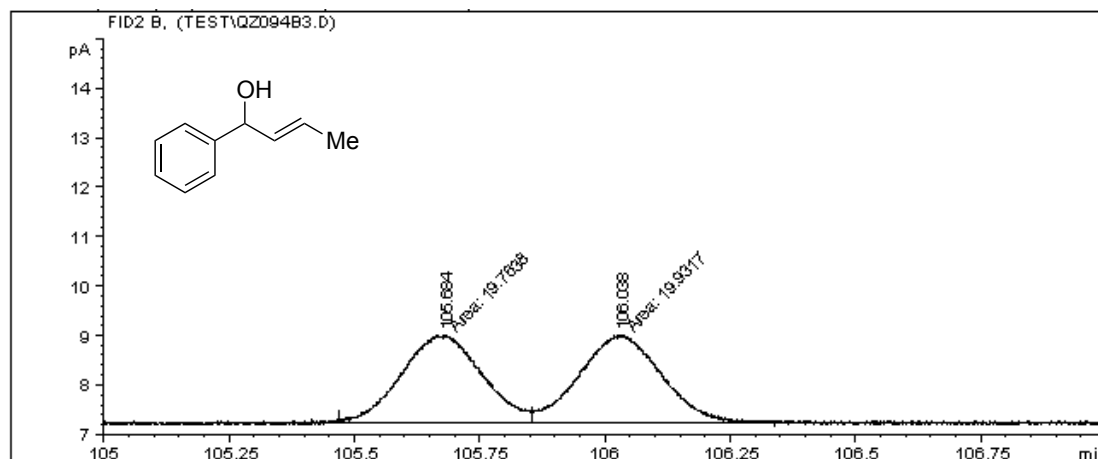

| Peak #   | RetTime [min] | Type | Width [min] | Area [pA*s] | Height [pA] | Area %   |
|----------|---------------|------|-------------|-------------|-------------|----------|
| 1        | 105.684       | FM   | 0.1869      | 19.76379    | 1.76283     | 49.78847 |
| 2        | 106.038       | FM   | 0.1888      | 19.93172    | 1.75918     | 50.21153 |
| Totals : |               |      |             | 39.69551    | 3.52201     |          |

### Enantioenriched S-27, 96% ee

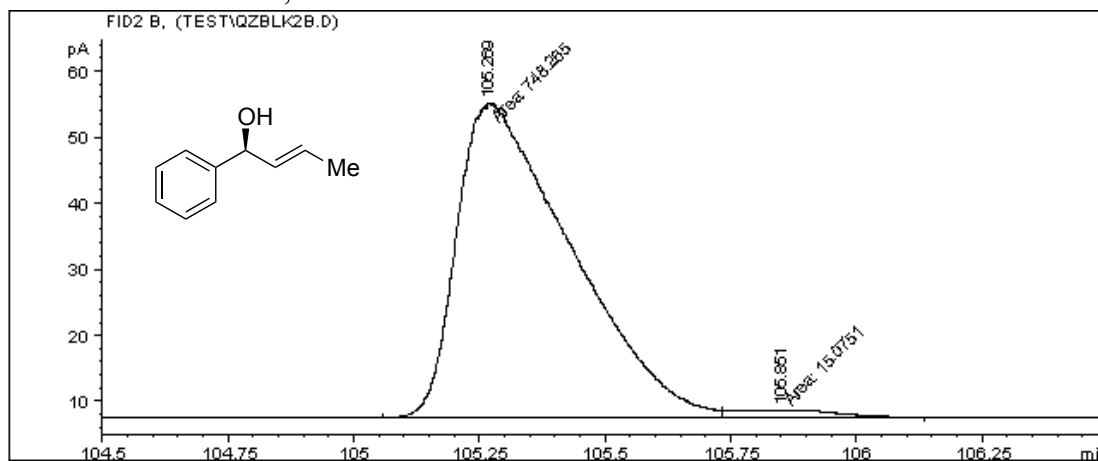

| Peak #   | RetTime [min] | Type | Width [min] | Area [pA*s] | Height [pA] | Area %   |
|----------|---------------|------|-------------|-------------|-------------|----------|
| 1        | 105.269       | MF   | 0.2624      | 748.26532   | 47.52031    | 98.02511 |
| 2        | 105.851       | FM   | 0.2294      | 15.07510    | 1.09533     | 1.97489  |
| Totals : |               |      |             | 763.34042   | 48.61564    |          |

### Racemic S-28

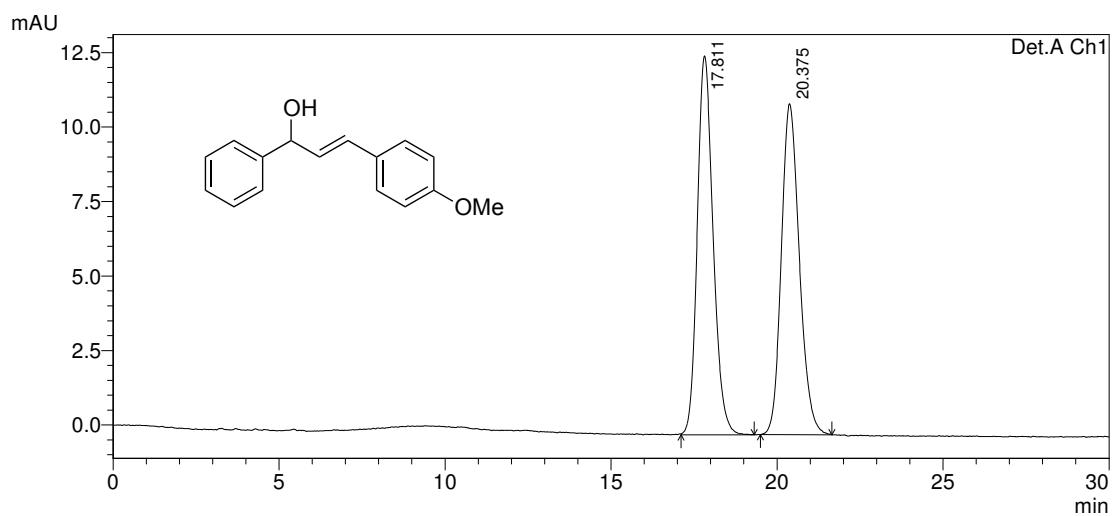

Detector A Ch1 254nm

| Peak# | Ret. Time | Area   | Height | Area %  | Height % |
|-------|-----------|--------|--------|---------|----------|
| 1     | 17.811    | 421028 | 12719  | 50.067  | 53.386   |
| 2     | 20.375    | 419895 | 11106  | 49.933  | 46.614   |
| Total |           | 840923 | 23825  | 100.000 | 100.000  |

### Enantioenriched S-28, 67% ee

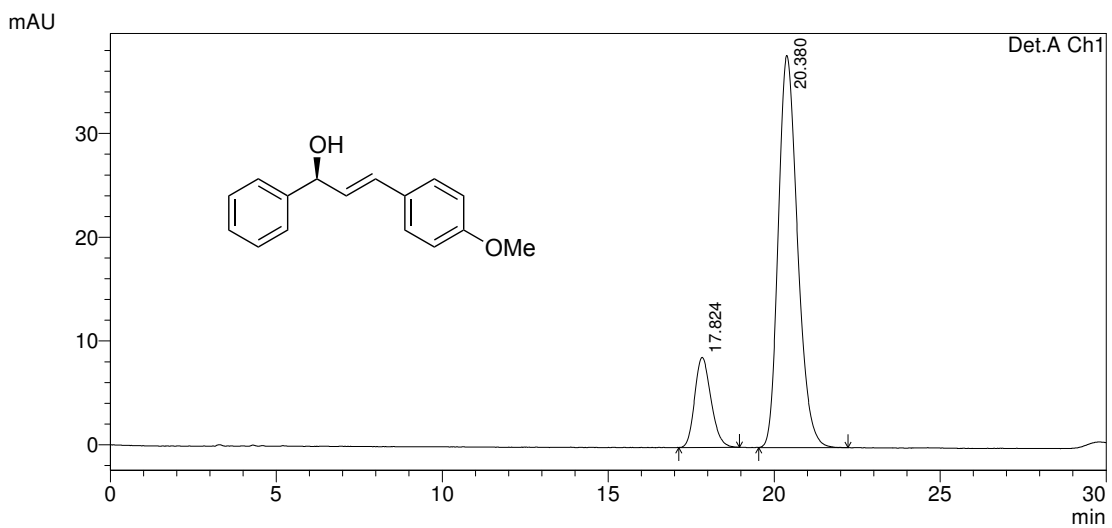

Detector A Ch1 254nm

| Peak# | Ret. Time | Area    | Height | Area %  | Height % |
|-------|-----------|---------|--------|---------|----------|
| 1     | 17.824    | 297238  | 8687   | 16.342  | 18.689   |
| 2     | 20.380    | 1521674 | 37796  | 83.658  | 81.311   |
| Total |           | 1818913 | 46483  | 100.000 | 100.000  |



### Racemic **28**

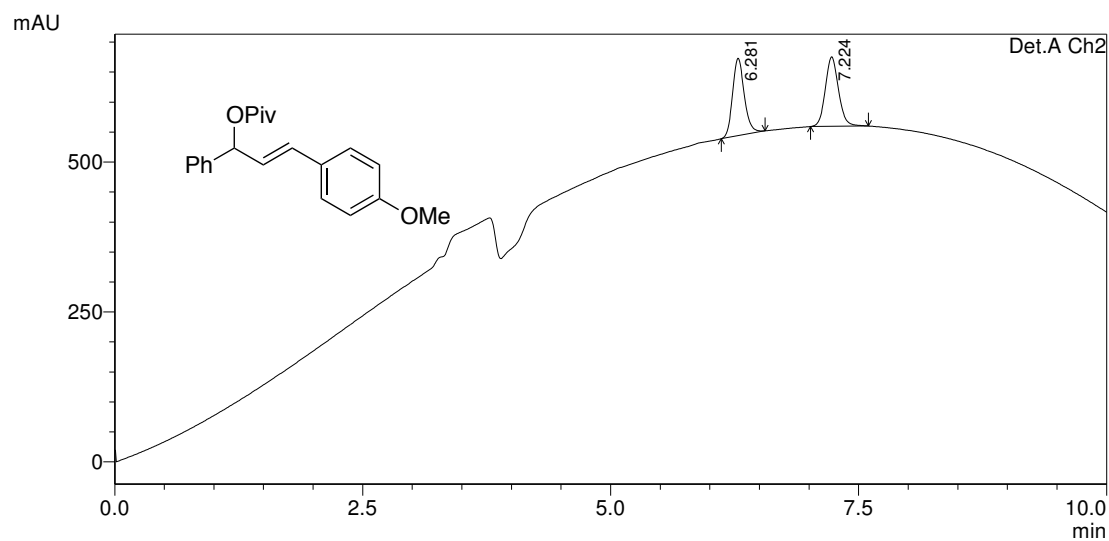

Detector A Ch2 210nm

| Peak# | Ret. Time | Area    | Height | Area %  | Height % |
|-------|-----------|---------|--------|---------|----------|
| 1     | 6.281     | 1057077 | 129088 | 49.605  | 52.686   |
| 2     | 7.224     | 1073915 | 115925 | 50.395  | 47.314   |
| Total |           | 2130992 | 245013 | 100.000 | 100.000  |

### Enantioenriched **28**, 66% ee

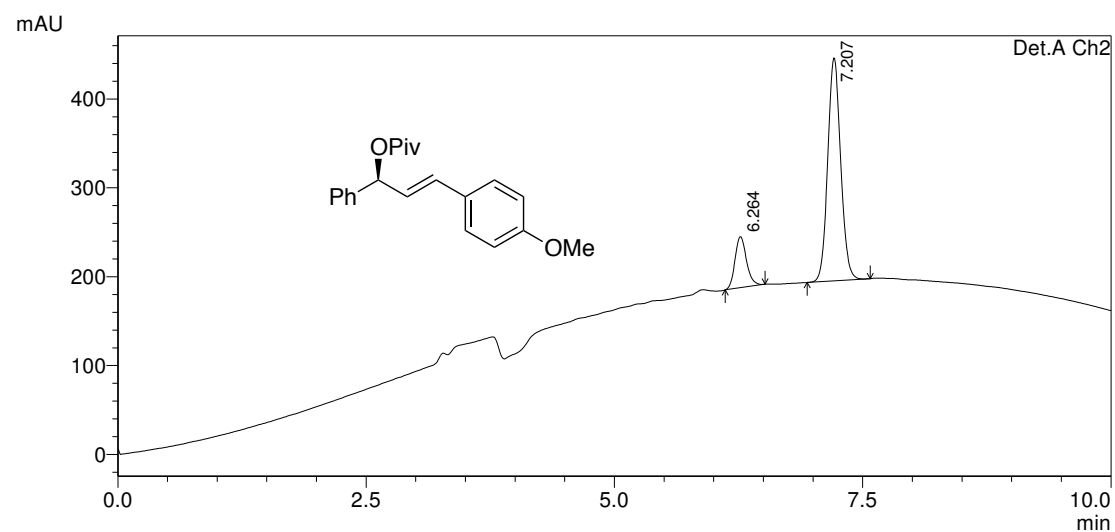

Detector A Ch2 210nm

| Peak# | Ret. Time | Area    | Height | Area %  | Height % |
|-------|-----------|---------|--------|---------|----------|
| 1     | 6.264     | 463024  | 57592  | 16.886  | 18.670   |
| 2     | 7.207     | 2279005 | 250877 | 83.114  | 81.330   |
| Total |           | 2742028 | 308469 | 100.000 | 100.000  |

### Mixture of **29** and Racemic **30**

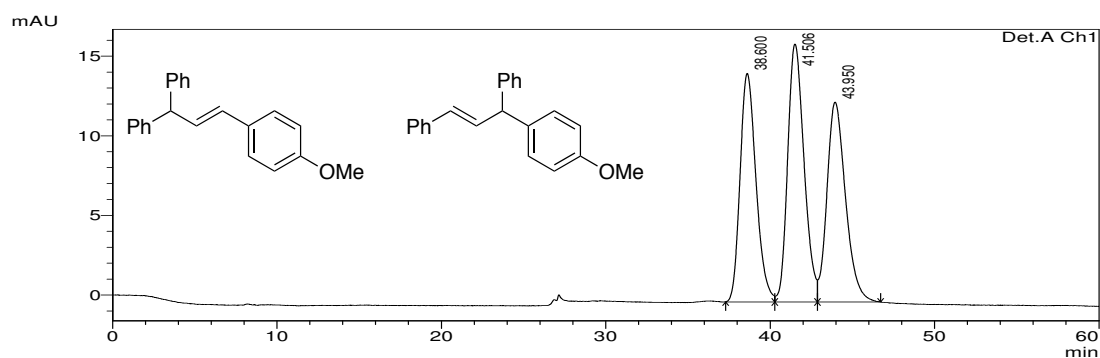

Detector A Ch1 254nm

| Peak# | Ret. Time | Area    | Height | Area %  | Height % |
|-------|-----------|---------|--------|---------|----------|
| 1     | 38.600    | 968147  | 14354  | 31.460  | 33.306   |
| 2     | 41.506    | 1121651 | 16195  | 36.449  | 37.578   |
| 3     | 43.950    | 987549  | 12548  | 32.091  | 29.116   |
| Total |           | 3077347 | 43098  | 100.000 | 100.000  |

### Racemic **30**

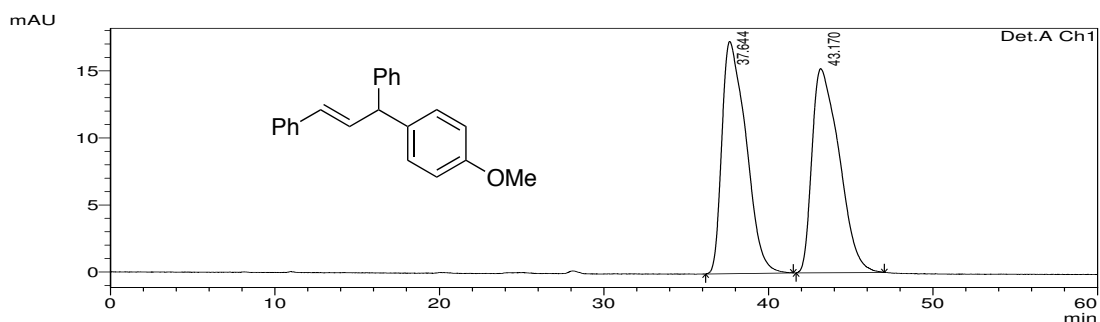

Detector A Ch1 254nm

| Peak# | Ret. Time | Area    | Height | Area %  | Height % |
|-------|-----------|---------|--------|---------|----------|
| 1     | 37.644    | 1763496 | 17331  | 50.233  | 53.226   |
| 2     | 43.170    | 1747151 | 15230  | 49.767  | 46.774   |
| Total |           | 3510647 | 32562  | 100.000 | 100.000  |

### Mixture of **29** and Enantioenriched **30** (60% ee)

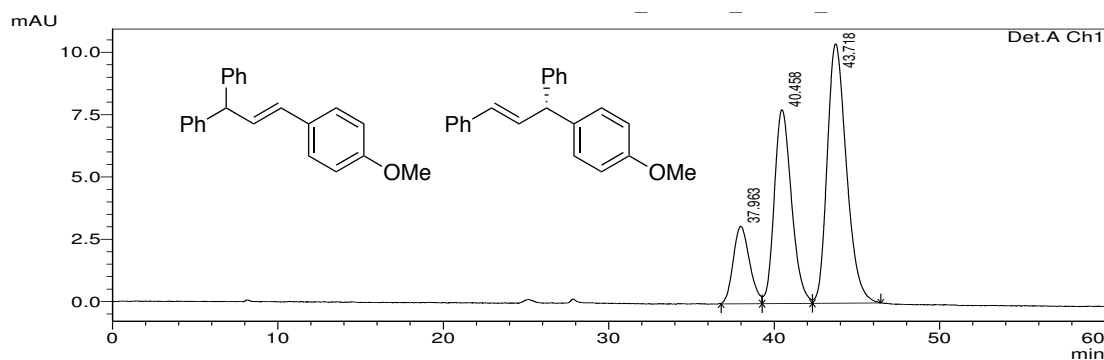

Detector A Ch1 254nm

| Peak# | Ret. Time | Area    | Height | Area %  | Height % |
|-------|-----------|---------|--------|---------|----------|
| 1     | 37.963    | 213435  | 3115   | 13.183  | 14.627   |
| 2     | 40.458    | 563166  | 7775   | 34.784  | 36.504   |
| 3     | 43.718    | 842453  | 10408  | 52.034  | 48.869   |
| Total |           | 1619054 | 21299  | 100.000 | 100.000  |

## Crystal Structure Report for (S)-17 (CCDC-973168)

A specimen of  $C_{16}H_{14}Cl_2$ , approximate dimensions 0.270 mm x 0.400 mm x 0.440 mm, was used for the X-ray crystallographic analysis. The X-ray intensity data were measured.

The total exposure time was 9.95 hours. The frames were integrated with the Bruker SAINT software package using a narrow-frame algorithm. The integration of the data using an orthorhombic unit cell yielded a total of 20983 reflections to a maximum  $\theta$  angle of  $73.55^\circ$  (0.80 Å resolution), of which 2806 were independent (average redundancy 7.478, completeness = 98.9%,  $R_{int} = 3.25\%$ ,  $R_{sig} = 2.06\%$ ) and 2788 (99.36%) were greater than  $2\sigma(F^2)$ . The final cell constants of  $a = 5.6849(8)$  Å,  $b = 7.6858(10)$  Å,  $c = 32.425(4)$  Å, volume =  $1416.7(3)$  Å<sup>3</sup>, are based upon the refinement of the XYZ-centroids of 9863 reflections above  $20\sigma(I)$  with  $11.83^\circ < 2\theta < 147.1^\circ$ . Data were corrected for absorption effects using the multi-scan method (SADABS). The ratio of minimum to maximum apparent transmission was 0.724. The calculated minimum and maximum transmission coefficients (based on crystal size) are 0.2748 and 0.4188.

The structure was solved and refined using the Bruker SHELXTL Software Package, using the space group P 21 21 21, with  $Z = 4$  for the formula unit,  $C_{16}H_{14}Cl_2$ . The final anisotropic full-matrix least-squares refinement on  $F^2$  with 164 variables converged at  $R1 = 2.88\%$ , for the observed data and  $wR2 = 8.08\%$  for all data. The goodness-of-fit was 1.025. The largest peak in the final difference electron density synthesis was  $0.276 e/\text{Å}^3$  and the largest hole was  $-0.220 e/\text{Å}^3$  with an RMS deviation of  $0.036 e/\text{Å}^3$ . On the basis of the final model, the calculated density was  $1.299 g/cm^3$  and  $F(000)$ , 576  $e^-$ .

## Table 1. Sample and crystal data for (S)-17.

|                        |                            |                     |
|------------------------|----------------------------|---------------------|
| Identification code    | mary015                    |                     |
| Chemical formula       | $C_{16}H_{14}Cl_2$         |                     |
| Formula weight         | 277.17                     |                     |
| Temperature            | 200(2) K                   |                     |
| Wavelength             | 1.54178 Å                  |                     |
| Crystal size           | 0.270 x 0.400 x 0.440 mm   |                     |
| Crystal system         | orthorhombic               |                     |
| Space group            | P 21 21 21                 |                     |
| Unit cell dimensions   | $a = 5.6849(8)$ Å          | $\alpha = 90^\circ$ |
|                        | $b = 7.6858(10)$ Å         | $\beta = 90^\circ$  |
|                        | $c = 32.425(4)$ Å          | $\gamma = 90^\circ$ |
| Volume                 | $1416.7(3)$ Å <sup>3</sup> |                     |
| Z                      | 4                          |                     |
| Density (calculated)   | $1.299 g/cm^3$             |                     |
| Absorption coefficient | $3.932 mm^{-1}$            |                     |
| F(000)                 | 576                        |                     |

## Table 2. Data collection and structure refinement for (S)-17.

|                                            |                                                                                                                                                               |                              |
|--------------------------------------------|---------------------------------------------------------------------------------------------------------------------------------------------------------------|------------------------------|
| <b>Theta range for data collection</b>     | 2.73 to 73.55°                                                                                                                                                |                              |
| <b>Index ranges</b>                        | -7<=h<=7, -9<=k<=9, -32<=l<=39                                                                                                                                |                              |
| <b>Reflections collected</b>               | 20983                                                                                                                                                         |                              |
| <b>Independent reflections</b>             | 2806 [R(int) = 0.0325]                                                                                                                                        |                              |
| <b>Coverage of independent reflections</b> | 98.9%                                                                                                                                                         |                              |
| <b>Absorption correction</b>               | multi-scan                                                                                                                                                    |                              |
| <b>Max. and min. transmission</b>          | 0.4188 and 0.2748                                                                                                                                             |                              |
| <b>Structure solution technique</b>        | direct methods                                                                                                                                                |                              |
| <b>Structure solution program</b>          | SHELXS-97 (Sheldrick, 2008)                                                                                                                                   |                              |
| <b>Refinement method</b>                   | Full-matrix least-squares on F <sup>2</sup>                                                                                                                   |                              |
| <b>Refinement program</b>                  | SHELXL-97 (Sheldrick, 2008)                                                                                                                                   |                              |
| <b>Function minimized</b>                  | Σ w(F <sub>o</sub> <sup>2</sup> - F <sub>c</sub> <sup>2</sup> ) <sup>2</sup>                                                                                  |                              |
| <b>Data / restraints / parameters</b>      | 2806 / 0 / 164                                                                                                                                                |                              |
| <b>Goodness-of-fit on F<sup>2</sup></b>    | 1.025                                                                                                                                                         |                              |
| <b>Δ/σ<sub>max</sub></b>                   | 0.001                                                                                                                                                         |                              |
| <b>Final R indices</b>                     | 2788 data;<br>I>2σ(I)                                                                                                                                         | R1 = 0.0288, wR2 =<br>0.0806 |
|                                            | all data                                                                                                                                                      | R1 = 0.0290, wR2 =<br>0.0808 |
| <b>Weighting scheme</b>                    | w=1/[σ <sup>2</sup> (F <sub>o</sub> <sup>2</sup> )+(0.0478P) <sup>2</sup> +0.3632P]<br>where P=(F <sub>o</sub> <sup>2</sup> +2F <sub>c</sub> <sup>2</sup> )/3 |                              |
| <b>Absolute structure parameter</b>        | 0.0(0)                                                                                                                                                        |                              |
| <b>Largest diff. peak and hole</b>         | 0.276 and -0.220 eÅ <sup>-3</sup>                                                                                                                             |                              |
| <b>R.M.S. deviation from mean</b>          | 0.036 eÅ <sup>-3</sup>                                                                                                                                        |                              |

### Table 3. Atomic coordinates and equivalent isotropic atomic displacement parameters (Å<sup>2</sup>) for (S)-17.

U(eq) is defined as one third of the trace of the orthogonalized U<sub>ij</sub> tensor.

|    | x/a       | y/b         | z/c        | U(eq)     |
|----|-----------|-------------|------------|-----------|
| C1 | 0.4469(3) | 0.1683(2)   | 0.21565(5) | 0.0349(4) |
| C2 | 0.4286(3) | 0.1699(2)   | 0.25857(5) | 0.0356(4) |
| C3 | 0.2386(3) | 0.25589(19) | 0.27638(5) | 0.0325(3) |
| C4 | 0.0703(3) | 0.3383(2)   | 0.25260(6) | 0.0374(4) |
| C5 | 0.0940(3) | 0.3351(2)   | 0.20982(5) | 0.0356(4) |
| C6 | 0.2809(3) | 0.25149(19) | 0.19077(5) | 0.0295(3) |
| C7 | 0.3019(3) | 0.2518(2)   | 0.14363(5) | 0.0341(3) |
| C8 | 0.2461(3) | 0.0744(2)   | 0.12590(5) | 0.0339(4) |

|     | x/a         | y/b        | z/c          | U(eq)       |
|-----|-------------|------------|--------------|-------------|
| C9  | 0.0853(3)   | 0.0478(2)  | 0.09675(5)   | 0.0321(3)   |
| C10 | 0.8084(3)   | 0.8693(2)  | 0.05562(5)   | 0.0325(3)   |
| C11 | 0.7382(3)   | 0.7147(2)  | 0.03709(5)   | 0.0340(3)   |
| C12 | 0.8825(3)   | 0.5704(2)  | 0.03977(5)   | 0.0314(3)   |
| C13 | 0.0957(3)   | 0.5769(2)  | 0.06084(5)   | 0.0347(4)   |
| C14 | 0.1620(3)   | 0.7316(2)  | 0.07961(5)   | 0.0331(3)   |
| C15 | 0.0207(3)   | 0.8804(2)  | 0.07753(4)   | 0.0293(3)   |
| C16 | 0.5463(4)   | 0.3127(3)  | 0.12941(6)   | 0.0493(5)   |
| Cl1 | 0.21302(11) | 0.26192(6) | 0.330252(13) | 0.05065(14) |
| Cl2 | 0.79771(10) | 0.37802(6) | 0.015223(13) | 0.04754(14) |

**Table 4. Bond lengths (Å)  
for (S)-17.**

|          |            |          |            |
|----------|------------|----------|------------|
| C1-C2    | 1.396(2)   | C1-C6    | 1.396(2)   |
| C1-H1    | 0.95       | C2-C3    | 1.391(2)   |
| C2-H2    | 0.95       | C3-C4    | 1.383(2)   |
| C3-Cl1   | 1.7535(16) | C4-C5    | 1.394(3)   |
| C4-H4    | 0.95       | C5-C6    | 1.387(2)   |
| C5-H5    | 0.95       | C6-C7    | 1.533(2)   |
| C7-C8    | 1.513(2)   | C7-C16   | 1.537(3)   |
| C7-H7    | 1.0        | C8-C9    | 1.331(2)   |
| C8-H8    | 0.95       | C9-C15   | 1.476(2)   |
| C9-H9    | 0.95       | C10-C11  | 1.390(2)   |
| C10-C15  | 1.403(2)   | C10-H10  | 0.95       |
| C11-C12  | 1.382(2)   | C11-H11  | 0.95       |
| C12-C13  | 1.392(2)   | C12-Cl2  | 1.7470(16) |
| C13-C14  | 1.388(2)   | C13-H13  | 0.95       |
| C14-C15  | 1.400(2)   | C14-H14  | 0.95       |
| C16-H16A | 0.98       | C16-H16B | 0.98       |
| C16-H16C | 0.98       |          |            |

**Table 5. Bond angles (°) for (S)-  
17.**

|           |            |           |            |
|-----------|------------|-----------|------------|
| C2-C1-C6  | 121.47(16) | C2-C1-H1  | 119.3      |
| C6-C1-H1  | 119.3      | C3-C2-C1  | 118.40(16) |
| C3-C2-H2  | 120.8      | C1-C2-H2  | 120.8      |
| C4-C3-C2  | 121.56(15) | C4-C3-Cl1 | 119.07(13) |
| C2-C3-Cl1 | 119.37(13) | C3-C4-C5  | 118.69(16) |
| C3-C4-H4  | 120.7      | C5-C4-H4  | 120.7      |

|               |            |               |            |
|---------------|------------|---------------|------------|
| C6-C5-C4      | 121.69(16) | C6-C5-H5      | 119.2      |
| C4-C5-H5      | 119.2      | C5-C6-C1      | 118.18(15) |
| C5-C6-C7      | 120.21(14) | C1-C6-C7      | 121.60(14) |
| C8-C7-C6      | 111.17(13) | C8-C7-C16     | 110.51(15) |
| C6-C7-C16     | 111.72(14) | C8-C7-H7      | 107.8      |
| C6-C7-H7      | 107.8      | C16-C7-H7     | 107.8      |
| C9-C8-C7      | 123.52(15) | C9-C8-H8      | 118.2      |
| C7-C8-H8      | 118.2      | C8-C9-C15     | 127.21(16) |
| C8-C9-H9      | 116.4      | C15-C9-H9     | 116.4      |
| C11-C10-C15   | 121.17(15) | C11-C10-H10   | 119.4      |
| C15-C10-H10   | 119.4      | C12-C11-C10   | 119.25(15) |
| C12-C11-H11   | 120.4      | C10-C11-H11   | 120.4      |
| C11-C12-C13   | 121.22(15) | C11-C12-C12   | 119.12(13) |
| C13-C12-C12   | 119.64(13) | C14-C13-C12   | 118.87(15) |
| C14-C13-H13   | 120.6      | C12-C13-H13   | 120.6      |
| C13-C14-C15   | 121.53(14) | C13-C14-H14   | 119.2      |
| C15-C14-H14   | 119.2      | C14-C15-C10   | 117.94(15) |
| C14-C15-C9    | 123.30(14) | C10-C15-C9    | 118.76(15) |
| C7-C16-H16A   | 109.5      | C7-C16-H16B   | 109.5      |
| H16A-C16-H16B | 109.5      | C7-C16-H16C   | 109.5      |
| H16A-C16-H16C | 109.5      | H16B-C16-H16C | 109.5      |

**Table 6. Torsion angles (°) for (S)-17.**

|                 |             |                 |             |
|-----------------|-------------|-----------------|-------------|
| C6-C1-C2-C3     | 0.5(3)      | C1-C2-C3-C4     | 0.0(3)      |
| C1-C2-C3-C11    | -179.32(14) | C2-C3-C4-C5     | -0.3(3)     |
| C11-C3-C4-C5    | 179.03(14)  | C3-C4-C5-C6     | 0.1(3)      |
| C4-C5-C6-C1     | 0.4(3)      | C4-C5-C6-C7     | -179.60(16) |
| C2-C1-C6-C5     | -0.7(3)     | C2-C1-C6-C7     | 179.30(16)  |
| C5-C6-C7-C8     | -107.64(17) | C1-C6-C7-C8     | 72.4(2)     |
| C5-C6-C7-C16    | 128.40(18)  | C1-C6-C7-C16    | -51.6(2)    |
| C6-C7-C8-C9     | 125.84(17)  | C16-C7-C8-C9    | -109.5(2)   |
| C7-C8-C9-C15    | 179.54(16)  | C15-C10-C11-C12 | -1.1(2)     |
| C10-C11-C12-C13 | 0.4(2)      | C10-C11-C12-C12 | -178.22(12) |
| C11-C12-C13-C14 | 0.4(2)      | C12-C12-C13-C14 | 179.00(12)  |
| C12-C13-C14-C15 | -0.5(2)     | C13-C14-C15-C10 | -0.2(2)     |
| C13-C14-C15-C9  | -179.49(15) | C11-C10-C15-C14 | 1.1(2)      |
| C11-C10-C15-C9  | -179.66(15) | C8-C9-C15-C14   | -17.4(3)    |

**Table 7. Anisotropic atomic displacement parameters ( $\text{\AA}^2$ ) for (S)-17.**

The anisotropic atomic displacement factor exponent takes the form:  $-2\pi^2 [h^2 a^{*2} U_{11} + \dots + 2 h k a^* b^* U_{12}]$

|     | $U_{11}$   | $U_{22}$   | $U_{33}$  | $U_{23}$     | $U_{13}$   | $U_{12}$    |
|-----|------------|------------|-----------|--------------|------------|-------------|
| C1  | 0.0362(8)  | 0.0336(8)  | 0.0350(8) | -0.0031(7)   | 0.0045(7)  | 0.0081(7)   |
| C2  | 0.0397(9)  | 0.0326(9)  | 0.0346(8) | 0.0025(7)    | -0.0018(7) | 0.0068(7)   |
| C3  | 0.0408(8)  | 0.0257(7)  | 0.0309(8) | -0.0027(6)   | 0.0024(6)  | -0.0039(7)  |
| C4  | 0.0343(9)  | 0.0362(9)  | 0.0416(9) | -0.0057(7)   | 0.0050(7)  | 0.0053(7)   |
| C5  | 0.0314(8)  | 0.0356(8)  | 0.0398(9) | -0.0008(7)   | -0.0042(7) | 0.0034(7)   |
| C6  | 0.0323(7)  | 0.0252(7)  | 0.0309(7) | -0.0027(6)   | -0.0032(6) | -0.0029(7)  |
| C7  | 0.0397(8)  | 0.0326(8)  | 0.0301(8) | -0.0011(6)   | -0.0027(6) | 0.0026(8)   |
| C8  | 0.0388(9)  | 0.0335(8)  | 0.0295(7) | -0.0006(6)   | -0.0013(6) | 0.0017(7)   |
| C9  | 0.0370(8)  | 0.0318(8)  | 0.0274(7) | 0.0020(6)    | 0.0005(6)  | 0.0007(7)   |
| C10 | 0.0315(8)  | 0.0368(8)  | 0.0293(7) | 0.0003(6)    | -0.0016(6) | 0.0065(7)   |
| C11 | 0.0302(8)  | 0.0443(9)  | 0.0274(7) | 0.0011(6)    | -0.0014(6) | -0.0006(7)  |
| C12 | 0.0382(9)  | 0.0322(8)  | 0.0237(7) | 0.0011(6)    | 0.0016(6)  | -0.0054(7)  |
| C13 | 0.0373(9)  | 0.0369(9)  | 0.0299(8) | 0.0035(7)    | -0.0016(7) | 0.0051(7)   |
| C14 | 0.0305(8)  | 0.0412(8)  | 0.0276(7) | 0.0004(6)    | -0.0038(6) | 0.0014(7)   |
| C15 | 0.0317(8)  | 0.0349(8)  | 0.0213(7) | 0.0017(6)    | 0.0025(6)  | -0.0014(7)  |
| C16 | 0.0550(12) | 0.0561(12) | 0.0367(9) | -0.0018(9)   | 0.0067(9)  | -0.0162(10) |
| C11 | 0.0776(3)  | 0.0446(2)  | 0.0298(2) | -0.00252(16) | 0.0078(2)  | 0.0012(2)   |
| C12 | 0.0649(3)  | 0.0365(2)  | 0.0412(2) | -0.00480(16) | -0.0075(2) | -0.0067(2)  |

**Table 8. Hydrogen atomic coordinates and isotropic atomic displacement**

## parameters ( $\text{\AA}^2$ ) for (S)-17.

|      | x/a     | y/b     | z/c    | U(eq) |
|------|---------|---------|--------|-------|
| H1   | 0.5751  | 0.1094  | 0.2031 | 0.042 |
| H2   | 0.5431  | 0.1137  | 0.2752 | 0.043 |
| H4   | -0.0589 | 0.3960  | 0.2652 | 0.045 |
| H5   | -0.0208 | 0.3917  | 0.1933 | 0.043 |
| H7   | 0.1834  | 0.3358  | 0.1326 | 0.041 |
| H8   | 0.3303  | -0.0233 | 0.1361 | 0.041 |
| H9   | 0.0031  | 0.1476  | 0.0872 | 0.038 |
| H10  | -0.2892 | -0.0307 | 0.0534 | 0.039 |
| H11  | -0.4073 | -0.2917 | 0.0228 | 0.041 |
| H13  | 0.1941  | -0.5228 | 0.0623 | 0.042 |
| H14  | 0.3068  | -0.2634 | 0.0942 | 0.04  |
| H16A | 0.6657  | 0.2302  | 0.1390 | 0.074 |
| H16B | 0.5790  | 0.4281  | 0.1409 | 0.074 |
| H16C | 0.5499  | 0.3187  | 0.0992 | 0.074 |
